# Supplementary material
Source: MDPI journal article supplement (https://www.mdpi.com/2073-4344/8/3/117)
Supplement: s1 [file s1]

## Sheet: S1 Annotated Genes
Table S1. Annotated genes
source	locus tag	start	end	strand	shared by	all source	average length	stdev	pseudo	stop codon	gene	product	EC number	other information
pgap	AYM39_00005	60	1376	+	4	girp	1318.5	3		1376	dnaA	chromosomal replication initiation protein DnaA		[img|Ga0113560_111|dnaA|chromosomal replication initiator protein|][rast|416.8.peg.1||Chromosomal replication initiator protein DnaA|][proka|PROKKA_00001|dnaA|Chromosomal replication initiator protein DnaA|]
pgap	AYM39_00010	1414	1593	+	2	gr	180	0		1593		hypothetical protein		[rast|416.8.peg.2||hypothetical protein|]
pgap	AYM39_00015	1688	2494	+	4	girp	807	0		2494		cobalamin-binding protein		[img|Ga0113560_112||iron complex transport system substrate-binding protein|][rast|416.8.peg.3||Periplasmic binding protein|][proka|PROKKA_00002||corrinoid ABC transporter substrate-binding protein|]
pgap	AYM39_00020	2586	3893	+	4	girp	1308	0		3893		hypothetical protein		[img|Ga0113560_113||Uncharacterized membrane-anchored protein|][rast|416.8.peg.4||Uncharacterized membrane-anchored protein|][proka|PROKKA_00003||hypothetical protein|]
pgap	AYM39_00025	4046	4495	+	4	girp	436.5	27		4495		hypothetical protein		[img|Ga0113560_114||hypothetical protein|][rast|416.8.peg.5||hypothetical protein|][proka|PROKKA_00004||hypothetical protein|]
pgap	AYM39_00030	4704	5801	+	4	girp	1098	0		5801		transposase		[img|Ga0113560_115||Transposase|][rast|416.8.peg.6||Mobile element protein|][proka|PROKKA_00005||Transposase DDE domain protein|]
pgap	AYM39_00035	6235	7359	-	4	girp	1125	0		6235		hypothetical protein		[img|Ga0113560_116||ABC-2 type transport system permease protein|][rast|416.8.peg.7||ABC-type multidrug transport system, permease component|][proka|PROKKA_00006|yhhJ|Inner membrane transport permease YhhJ|]
pgap	AYM39_00040	7362	10127	-	4	girp	2740.5	51		7362		multidrug ABC transporter ATP-binding protein		[img|Ga0113560_117||ribosome-dependent ATPase|][rast|416.8.peg.8||ABC-type multidrug transport system, permease component|][proka|PROKKA_00007|ybhF_1|putative ABC transporter ATP-binding protein YbhF|]
pgap	AYM39_00045	10124	11188	-	4	girp	1046.2	37.5		10124		glycoside hydrolase family 43		[img|Ga0113560_118||HlyD family secretion protein|][rast|416.8.peg.9||Putative membrane protein|][proka|PROKKA_00008||putative efflux pump membrane fusion protein|]
pgap	AYM39_00050	11213	12628	-	4	girp	1416	0		11213		transporter		[img|Ga0113560_119||efflux transporter, outer membrane factor (OMF) lipoprotein, NodT family|][rast|416.8.peg.10||RND efflux system, outer membrane lipoprotein CmeC|][proka|PROKKA_00009|ttgI_1|Toluene efflux pump outer membrane protein TtgI precursor|]
pgap	AYM39_00055	12618	12953	-	4	girp	331.5	3	pseudo	12618		[PSEUDO_pgap: TetR family transcriptional regulator]		[img|Ga0113560_1110||TetR/AcrR family transcriptional regulator, mexJK operon transcriptional repressor|][rast|416.8.peg.11||Transcriptional regulator, TetR family|][proka|PROKKA_00010||hypothetical protein|]
pgap	AYM39_00060	12952	13167	+	4	girp	216	0		13167		hypothetical protein		[img|Ga0113560_1111||MFS transporter, DHA2 family, multidrug resistance protein|][rast|416.8.peg.12||Multidrug resistance protein B|][proka|PROKKA_00011||hypothetical protein|]
pgap	AYM39_00065	13571	13948	+	4	girp	378	0		13948		hypothetical protein		[img|Ga0113560_1112||hypothetical protein|][rast|416.8.peg.13||hypothetical protein|][proka|PROKKA_00012||hypothetical protein|]
img	Ga0113560_1114	16150	16296	-	2	ip	147	0		16150		hypothetical protein		[proka|PROKKA_00014||hypothetical protein|]
pgap	AYM39_00070	14399	16210	+	4	girp	1812	0		16210		cell division protein FtsH		[img|Ga0113560_1113||cell division protease FtsH|3.4.24.-][rast|416.8.peg.15||Cell division protein FtsH (EC 3.4.24.-)|][proka|PROKKA_00013|ftsH_1|ATP-dependent zinc metalloprotease FtsH|3.4.24.-]
pgap	AYM39_00075	16551	17027	+	4	girp	461.2	31.5		17027		MarR family transcriptional regulator		[img|Ga0113560_1115||DNA-binding transcriptional regulator, MarR family|][rast|416.8.peg.16||Transcriptional regulator, MarR family|][proka|PROKKA_00015||putative HTH-type transcriptional regulator/GBAA_1941/BAS1801|]
pgap	AYM39_00080	17206	17625	+	4	girp	420	0		17625		hypothetical protein		[img|Ga0113560_1116||Integrase core domain-containing protein|][rast|416.8.peg.17||Mobile element protein|][proka|PROKKA_00016||Integrase core domain protein|]
pgap	AYM39_00090	18307	20412	-	4	girp	2148.8	28.5		18307		hypothetical protein		[img|Ga0113560_1118||Peptidoglycan hydrolase (amidase) enhancer domain|][rast|416.8.peg.18||hypothetical protein|][proka|PROKKA_00018||hypothetical protein|]
pgap	AYM39_00095	20494	21255	-	4	girp	762	0		20494		sugar ABC transporter permease		[img|Ga0113560_1119||ABC-2 type transport system permease protein|][rast|416.8.peg.19||ABC-type multidrug transport system, permease component|][proka|PROKKA_00019|yadH_1|Inner membrane transport permease YadH|]
pgap	AYM39_00100	21252	22181	-	4	girp	953.2	32.3		21252		multidrug ABC transporter ATP-binding protein		[img|Ga0113560_1120||ABC-2 type transport system ATP-binding protein|][rast|416.8.peg.20||ABC-type multidrug transport system, ATPase component|][proka|PROKKA_00020|ybhF_2|putative ABC transporter ATP-binding protein YbhF|]
pgap	AYM39_00110	22738	23490	-	4	girp	753	0		22738		metal-dependent hydrolase		[img|Ga0113560_1122||hypothetical protein|][rast|416.8.peg.21||Putative predicted metal-dependent hydrolase|][proka|PROKKA_00022||hypothetical protein|]
pgap	AYM39_00115	23495	26827	-	4	girp	3333	0		23495		restriction endonuclease subunit R		[img|Ga0113560_1123||type I restriction enzyme, R subunit|3.1.21.3][rast|416.8.peg.22||Type I restriction-modification system, restriction subunit R (EC 3.1.21.3)|3.1.21.3][proka|PROKKA_00023|hsdR_1|Type-1 restriction enzyme R protein|3.1.21.3]
pgap	AYM39_00120	26827	27885	-	4	girp	1059	0		26827		hypothetical protein		[img|Ga0113560_1124||Predicted nuclease of restriction endonuclease-like (RecB) superfamily, DUF1016 family|][rast|416.8.peg.23||FIG074102: hypothetical protein|][proka|PROKKA_00024||hypothetical protein|]
pgap	AYM39_00125	27882	29108	-	4	girp	1227	0		27882		hypothetical protein		[img|Ga0113560_1125||type I restriction enzyme, S subunit|3.1.21.3][rast|416.8.peg.24||Type I restriction-modification system, specificity subunit S (EC 3.1.21.3)|3.1.21.3][proka|PROKKA_00025||EcoKI restriction-modification system protein HsdS|]
pgap	AYM39_00130	29101	31605	-	4	girp	2505	0		29101		restriction endonuclease subunit M		[img|Ga0113560_1126|hsdM|type I restriction enzyme M protein|2.1.1.72][rast|416.8.peg.25||Type I restriction-modification system, DNA-methyltransferase subunit M (EC 2.1.1.72)|2.1.1.72][proka|PROKKA_00026||putative type I restriction enzymeP M protein|2.1.1.72]
pgap	AYM39_00135	32016	33263	+	4	girp	1257.8	19.5		33263		transposase		[img|Ga0113560_1127||Transposase (or an inactivated derivative)|][rast|416.8.peg.26||Mobile element protein|][proka|PROKKA_00027||Transposase, Mutator family|]
pgap	AYM39_00140	34081	35670	-	4	girp	1590	0		34081	guaA	GMP synthase		[img|Ga0113560_1128|guaA|GMP synthase (glutamine-hydrolysing)|6.3.5.2][rast|416.8.peg.27||GMP synthase [glutamine-hydrolyzing] (EC 6.3.5.2)|6.3.5.2][proka|PROKKA_00028|guaA|GMP synthase [glutamine-hydrolyzing]|6.3.5.2]
pgap	AYM39_00145	35747	36646	-	4	girp	931.5	36.4		35747		methyltransferase type 11		[img|Ga0113560_1129||Methyltransferase domain-containing protein|][rast|416.8.peg.28||SAM-dependent methyltransferase BT3209|][proka|PROKKA_00029||bifunctional 3-demethylubiquinone-9 3-methyltransferase/ 2-octaprenyl-6-hydroxy phenol methylase|]
pgap	AYM39_00150	36789	38255	-	4	girp	1467	0		36789		IMP dehydrogenase		[img|Ga0113560_1130|guaB|IMP dehydrogenase|1.1.1.205][rast|416.8.peg.29||Inosine-5'-monophosphate dehydrogenase (EC 1.1.1.205)|1.1.1.205][proka|PROKKA_00030|guaB|Inosine-5'-monophosphate dehydrogenase|1.1.1.205]
pgap	AYM39_00155	38341	38817	-	4	girp	477	0		38341		hypothetical protein		[img|Ga0113560_1131||hypothetical protein|][rast|416.8.peg.30||hypothetical protein|][proka|PROKKA_00031||hypothetical protein|]
pgap	AYM39_00160	38817	39416	-	4	girp	600	0		38817		abortive infection protein		[img|Ga0113560_1132||hypothetical protein|][rast|416.8.peg.31||hypothetical protein|][proka|PROKKA_00032||CAAX amino terminal protease self- immunity|]
pgap	AYM39_00165	39503	39775	+	4	girp	273	0		39775		hypothetical protein		[img|Ga0113560_1133||hypothetical protein|][rast|416.8.peg.32||Protein YcgL|][proka|PROKKA_00033|ycgL|Protein YcgL|]
pgap	AYM39_00170	39860	40882	+	4	girp	1023	0		40882		hypothetical protein		[img|Ga0113560_1134||hypothetical protein|][rast|416.8.peg.33||FIG00808377: hypothetical protein|][proka|PROKKA_00034||hypothetical protein|]
pgap	AYM39_00175	40892	41194	+	4	girp	303	0		41194		lipase		[img|Ga0113560_1135||protein of unknown function (DUF4389)|][rast|416.8.peg.34||Possible lipase|][proka|PROKKA_00035||hypothetical protein|]
pgap	AYM39_00180	41201	42316	+	4	girp	1116	0		42316		DNA polymerase IV		[img|Ga0113560_1136||DNA polymerase-4|2.7.7.7][rast|416.8.peg.35||DNA polymerase IV (EC 2.7.7.7)|2.7.7.7][proka|PROKKA_00036|dinB_1|DNA polymerase IV|2.7.7.7]
pgap	AYM39_00185	42497	47380	+	4	girp	4884	0		47380		alpha-2-macroglobulin		[img|Ga0113560_1137||hypothetical protein|][rast|416.8.peg.36||Large extracellular alpha-helical protein|][proka|PROKKA_00037||MG2 domain protein|]
pgap	AYM39_00190	47528	48763	+	4	girp	1236	0		48763		hypothetical protein		[img|Ga0113560_1138||hypothetical protein|][rast|416.8.peg.37||hypothetical protein|][proka|PROKKA_00038||hypothetical protein|]
img	Ga0113560_1139	49546	49710	+	3	irp	165	0		49710		hypothetical protein		[rast|416.8.peg.38||hypothetical protein|][proka|PROKKA_00039||hypothetical protein|]
pgap	AYM39_00195	49874	50545	+	4	girp	672	0		50545		hypothetical protein		[img|Ga0113560_1140||Uncharacterized membrane protein YdjX, TVP38/TMEM64 family, SNARE-associated domain|][rast|416.8.peg.39||COG0398: uncharacterized membrane protein|][proka|PROKKA_00040|ydjZ_1|TVP38/TMEM64 family inner membrane protein YdjZ|]
pgap	AYM39_00200	50668	51735	+	4	girp	1068	0		51735		alkene reductase		[img|Ga0113560_1141||2,4-dienoyl-CoA reductase|][rast|416.8.peg.40||N-ethylmaleimide reductase (EC 1.-.-.-)|][proka|PROKKA_00041|nemA|N-ethylmaleimide reductase|1.-.-.-]
pgap	AYM39_00205	51909	52610	-	4	girp	718.5	19.1		51909		hypothetical protein		[img|Ga0113560_1142||VPLPA-CTERM protein sorting domain-containing protein|][rast|416.8.peg.41||hypothetical protein|][proka|PROKKA_00042||hypothetical protein|]
pgap	AYM39_00210	52729	54894	-	4	girp	2166	0		52729		toxin		[img|Ga0113560_1143||Zeta toxin|][rast|416.8.peg.42||hypothetical protein|][proka|PROKKA_00043||Zeta toxin|]
pgap	AYM39_00215	55163	57193	+	4	girp	2031	0		57193		hypothetical protein		[img|Ga0113560_1144||methyl-accepting chemotaxis protein|][rast|416.8.peg.43||Methyl-accepting chemotaxis protein|][proka|PROKKA_00044|pctB_1|Methyl-accepting chemotaxis protein PctB|]
pgap	AYM39_00220	57246	57788	+	4	girp	543	0		57788		glutathione peroxidase		[img|Ga0113560_1145||glutathione peroxidase|1.11.1.9][rast|416.8.peg.44||Glutathione peroxidase family protein|][proka|PROKKA_00045||hypothetical protein|]
pgap	AYM39_00225	57817	58239	-	4	girp	448.5	51		57817		MerR family transcriptional regulator		[img|Ga0113560_1146||DNA-binding transcriptional regulator, MerR family|][rast|416.8.peg.45||Transcriptional regulator, MerR family|][proka|PROKKA_00046|cueR|HTH-type transcriptional regulator CueR|]
pgap	AYM39_00230	58373	59014	+	4	girp	642	0		59014		thiopurine S-methyltransferase		[img|Ga0113560_1147||thiopurine S-methyltransferase|2.1.1.67][rast|416.8.peg.46||Thiopurine S-methyltransferase (EC 2.1.1.67)|2.1.1.67][proka|PROKKA_00047|tpm|Thiopurine S-methyltransferase|2.1.1.67]
pgap	AYM39_00235	60056	61051	+	4	girp	996	0		61051		hypothetical protein		[img|Ga0113560_1148||hypothetical protein|][rast|416.8.peg.48||hypothetical protein|][proka|PROKKA_00048||hypothetical protein|]
pgap	AYM39_00240	61248	62189	+	4	girp	942	0		62189		hypothetical protein		[img|Ga0113560_1149||Dienelactone hydrolase|][rast|416.8.peg.49||hypothetical protein|][proka|PROKKA_00049||Dienelactone hydrolase family protein|]
pgap	AYM39_00245	62311	62550	-	4	girp	240	0		62311		transcriptional regulator		[img|Ga0113560_1150||Rho-binding antiterminator|][rast|416.8.peg.50||Rho-specific inhibitor of transcription termination (YaeO)|][proka|PROKKA_00050||Rho-binding antiterminator|]
pgap	AYM39_00250	62547	62798	-	2	gr	207	63.6		62547		hypothetical protein		[rast|416.8.peg.51||hypothetical protein|]
pgap	AYM39_00255	63220	64353	+	4	girp	1131.8	4.5		64353		hypothetical protein		[img|Ga0113560_1151||Permuted papain-like amidase enzyme, YaeF/YiiX, C92 family|][rast|416.8.peg.53||hypothetical protein|][proka|PROKKA_00051||hypothetical protein|]
pgap	AYM39_00260	64450	65259	+	4	girp	789.8	40.5		65259		dioxygenase		[img|Ga0113560_1152||Aromatic ring-opening dioxygenase, catalytic subunit, LigB family|][rast|416.8.peg.54||FIG074102: hypothetical protein|][proka|PROKKA_00052||LigB family dioxygenase|]
pgap	AYM39_00265	65446	66696	+	4	girp	1251	0		66696		sodium:proton symporter		[img|Ga0113560_1153||dicarboxylate/amino acid:cation (Na+ or H+) symporter, DAACS family|][rast|416.8.peg.55||Proton/glutamate symport protein @ Sodium/glutamate symport protein|][proka|PROKKA_00053|gltT_1|Proton/sodium-glutamate symport protein|]
pgap	AYM39_00270	66706	67302	-	4	girp	597	0		66706		hypothetical protein		[img|Ga0113560_1154||Endonuclease, Uma2 family (restriction endonuclease fold)|][rast|416.8.peg.56||hypothetical protein|][proka|PROKKA_00054||hypothetical protein|]
pgap	AYM39_00275	67453	70182	+	4	girp	2730	0		70182		DNA polymerase I		[img|Ga0113560_1155||DNA polymerase-1|2.7.7.7][rast|416.8.peg.57||DNA polymerase I (EC 2.7.7.7)|2.7.7.7][proka|PROKKA_00055|polA|DNA polymerase I|2.7.7.7]
pgap	AYM39_00280	70189	71094	+	4	girp	906	0		71094		MBL fold metallo-hydrolase		[img|Ga0113560_1156||Phosphoribosyl 1,2-cyclic phosphodiesterase|][rast|416.8.peg.58||beta-lactamase domain protein|][proka|PROKKA_00056||ribonuclease Z|]
pgap	AYM39_00285	71111	72541	-	4	girp	1431	0		71111		bifunctional heptose 7-phosphate kinase/heptose 1-phosphate adenyltransferase		[img|Ga0113560_1157||D-beta-D-heptose 7-phosphate kinase / D-beta-D-heptose 1-phosphate adenosyltransferase|2.7.1.167; 2.7.7.70][rast|416.8.peg.59||ADP-heptose synthase (EC 2.7.-.-) / D-glycero-beta-D-manno-heptose 7-phosphate kinase|][proka|PROKKA_00057|hldE|Bifunctional protein HldE|]
pgap	AYM39_00290	72614	72961	+	4	girp	348	0		72961		arsenate reductase		[img|Ga0113560_1158||arsenate reductase|1.20.4.1][rast|416.8.peg.60||Arsenate reductase (EC 1.20.4.1)|1.20.4.1][proka|PROKKA_00058|arsC|Arsenate reductase|1.20.4.1]
pgap	AYM39_00295	72961	73548	+	4	girp	588	0		73548		NAD(P)H-quinone oxidoreductase		[img|Ga0113560_1159||NAD(P)H dehydrogenase (quinone)|1.6.5.2][rast|416.8.peg.61||Flavoprotein WrbA|][proka|PROKKA_00059||NAD(P)H dehydrogenase (quinone)|1.6.5.2]
pgap	AYM39_00300	73890	74075	-	1	g	186	0		73890		hypothetical protein
pgap	AYM39_00305	74400	75497	-	4	girp	1098	0		74400		transposase		[img|Ga0113560_1160||Transposase|][rast|416.8.peg.62||Mobile element protein|][proka|PROKKA_00060||Transposase DDE domain protein|]
pgap	AYM39_00310	75622	75960	+	4	girp	339	0		75960		hypothetical protein		[img|Ga0113560_1161||RNA polymerase sigma-70 factor, ECF subfamily|][rast|416.8.peg.63||FIG006045: Sigma factor, ECF subfamily|][proka|PROKKA_00061|fecI_1|putative RNA polymerase sigma factor FecI|]
pgap	AYM39_00315	76163	77131	+	4	girp	999	34.6		77131		hypothetical protein		[img|Ga0113560_1162||transmembrane sensor|][rast|416.8.peg.64||Iron siderophore sensor protein|][proka|PROKKA_00062||fec operon regulator FecR|]
pgap	AYM39_00320	77331	79745	+	4	girp	2415	0		79745		TonB-dependent receptor		[img|Ga0113560_1163||iron complex outermembrane recepter protein|][rast|416.8.peg.65||TonB-dependent siderophore receptor|][proka|PROKKA_00063|pupA_1|Ferric-pseudobactin 358 receptor precursor|]
pgap	AYM39_00325	80276	80998	+	4	girp	783.8	40.5		80998		hypothetical protein		[img|Ga0113560_1164||VPLPA-CTERM protein sorting domain-containing protein|][rast|416.8.peg.67||hypothetical protein|][proka|PROKKA_00064||hypothetical protein|]
pgap	AYM39_00330	81249	81974	+	4	girp	795	79.7		81974		hypothetical protein		[img|Ga0113560_1165||hypothetical protein|][rast|416.8.peg.68||hypothetical protein|][proka|PROKKA_00065||hypothetical protein|]
pgap	AYM39_00335	82016	83623	+	4	girp	1624.5	22.6		83623		hypothetical protein		[img|Ga0113560_1166||hypothetical protein|][rast|416.8.peg.69||hypothetical protein|][proka|PROKKA_00066||BNR/Asp-box repeat protein|]
pgap	AYM39_00340	83642	84274	+	4	girp	630.8	4.5		84274		hypothetical protein		[img|Ga0113560_1167||hypothetical protein|][rast|416.8.peg.70||hypothetical protein|][proka|PROKKA_00067||hypothetical protein|]
img	Ga0113560_1168	84322	84471	-	3	irp	150	0		84322		Multicopper oxidase		[rast|416.8.peg.71||Multicopper oxidase|][proka|PROKKA_00068||Multicopper oxidase|]
pgap	AYM39_00345	84472	84948	+	4	girp	477	0		84948		MEKHLA domain-containing protein		[img|Ga0113560_1169||MEKHLA domain-containing protein|][rast|416.8.peg.72||hypothetical protein|][proka|PROKKA_00069||MEKHLA domain protein|]
pgap	AYM39_00350	84987	85463	+	4	girp	477	0		85463		hypothetical protein		[img|Ga0113560_1170||CreA protein|][rast|416.8.peg.73||Conserved uncharacterized protein CreA|][proka|PROKKA_00070||hypothetical protein|]
pgap	AYM39_00355	85472	87412	-	4	girp	1941	0		85472		hybrid sensor histidine kinase/response regulator		[img|Ga0113560_1171||Signal transduction histidine kinase|][rast|416.8.peg.74||Circadian input kinase A|][proka|PROKKA_00071|barA_1|Signal transduction histidine-protein kinase BarA|2.7.13.3]
pgap	AYM39_00360	87409	87924	-	4	girp	511.5	9		87409		hypothetical protein		[img|Ga0113560_1172||protein of unknown function (DUF4154)|][rast|416.8.peg.75||putative transmembrane protein|][proka|PROKKA_00072||hypothetical protein|]
pgap	AYM39_00365	87939	89978	-	4	girp	2040	0		87939		TonB-dependent receptor		[img|Ga0113560_1173||iron complex outermembrane recepter protein|][rast|416.8.peg.76||TonB-dependent receptor; Outer membrane receptor for ferrienterochelin and colicins|][proka|PROKKA_00073|cirA_1|Colicin I receptor precursor|]
pgap	AYM39_00370	90072	90920	-	4	girp	849	0		90072		aldo/keto reductase		[img|Ga0113560_1174||Aldo/keto reductase|][rast|416.8.peg.77||2,5-diketo-D-gluconic acid reductase (EC 1.1.1.-)|][proka|PROKKA_00074|ytbE|putative oxidoreductase YtbE|1.-.-.-]
pgap	AYM39_00375	91591	92484	+	4	girp	923.2	19.5		92484		hypothetical protein		[img|Ga0113560_1175||T5orf172 domain-containing protein|][rast|416.8.peg.78||hypothetical protein|][proka|PROKKA_00075||T5orf172 domain protein|]
pgap	AYM39_00380	92974	94137	+	4	girp	1164	0		94137		histidine kinase		[img|Ga0113560_1176||Uncharacterized conserved protein, contains FIST_N domain|][rast|416.8.peg.79||hypothetical protein|][proka|PROKKA_00076||FIST N domain protein|]
pgap	AYM39_00385	94134	96005	+	4	girp	1872	0		96005		hypothetical protein		[img|Ga0113560_1177||diguanylate cyclase (GGDEF) domain-containing protein|][rast|416.8.peg.80||diguanylate cyclase/phosphodiesterase (GGDEF & EAL domains) with PAS/PAC sensor(s)|][proka|PROKKA_00077|gmr_1|Cyclic di-GMP phosphodiesterase Gmr|3.1.4.52]
pgap	AYM39_00390	96041	96256	-	4	girp	252	41.6		96041		hypothetical protein		[img|Ga0113560_1178||Diguanylate cyclase, GGDEF domain|][rast|416.8.peg.81||diguanylate cyclase/phosphodiesterase (GGDEF & EAL domains) with PAS/PAC sensor(s)|][proka|PROKKA_00078||GGDEF domain protein|]
pgap	AYM39_00395	96325	97672	-	4	girp	733	410	pseudo	96325		[PSEUDO_pgap: transposase]		[img|Ga0113560_1179||transposase, IS5 family|][rast|416.8.peg.82||Mobile element protein|][proka|PROKKA_00079||Transposase DDE domain protein|]
img	Ga0113560_1180	96884	97672	-	3	irp	789	0		96884		transposase, IS5 family		[rast|416.8.peg.83||Mobile element protein|][proka|PROKKA_00080||hypothetical protein|]
pgap	AYM39_00400	98658	100190	+	4	girp	1533	0		100190		hypothetical protein		[img|Ga0113560_1181||hypothetical protein|][rast|416.8.peg.84||hypothetical protein|][proka|PROKKA_00081||hypothetical protein|]
pgap	AYM39_00405	100160	101860	+	4	girp	1701	0		101860		hypothetical protein		[img|Ga0113560_1182||hypothetical protein|][rast|416.8.peg.85||hypothetical protein|][proka|PROKKA_00082||hypothetical protein|]
pgap	AYM39_00410	102015	102569	-	4	girp	555	0		102015		GCN5 family acetyltransferase		[img|Ga0113560_1183||Ribosomal protein S18 acetylase RimI|][rast|416.8.peg.86||Histone acetyltransferase HPA2 and related acetyltransferases|][proka|PROKKA_00083||TDP-fucosamine acetyltransferase|]
pgap	AYM39_00415	102595	103065	-	4	girp	471	0		102595		hypothetical protein		[img|Ga0113560_1184||hypothetical protein|][rast|416.8.peg.87||hypothetical protein|][proka|PROKKA_00084||hypothetical protein|]
pgap	AYM39_00420	103767	104786	+	4	girp	1057.5	75		104786		hypothetical protein		[img|Ga0113560_1185||AAA domain-containing protein, putative AbiEii toxin, Type IV TA system|][rast|416.8.peg.88||hypothetical protein|][proka|PROKKA_00085||hypothetical protein|]
img	Ga0113560_1186	104779	105408	+	2	ip	630	0		105408		protein of unknown function (DUF4276)		[proka|PROKKA_00086||hypothetical protein|]
pgap	AYM39_00425	105490	106587	+	4	girp	1098	0		106587		transposase		[img|Ga0113560_1187||Transposase|][rast|416.8.peg.89||Mobile element protein|][proka|PROKKA_00087||Transposase DDE domain protein|]
pgap	AYM39_00430	106998	109385	-	4	girp	2388	0		106998		ATP-dependent protease		[img|Ga0113560_1188||Predicted ATP-dependent protease|][rast|416.8.peg.90||ATP-dependent protease La (EC 3.4.21.53) Type II|3.4.21.53][proka|PROKKA_00088|lon_1|Lon protease|3.4.21.53]
pgap	AYM39_00435	109391	109999	-	4	girp	609	0		109391		hypothetical protein		[img|Ga0113560_1189||GTP cyclohydrolase II|][rast|416.8.peg.91||3,4-dihydroxy-2-butanone 4-phosphate synthase (EC 4.1.99.12) / GTP cyclohydrolase II (EC 3.5.4.25)|4.1.99.12; 3.5.4.25][proka|PROKKA_00089|ribBA_1|Riboflavin biosynthesis protein RibBA|]
pgap	AYM39_00440	110028	110222	-	4	girp	195	0		110028		hypothetical protein		[img|Ga0113560_1190||hypothetical protein|][rast|416.8.peg.92||hypothetical protein|][proka|PROKKA_00090||hypothetical protein|]
pgap	AYM39_00445	110277	112145	+	4	girp	1869	0		112145	gidA	tRNA uridine(34) 5-carboxymethylaminomethyl synthesis enzyme MnmG		[img|Ga0113560_1191|mnmG|tRNA uridine 5-carboxymethylaminomethyl modification enzyme|][rast|416.8.peg.93||tRNA uridine 5-carboxymethylaminomethyl modification enzyme GidA|][proka|PROKKA_00091|mnmG|tRNA uridine 5-carboxymethylaminomethyl modification enzyme MnmG|]
pgap	AYM39_00450	112145	112771	+	4	girp	627	0		112771		16S rRNA (guanine(527)-N(7))-methyltransferase RsmG		[img|Ga0113560_1192||16S rRNA (guanine527-N7)-methyltransferase|2.1.1.170][rast|416.8.peg.94||rRNA small subunit 7-methylguanosine (m7G) methyltransferase GidB|][proka|PROKKA_00092|rsmG|Ribosomal RNA small subunit methyltransferase G|2.1.1.170]
pgap	AYM39_00455	112764	113540	+	4	girp	777	0		113540		chromosome partitioning protein		[img|Ga0113560_1193||chromosome partitioning protein|][rast|416.8.peg.95||Chromosome (plasmid) partitioning protein ParA|][proka|PROKKA_00093|soj_1|Sporulation initiation inhibitor protein Soj|3.6.-.-]
pgap	AYM39_00460	113540	114391	+	4	girp	852.8	1.5		114391		chromosome partitioning protein ParB		[img|Ga0113560_1194||chromosome partitioning protein, ParB family|][rast|416.8.peg.96||Chromosome (plasmid) partitioning protein ParB|][proka|PROKKA_00094|parB|putative chromosome-partitioning protein ParB|]
pgap	AYM39_00465	114661	115029	+	4	girp	354.8	28.5		115029		ATP synthase I		[img|Ga0113560_1195||ATP synthase protein I|][rast|416.8.peg.97||FIG048548: ATP synthase protein I2|][proka|PROKKA_00095||F0F1 ATP synthase subunit I|]
pgap	AYM39_00470	115049	115813	+	4	girp	745.5	39		115813		F0F1 ATP synthase subunit A		[img|Ga0113560_1196|atpB|F-type H+-transporting ATPase subunit a|][rast|416.8.peg.98||ATP synthase F0 sector subunit a|][proka|PROKKA_00096|atpB_1|ATP synthase subunit a|]
pgap	AYM39_00475	115856	116140	+	4	girp	285	0		116140		ATP synthase F0F1 subunit C		[img|Ga0113560_1197||F-type H+-transporting ATPase subunit c|][rast|416.8.peg.99||ATP synthase F0 sector subunit c|][proka|PROKKA_00097|atpE_1|ATP synthase subunit c|]
pgap	AYM39_00480	116241	116714	+	4	girp	474	0		116714		ATP synthase subunit B		[img|Ga0113560_1198||F-type H+-transporting ATPase subunit b|][rast|416.8.peg.100||ATP synthase F0 sector subunit b|][proka|PROKKA_00098|atpF_1|ATP synthase subunit b|]
pgap	AYM39_00485	116718	117248	+	4	girp	531	0		117248		ATP synthase subunit delta		[img|Ga0113560_1199||F-type H+-transporting ATPase subunit delta|][rast|416.8.peg.101||ATP synthase delta chain (EC 3.6.3.14)|3.6.3.14][proka|PROKKA_00099|atpH|ATP synthase subunit delta|]
pgap	AYM39_00490	117270	118811	+	4	girp	1542	0		118811		ATP synthase subunit alpha		[img|Ga0113560_11100|atpA|F-type H+-transporting ATPase subunit alpha|3.6.3.14][rast|416.8.peg.102||ATP synthase alpha chain (EC 3.6.3.14)|3.6.3.14][proka|PROKKA_00100|atpA_1|ATP synthase subunit alpha|3.6.3.14]
pgap	AYM39_00495	118823	119686	+	4	girp	803.2	41.4		119686		F0F1 ATP synthase subunit gamma		[img|Ga0113560_11101||F-type H+-transporting ATPase subunit gamma|][rast|416.8.peg.103||ATP synthase gamma chain (EC 3.6.3.14)|3.6.3.14][proka|PROKKA_00101|atpG|ATP synthase gamma chain|]
pgap	AYM39_00500	119732	121105	+	4	girp	1374	0		121105		ATP synthase subunit beta		[img|Ga0113560_11102|atpD|F-type H+-transporting ATPase subunit beta|3.6.3.14][rast|416.8.peg.104||ATP synthase beta chain (EC 3.6.3.14)|3.6.3.14][proka|PROKKA_00102|atpD_1|ATP synthase subunit beta|3.6.3.14]
pgap	AYM39_00505	121130	121552	+	4	girp	423	0		121552		ATP synthase F0F1 subunit epsilon		[img|Ga0113560_11103||F-type H+-transporting ATPase subunit epsilon|][rast|416.8.peg.105||ATP synthase epsilon chain (EC 3.6.3.14)|3.6.3.14][proka|PROKKA_00103|atpC_1|ATP synthase epsilon chain|]
pgap	AYM39_00510	121624	123048	+	4	girp	1425	0		123048	glmU	bifunctional N-acetylglucosamine-1-phosphate uridyltransferase/glucosamine-1-phosphate acetyltransferase		[img|Ga0113560_11104||bifunctional UDP-N-acetylglucosamine pyrophosphorylase / Glucosamine-1-phosphate N-acetyltransferase|2.3.1.157; 2.7.7.23][rast|416.8.peg.106||N-acetylglucosamine-1-phosphate uridyltransferase (EC 2.7.7.23) / Glucosamine-1-phosphate N-acetyltransferase (EC 2.3.1.157)|2.7.7.23; 2.3.1.157][proka|PROKKA_00104|glmU|Bifunctional protein GlmU|]
pgap	AYM39_00515	123048	124883	+	4	girp	1836	0		124883		glutamine--fructose-6-phosphate aminotransferase		[img|Ga0113560_11105||glucosamine--fructose-6-phosphate aminotransferase (isomerizing)|2.6.1.16][rast|416.8.peg.107||Glucosamine--fructose-6-phosphate aminotransferase [isomerizing] (EC 2.6.1.16)|2.6.1.16][proka|PROKKA_00105|glmS|Glutamine--fructose-6-phosphate aminotransferase [isomerizing]|2.6.1.16]
pgap	AYM39_00520	125133	125585	+	4	girp	453	0		125585		cytosine deaminase		[img|Ga0113560_11106||cytosine deaminase|3.5.4.1][rast|416.8.peg.108||Cytosine deaminase (EC 3.5.4.1)|3.5.4.1][proka|PROKKA_00106|tadA_1|tRNA-specific adenosine deaminase|3.5.4.33]
pgap	AYM39_00525	125578	127476	+	4	girp	1899	0		127476		PAS domain S-box protein		[img|Ga0113560_11107||PAS domain S-box-containing protein/diguanylate cyclase (GGDEF) domain-containing protein|][rast|416.8.peg.109||diguanylate cyclase/phosphodiesterase (GGDEF & EAL domains) with PAS/PAC sensor(s)|][proka|PROKKA_00107|gmr_2|Cyclic di-GMP phosphodiesterase Gmr|3.1.4.52]
pgap	AYM39_00530	127766	128218	+	4	girp	474	24.2		128218		hypothetical protein		[img|Ga0113560_11108||Protein N-acetyltransferase, RimJ/RimL family|][rast|416.8.peg.110||Acetyltransferase, GNAT family|][proka|PROKKA_00108||putative acetyltransferase YhhY|]
pgap	AYM39_00535	128368	129162	-	4	girp	795	0		128368		hypothetical protein		[img|Ga0113560_11109||two-component system, LytT family, response regulator AlgR|][rast|416.8.peg.111||Response regulator of the LytR/AlgR family|][proka|PROKKA_00109|lytR|Sensory transduction protein LytR|]
pgap	AYM39_00540	129156	130481	-	4	girp	1326	0		129156		hypothetical protein		[img|Ga0113560_11110||two-component system, LytT family, sensor histidine kinase LytS|2.7.13.3][rast|416.8.peg.112||Autolysis histidine kinase LytS|][proka|PROKKA_00110|ypdA|Sensor histidine kinase YpdA|2.7.13.3]
pgap	AYM39_00545	130821	131822	+	4	girp	1029	54		131822		exo-beta-1,3-glucanase		[img|Ga0113560_11111||Exo-beta-1,3-glucanase, GH17 family|][rast|416.8.peg.113||putative beta (1-6) glucans synthase|][proka|PROKKA_00111||hypothetical protein|]
pgap	AYM39_00550	132039	132560	+	4	girp	522	0		132560		hypothetical protein		[img|Ga0113560_11112||RNA polymerase sigma-70 factor, ECF subfamily|][rast|416.8.peg.114||FIG006045: Sigma factor, ECF subfamily|][proka|PROKKA_00112|fecI_2|putative RNA polymerase sigma factor FecI|]
pgap	AYM39_00555	132784	133620	+	4	girp	904.5	45		133620		hypothetical protein		[img|Ga0113560_11113||transmembrane sensor|][rast|416.8.peg.115||Iron siderophore sensor protein|][proka|PROKKA_00113||fec operon regulator FecR|]
pgap	AYM39_00560	133716	136100	+	4	girp	2445.8	40.5		136100		hypothetical protein		[img|Ga0113560_11114||iron complex outermembrane recepter protein|][rast|416.8.peg.116||TonB-dependent siderophore receptor|][proka|PROKKA_00114|fhuA_1|Ferrichrome-iron receptor precursor|]
pgap	AYM39_00565	136480	137364	+	4	girp	885	0		137364		hypothetical protein		[img|Ga0113560_11116||PEP-CTERM protein-sorting domain-containing protein|][rast|416.8.peg.117||Alkaline phosphatase (EC 3.1.3.1)|3.1.3.1][proka|PROKKA_00115||hypothetical protein|]
pgap	AYM39_00570	137443	138621	+	4	girp	1179	0		138621		hypothetical protein		[img|Ga0113560_11117||probable extracellular repeat, HAF family|][rast|416.8.peg.118||hypothetical protein|][proka|PROKKA_00116||hypothetical protein|]
pgap	AYM39_00575	138763	139842	+	4	girp	1080	0		139842		hypothetical protein		[img|Ga0113560_11118||hypothetical protein|][rast|416.8.peg.120||hypothetical protein|][proka|PROKKA_00117||hypothetical protein|]
img	Ga0113560_11119	139964	140116	-	3	irp	153	0		139964		hypothetical protein		[rast|416.8.peg.121||hypothetical protein|][proka|PROKKA_00118||hypothetical protein|]
pgap	AYM39_00580	140395	141114	+	4	girp	720	0		141114		hypothetical protein		[img|Ga0113560_11120||hypothetical protein|][rast|416.8.peg.123||hypothetical protein|][proka|PROKKA_00119||hypothetical protein|]
pgap	AYM39_00585	141256	141972	+	4	girp	717	0		141972		transcriptional regulator		[img|Ga0113560_11121||DNA-binding regulatory protein, YebC/PmpR family|][rast|416.8.peg.124||FIG000859: hypothetical protein YebC|][proka|PROKKA_00120|yeeN|putative transcriptional regulatory protein YeeN|]
pgap	AYM39_00590	141976	142566	-	4	girp	591	0		141976		LOG family protein		[img|Ga0113560_11122||hypothetical protein|][rast|416.8.peg.125||Lysine decarboxylase family|][proka|PROKKA_00121|fas6|LOG family protein ORF6 in fasciation locus|]
img	Ga0113560_11123	142674	142814	-	3	irp	132	15.6		142674		hypothetical protein		[rast|416.8.peg.126||hypothetical protein|][proka|PROKKA_00122||hypothetical protein|]
pgap	AYM39_00595	142920	143387	-	4	girp	468	0		142920		signal transduction protein		[img|Ga0113560_11124||acetoin utilization protein AcuB|][rast|416.8.peg.127||CBS domain protein|][proka|PROKKA_00123||inosine 5'-monophosphate dehydrogenase|]
pgap	AYM39_00600	144146	144415	-	4	girp	272.2	1.5		144146		hypothetical protein		[img|Ga0113560_11125||hypothetical protein|][rast|416.8.peg.128||IncP-type DNA transfer primase TraC|][proka|PROKKA_00124|traC_1|DNA primase TraC|2.7.7.-]
img	Ga0113560_11126	144569	144724	-	3	irp	156	0		144569		hypothetical protein		[rast|416.8.peg.130||hypothetical protein|][proka|PROKKA_00125||hypothetical protein|]
pgap	AYM39_00605	144884	145363	-	4	girp	480	0		144884		cupin		[img|Ga0113560_11127||Uncharacterized conserved protein, cupin superfamily|][rast|416.8.peg.132||hypothetical protein|][proka|PROKKA_00126||Cupin domain protein|]
pgap	AYM39_00610	145366	146202	-	4	girp	837	0		145366		glutamate racemase		[img|Ga0113560_11128||glutamate racemase|5.1.1.3][rast|416.8.peg.133||Glutamate racemase (EC 5.1.1.3)|5.1.1.3][proka|PROKKA_00127|murI|Glutamate racemase|5.1.1.3]
pgap	AYM39_00615	146298	147353	-	4	girp	1056	0		146298		hydroxyacid dehydrogenase		[img|Ga0113560_11129||uncharacterized zinc-type alcohol dehydrogenase-like protein|1.-][rast|416.8.peg.134||Alcohol dehydrogenase (EC 1.1.1.1)|1.1.1.1][proka|PROKKA_00128|yahK|Aldehyde reductase YahK|1.1.1.2]
pgap	AYM39_00620	147526	148593	+	4	girp	1068	0		148593		A/G-specific adenine glycosylase		[img|Ga0113560_11130||A/G-specific adenine glycosylase|3.2.2.-][rast|416.8.peg.135||A/G-specific adenine glycosylase (EC 3.2.2.-)|][proka|PROKKA_00129|mutY|A/G-specific adenine glycosylase|3.2.2.-]
pgap	AYM39_00625	148577	148849	+	4	girp	267.8	10.5		148849		Fe(2+)-trafficking protein		[img|Ga0113560_11131||Fe-S cluster biosynthesis and repair protein YggX|][rast|416.8.peg.136||FIG001341: Probable Fe(2+)-trafficking protein YggX|][proka|PROKKA_00130||putative Fe(2+)-trafficking protein|]
pgap	AYM39_00630	149021	149524	+	4	girp	528.8	16.5		149524		hypothetical protein		[img|Ga0113560_11132||hemoglobin|][rast|416.8.peg.137||Cyanoglobin; Hemoglobin-like protein HbN|][proka|PROKKA_00131||hypothetical protein|]
pgap	AYM39_00635	149563	150099	-	4	girp	537	0		149563		hypothetical protein		[img|Ga0113560_11133||hypothetical protein|][rast|416.8.peg.138||hypothetical protein|][proka|PROKKA_00132||hypothetical protein|]
pgap	AYM39_00640	150137	151552	-	4	girp	1416	0		150137		dihydrolipoamide dehydrogenase		[img|Ga0113560_11134||dihydrolipoamide dehydrogenase|1.8.1.4][rast|416.8.peg.139||Dihydrolipoamide dehydrogenase of pyruvate dehydrogenase complex (EC 1.8.1.4)|1.8.1.4][proka|PROKKA_00133|lpdA|Dihydrolipoyl dehydrogenase|1.8.1.4]
pgap	AYM39_00645	151570	151752	+	4	girp	183	0		151752		hypothetical protein		[img|Ga0113560_11135||hypothetical protein|][rast|416.8.peg.140||hypothetical protein|][proka|PROKKA_00134||hypothetical protein|]
pgap	AYM39_00650	151761	152858	-	4	girp	1098	0		151761		hypothetical protein		[img|Ga0113560_11136||1-phosphatidylinositol phosphodiesterase|4.6.1.13][rast|416.8.peg.141||Phosphatidylinositol-specific phospholipase C (EC 4.6.1.13)|4.6.1.13][proka|PROKKA_00135|plcA_1|1-phosphatidylinositol phosphodiesterase precursor|4.6.1.13]
pgap	AYM39_00655	153281	153781	-	4	girp	501	0		153281		hypothetical protein		[img|Ga0113560_11137||Fe-S-cluster containining protein|][rast|416.8.peg.143||hypothetical protein|][proka|PROKKA_00136||Flagellin N-methylase|]
pgap	AYM39_00660	153812	154117	-	4	girp	337.5	36.4		153812		hypothetical protein		[img|Ga0113560_11138||hypothetical protein|][rast|416.8.peg.144||hypothetical protein|][proka|PROKKA_00137||hypothetical protein|]
pgap	AYM39_00665	154314	155015	-	4	girp	702	0		154314		hypothetical protein		[img|Ga0113560_11139||hypothetical protein|][rast|416.8.peg.145||hypothetical protein|][proka|PROKKA_00138||hypothetical protein|]
pgap	AYM39_00670	155229	155972	-	4	girp	744	0		155229		hypothetical protein		[img|Ga0113560_11140||VirD5 protein|][rast|416.8.peg.147||Protein VirD5 in virD operon|][proka|PROKKA_00139||Agrobacterium VirD5 protein|]
pgap	AYM39_00675	156136	157698	-	4	girp	1563	0		156136		hopanoid C-3 methylase HpnR		[img|Ga0113560_11141||hopanoid C-3 methylase HpnR|][rast|416.8.peg.149||Radical SAM domain protein|][proka|PROKKA_00140||B12 binding domain protein|]
pgap	AYM39_00680	158018	159097	+	4	girp	1080	0		159097		histidinol-phosphate aminotransferase		[img|Ga0113560_11142||histidinol-phosphate aminotransferase|2.6.1.9][rast|416.8.peg.150||Histidinol-phosphate aminotransferase (EC 2.6.1.9)|2.6.1.9][proka|PROKKA_00141|hisC2_1|Histidinol-phosphate aminotransferase 2|2.6.1.9]
pgap	AYM39_00685	159229	159828	+	4	girp	600	0		159828		ubiquinol-cytochrome c reductase iron-sulfur subunit		[img|Ga0113560_11143||ubiquinol-cytochrome c reductase iron-sulfur subunit|1.10.2.2][rast|416.8.peg.151||Ubiquinol-cytochrome C reductase iron-sulfur subunit (EC 1.10.2.2)|1.10.2.2][proka|PROKKA_00142|petA|Ubiquinol-cytochrome c reductase iron-sulfur subunit|1.10.2.2]
pgap	AYM39_00690	159825	161222	+	4	girp	1398	0		161222		cytochrome B		[img|Ga0113560_11144||ubiquinol-cytochrome c reductase cytochrome b subunit|][rast|416.8.peg.152||Ubiquinol--cytochrome c reductase, cytochrome B subunit (EC 1.10.2.2)|1.10.2.2][proka|PROKKA_00143|petB|Cytochrome b|]
pgap	AYM39_00695	161226	161948	+	4	girp	723	0		161948		cytochrome C		[img|Ga0113560_11145||ubiquinol-cytochrome c reductase cytochrome c1 subunit|][rast|416.8.peg.153||ubiquinol cytochrome C oxidoreductase, cytochrome C1 subunit|][proka|PROKKA_00144|petC|Cytochrome c1 precursor|]
img	Ga0113560_11146	162034	163947	-	3	irp	1914	0		162034		cell division protease FtsH	3.4.24.-	[rast|416.8.peg.154||Cell division protein FtsH (EC 3.4.24.-)|][proka|PROKKA_00145|ftsH_2|ATP-dependent zinc metalloprotease FtsH|3.4.24.-]
pgap	AYM39_00700	162154	163947	-	1	g	1794	0	pseudo	162154		[PSEUDO_pgap: cell division protein FtsH]
pgap	AYM39_00705	164519	165148	+	4	girp	747	78		165148		LexA family transcriptional regulator		[img|Ga0113560_11147||repressor LexA|3.4.21.88][rast|416.8.peg.156||SOS-response repressor and protease LexA (EC 3.4.21.88)|3.4.21.88][proka|PROKKA_00146|lexA_1|LexA repressor|3.4.21.88]
img	Ga0113560_11148	165161	165310	+	3	irp	143	12.1		165310		hypothetical protein		[rast|416.8.peg.157||hypothetical protein|][proka|PROKKA_00147||hypothetical protein|]
pgap	AYM39_00710	165356	165679	+	4	girp	324	0		165679		NGG1p interacting factor NIF3		[img|Ga0113560_11149||hypothetical protein|][rast|416.8.peg.158||Bsu YqfO NIF3/CutA domain|][proka|PROKKA_00148||Putative GTP cyclohydrolase 1 type 2|3.5.4.16]
pgap	AYM39_00715	165702	166856	-	4	girp	1155	0		165702		type IV pili twitching motility protein PilT		[img|Ga0113560_11150||twitching motility protein PilU|][rast|416.8.peg.159||Twitching motility protein PilT|][proka|PROKKA_00149|pilT_1|Twitching mobility protein|]
pgap	AYM39_00720	167018	169627	+	3	gir	2610	0		169627		hypothetical protein		[img|Ga0113560_11151||PAS domain S-box-containing protein|][rast|416.8.peg.161||diguanylate cyclase/phosphodiesterase (GGDEF & EAL domains) with PAS/PAC sensor(s)|]
pgap	AYM39_00725	169624	170256	+	4	girp	633	0		170256		LuxR family transcriptional regulator		[img|Ga0113560_11152||DNA-binding response regulator, NarL/FixJ family, contains REC and HTH domains|][rast|416.8.peg.162||DNA-binding response regulator, LuxR family, near polyamine transporter|][proka|PROKKA_00151|uvrY_1|Response regulator UvrY|]
pgap	AYM39_00730	170425	171468	+	4	girp	1038.8	10.5		171468		tRNA (5-methylaminomethyl-2-thiouridylate)-methyltransferase		[img|Ga0113560_11153||tRNA U34 2-thiouridine synthase MnmA/TrmU, contains the PP-loop ATPase domain|][rast|416.8.peg.163||tRNA (5-methylaminomethyl-2-thiouridylate)-methyltransferase (EC 2.1.1.61)|2.1.1.61][proka|PROKKA_00152||thiamine biosynthesis protein ThiI|]
pgap	AYM39_00735	171465	171689	+	4	girp	225	0		171689		SirA family protein		[img|Ga0113560_11154||tRNA 2-thiouridine synthesizing protein A|2.8.1.-][rast|416.8.peg.164||Rhodanese-like domain protein|][proka|PROKKA_00153|tusA_1|Sulfurtransferase TusA|2.8.1.-]
pgap	AYM39_00740	172037	172492	+	4	girp	318	126.1		172492		hypothetical protein		[img|Ga0113560_11155||hypothetical protein|][rast|416.8.peg.165||hypothetical protein|][proka|PROKKA_00154||hypothetical protein|]
img	Ga0113560_11156	172492	172587	+	2	ip	96	0		172587		hypothetical protein		[proka|PROKKA_00155||hypothetical protein|]
pgap	AYM39_00745	173018	174232	+	4	girp	1207.5	15		174232	argJ	ornithine acetyltransferase		[img|Ga0113560_11157||glutamate N-acetyltransferase / amino-acid N-acetyltransferase|2.3.1.1; 2.3.1.35][rast|416.8.peg.166||Glutamate N-acetyltransferase (EC 2.3.1.35) / N-acetylglutamate synthase (EC 2.3.1.1)|2.3.1.35; 2.3.1.1][proka|PROKKA_00156|argJ|Arginine biosynthesis bifunctional protein ArgJ|]
pgap	AYM39_00750	174240	175178	+	4	girp	939	0		175178		DNA mismatch repair protein MutT		[img|Ga0113560_11158||8-oxo-dGTP diphosphatase|3.6.1.55][rast|416.8.peg.167||Mutator mutT protein (7,8-dihydro-8-oxoguanine-triphosphatase) (EC 3.6.1.-) / Thiamin-phosphate pyrophosphorylase-like protein|][proka|PROKKA_00157|mutT|8-oxo-dGTP diphosphatase|3.6.1.55]
pgap	AYM39_00755	175217	176002	-	4	girp	786	0		175217		hypothetical protein		[img|Ga0113560_11159||Methyltransferase domain-containing protein|][rast|416.8.peg.168||hypothetical protein|][proka|PROKKA_00158||hypothetical protein|]
pgap	AYM39_00760	176025	176240	-	4	girp	216	0		176025		DNA gyrase inhibitor		[img|Ga0113560_11160||hypothetical protein|][rast|416.8.peg.169||FIG003276: zinc-binding protein|][proka|PROKKA_00159|yacG|DNA gyrase inhibitor YacG|]
pgap	AYM39_00765	176240	177013	-	4	girp	747	31.2		176240		cell division protein ZapD		[img|Ga0113560_11161||cell division protein ZapD|][rast|416.8.peg.170||FIG002842: hypothetical protein|][proka|PROKKA_00160|zapD|Cell division protein ZapD|]
pgap	AYM39_00770	177010	177621	-	4	girp	612	0		177010	coaE	dephospho-CoA kinase		[img|Ga0113560_11162||dephospho-CoA kinase|2.7.1.24][rast|416.8.peg.171||Dephospho-CoA kinase (EC 2.7.1.24)|2.7.1.24][proka|PROKKA_00161|coaE|Dephospho-CoA kinase|2.7.1.24]
pgap	AYM39_00775	177625	178491	-	4	girp	867	0		177625		methyltransferase		[img|Ga0113560_11163||leader peptidase (prepilin peptidase) / N-methyltransferase|2.1.1.-; 3.4.23.43][rast|416.8.peg.172||Leader peptidase (Prepilin peptidase) (EC 3.4.23.43) / N-methyltransferase (EC 2.1.1.-)|3.4.23.43][proka|PROKKA_00162|outO|Type 4 prepilin-like proteins leader peptide-processing enzyme|]
pgap	AYM39_00780	178552	179769	-	4	girp	1218	0		178552		type II secretion system protein F		[img|Ga0113560_11164||type IV pilus assembly protein PilC|][rast|416.8.peg.173||Type IV fimbrial assembly protein PilC|][proka|PROKKA_00163|gspF|Putative type II secretion system protein F|]
pgap	AYM39_00785	179772	181487	-	4	girp	1716	0		179772		type IV-A pilus assembly ATPase PilB		[img|Ga0113560_11165||type IV pilus assembly protein PilB|][rast|416.8.peg.174||Type IV fimbrial assembly, ATPase PilB|][proka|PROKKA_00164|epsE_1|Type II secretion system protein E|]
pgap	AYM39_00790	181650	183518	-	4	girp	1869	0		181650		phosphomethylpyrimidine synthase ThiC		[img|Ga0113560_11166|thiC|phosphomethylpyrimidine synthase|4.1.99.17][rast|416.8.peg.176||Hydroxymethylpyrimidine phosphate synthase ThiC (EC 4.1.99.17)|4.1.99.17][proka|PROKKA_00165|thiC|Phosphomethylpyrimidine synthase|4.1.99.17]
pgap	AYM39_00795	183813	185453	+	4	girp	1641	0		185453		exodeoxyribonuclease V subunit alpha		[img|Ga0113560_11168||exodeoxyribonuclease V alpha subunit|3.1.11.5][rast|416.8.peg.177||Exodeoxyribonuclease V alpha chain (EC 3.1.11.5)|3.1.11.5][proka|PROKKA_00166|recD_1|RecBCD enzyme subunit RecD|3.1.11.5]
pgap	AYM39_00805	185860	186864	-	4	girp	1005	0		185860		octaprenyl diphosphate synthase		[img|Ga0113560_11170||octaprenyl-diphosphate synthase|2.5.1.90][rast|416.8.peg.179||Octaprenyl-diphosphate synthase (EC 2.5.1.-) / Dimethylallyltransferase (EC 2.5.1.1) / Geranyltranstransferase (farnesyldiphosphate synthase) (EC 2.5.1.10) / Geranylgeranyl pyrophosphate synthetase (EC 2.5.1.29)|2.5.1.10; 2.5.1.29; 2.5.1.1][proka|PROKKA_00168|ispB|Octaprenyl-diphosphate synthase|2.5.1.90]
pgap	AYM39_00800	185450	185863	+	4	girp	414	0		185863		hypothetical protein		[img|Ga0113560_11169||hypothetical protein|][rast|416.8.peg.178||hypothetical protein|][proka|PROKKA_00167||hypothetical protein|]
pgap	AYM39_00810	187069	187380	+	4	girp	312	0		187380	rplU	50S ribosomal protein L21		[img|Ga0113560_11171|rplU|large subunit ribosomal protein L21|][rast|416.8.peg.180||LSU ribosomal protein L21p|][proka|PROKKA_00169|rplU|50S ribosomal protein L21|]
pgap	AYM39_00815	187396	187653	+	4	girp	258	0		187653	rpmA	50S ribosomal protein L27		[img|Ga0113560_11172|rpmA|large subunit ribosomal protein L27|][rast|416.8.peg.181||LSU ribosomal protein L27p|][proka|PROKKA_00170|rpmA|50S ribosomal protein L27|]
pgap	AYM39_00820	187732	188790	+	4	girp	1059	0		188790	obgE	GTPase ObgE		[img|Ga0113560_11173|obg|GTP-binding protein|3.6.5.-][rast|416.8.peg.182||GTP-binding protein Obg|][proka|PROKKA_00171|obg|GTPase Obg|]
pgap	AYM39_00825	188777	189898	+	4	girp	1122	0		189898		glutamate 5-kinase		[img|Ga0113560_11174||glutamate 5-kinase|2.7.2.11][rast|416.8.peg.183||Glutamate 5-kinase (EC 2.7.2.11) / RNA-binding C-terminal domain PUA|2.7.2.11][proka|PROKKA_00172|proB|Glutamate 5-kinase|2.7.2.11]
pgap	AYM39_00830	189942	191033	-	4	girp	1092	0		189942		ATPase		[img|Ga0113560_11175||ATP-binding protein involved in chromosome partitioning|][rast|416.8.peg.184||Scaffold protein for [4Fe-4S] cluster assembly ApbC, MRP-like|][proka|PROKKA_00173|ylxH_1|Flagellum site-determining protein YlxH|]
pgap	AYM39_00835	191384	192727	+	4	girp	1344	0		192727		hypothetical protein		[img|Ga0113560_11176||L,D-transpeptidase ErfK/SrfK|][rast|416.8.peg.185||ErfK/YbiS/YcfS/YnhG family protein|][proka|PROKKA_00174|ycfS|putative L,D-transpeptidase YcfS precursor|2.-.-.-]
pgap	AYM39_00840	192973	193605	-	4	girp	633	0		192973		pilus assembly protein PilZ		[img|Ga0113560_11177||PilZ domain-containing protein|][rast|416.8.peg.186||hypothetical protein|][proka|PROKKA_00175||PilZ domain protein|]
pgap	AYM39_00845	193699	194289	+	4	girp	591	0		194289		hypothetical protein		[img|Ga0113560_11178||hypothetical protein|][rast|416.8.peg.187||hypothetical protein|][proka|PROKKA_00176||hypothetical protein|]
pgap	AYM39_00850	194400	194879	+	4	girp	447.8	32.3		194879		peptidylprolyl isomerase		[img|Ga0113560_11179||FKBP-type peptidyl-prolyl cis-trans isomerase FkpA/FKBP-type peptidyl-prolyl cis-trans isomerase FklB|5.2.1.8; 5.2.1.8][rast|416.8.peg.188||FKBP-type peptidyl-prolyl cis-trans isomerase FkpA precursor (EC 5.2.1.8)|5.2.1.8][proka|PROKKA_00177|fkpA|putative FKBP-type peptidyl-prolyl cis-trans isomerase FkpA precursor|5.2.1.8]
pgap	AYM39_00855	195230	195778	-	2	gr	564	21.2		195230		colanic acid biosynthesis acetyltransferase WcaF		[rast|416.8.peg.189||Colanic acid biosynthesis acetyltransferase WcaF (EC 2.3.1.-)|]
pgap	AYM39_00860	196024	197706	+	4	girp	1683	0		197706		hypothetical protein		[img|Ga0113560_11180||xylan 1,4-beta-xylosidase|3.2.1.37][rast|416.8.peg.190||hypothetical protein|][proka|PROKKA_00178||Glycosyl hydrolases family 39|]
pgap	AYM39_00865	197923	199158	-	4	girp	1236	0		197923		colanic acid biosynthesis glycosyltransferase WcaI		[img|Ga0113560_11181||colanic acid biosynthesis glycosyl transferase WcaI|][rast|416.8.peg.191||Colanic acid biosysnthesis glycosyl transferase WcaI|][proka|PROKKA_00179||putative glycosyl transferase|]
pgap	AYM39_00870	199278	200195	-	4	girp	918	0		199278		glycosyl transferase		[img|Ga0113560_11182||Glycosyltransferase involved in cell wall bisynthesis|][rast|416.8.peg.192||Glycosyl transferase, family 2|][proka|PROKKA_00180||Glycosyl transferase family 2|]
pgap	AYM39_00875	200220	201179	-	4	girp	960	0		200220		hypothetical protein		[img|Ga0113560_11183||Nitroreductase|][rast|416.8.peg.193||putative NADH dehydrogenase/NAD(P)H nitroreductase|][proka|PROKKA_00181||Nitroreductase family protein|]
img	Ga0113560_11184	201192	201749	-	2	ip	558	0		201192		putative colanic acid biosynthesis acetyltransferase WcaF	2.3.1.-	[proka|PROKKA_00182||Putative acetyltransferase|2.3.1.-]
pgap	AYM39_00880	201742	202893	-	4	girp	1152	0		201742		hypothetical protein		[img|Ga0113560_11185||Polysaccharide pyruvyl transferase|][rast|416.8.peg.194||Gll3707 protein|][proka|PROKKA_00183||Polysaccharide pyruvyl transferase|]
pgap	AYM39_00885	202958	204133	-	4	girp	1176	0		202958		transferase		[img|Ga0113560_11186||Glycosyltransferase involved in cell wall bisynthesis|][rast|416.8.peg.195||Glycosyltransferase|][proka|PROKKA_00184|kanE_1|Alpha-D-kanosaminyltransferase|2.4.1.301]
pgap	AYM39_00890	204136	204936	-	3	gip	801	0		204136		hypothetical protein		[img|Ga0113560_11187||Glycosyl transferase family 2|][proka|PROKKA_00185|pglI_1|GalNAc(5)-diNAcBac-PP-undecaprenol beta-1,3-glucosyltransferase|2.4.1.293]
pgap	AYM39_00895	205098	207548	-	4	girp	2802	234		205098		hypothetical protein		[img|Ga0113560_11188||Glycosyl hydrolase-like 10|][rast|416.8.peg.196||hypothetical protein|][proka|PROKKA_00186||hypothetical protein|]
pgap	AYM39_00900	207988	210027	-	4	girp	2016	27.7		207988		hypothetical protein		[img|Ga0113560_11189||Membrane protein involved in the export of O-antigen and teichoic acid|][rast|416.8.peg.197||Acetyltransferase|][proka|PROKKA_00187|vatD|Streptogramin A acetyltransferase|2.3.1.-]
pgap	AYM39_00905	210063	211325	-	4	girp	1244.2	37.5		210063		hypothetical protein		[img|Ga0113560_11190||O-Antigen ligase|][rast|416.8.peg.198||Membrane protein|][proka|PROKKA_00188||hypothetical protein|]
pgap	AYM39_00910	211410	211922	-	3	gip	529	13.9		211410		hypothetical protein		[img|Ga0113560_11191||VanZ like family protein|][proka|PROKKA_00189||VanZ like family protein|]
pgap	AYM39_00915	212119	213540	-	4	girp	1422	0		212119		undecaprenyl-phosphate glucose phosphotransferase		[img|Ga0113560_11192||putative colanic acid biosysnthesis UDP-glucose lipid carrier transferase|][rast|416.8.peg.200||Capsular polysaccharide synthesis enzyme CpsA, sugar transferase|][proka|PROKKA_00190|wcaJ|UDP-glucose:undecaprenyl-phosphate glucose-1-phosphate transferase|2.7.8.31]
pgap	AYM39_00920	213977	214702	+	4	girp	755.2	58.5		214702		orotidine 5'-phosphate decarboxylase		[img|Ga0113560_11193|pyrF|orotidine-5'-phosphate decarboxylase|4.1.1.23][rast|416.8.peg.201||Orotidine 5'-phosphate decarboxylase (EC 4.1.1.23)|4.1.1.23][proka|PROKKA_00191|pyrF|Orotidine 5'-phosphate decarboxylase|4.1.1.23]
pgap	AYM39_00925	215112	215657	+	4	girp	546	0		215657		shikimate kinase		[img|Ga0113560_11194||shikimate kinase|2.7.1.71][rast|416.8.peg.202||Shikimate kinase I (EC 2.7.1.71)|2.7.1.71][proka|PROKKA_00192|aroK_1|Shikimate kinase 1|2.7.1.71]
pgap	AYM39_00930	215638	216720	+	4	girp	1083	0		216720		3-dehydroquinate synthase		[img|Ga0113560_11195||3-dehydroquinate synthase|4.2.3.4][rast|416.8.peg.203||3-dehydroquinate synthase (EC 4.2.3.4)|4.2.3.4][proka|PROKKA_00193|aroB|3-dehydroquinate synthase|4.2.3.4]
pgap	AYM39_00935	216710	218287	+	4	girp	1578	0		218287		hypothetical protein		[img|Ga0113560_11196||DamX protein|][rast|416.8.peg.204||Translation initiation factor 2|][proka|PROKKA_00194||Archaeal ATPase|]
pgap	AYM39_00940	218308	219381	+	4	girp	1074	0		219381	hemE	uroporphyrinogen decarboxylase		[img|Ga0113560_11197||uroporphyrinogen decarboxylase|4.1.1.37][rast|416.8.peg.205||Uroporphyrinogen III decarboxylase (EC 4.1.1.37)|4.1.1.37][proka|PROKKA_00195|hemE|Uroporphyrinogen decarboxylase|4.1.1.37]
pgap	AYM39_00945	219409	219828	+	4	girp	420	0		219828		hypothetical protein		[img|Ga0113560_11198||secondary thiamine-phosphate synthase enzyme|][rast|416.8.peg.206||FIG004064: hypothetical protein|][proka|PROKKA_00196||hypothetical protein|]
pgap	AYM39_00950	219839	220303	+	4	girp	465	0		220303		CopG family transcriptional regulator		[img|Ga0113560_11199||Uncharacterized conserved protein|][rast|416.8.peg.207||CopG protein|][proka|PROKKA_00197||Protein of unknown function, DUF|]
pgap	AYM39_00955	220369	221328	+	4	girp	960	0		221328		NAD-dependent dehydratase		[img|Ga0113560_11200||Nucleoside-diphosphate-sugar epimerase|][rast|416.8.peg.208||UDP-glucose 4-epimerase (EC 5.1.3.2)|5.1.3.2][proka|PROKKA_00198||3 beta-hydroxysteroid dehydrogenase/Delta 5-->4-isomerase|]
pgap	AYM39_00960	221328	222356	+	4	girp	1022.2	13.5		222356		glycosyl transferase		[img|Ga0113560_11201||Fuc2NAc and GlcNAc transferase|2.4.1.-][rast|416.8.peg.209||Undecaprenyl-phosphate N-acetylglucosaminyl 1-phosphate transferase (EC 2.7.8.-)|][proka|PROKKA_00199|tagO|putative undecaprenyl-phosphate N-acetylglucosaminyl 1-phosphate transferase|2.7.8.33]
pgap	AYM39_00965	222353	224182	+	4	girp	1830	0		224182		multidrug MFS transporter		[img|Ga0113560_11202||NDP-sugar epimerase, includes UDP-GlcNAc-inverting 4,6-dehydratase FlaA1 and capsular polysaccharide biosynthesis protein EpsC|][rast|416.8.peg.210||UDP-N-acetylglucosamine 4,6-dehydratase (EC 4.2.1.-)|][proka|PROKKA_00200|pglF|UDP-N-acetyl-alpha-D-glucosamine C6 dehydratase|4.2.1.135]
pgap	AYM39_00970	224200	224970	-	4	girp	771	0		224200		hypothetical protein		[img|Ga0113560_11203||hypothetical protein|][rast|416.8.peg.211||hypothetical protein|][proka|PROKKA_00201||hypothetical protein|]
pgap	AYM39_00975	224998	225957	-	4	girp	960	0		224998		flagellar motor protein MotB		[img|Ga0113560_11204||chemotaxis protein MotB|][rast|416.8.peg.212||Flagellar motor rotation protein MotB|][proka|PROKKA_00202|motB_1|Motility protein B|]
pgap	AYM39_00980	225971	226816	-	4	girp	846	0		225971		flagellar motor stator protein MotA		[img|Ga0113560_11205||chemotaxis protein MotA|][rast|416.8.peg.213||Flagellar motor rotation protein MotA|][proka|PROKKA_00203|motA|Motility protein A|]
pgap	AYM39_00985	226912	229578	-	4	girp	2667	0		226912		hopanoid biosynthesis-associated RND transporter HpnN		[img|Ga0113560_11206||hypothetical protein|][rast|416.8.peg.214||Hopanoid-associated RND transporter, HpnN|][proka|PROKKA_00204||MMPL family protein|]
pgap	AYM39_00990	229581	230555	-	4	girp	975	0		229581		calcium:proton antiporter		[img|Ga0113560_11207||cation:H+ antiporter|][rast|416.8.peg.215||Inner membrane protein YrbG, predicted calcium/sodium:proton antiporter|][proka|PROKKA_00205|yrbG|Inner membrane protein YrbG|]
pgap	AYM39_00995	230617	231444	-	4	girp	828	0		230617		undecaprenyl-diphosphatase		[img|Ga0113560_11208||undecaprenyl-diphosphatase|3.6.1.27][rast|416.8.peg.216||Undecaprenyl-diphosphatase (EC 3.6.1.27)|3.6.1.27][proka|PROKKA_00206|uppP|Undecaprenyl-diphosphatase|3.6.1.27]
pgap	AYM39_01000	231703	233274	+	4	girp	1572	0		233274		hypothetical protein		[img|Ga0113560_11209||hypothetical protein|][rast|416.8.peg.217||FIG00976694: hypothetical protein|][proka|PROKKA_00207||Zeta toxin|]
pgap	AYM39_01005	233277	234260	+	4	girp	984	0		234260		alcohol dehydrogenase		[img|Ga0113560_11210||alcohol dehydrogenase, propanol-preferring|1.1.1.1][rast|416.8.peg.218||Alcohol dehydrogenase (EC 1.1.1.1)|1.1.1.1][proka|PROKKA_00208|adh|Alcohol dehydrogenase|1.1.1.1]
pgap	AYM39_01010	234438	234872	+	4	girp	435	0		234872		hypothetical protein		[img|Ga0113560_11211||hypothetical protein|][rast|416.8.peg.219||hypothetical protein|][proka|PROKKA_00209||hypothetical protein|]
pgap	AYM39_01015	235167	236243	+	4	girp	1077	0		236243		hypothetical protein		[img|Ga0113560_11212||ParB-like nuclease domain-containing protein|][rast|416.8.peg.220||Phage protein|][proka|PROKKA_00210||ParB-like nuclease domain protein|]
pgap	AYM39_01025	237157	238104	-	4	girp	930	36		237157		DNA cytosine methyltransferase		[img|Ga0113560_11214||DNA (cytosine-5)-methyltransferase 1|2.1.1.37][rast|416.8.peg.222||DNA-cytosine methyltransferase (EC 2.1.1.37)|2.1.1.37][proka|PROKKA_00212|bspRIM|Modification methylase BspRI|2.1.1.37]
pgap	AYM39_01020	236387	237160	+	4	girp	879.8	70.5		237160		hypothetical protein		[img|Ga0113560_11213||hypothetical protein|][rast|416.8.peg.221||Phage protein|][proka|PROKKA_00211||hypothetical protein|]
pgap	AYM39_01030	238603	239850	+	4	girp	1257.8	19.5		239850		transposase		[img|Ga0113560_11215||Transposase (or an inactivated derivative)|][rast|416.8.peg.224||Mobile element protein|][proka|PROKKA_00213||Transposase, Mutator family|]
pgap	AYM39_01035	240204	242510	-	4	girp	2320.5	9		240204		hypothetical protein		[img|Ga0113560_11216||iron complex outermembrane recepter protein|][rast|416.8.peg.225||TonB-dependent receptor; Outer membrane receptor for ferrienterochelin and colicins|][proka|PROKKA_00214|fpvA|Ferripyoverdine receptor precursor|]
pgap	AYM39_01040	242712	246506	-	4	girp	3825	34.6		242712		cobalamin biosynthesis protein CobN		[img|Ga0113560_11217||cobaltochelatase CobN|6.6.1.2][rast|416.8.peg.226||CobN component of cobalt chelatase involved in B12 biosynthesis|][proka|PROKKA_00215|cobN|Aerobic cobaltochelatase subunit CobN|6.6.1.2]
pgap	AYM39_01045	246553	246888	-	4	girp	336	0		246553		hypothetical protein		[img|Ga0113560_11218||hypothetical protein|][rast|416.8.peg.227||FIG01058593: hypothetical protein|][proka|PROKKA_00216||hypothetical protein|]
pgap	AYM39_01050	246866	247471	-	4	girp	606	0		246866		flagellar motor protein MotA		[img|Ga0113560_11219||MotA/TolQ/ExbB proton channel family protein|][rast|416.8.peg.228||hypothetical transporter PduT for various metalloporphyrins|][proka|PROKKA_00217||MotA/TolQ/ExbB proton channel family protein|]
pgap	AYM39_01055	247690	248787	-	4	girp	1098	0		247690		hypothetical protein		[img|Ga0113560_11220||Hydrogenase/urease accessory protein HupE|][rast|416.8.peg.229||Membrane protein|][proka|PROKKA_00218||hypothetical protein|]
pgap	AYM39_01060	248798	251020	-	4	girp	2223	0		248798		TonB-dependent receptor		[img|Ga0113560_11221||Outer membrane receptor proteins, mostly Fe transport|][rast|416.8.peg.230||Outer membrane receptor proteins, mostly Fe transport|][proka|PROKKA_00219||vitamin B12/cobalamin outer membrane transporter|]
pgap	AYM39_01065	251029	252408	-	4	girp	1380	0		251029		hypothetical protein		[img|Ga0113560_11222||Hydrogenase/urease accessory protein HupE|][rast|416.8.peg.231||Nickel-binding accessory protein UreJ-HupE|][proka|PROKKA_00220||HupE / UreJ protein|]
pgap	AYM39_01070	252561	253028	-	4	girp	468	0		252561		nickel responsive regulator		[img|Ga0113560_11223||CopG family transcriptional regulator, nickel-responsive regulator|][rast|416.8.peg.232||Nickel responsive regulator NikR|][proka|PROKKA_00221|nikR|Nickel-responsive regulator|]
pgap	AYM39_01075	253174	253752	+	4	girp	579	0		253752		hypothetical protein		[img|Ga0113560_11224||hypothetical protein|][rast|416.8.peg.233||hypothetical protein|][proka|PROKKA_00222||hypothetical protein|]
pgap	AYM39_01080	253769	254179	+	4	girp	411	0		254179		hypothetical protein		[img|Ga0113560_11225||hypothetical protein|][rast|416.8.peg.234||hypothetical protein|][proka|PROKKA_00223||hypothetical protein|]
pgap	AYM39_01085	254189	254575	+	4	girp	387	0		254575		copper resistance protein CopC		[img|Ga0113560_11226||hypothetical protein/copper transport protein|][rast|416.8.peg.235||Copper resistance protein CopC precursor|][proka|PROKKA_00224||Copper resistance protein CopC|]
pgap	AYM39_01090	254572	255195	+	4	girp	624	0		255195		hypothetical protein		[img|Ga0113560_11227||hypothetical protein|][rast|416.8.peg.236||hypothetical protein|][proka|PROKKA_00225||hypothetical protein|]
pgap	AYM39_01095	255277	255750	+	4	girp	474	0		255750		hypothetical protein		[img|Ga0113560_11228||hypothetical protein|][rast|416.8.peg.237||blr6985; hypothetical protein|][proka|PROKKA_00226||hypothetical protein|]
pgap	AYM39_01100	255869	256540	+	4	girp	699	18		256540		hypothetical protein		[img|Ga0113560_11229||Protein of unknown function (DUF2490)|][rast|416.8.peg.238||hypothetical protein|][proka|PROKKA_00227||hypothetical protein|]
pgap	AYM39_01105	256618	256986	-	4	girp	369	0		256618		hypothetical protein		[img|Ga0113560_11230||hypothetical protein|][rast|416.8.peg.239||hypothetical protein|][proka|PROKKA_00228||hypothetical protein|]
pgap	AYM39_01110	257097	257663	-	4	girp	567	0		257097		hypothetical protein		[img|Ga0113560_11231||urease accessory protein|][rast|416.8.peg.240||HupE-UreJ family metal transporter|][proka|PROKKA_00229||HupE / UreJ protein|]
pgap	AYM39_01115	257939	258748	-	4	girp	749.2	121.5		257939		hypothetical protein		[img|Ga0113560_11232||protein of unknown function (DUF4465)|][rast|416.8.peg.241||probable aggregation factor core protein MAFp3, isoform E|][proka|PROKKA_00230||hypothetical protein|]
pgap	AYM39_01120	258779	259558	-	4	girp	780	0		258779		PEP-CTERM sorting domain-containing protein		[img|Ga0113560_11233||VPLPA-CTERM protein sorting domain-containing protein|][rast|416.8.peg.242||cell surface protein|][proka|PROKKA_00231||hypothetical protein|]
pgap	AYM39_01125	259555	261648	-	4	girp	2094	0		259555		hypothetical protein		[img|Ga0113560_11234||Outer membrane cobalamin receptor protein|][rast|416.8.peg.243||Outer membrane vitamin B12 receptor BtuB|][proka|PROKKA_00232|btuB_1|Vitamin B12 transporter BtuB precursor|]
pgap	AYM39_01130	262053	264323	-	4	girp	2271	0		262053		TonB-dependent receptor		[img|Ga0113560_11236||Fe(3+) dicitrate transport protein|][rast|416.8.peg.244||TonB-dependent receptor|][proka|PROKKA_00233|fecA_1|Fe(3+) dicitrate transport protein FecA precursor|]
pgap	AYM39_01135	264454	265779	-	4	girp	1323.8	1.5		264454		histidine kinase		[img|Ga0113560_11237||Signal transduction histidine kinase|][rast|416.8.peg.245||Sensor protein PhoQ (EC 2.7.13.3)|2.7.13.3][proka|PROKKA_00234|phoQ_1|Sensor protein PhoQ|2.7.13.3]
pgap	AYM39_01140	265776	266441	-	4	girp	666	0		265776		two-component system response regulator		[img|Ga0113560_11238||DNA-binding response regulator, OmpR family, contains REC and winged-helix (wHTH) domain|][rast|416.8.peg.246||Two-component response regulator|][proka|PROKKA_00235|qseB_1|Transcriptional regulatory protein QseB|]
pgap	AYM39_01145	266456	266848	-	4	girp	424.5	21.4		266456		hypothetical protein		[img|Ga0113560_11239||hypothetical protein|][rast|416.8.peg.247||hypothetical protein|][proka|PROKKA_00236||hypothetical protein|]
pgap	AYM39_01150	267098	267745	-	4	girp	713.2	87.9		267098		hypothetical protein		[img|Ga0113560_11240||protein TonB|][rast|416.8.peg.248||Ferric siderophore transport system, periplasmic binding protein TonB|][proka|PROKKA_00237||transport protein TonB|]
pgap	AYM39_01155	268026	269135	-	4	girp	1110	0		268026		hypothetical protein		[img|Ga0113560_11241||HupE / UreJ protein|][rast|416.8.peg.250||Membrane protein|][proka|PROKKA_00238||HupE / UreJ protein|]
pgap	AYM39_01160	269141	269794	-	4	girp	646.5	15		269141		hypothetical protein		[img|Ga0113560_11242||LPXTG-motif cell wall anchor domain-containing protein|][rast|416.8.peg.251||hypothetical protein|][proka|PROKKA_00239||hypothetical protein|]
pgap	AYM39_01165	269807	270184	-	4	girp	384.8	13.5		269807		copper resistance protein CopC		[img|Ga0113560_11243||hypothetical protein/copper transport protein|][rast|416.8.peg.252||Copper resistance protein CopC / Copper resistance protein CopD|][proka|PROKKA_00240|ycnJ|Copper transport protein YcnJ precursor|]
pgap	AYM39_01170	270208	271311	-	4	girp	1161	69.3	pseudo	270208		[PSEUDO_pgap: sialidase]		[img|Ga0113560_11244||BNR repeat-like domain-containing protein|][rast|416.8.peg.253||BNR repeat|][proka|PROKKA_00241||BNR/Asp-box repeat protein|]
pgap	AYM39_01175	271551	272954	-	4	girp	1404	0		271551		histidine kinase		[img|Ga0113560_11245||two-component system, OmpR family, sensor histidine kinase QseC|2.7.13.3][rast|416.8.peg.256||Sensory histidine kinase QseC|][proka|PROKKA_00242|qseC_1|Sensor protein QseC|2.7.13.3]
pgap	AYM39_01180	272954	273613	-	4	girp	660	0		272954		two-component system response regulator		[img|Ga0113560_11246||two-component system, OmpR family, response regulator/two-component system, OmpR family, response regulator QseB|][rast|416.8.peg.257||Two-component system response regulator QseB|][proka|PROKKA_00243|qseB_2|Transcriptional regulatory protein QseB|]
pgap	AYM39_01185	273707	274027	-	4	girp	321	0		273707		hypothetical protein		[img|Ga0113560_11247||hypothetical protein|][rast|416.8.peg.258||hypothetical protein|][proka|PROKKA_00244||hypothetical protein|]
pgap	AYM39_01190	274033	274233	-	4	girp	201	0		274033		(2Fe-2S)-binding protein		[img|Ga0113560_11248||BFD-like [2Fe-2S] binding domain-containing protein|][rast|416.8.peg.259||hypothetical protein|][proka|PROKKA_00245||BFD-like [2Fe-2S] binding domain protein|]
pgap	AYM39_01195	274248	274460	-	4	girp	213	0		274248		hypothetical protein		[img|Ga0113560_11249||Predicted nuclease of the RNAse H fold, HicB family|][rast|416.8.peg.260||hypothetical protein|][proka|PROKKA_00246||hypothetical protein|]
img	Ga0113560_11250	274767	274943	-	2	ip	177	0		274767		hypothetical protein		[proka|PROKKA_00247||hypothetical protein|]
pgap	AYM39_01200	274963	275940	-	4	girp	978	0		274963		thiazole synthase		[img|Ga0113560_11251|thiG|thiazole synthase|2.8.1.10][rast|416.8.peg.261||Thiazole biosynthesis protein ThiG|][proka|PROKKA_00248|thiG|Thiazole synthase|2.8.1.10]
pgap	AYM39_01205	275945	277024	-	4	girp	1080	0		275945		phospho-2-dehydro-3-deoxyheptonate aldolase		[img|Ga0113560_11252||3-deoxy-7-phosphoheptulonate synthase|2.5.1.54][rast|416.8.peg.262||2-keto-3-deoxy-D-arabino-heptulosonate-7- phosphate synthase I alpha (EC 2.5.1.54)|2.5.1.54][proka|PROKKA_00249|aroG|Phospho-2-dehydro-3-deoxyheptonate aldolase, Phe-sensitive|2.5.1.54]
pgap	AYM39_01210	277132	277926	+	4	girp	795	0		277926		sad1-interacting factor 2		[img|Ga0113560_11253||Uncharacterized protein, Rmd1/YagE family|][rast|416.8.peg.263||hypothetical protein|][proka|PROKKA_00250||hypothetical protein|]
img	Ga0113560_11255	278857	279948	-	3	irp	1092	0		278857		cobalamin biosynthetic protein CobC		[rast|416.8.peg.264||L-threonine 3-O-phosphate decarboxylase (EC 4.1.1.81)|4.1.1.81][proka|PROKKA_00252|cobD|Threonine-phosphate decarboxylase|4.1.1.81]
img	Ga0113560_11254	278267	278956	+	2	ip	690	0		278956		hypothetical protein		[proka|PROKKA_00251||hypothetical protein|]
pgap	AYM39_01215	278977	279948	-	1	g	972	0	pseudo	278977		[PSEUDO_pgap: threonine-phosphate decarboxylase]
pgap	AYM39_01220	279941	280858	-	4	girp	918	0		279941		hypothetical protein		[img|Ga0113560_11256||adenosylcobinamide-phosphate synthase|6.3.1.10][rast|416.8.peg.265||Adenosylcobinamide-phosphate synthase (EC 6.3.1.10)|6.3.1.10][proka|PROKKA_00253||cobalamin biosynthesis protein|]
pgap	AYM39_01225	280950	281525	-	4	girp	576	0		280950		hypothetical protein		[img|Ga0113560_11257||hypothetical protein|][rast|416.8.peg.266||Optional hypothetical component of the B12 transporter BtuM|][proka|PROKKA_00254||hypothetical protein|]
pgap	AYM39_01230	281544	283367	-	4	girp	1824	0		281544		TonB-dependent receptor		[img|Ga0113560_11258||vitamin B12 transporter|][rast|416.8.peg.267||Outer membrane vitamin B12 receptor BtuB|][proka|PROKKA_00255|btuB_2|Vitamin B12 transporter BtuB precursor|]
pgap	AYM39_01235	283847	284293	+	4	girp	447	0		284293		GCN5 family acetyltransferase		[img|Ga0113560_11259||AraC family transcriptional regulator, regulatory protein of adaptative response / methylated-DNA-[protein]-cysteine methyltransferase|2.1.1.63][rast|416.8.peg.268||GCN5-related N-acetyltransferase|][proka|PROKKA_00256||aminoalkylphosphonic acid N-acetyltransferase|]
pgap	AYM39_01240	284321	284566	-	4	girp	246	0		284321		ferredoxin		[img|Ga0113560_11260||4Fe-4S binding domain-containing protein|][rast|416.8.peg.269||4Fe-4S ferredoxin, iron-sulfur binding|][proka|PROKKA_00257|fdx|Ferredoxin|]
pgap	AYM39_01245	284569	285054	-	4	girp	486	0		284569		phosphopantetheine adenylyltransferase		[img|Ga0113560_11261||pantetheine-phosphate adenylyltransferase|2.7.7.3][rast|416.8.peg.270||Phosphopantetheine adenylyltransferase (EC 2.7.7.3)|2.7.7.3][proka|PROKKA_00258|coaD|Phosphopantetheine adenylyltransferase|2.7.7.3]
pgap	AYM39_01250	285080	285664	-	4	girp	585	0		285080		16S rRNA (guanine(966)-N(2))-methyltransferase RsmD		[img|Ga0113560_11262||16S rRNA (guanine966-N2)-methyltransferase|2.1.1.171][rast|416.8.peg.271||Ribosomal RNA small subunit methyltransferase D (EC 2.1.1.-)|][proka|PROKKA_00259|rsmD|Ribosomal RNA small subunit methyltransferase D|2.1.1.171]
pgap	AYM39_01255	285664	286962	-	4	girp	1299	0		285664		zinc protease		[img|Ga0113560_11263||zinc protease|3.4.24.-][rast|416.8.peg.272||FIG015287: Zinc protease|][proka|PROKKA_00260||Peptidase M16 inactive domain protein|]
pgap	AYM39_01260	286952	288322	-	4	girp	1371	0		286952		peptidase M16		[img|Ga0113560_11264||zinc protease|3.4.24.-][rast|416.8.peg.273||FIG015547: peptidase, M16 family|][proka|PROKKA_00261|ptrA|Protease 3 precursor|3.4.24.55]
pgap	AYM39_01265	288430	289320	+	4	girp	873.8	34.5		289320		protoheme IX farnesyltransferase		[img|Ga0113560_11265||protoheme IX farnesyltransferase|2.5.1.-][rast|416.8.peg.274||Heme O synthase, protoheme IX farnesyltransferase (EC 2.5.1.-) COX10-CtaB|][proka|PROKKA_00262|ctaB|Protoheme IX farnesyltransferase|2.5.1.-]
pgap	AYM39_01270	289317	290315	+	4	girp	999	0		290315		glycosyl transferase		[img|Ga0113560_11266||Anthranilate phosphoribosyltransferase|][rast|416.8.peg.275||Anthranilate phosphoribosyltransferase like (EC 2.4.2.18)|2.4.2.18][proka|PROKKA_00263|trpD_1|Anthranilate phosphoribosyltransferase|2.4.2.18]
pgap	AYM39_01275	290359	291591	+	4	girp	1233	0		291591		NAD(FAD)-utilizing dehydrogenase		[img|Ga0113560_11267||hypothetical protein|][rast|416.8.peg.276||NAD(FAD)-utilizing dehydrogenases|][proka|PROKKA_00264||glutamate synthase subunit beta|]
pgap	AYM39_01280	292181	293038	-	4	girp	918	41.6		292181		DNA methyltransferase		[img|Ga0113560_11268||DNA adenine methylase|2.1.1.72][rast|416.8.peg.277||DNA adenine methylase (EC 2.1.1.72)|2.1.1.72][proka|PROKKA_00265|dpnM|Modification methylase DpnIIA|2.1.1.72]
pgap	AYM39_01285	293381	294235	+	3	gip	675	155.9		294235		hypothetical protein		[img|Ga0113560_11269||hypothetical protein|][proka|PROKKA_00266||hypothetical protein|]
pgap	AYM39_01290	294613	294995	-	2	gr	287.5	135.1	pseudo	294613		[PSEUDO_pgap: transposase]		[rast|416.8.peg.278||Transposase|]
pgap	AYM39_01295	295122	295730	-	3	gip	609	0		295122		hypothetical protein		[img|Ga0113560_11270||F5/8 type C domain-containing protein|][proka|PROKKA_00267||hypothetical protein|]
pgap	AYM39_01300	296026	297216	+	4	girp	1191	0		297216		trans-2-enoyl-CoA reductase		[img|Ga0113560_11271||enoyl-[acyl-carrier protein] reductase / trans-2-enoyl-CoA reductase (NAD+)|1.3.1.9; 1.3.1.44][rast|416.8.peg.279||Short-chain alcohol dehydrogenase family|][proka|PROKKA_00268||Putative reductase/y4119/YP_4011|1.3.1.-]
pgap	AYM39_01305	297257	298243	-	4	girp	998.2	22.5		297257		transposase		[img|Ga0113560_11272||Transposase|][rast|416.8.peg.280||Mobile element protein|][proka|PROKKA_00269||Transposase IS116/IS110/IS902 family protein|]
pgap	AYM39_01310	298501	299508	+	4	girp	1008	0		299508	trpD	anthranilate phosphoribosyltransferase		[img|Ga0113560_11273||anthranilate phosphoribosyltransferase|2.4.2.18][rast|416.8.peg.281||Anthranilate phosphoribosyltransferase (EC 2.4.2.18)|2.4.2.18][proka|PROKKA_00270|trpD_2|Anthranilate phosphoribosyltransferase|2.4.2.18]
pgap	AYM39_01315	299587	299874	+	4	girp	288	0		299874		toxin		[img|Ga0113560_11274||hypothetical protein|][rast|416.8.peg.282||hypothetical protein|][proka|PROKKA_00271||hypothetical protein|]
pgap	AYM39_01320	299867	300190	+	4	girp	324	0		300190		hypothetical protein		[img|Ga0113560_11275||Predicted DNA binding protein, CopG/RHH family|][rast|416.8.peg.283||Conserved domain protein|][proka|PROKKA_00272||hypothetical protein|]
pgap	AYM39_01325	300318	301115	+	4	girp	798	0		301115	trpC	indole-3-glycerol-phosphate synthase		[img|Ga0113560_11276||indole-3-glycerol phosphate synthase|4.1.1.48][rast|416.8.peg.284||Indole-3-glycerol phosphate synthase (EC 4.1.1.48)|4.1.1.48][proka|PROKKA_00273|trpC|Indole-3-glycerol phosphate synthase|4.1.1.48]
pgap	AYM39_01330	301163	302149	+	4	girp	987	0		302149		choline kinase		[img|Ga0113560_11277||Ecdysteroid kinase|][rast|416.8.peg.285||FIG01199937: hypothetical protein|][proka|PROKKA_00274||Phosphotransferase enzyme family protein|]
pgap	AYM39_01335	302152	303048	+	4	girp	901.5	3		303048		inositol-phosphate phosphatase		[img|Ga0113560_11278||3'(2'), 5'-bisphosphate nucleotidase/myo-inositol-1(or 4)-monophosphatase|3.1.3.25; 3.1.3.7][rast|416.8.peg.286||Inositol-1-monophosphatase (EC 3.1.3.25)|3.1.3.25][proka|PROKKA_00275|suhB_1|Inositol-1-monophosphatase|3.1.3.25]
pgap	AYM39_01340	303342	304307	+	4	girp	966	0		304307		hypothetical protein		[img|Ga0113560_11279||Uncharacterized conserved protein YcbK, DUF882 family|][rast|416.8.peg.287||FIG001587: exported protein|][proka|PROKKA_00276||Peptidase M15|]
pgap	AYM39_01345	304378	306039	-	4	girp	1743	54		304378		hypothetical protein		[img|Ga0113560_11280||Murein L,D-transpeptidase YcbB/YkuD|][rast|416.8.peg.288||L,D-transpeptidase YcbB|][proka|PROKKA_00277||murein L,D-transpeptidase|]
pgap	AYM39_01350	306343	307065	-	4	girp	723	0		306343		hypothetical protein		[img|Ga0113560_11281||hypothetical protein|][rast|416.8.peg.289||hypothetical protein|][proka|PROKKA_00278||hypothetical protein|]
pgap	AYM39_01355	307222	310812	+	4	girp	3591	0		310812		5-oxoprolinase		[img|Ga0113560_11282||5-oxoprolinase (ATP-hydrolysing)|3.5.2.9][rast|416.8.peg.290||5-oxoprolinase (EC 3.5.2.9)|3.5.2.9][proka|PROKKA_00279|apc3|Acetophenone carboxylase gamma subunit|6.4.1.8]
pgap	AYM39_01360	310898	311290	+	4	girp	393	0		311290		thiol-disulfide oxidoreductase		[img|Ga0113560_11283||Predicted thiol-disulfide oxidoreductase YuxK, DCC family|][rast|416.8.peg.291||Protein of unknown function DUF393|][proka|PROKKA_00280||hypothetical protein|]
pgap	AYM39_01365	311322	311786	-	4	girp	465	0		311322		hypothetical protein		[img|Ga0113560_11284||hypothetical protein|][rast|416.8.peg.292||hypothetical protein|][proka|PROKKA_00281||hypothetical protein|]
pgap	AYM39_01370	312097	312483	-	4	girp	387	0		312097	hisI	phosphoribosyl-AMP cyclohydrolase		[img|Ga0113560_11285||phosphoribosyl-AMP cyclohydrolase|3.5.4.19][rast|416.8.peg.293||Phosphoribosyl-AMP cyclohydrolase (EC 3.5.4.19)|3.5.4.19][proka|PROKKA_00282||phosphoribosyl-AMP cyclohydrolase|]
pgap	AYM39_01375	312480	313253	-	4	girp	774	0		312480		imidazole glycerol phosphate synthase cyclase subunit		[img|Ga0113560_11286|hisF|cyclase|4.1.3.-][rast|416.8.peg.294||Imidazole glycerol phosphate synthase cyclase subunit (EC 4.1.3.-)|][proka|PROKKA_00283|hisF|Imidazole glycerol phosphate synthase subunit HisF|4.1.3.-]
pgap	AYM39_01380	313267	314010	-	4	girp	728.2	31.5		313267		1-(5-phosphoribosyl)-5-((5- phosphoribosylamino)methylideneamino)imidazole-4- carboxamide isomerase		[img|Ga0113560_11287||phosphoribosylformimino-5-aminoimidazole carboxamide ribotide isomerase|5.3.1.16][rast|416.8.peg.295||Phosphoribosylformimino-5-aminoimidazole carboxamide ribotide isomerase (EC 5.3.1.16)|5.3.1.16][proka|PROKKA_00284|hisA|1-(5-phosphoribosyl)-5-[(5- phosphoribosylamino)methylideneamino] imidazole-4-carboxamide isomerase|5.3.1.16]
pgap	AYM39_01385	314078	314719	-	4	girp	642	0		314078	hisH	imidazole glycerol phosphate synthase subunit HisH		[img|Ga0113560_11288||glutamine amidotransferase|2.4.2.-][rast|416.8.peg.296||Imidazole glycerol phosphate synthase amidotransferase subunit (EC 2.4.2.-)|][proka|PROKKA_00285|hisH1|Imidazole glycerol phosphate synthase subunit HisH 1|2.4.2.-]
pgap	AYM39_01390	314768	315361	-	4	girp	594	0		314768		imidazoleglycerol-phosphate dehydratase		[img|Ga0113560_11289|hisB|imidazoleglycerol-phosphate dehydratase|4.2.1.19][rast|416.8.peg.297||Imidazoleglycerol-phosphate dehydratase (EC 4.2.1.19)|4.2.1.19][proka|PROKKA_00286|hisB|Imidazoleglycerol-phosphate dehydratase|4.2.1.19]
pgap	AYM39_01395	315410	318052	-	4	girp	2643	0		315410	pepN	aminopeptidase N		[img|Ga0113560_11290||aminopeptidase N|3.4.11.2][rast|416.8.peg.298||Membrane alanine aminopeptidase N (EC 3.4.11.2)|3.4.11.2][proka|PROKKA_00287|pepN|Aminopeptidase N|3.4.11.2]
pgap	AYM39_01400	318056	318502	-	4	girp	510	42		318056		hypothetical protein		[img|Ga0113560_11291||Uncharacterized membrane protein, DUF373 family|][rast|416.8.peg.299||Protoporphyrinogen IX oxidase, novel form, HemJ (EC 1.3.-.-)|][proka|PROKKA_00288||Phosphate-starvation-inducible E|]
pgap	AYM39_01405	318600	318959	-	4	girp	360	0		318600		hypothetical protein		[img|Ga0113560_11292||Uncharacterized membrane protein YgdD, TMEM256/DUF423 family|][rast|416.8.peg.300||COG2363|][proka|PROKKA_00289||hypothetical protein|]
pgap	AYM39_01410	318959	319480	-	4	girp	522	0		318959		molybdenum cofactor biosynthesis protein		[img|Ga0113560_11293||molybdenum cofactor biosynthesis protein B|][rast|416.8.peg.301||Molybdenum cofactor biosynthesis protein MoaB|][proka|PROKKA_00290|moaB|Molybdenum cofactor biosynthesis protein B|]
pgap	AYM39_01415	319635	320699	+	4	girp	1065	0		320699		hypothetical protein		[img|Ga0113560_11294||Predicted PurR-regulated permease PerM|][rast|416.8.peg.302||Putative membrane protein|][proka|PROKKA_00291||putative inner membrane protein|]
pgap	AYM39_01420	320730	322088	-	4	girp	1375.5	33		320730		cytochrome P450		[img|Ga0113560_11295||Cytochrome P450|][rast|416.8.peg.303||Cytochrome P450 family protein|][proka|PROKKA_00292||Epi-isozizaene 5-monooxygenase/(E)-beta-farnesene synthase|1.14.13.106]
pgap	AYM39_01425	322205	323176	-	4	girp	972	0		322205		hypothetical protein		[img|Ga0113560_11296||Nitrate and nitrite sensing|][rast|416.8.peg.304||Membrane-associated methyl-accepting chemotaxis protein with HAMP domain|][proka|PROKKA_00293||Nitrate and nitrite sensing|]
pgap	AYM39_01430	323188	324369	-	4	girp	1182	0		323188		chemotaxis protein		[img|Ga0113560_11297||methyl-accepting chemotaxis protein|][rast|416.8.peg.305||Methyl-accepting chemotaxis protein|][proka|PROKKA_00294|ctpH|Methyl-accepting chemotaxis protein CtpH|]
pgap	AYM39_01440	324562	327675	-	4	girp	3114	0		324562		RND transporter		[img|Ga0113560_11298||Multidrug efflux pump subunit AcrB|][rast|416.8.peg.306||Cobalt-zinc-cadmium resistance protein CzcA; Cation efflux system protein CusA|][proka|PROKKA_00295|mdtB_1|Multidrug resistance protein MdtB|]
pgap	AYM39_01435	324368	324577	+	1	g	210	0		324577		hypothetical protein
pgap	AYM39_01445	327672	328784	-	4	girp	1113	0		327672		efflux transporter periplasmic adaptor subunit		[img|Ga0113560_11299||RND family efflux transporter, MFP subunit|][rast|416.8.peg.307||Secretion protein HlyD precursor|][proka|PROKKA_00296|ttgA_1|Toluene efflux pump periplasmic linker protein TtgA precursor|]
pgap	AYM39_01450	328781	330313	-	4	girp	1533	0		328781		RND transporter		[img|Ga0113560_11300||efflux transporter, outer membrane factor (OMF) lipoprotein, NodT family|][rast|416.8.peg.308||RND efflux system, outer membrane lipoprotein, NodT family|][proka|PROKKA_00297|ttgI_2|Toluene efflux pump outer membrane protein TtgI precursor|]
pgap	AYM39_01455	330303	330971	-	4	girp	669	0		330303		TetR family transcriptional regulator		[img|Ga0113560_11301||DNA-binding transcriptional regulator, AcrR family|][rast|416.8.peg.309||Transcriptional regulator, TetR family|][proka|PROKKA_00298|yttP|putative HTH-type transcriptional regulator YttP|]
pgap	AYM39_01460	331351	332211	-	4	girp	861	0		331351	ubiA	4-hydroxybenzoate octaprenyltransferase		[img|Ga0113560_11302||4-hydroxybenzoate polyprenyltransferase|2.5.1.39][rast|416.8.peg.310||4-hydroxybenzoate polyprenyltransferase (EC 2.5.1.39)|2.5.1.39][proka|PROKKA_00299|ubiA|4-hydroxybenzoate octaprenyltransferase|2.5.1.-]
pgap	AYM39_01465	332462	333376	+	4	girp	1059	96		333376		glycine--tRNA ligase subunit alpha		[img|Ga0113560_11303|glyQ|glycyl-tRNA synthetase alpha chain|6.1.1.14][rast|416.8.peg.311||Glycyl-tRNA synthetase alpha chain (EC 6.1.1.14)|6.1.1.14][proka|PROKKA_00300|glyQ|Glycine--tRNA ligase alpha subunit|6.1.1.14]
pgap	AYM39_01470	333379	335448	+	4	girp	2070	0		335448	glyS	glycine--tRNA ligase subunit beta		[img|Ga0113560_11304||glycyl-tRNA synthetase beta chain|6.1.1.14][rast|416.8.peg.312||Glycyl-tRNA synthetase beta chain (EC 6.1.1.14)|6.1.1.14][proka|PROKKA_00301|glyS|Glycine--tRNA ligase beta subunit|6.1.1.14]
pgap	AYM39_01475	335445	335987	+	4	girp	539.2	7.5		335987		histidinol-phosphatase		[img|Ga0113560_11305||D-glycero-D-manno-heptose 1,7-bisphosphate phosphatase|3.1.3.83; 3.1.3.82][rast|416.8.peg.313||Histidinol-phosphatase (EC 3.1.3.15)|3.1.3.15][proka|PROKKA_00302||D-glycero-beta-D-manno-heptose-1,7-bisphosphate 7-phosphatase|3.1.3.82]
pgap	AYM39_01480	335953	336711	+	4	girp	743.2	31.5		336711		acyl-phosphate glycerol 3-phosphate acyltransferase		[img|Ga0113560_11306||1-acyl-sn-glycerol-3-phosphate acyltransferase|2.3.1.51][rast|416.8.peg.314||1-acyl-sn-glycerol-3-phosphate acyltransferase (EC 2.3.1.51)|2.3.1.51][proka|PROKKA_00303|plsC|1-acyl-sn-glycerol-3-phosphate acyltransferase|2.3.1.51]
img	Ga0113560_11307	336778	336900	-	3	irp	123	0		336778		hypothetical protein		[rast|416.8.peg.315||hypothetical protein|][proka|PROKKA_00304||hypothetical protein|]
img	Ga0113560_11308	337085	337222	-	2	ip	138	0		337085		hypothetical protein		[proka|PROKKA_00305||hypothetical protein|]
pgap	AYM39_01485	337323	339230	-	4	girp	1908	0		337323		thiol-disulfide oxidoreductase		[img|Ga0113560_11309||Predicted thiol-disulfide oxidoreductase YuxK, DCC family|][rast|416.8.peg.316||membrane protein, putative|][proka|PROKKA_00306||hypothetical protein|]
img	Ga0113560_11310	339374	339502	-	3	irp	129	0		339374		hypothetical protein		[rast|416.8.peg.317||hypothetical protein|][proka|PROKKA_00307||hypothetical protein|]
pgap	AYM39_01490	339712	340134	+	4	girp	423	0		340134		hypothetical protein		[img|Ga0113560_11311||hypothetical protein|][rast|416.8.peg.318||hypothetical protein|][proka|PROKKA_00308||hypothetical protein|]
pgap	AYM39_01495	340186	340377	-	4	girp	195	6		340186		hypothetical protein		[img|Ga0113560_11312||Protein of unknown function (DUF2970)|][rast|416.8.peg.319||uncharacterized conserved membrane protein|][proka|PROKKA_00309||hypothetical protein|]
pgap	AYM39_01500	340455	344126	+	4	girp	3622.5	33.3		344126		methionine synthase		[img|Ga0113560_11313||5-methyltetrahydrofolate--homocysteine methyltransferase|2.1.1.13][rast|416.8.peg.320||5-methyltetrahydrofolate--homocysteine methyltransferase (EC 2.1.1.13)|2.1.1.13][proka|PROKKA_00310|metH|Methionine synthase|2.1.1.13]
pgap	AYM39_01505	344166	344402	+	4	girp	237	0		344402		hypothetical protein		[img|Ga0113560_11314||Glutaredoxin-like domain (DUF836)|][rast|416.8.peg.321||hypothetical protein|][proka|PROKKA_00311||hypothetical protein|]
pgap	AYM39_01510	344419	345108	-	4	girp	690	0		344419		tRNA (guanine-N7)-methyltransferase		[img|Ga0113560_11315||tRNA (guanine-N7-)-methyltransferase|2.1.1.33][rast|416.8.peg.322||tRNA (guanine46-N7-)-methyltransferase (EC 2.1.1.33)|2.1.1.33][proka|PROKKA_00312|trmB|tRNA (guanine-N(7)-)-methyltransferase|2.1.1.33]
pgap	AYM39_01515	345211	346350	-	4	girp	1140	0		345211		hypothetical protein		[img|Ga0113560_11316||hypothetical protein|][rast|416.8.peg.323||hypothetical protein|][proka|PROKKA_00313||hypothetical protein|]
pgap	AYM39_01520	346541	346987	-	4	girp	447	0		346541		hypothetical protein		[img|Ga0113560_11317||hypothetical protein|][rast|416.8.peg.324||Putative activity regulator of membrane protease YbbK|][proka|PROKKA_00314|ybbJ|Inner membrane protein YbbJ|]
pgap	AYM39_01525	346990	347910	-	4	girp	921	0		346990		protease		[img|Ga0113560_11318||Regulator of protease activity HflC, stomatin/prohibitin superfamily|][rast|416.8.peg.325||Putative stomatin/prohibitin-family membrane protease subunit YbbK|][proka|PROKKA_00315|hflK_1|Modulator of FtsH protease HflK|]
pgap	AYM39_01530	348013	348276	+	4	girp	264	0		348276		hypothetical protein		[img|Ga0113560_11319||hypothetical protein|][rast|416.8.peg.326||hypothetical protein|][proka|PROKKA_00316||hypothetical protein|]
pgap	AYM39_01535	348285	350267	-	4	girp	1942.5	31.9		348285		transglutaminase		[img|Ga0113560_11320||protein of unknown function (DUF4129)|][rast|416.8.peg.327||FIG001454: Transglutaminase-like enzymes, putative cysteine proteases|][proka|PROKKA_00317|tgpA_1|Protein-glutamine gamma-glutamyltransferase|2.3.2.13]
pgap	AYM39_01540	350240	351190	-	4	girp	923.2	55.5		350240		hypothetical protein		[img|Ga0113560_11321||Uncharacterized conserved protein, DUF58 family, contains vWF domain|][rast|416.8.peg.328||FIG002343: hypothetical protein|][proka|PROKKA_00318||hypothetical protein|]
pgap	AYM39_01545	351187	352092	-	4	girp	906	0		351187		AAA family ATPase		[img|Ga0113560_11322||MoxR-like ATPase|3.6.3.-][rast|416.8.peg.329||FIG022979: MoxR-like ATPases|][proka|PROKKA_00319||ATPase family associated with various cellular activities (AAA)|]
pgap	AYM39_01550	352229	352570	+	4	girp	342	0		352570		conjugal transfer protein TraR		[img|Ga0113560_11323||RNA polymerase-binding transcription factor DksA|][rast|416.8.peg.330||DnaK suppressor protein|][proka|PROKKA_00320|dksA_1|RNA polymerase-binding transcription factor DksA|]
pgap	AYM39_01555	352663	353274	-	4	girp	612	0		352663		YihA family ribosome biogenesis GTP-binding protein		[img|Ga0113560_11324||GTP-binding protein|][rast|416.8.peg.331||GTP-binding protein EngB|][proka|PROKKA_00321|engB|putative GTP-binding protein EngB|]
pgap	AYM39_01560	353385	354062	+	4	girp	678	0		354062		cytochrome C		[img|Ga0113560_11325||Cytochrome c553|][rast|416.8.peg.332||Cytochrome c4|][proka|PROKKA_00322|cc4_1|Cytochrome c4 precursor|]
pgap	AYM39_01565	354277	354882	+	4	girp	606	0		354882		disulfide bond formation protein DsbA		[img|Ga0113560_11326||thiol:disulfide interchange protein DsbA|][rast|416.8.peg.334||Periplasmic thiol:disulfide interchange protein DsbA|][proka|PROKKA_00323|dsbA|Thiol:disulfide interchange protein DsbA precursor|]
pgap	AYM39_01570	355004	356542	+	4	girp	1539	0		356542		diguanylate cyclase		[img|Ga0113560_11327||diguanylate cyclase|][rast|416.8.peg.335||diguanylate cyclase/phosphodiesterase (GGDEF & EAL domains) with PAS/PAC sensor(s)|][proka|PROKKA_00324|pleD_1|Response regulator PleD|]
pgap	AYM39_01575	356554	357876	+	4	girp	1323	0		357876		diguanylate cyclase		[img|Ga0113560_11328||diguanylate cyclase|][rast|416.8.peg.336||diguanylate cyclase/phosphodiesterase (GGDEF & EAL domains) with PAS/PAC sensor(s)|][proka|PROKKA_00325|dosC_1|Diguanylate cyclase DosC|2.7.7.65]
pgap	AYM39_01580	357933	358616	-	4	girp	675	18		357933		hypothetical protein		[img|Ga0113560_11329||hypothetical protein|][rast|416.8.peg.337||hypothetical protein|][proka|PROKKA_00326||hypothetical protein|]
pgap	AYM39_01585	358850	360550	-	4	girp	1694.2	13.5		358850		exo-beta-1,3-glucanase		[img|Ga0113560_11330||Exo-beta-1,3-glucanase, GH17 family|][rast|416.8.peg.338||putative beta (1-6) glucans synthase|][proka|PROKKA_00327||Glycosyl hydrolases family 17|]
pgap	AYM39_01590	360808	362535	+	4	girp	1719	18		362535		copper oxidase		[img|Ga0113560_11331||Multicopper oxidase|][rast|416.8.peg.339||Multicopper oxidase|][proka|PROKKA_00328|copA_1|Copper resistance protein A precursor|]
pgap	AYM39_01595	362596	364248	-	4	girp	1644	18		362596		bilirubin oxidase		[img|Ga0113560_11332||Multicopper oxidase with three cupredoxin domains (includes cell division protein FtsP and spore coat protein CotA)|][rast|416.8.peg.340||Multicopper oxidase|][proka|PROKKA_00329|cueO_1|Blue copper oxidase CueO precursor|]
pgap	AYM39_01600	364490	367126	+	4	girp	2637	0		367126		hypothetical protein		[img|Ga0113560_11333||hypothetical protein|][rast|416.8.peg.342||INTEGRAL MEMBRANE PROTEIN (Rhomboid family)|][proka|PROKKA_00330||hypothetical protein|]
pgap	AYM39_01605	367149	367592	-	4	girp	446.2	1.5		367149		regulator		[img|Ga0113560_11334||regulator of sigma D|][rast|416.8.peg.343||Regulator of sigma D|][proka|PROKKA_00331|rsd|Regulator of sigma D|]
pgap	AYM39_01610	367694	368512	+	4	girp	777.8	82.5		368512		hypothetical protein		[img|Ga0113560_11335||hypothetical protein|][rast|416.8.peg.344||Spore photoproduct|][proka|PROKKA_00332||hypothetical protein|]
pgap	AYM39_01615	368587	368973	-	4	girp	387	0		368587		hypothetical protein		[img|Ga0113560_11336||hypothetical protein|][rast|416.8.peg.345||hypothetical protein|][proka|PROKKA_00333||hypothetical protein|]
pgap	AYM39_01620	369126	369959	-	4	girp	834	0		369126		oxidoreductase		[img|Ga0113560_11337||Short-chain dehydrogenase|][rast|416.8.peg.346||Putative NAD(P)-dependent oxidoreductase EC-YbbO|][proka|PROKKA_00334||Sepiapterin reductase|1.1.1.325]
pgap	AYM39_01625	369956	370546	-	4	girp	591	0		369956		hypothetical protein		[img|Ga0113560_11338||protein of unknown function (DUF4124)|][rast|416.8.peg.347||hypothetical protein|][proka|PROKKA_00335||hypothetical protein|]
pgap	AYM39_01630	370626	373724	+	4	girp	3099	0		373724		exodeoxyribonuclease V subunit gamma		[img|Ga0113560_11339||exodeoxyribonuclease V gamma subunit|3.1.11.5][rast|416.8.peg.348||Exodeoxyribonuclease V gamma chain (EC 3.1.11.5)|3.1.11.5][proka|PROKKA_00336|recC_1|RecBCD enzyme subunit RecC|3.1.11.5]
pgap	AYM39_01635	373714	377229	+	4	girp	3516	0		377229		exodeoxyribonuclease V subunit beta		[img|Ga0113560_11340||exodeoxyribonuclease V beta subunit|3.1.11.5][rast|416.8.peg.349||Exodeoxyribonuclease V beta chain (EC 3.1.11.5)|3.1.11.5][proka|PROKKA_00337|recB_1|RecBCD enzyme subunit RecB|3.1.11.5]
pgap	AYM39_01640	377426	377656	-	2	gr	193.5	53		377426		hypothetical protein		[rast|416.8.peg.350||hypothetical protein|]
pgap	AYM39_01645	377921	378751	+	4	girp	831	0		378751		hypothetical protein		[img|Ga0113560_11342||hypothetical protein|][rast|416.8.peg.351||hypothetical protein|][proka|PROKKA_00338||hypothetical protein|]
pgap	AYM39_01650	378829	379617	+	4	girp	790.5	1.7		379617		hypothetical protein		[img|Ga0113560_11343||hypothetical protein|][rast|416.8.peg.352||hypothetical protein|][proka|PROKKA_00339||hypothetical protein|]
pgap	AYM39_01655	379614	381296	+	4	girp	1683	0		381296		hypothetical protein		[img|Ga0113560_11344||hypothetical protein|][rast|416.8.peg.353||hypothetical protein|][proka|PROKKA_00340||BNR/Asp-box repeat protein|]
pgap	AYM39_01660	381315	381893	+	4	girp	579	0		381893		hypothetical protein		[img|Ga0113560_11345||hypothetical protein|][rast|416.8.peg.354||hypothetical protein|][proka|PROKKA_00341||hypothetical protein|]
pgap	AYM39_01665	381939	382244	+	1	g	306	0		382244		hypothetical protein
pgap	AYM39_01670	382445	383209	+	4	girp	765	0		383209		hypothetical protein		[img|Ga0113560_11346||PEP-CTERM protein-sorting domain-containing protein|][rast|416.8.peg.355||hypothetical protein|][proka|PROKKA_00342||hypothetical protein|]
pgap	AYM39_01675	383335	384168	+	4	girp	834	0		384168		hypothetical protein		[img|Ga0113560_11347||PEP-CTERM protein-sorting domain-containing protein|][rast|416.8.peg.356||Alkaline phosphatase (EC 3.1.3.1)|3.1.3.1][proka|PROKKA_00343||hypothetical protein|]
pgap	AYM39_01680	384293	386503	+	4	girp	2199.8	22.5		386503		cytochrome-c peroxidase		[img|Ga0113560_11348||Di-haem cytochrome c peroxidase|][rast|416.8.peg.357||Methylamine utilization protein mauG|][proka|PROKKA_00344|ccp_1|Cytochrome c551 peroxidase precursor|1.11.1.5]
pgap	AYM39_01685	387301	387954	-	3	gip	654	0		387301		hypothetical protein		[img|Ga0113560_11349||hypothetical protein|][proka|PROKKA_00345||hypothetical protein|]
pgap	AYM39_01690	387960	388526	-	3	gip	631	55.4		387960		hypothetical protein		[img|Ga0113560_11350||hypothetical protein|][proka|PROKKA_00346||hypothetical protein|]
pgap	AYM39_01695	388625	389443	-	3	gip	819	0		388625		hypothetical protein		[img|Ga0113560_11351||TIGR04255 family protein|][proka|PROKKA_00347||hypothetical protein|]
pgap	AYM39_01700	389967	391832	+	4	girp	1866	0		391832		hypothetical protein		[img|Ga0113560_11352||Zn-dependent protease with chaperone function|][rast|416.8.peg.360||hypothetical protein|][proka|PROKKA_00348|htpX_1|Protease HtpX|]
pgap	AYM39_01705	391974	393860	+	4	girp	1887	0		393860		ABC transporter ATP-binding protein		[img|Ga0113560_11353||ATP-binding cassette, subfamily F, member 3|][rast|416.8.peg.362||Glutathione-regulated potassium-efflux system ATP-binding protein|][proka|PROKKA_00349|yheS_1|putative ABC transporter ATP-binding protein YheS|]
pgap	AYM39_01710	393863	394369	+	4	girp	507	0		394369		hypothetical protein		[img|Ga0113560_11354||hypothetical protein|][rast|416.8.peg.363||hypothetical protein|][proka|PROKKA_00350||hypothetical protein|]
pgap	AYM39_01715	394383	394826	+	4	girp	444	0		394826		universal stress protein A		[img|Ga0113560_11355||universal stress protein A|][rast|416.8.peg.364||Universal stress protein family COG0589|][proka|PROKKA_00351||hypothetical protein|]
pgap	AYM39_01720	394819	395346	+	4	girp	528	0		395346		bifunctional adenosylcobinamide kinase/adenosylcobinamide-phosphate guanylyltransferase		[img|Ga0113560_11356||adenosylcobinamide kinase / adenosylcobinamide-phosphate guanylyltransferase|2.7.7.62; 2.7.1.156][rast|416.8.peg.365||Adenosylcobinamide-phosphate guanylyltransferase (EC 2.7.7.62)|2.7.7.62][proka|PROKKA_00352|cobP|Bifunctional adenosylcobalamin biosynthesis protein CobP|2.7.1.156]
pgap	AYM39_01725	395355	396395	+	4	girp	1041	0		396395		nicotinate-nucleotide--dimethylbenzimidazole phosphoribosyltransferase		[img|Ga0113560_11357||nicotinate-nucleotide--dimethylbenzimidazole phosphoribosyltransferase|2.4.2.21][rast|416.8.peg.366||Nicotinate-nucleotide--dimethylbenzimidazole phosphoribosyltransferase (EC 2.4.2.21)|2.4.2.21][proka|PROKKA_00353|cobT|Nicotinate-nucleotide--dimethylbenzimidazole phosphoribosyltransferase|2.4.2.21]
pgap	AYM39_01730	396526	396939	+	4	girp	433.5	39		396939		hypothetical protein		[img|Ga0113560_11358||TM2 domain-containing protein|][rast|416.8.peg.367||hypothetical protein|][proka|PROKKA_00354||TM2 domain protein|]
pgap	AYM39_01735	396942	397664	+	4	girp	723	0		397664		cobalamin synthase		[img|Ga0113560_11359||adenosylcobinamide-GDP ribazoletransferase|2.7.8.26][rast|416.8.peg.368||Cobalamin synthase|][proka|PROKKA_00355|cobS_1|Cobalamin synthase|2.-.-.-]
pgap	AYM39_01740	397661	398317	+	4	girp	657	0		398317		5,6-dimethylbenzimidazole synthase		[img|Ga0113560_11360||5,6-dimethylbenzimidazole synthase|1.13.11.79][rast|416.8.peg.369||Cobalamin biosynthesis protein BluB @ 5,6-dimethylbenzimidazole synthase, flavin destructase family|][proka|PROKKA_00356|bluB|5,6-dimethylbenzimidazole synthase|1.13.11.79]
pgap	AYM39_01750	399780	404408	-	4	girp	4629	0		399780		diguanylate cyclase		[img|Ga0113560_11362||PAS domain S-box-containing protein/diguanylate cyclase (GGDEF) domain-containing protein|][rast|416.8.peg.371||diguanylate cyclase/phosphodiesterase (GGDEF & EAL domains) with PAS/PAC sensor(s)|][proka|PROKKA_00358|gmr_3|Cyclic di-GMP phosphodiesterase Gmr|3.1.4.52]
pgap	AYM39_01745	398307	399791	+	3	gir	1485	0		399791		cobyric acid synthase		[img|Ga0113560_11361||adenosylcobyric acid synthase|6.3.5.10][rast|416.8.peg.370||Cobyric acid synthase (EC 6.3.5.10)|6.3.5.10]
pgap	AYM39_01755	404474	405169	-	4	girp	689.2	38.4		404474		hypothetical protein		[img|Ga0113560_11363||hypothetical protein|][rast|416.8.peg.372||hypothetical protein|][proka|PROKKA_00359||hypothetical protein|]
pgap	AYM39_01760	405224	405697	-	4	girp	474	0		405224		CYTH domain protein		[img|Ga0113560_11364||adenylate cyclase|4.6.1.1][rast|416.8.peg.373||Adenylate cyclase (EC 4.6.1.1)|4.6.1.1][proka|PROKKA_00360||CYTH domain protein|]
pgap	AYM39_01765	405863	406342	-	4	girp	480	0		405863		signal peptidase II		[img|Ga0113560_11365||signal peptidase II|3.4.23.36][rast|416.8.peg.374||Lipoprotein signal peptidase (EC 3.4.23.36)|3.4.23.36][proka|PROKKA_00361|lspA|Lipoprotein signal peptidase|3.4.23.36]
pgap	AYM39_01770	406335	409166	-	4	girp	2832	0		406335	ileS	isoleucine--tRNA ligase		[img|Ga0113560_11366|ileS|isoleucyl-tRNA synthetase|6.1.1.5][rast|416.8.peg.375||Isoleucyl-tRNA synthetase (EC 6.1.1.5)|6.1.1.5][proka|PROKKA_00362|ileS|Isoleucine--tRNA ligase|6.1.1.5]
pgap	AYM39_01775	409393	409602	-	4	girp	210	0		409393		hypothetical protein		[img|Ga0113560_11367||hypothetical protein|][rast|416.8.peg.377||hypothetical protein|][proka|PROKKA_00363||hypothetical protein|]
pgap	AYM39_01780	409712	410314	+	4	girp	603	0		410314		nitroreductase		[img|Ga0113560_11368||Nitroreductase|][rast|416.8.peg.379||nitroreductase|][proka|PROKKA_00364||malonic semialdehyde reductase|]
pgap	AYM39_01785	410349	411722	+	4	girp	1374	0		411722		hypothetical protein		[img|Ga0113560_11369||PAS domain S-box-containing protein/diguanylate cyclase (GGDEF) domain-containing protein|][rast|416.8.peg.380||diguanylate cyclase/phosphodiesterase (GGDEF & EAL domains) with PAS/PAC sensor(s)|][proka|PROKKA_00365|dosC_2|Diguanylate cyclase DosC|2.7.7.65]
pgap	AYM39_01790	411728	412765	-	4	girp	1056	12		411728		hypothetical protein		[img|Ga0113560_11370||TIGR03790 family protein|][rast|416.8.peg.381||FIG00861086: hypothetical protein|][proka|PROKKA_00366||hypothetical protein|]
pgap	AYM39_01795	412880	413074	-	1	g	195	0		412880		hypothetical protein
pgap	AYM39_01800	413105	414625	+	4	girp	1521	0		414625		fumarate hydratase		[img|Ga0113560_11371||fumarate hydratase, class I|4.2.1.2][rast|416.8.peg.382||Fumarate hydratase class I, aerobic (EC 4.2.1.2)|4.2.1.2][proka|PROKKA_00367|fumB|Fumarate hydratase class I, anaerobic|4.2.1.2]
pgap	AYM39_01805	414830	416233	+	4	girp	1404	0		416233		transporter		[img|Ga0113560_11372||efflux transporter, outer membrane factor (OMF) lipoprotein, NodT family|][rast|416.8.peg.383||RND efflux system, outer membrane lipoprotein, NodT family|][proka|PROKKA_00368|ttgF_1|Toluene efflux pump outer membrane protein TtgF precursor|]
pgap	AYM39_01810	416230	417396	+	4	girp	1167	0		417396		efflux transporter periplasmic adaptor subunit		[img|Ga0113560_11373||RND family efflux transporter, MFP subunit|][rast|416.8.peg.384||Membrane fusion protein of RND family multidrug efflux pump|][proka|PROKKA_00369|mexA_1|Multidrug resistance protein MexA precursor|]
pgap	AYM39_01815	417393	420497	+	4	girp	3105	0		420497		acriflavin resistance protein		[img|Ga0113560_11374||Multidrug efflux pump subunit AcrB|][rast|416.8.peg.385||Acriflavin resistance protein|][proka|PROKKA_00370|czcA_1|Cobalt-zinc-cadmium resistance protein CzcA|]
pgap	AYM39_01820	420651	420968	+	3	gip	318	0		420968		hypothetical protein		[img|Ga0113560_11375||hypothetical protein|][proka|PROKKA_00371||hypothetical protein|]
pgap	AYM39_01825	420992	421786	+	3	gip	795	0		421786		hypothetical protein		[img|Ga0113560_11376||hypothetical protein|][proka|PROKKA_00372||hypothetical protein|]
pgap	AYM39_01830	422099	422344	+	3	gip	246	0		422344		hypothetical protein		[img|Ga0113560_11377||hypothetical protein|][proka|PROKKA_00373||hypothetical protein|]
pgap	AYM39_01835	422982	423224	-	4	girp	243	0		422982		hypothetical protein		[img|Ga0113560_11378||hypothetical protein|][rast|416.8.peg.386||hypothetical protein|][proka|PROKKA_00374||hypothetical protein|]
pgap	AYM39_01840	423347	423883	-	4	girp	537	0		423347		molecular chaperone DnaJ		[img|Ga0113560_11379||hypothetical protein|][rast|416.8.peg.387||heat shock protein DnaJ domain protein|][proka|PROKKA_00375||DnaJ domain protein|]
pgap	AYM39_01845	423935	424225	+	1	g	291	0		424225		hypothetical protein
pgap	AYM39_01850	424282	426291	+	4	girp	2010	0		426291		ATP-dependent DNA helicase Rep		[img|Ga0113560_11380||ATP-dependent DNA helicase Rep|3.6.4.12][rast|416.8.peg.388||ATP-dependent DNA helicase Rep|][proka|PROKKA_00376|rep|ATP-dependent DNA helicase Rep|3.6.4.12]
pgap	AYM39_01855	426295	427644	-	4	girp	1343.2	4.5		426295		serine endoprotease DegQ		[img|Ga0113560_11381||serine protease Do/serine protease DegQ|3.4.21.-; 3.4.21.107][rast|416.8.peg.389||HtrA protease/chaperone protein / Serine protease (Protease DO) (EC 3.4.21.-)|][proka|PROKKA_00377|degQ_1|Periplasmic pH-dependent serine endoprotease DegQ precursor|3.4.21.107]
pgap	AYM39_01860	427785	429128	+	4	girp	1344	0		429128		Crp/Fnr family transcriptional regulator		[img|Ga0113560_11382||Rhodanese-like domain-containing protein|][rast|416.8.peg.390||cAMP-binding proteins - catabolite gene activator and regulatory subunit of cAMP-dependent protein kinases|][proka|PROKKA_00378||Cyclic nucleotide-gated potassium channel|]
pgap	AYM39_01865	429166	429321	-	4	girp	156	0		429166	rpmG	50S ribosomal protein L33		[img|Ga0113560_11383|rpmG|large subunit ribosomal protein L33|][rast|416.8.peg.391||LSU ribosomal protein L33p @ LSU ribosomal protein L33p, zinc-independent|][proka|PROKKA_00379|rpmG|50S ribosomal protein L33|]
pgap	AYM39_01870	429333	429569	-	4	girp	221.2	31.5		429333	rpmB	50S ribosomal protein L28		[img|Ga0113560_11384|rpmB|large subunit ribosomal protein L28|][rast|416.8.peg.392||LSU ribosomal protein L28p|][proka|PROKKA_00380|rpmB|50S ribosomal protein L28|]
pgap	AYM39_01875	429708	430658	+	4	girp	951	0		430658		glutathione synthetase		[img|Ga0113560_11385||glutathione synthase|6.3.2.3][rast|416.8.peg.393||Glutathione synthetase (EC 6.3.2.3)|6.3.2.3][proka|PROKKA_00381|gshB|Glutathione synthetase|6.3.2.3]
pgap	AYM39_01880	430660	431553	+	4	girp	894	0		431553		energy transducer TonB		[img|Ga0113560_11386||protein TonB|][rast|416.8.peg.394||TonB protein|][proka|PROKKA_00382||Gram-negative bacterial tonB protein|]
pgap	AYM39_01885	431570	432136	+	4	girp	570	6		432136		hypothetical protein		[img|Ga0113560_11387||putative transcriptional regulator|][rast|416.8.peg.395||UPF0301 protein YqgE|][proka|PROKKA_00383||hypothetical protein|]
pgap	AYM39_01890	432129	432575	+	4	girp	447	0		432575		Holliday junction resolvase		[img|Ga0113560_11388||putative holliday junction resolvase|3.1.-][rast|416.8.peg.396||Putative Holliday junction resolvase YggF|][proka|PROKKA_00384|yqgF|Putative Holliday junction resolvase|3.1.-.-]
pgap	AYM39_01895	432648	433169	+	4	girp	518.2	7.5		433169		bifunctional pyr operon transcriptional regulator/uracil phosphoribosyltransferase		[img|Ga0113560_11389||pyrimidine operon attenuation protein / uracil phosphoribosyltransferase|2.4.2.9][rast|416.8.peg.397||Uracil phosphoribosyltransferase (EC 2.4.2.9) / Pyrimidine operon regulatory protein PyrR|2.4.2.9][proka|PROKKA_00385|pyrR|Bifunctional protein PyrR|]
pgap	AYM39_01900	433166	434128	+	4	girp	963	0		434128	pyrB	aspartate carbamoyltransferase catalytic subunit		[img|Ga0113560_11390||aspartate carbamoyltransferase catalytic subunit|2.1.3.2][rast|416.8.peg.398||Aspartate carbamoyltransferase (EC 2.1.3.2)|2.1.3.2][proka|PROKKA_00386|pyrB|Aspartate carbamoyltransferase|2.1.3.2]
pgap	AYM39_01905	434187	435491	+	4	girp	1305	0		435491		dihydroorotase		[img|Ga0113560_11391||dihydroorotase|3.5.2.3][rast|416.8.peg.399||Dihydroorotase (EC 3.5.2.3)|3.5.2.3][proka|PROKKA_00387|pyrC_1|Dihydroorotase|3.5.2.3]
pgap	AYM39_01910	435537	436238	+	4	girp	702	0		436238		decarboxylase		[img|Ga0113560_11392||hypothetical protein|][rast|416.8.peg.400||hypothetical protein|][proka|PROKKA_00388|yvdD|LOG family protein YvdD|]
pgap	AYM39_01915	436304	437290	+	4	girp	987	0		437290		AAA family ATPase		[img|Ga0113560_11393||MoxR-like ATPase|3.6.3.-][rast|416.8.peg.401||MoxR-like ATPase in aerotolerance operon|][proka|PROKKA_00389||ATPase family associated with various cellular activities (AAA)|]
pgap	AYM39_01920	437290	438204	+	4	girp	915	0		438204		ATPase		[img|Ga0113560_11394||Protein of unknown function DUF58|][rast|416.8.peg.402||hypothetical protein PA3071|][proka|PROKKA_00390||hypothetical protein|]
pgap	AYM39_01925	438219	442364	+	4	girp	4146	0		442364		diguanylate cyclase		[img|Ga0113560_11395||PAS domain S-box-containing protein/diguanylate cyclase (GGDEF) domain-containing protein|][rast|416.8.peg.403||diguanylate cyclase/phosphodiesterase (GGDEF & EAL domains) with PAS/PAC sensor(s)|][proka|PROKKA_00391|gmr_4|Cyclic di-GMP phosphodiesterase Gmr|3.1.4.52]
pgap	AYM39_01930	442382	442849	+	4	girp	468	0		442849		hypothetical protein		[img|Ga0113560_11396||protein of unknown function (DUF4381)|][rast|416.8.peg.404||hypothetical protein|][proka|PROKKA_00392||hypothetical protein|]
pgap	AYM39_01935	442846	443832	+	4	girp	987	0		443832		BatB protein		[img|Ga0113560_11397||Ca-activated chloride channel family protein|][rast|416.8.peg.405||BatA (Bacteroides aerotolerance operon)|][proka|PROKKA_00393||von Willebrand factor type A domain protein|]
pgap	AYM39_01940	443832	445571	+	4	girp	1746.8	4.5		445571		hypothetical protein		[img|Ga0113560_11398||Ca-activated chloride channel family protein|][rast|416.8.peg.406||TPR domain protein in aerotolerance operon|][proka|PROKKA_00394||Tetratricopeptide repeat protein|]
pgap	AYM39_01945	445611	446900	+	4	girp	1290	0		446900		hypothetical protein		[img|Ga0113560_11399||putative hemolysin|][rast|416.8.peg.407||Magnesium and cobalt efflux protein CorC|][proka|PROKKA_00395|tlyC_1|Hemolysin C|]
pgap	AYM39_01950	447036	448079	+	4	girp	1098	36		448079		efflux transporter periplasmic adaptor subunit		[img|Ga0113560_11400||membrane fusion protein, cobalt-zinc-cadmium efflux system|][rast|416.8.peg.408||Cobalt/zinc/cadmium efflux RND transporter, membrane fusion protein, CzcB family|][proka|PROKKA_00396|czcB_1|Cobalt-zinc-cadmium resistance protein CzcB|]
pgap	AYM39_01955	448083	451208	+	4	girp	3126	0		451208		cytochrome-c peroxidase		[img|Ga0113560_11401||cobalt-zinc-cadmium resistance protein CzcA|][rast|416.8.peg.409||Cobalt-zinc-cadmium resistance protein CzcA; Cation efflux system protein CusA|][proka|PROKKA_00397|czcA_2|Cobalt-zinc-cadmium resistance protein CzcA|]
pgap	AYM39_01960	451224	452900	+	4	girp	1677	0		452900		hypothetical protein		[img|Ga0113560_11402||Oxygen tolerance|][rast|416.8.peg.410||BatD|][proka|PROKKA_00398||hypothetical protein|]
pgap	AYM39_01965	452902	453453	-	4	girp	552	0		452902		ADP compounds hydrolase NudE		[img|Ga0113560_11403||ADP-ribose diphosphatase|3.6.1.-][rast|416.8.peg.411||ADP compounds hydrolase NudE (EC 3.6.1.-)|][proka|PROKKA_00399|nudE|ADP compounds hydrolase NudE|3.6.1.-]
pgap	AYM39_01970	453498	455000	-	4	girp	1503	0		453498		histidine kinase		[img|Ga0113560_11404||methyl-accepting chemotaxis protein|][rast|416.8.peg.412||Methyl-accepting chemotaxis protein I (serine chemoreceptor protein)|][proka|PROKKA_00400|trg_1|Methyl-accepting chemotaxis protein III|]
pgap	AYM39_01980	455738	457069	-	4	girp	1332	0		455738		RNA helicase		[img|Ga0113560_11406||ATP-dependent RNA helicase RhlB|3.6.4.13][rast|416.8.peg.413||ATP-dependent RNA helicase RhlB|][proka|PROKKA_00402|rhlB|ATP-dependent RNA helicase RhlB|3.6.4.13]
pgap	AYM39_01975	455146	455823	+	3	gip	678	0		455823		HAD family hydrolase		[img|Ga0113560_11405||putative hydrolase of the HAD superfamily|][proka|PROKKA_00401|yrfG|GMP/IMP nucleotidase YrfG|3.1.3.5]
pgap	AYM39_01985	457171	457497	+	4	girp	309	36		457497		thioredoxin		[img|Ga0113560_11407||thioredoxin 1|][rast|416.8.peg.414||Thioredoxin|][proka|PROKKA_00403|trxA|Thioredoxin-1|]
pgap	AYM39_01990	457661	458917	+	4	girp	1257	0		458917	rho	transcription termination factor Rho		[img|Ga0113560_11408|rho|transcription termination factor Rho|][rast|416.8.peg.415||Transcription termination factor Rho|][proka|PROKKA_00404||hypothetical protein|]
pgap	AYM39_01995	459129	460829	+	4	girp	1693.5	15		460829		ABC transporter		[img|Ga0113560_11409||putative ATP-binding cassette transporter|][rast|416.8.peg.416||ABC transporter, ATP-binding protein|][proka|PROKKA_00405|yddA|Inner membrane ABC transporter ATP-binding protein YddA|]
pgap	AYM39_02005	461227	461679	-	4	girp	453	0		461227		molybdopterin converting factor		[img|Ga0113560_11411||molybdopterin synthase catalytic subunit|2.8.1.12][rast|416.8.peg.418||Molybdenum cofactor biosynthesis protein MoaE|][proka|PROKKA_00407|moaE|Molybdopterin synthase catalytic subunit|2.8.1.12]
pgap	AYM39_02000	460988	461245	+	4	girp	258	0		461245		hypothetical protein		[img|Ga0113560_11410||hypothetical protein|][rast|416.8.peg.417||hypothetical protein|][proka|PROKKA_00406||hypothetical protein|]
pgap	AYM39_02010	461685	461918	-	4	girp	234	0		461685		molybdopterin synthase sulfur carrier subunit		[img|Ga0113560_11412||molybdopterin synthase sulfur carrier subunit|][rast|416.8.peg.419||Molybdenum cofactor biosynthesis protein MoaD|][proka|PROKKA_00408|moaD|Molybdopterin synthase sulfur carrier subunit|]
pgap	AYM39_02020	462461	463036	-	4	girp	576	0		462461		hypothetical protein		[img|Ga0113560_11414||NlpB/DapX lipoprotein|][rast|416.8.peg.421||hypothetical protein|][proka|PROKKA_00410||hypothetical protein|]
pgap	AYM39_02015	461970	462464	+	4	girp	502.5	15		462464	moaC	cyclic pyranopterin monophosphate synthase accessory protein		[img|Ga0113560_11413||cyclic pyranopterin phosphate synthase|4.1.99.18][rast|416.8.peg.420||Molybdenum cofactor biosynthesis protein MoaC|][proka|PROKKA_00409|moaC|Cyclic pyranopterin monophosphate synthase accessory protein|]
pgap	AYM39_02025	463045	463863	-	4	girp	813	12		463045		acyltransferase		[img|Ga0113560_11415||nitrilase|3.5.5.1][rast|416.8.peg.422||FIG003879: Predicted amidohydrolase|][proka|PROKKA_00411||2-oxoglutaramate amidase|3.5.1.111]
pgap	AYM39_02030	463925	467731	-	4	girp	3807	0		463925		hypothetical protein		[img|Ga0113560_11416||TIGR02099 family protein|][rast|416.8.peg.423||FIG005080: Possible exported protein|][proka|PROKKA_00412||hypothetical protein|]
pgap	AYM39_02035	467741	469198	-	4	girp	1458	0		467741		ribonuclease G		[img|Ga0113560_11417||ribonuclease G|3.1.26.-][rast|416.8.peg.424||Cytoplasmic axial filament protein CafA and Ribonuclease G (EC 3.1.4.-)|][proka|PROKKA_00413|rng|Ribonuclease G|3.1.26.-]
pgap	AYM39_02040	469195	469773	-	4	girp	579	0		469195		septum formation protein Maf		[img|Ga0113560_11418||septum formation protein|][rast|416.8.peg.425||Septum formation protein Maf|][proka|PROKKA_00414|yhdE|Maf-like protein YhdE|]
pgap	AYM39_02045	469778	470242	-	4	girp	465	0		469778		23S rRNA (pseudouridine(1915)-N(3))-methyltransferase RlmH		[img|Ga0113560_11419||23S rRNA (pseudouridine1915-N3)-methyltransferase|2.1.1.177][rast|416.8.peg.426||LSU m3Psi1915 methyltransferase RlmH|][proka|PROKKA_00415|rlmH|Ribosomal RNA large subunit methyltransferase H|2.1.1.177]
pgap	AYM39_02050	470553	471143	+	4	girp	591	0		471143		hypothetical protein		[img|Ga0113560_11420||Endonuclease, Uma2 family (restriction endonuclease fold)|][rast|416.8.peg.428||hypothetical protein|][proka|PROKKA_00416||hypothetical protein|]
pgap	AYM39_02055	471237	471521	-	2	gr	285	0		471237		hypothetical protein		[rast|416.8.peg.429||hypothetical protein|]
pgap	AYM39_02060	471537	472187	+	3	gip	651	0		472187		hypothetical protein		[img|Ga0113560_11421||hypothetical protein|][proka|PROKKA_00417||hypothetical protein|]
pgap	AYM39_02065	472657	472959	+	1	g	303	0		472959		hypothetical protein
pgap	AYM39_02070	473118	474097	+	4	girp	821	106	pseudo	474097		[PSEUDO_pgap: transposase]		[img|Ga0113560_11422||transposase, IS5 family|][rast|416.8.peg.431||Mobile element protein|][proka|PROKKA_00418||Transposase DDE domain protein|]
pgap	AYM39_02075	474414	474638	+	4	girp	225	0		474638		hypothetical protein		[img|Ga0113560_11423||hypothetical protein|][rast|416.8.peg.432||hypothetical protein|][proka|PROKKA_00419||hypothetical protein|]
pgap	AYM39_02080	474631	474852	+	4	girp	240	20.8		474852		hypothetical protein		[img|Ga0113560_11424||Predicted RNA binding protein YcfA, dsRBD-like fold, HicA-like mRNA interferase family|][rast|416.8.peg.433||hypothetical protein|][proka|PROKKA_00420||YcfA-like protein|]
pgap	AYM39_02085	474924	475184	-	4	girp	261	0		474924		hypothetical protein		[img|Ga0113560_11425||protein of unknown function (DUF2024)|][rast|416.8.peg.434||FIG00859064: hypothetical protein|][proka|PROKKA_00421||hypothetical protein|]
pgap	AYM39_02090	475292	476341	-	4	girp	1050	0		475292		threonine aldolase		[img|Ga0113560_11426||threonine aldolase|4.1.2.5][rast|416.8.peg.435||Low-specificity L-threonine aldolase (EC 4.1.2.48)|4.1.2.48][proka|PROKKA_00422|ltaE|Low specificity L-threonine aldolase|4.1.2.48]
pgap	AYM39_02095	476550	478022	+	4	girp	1473	0		478022		oxidoreductase		[img|Ga0113560_11427||NADH-quinone oxidoreductase subunit M|1.6.5.3][rast|416.8.peg.437||NADH-ubiquinone oxidoreductase chain M (EC 1.6.5.3)|1.6.5.3][proka|PROKKA_00423|ndhD1_1|NAD(P)H-quinone oxidoreductase chain 4 1|1.6.5.-]
pgap	AYM39_02100	478066	481215	+	4	girp	3150	0		481215		hypothetical protein		[img|Ga0113560_11428||hypothetical protein|][rast|416.8.peg.438||Hypothetical transmembrane protein coupled to NADH-ubiquinone oxidoreductase chain 5 homolog|][proka|PROKKA_00424||hypothetical protein|]
pgap	AYM39_02105	481251	482795	+	4	girp	1565.2	13.5		482795		hypothetical protein		[img|Ga0113560_11429||NADH-Ubiquinone oxidoreductase (complex I), chain 5 N-terminus|][rast|416.8.peg.439||NADH-ubiquinone oxidoreductase chain L (EC 1.6.5.3)|1.6.5.3][proka|PROKKA_00425|nuoL_1|NADH-quinone oxidoreductase subunit L|1.6.99.5]
pgap	AYM39_02110	482792	484327	+	4	girp	1536	0		484327		NADH:quinone oxidoreductase		[img|Ga0113560_11430||NADH-quinone oxidoreductase subunit M|1.6.5.3][rast|416.8.peg.440||NADH-ubiquinone oxidoreductase chain M (EC 1.6.5.3)|1.6.5.3][proka|PROKKA_00426|ndhD1_2|NAD(P)H-quinone oxidoreductase chain 4 1|1.6.5.-]
pgap	AYM39_02115	484320	485879	+	4	girp	1560	0		485879		oxidoreductase		[img|Ga0113560_11431||NADH-quinone oxidoreductase subunit M|1.6.5.3][rast|416.8.peg.441||NADH-ubiquinone oxidoreductase chain M (EC 1.6.5.3)|1.6.5.3][proka|PROKKA_00427|nuoM|NADH-quinone oxidoreductase subunit M|1.6.99.5]
pgap	AYM39_02120	486028	486660	+	4	girp	627.8	10.5		486660		carbonic anhydrase		[img|Ga0113560_11432||carbonic anhydrase|4.2.1.1][rast|416.8.peg.442||Carbonic anhydrase (EC 4.2.1.1)|4.2.1.1][proka|PROKKA_00428|can_1|Carbonic anhydrase 2|4.2.1.1]
pgap	AYM39_02125	486694	488253	+	4	girp	1560	0		488253		hypothetical protein		[img|Ga0113560_11433||Sulfate permease, MFS superfamily|][rast|416.8.peg.443||Sulfate permease|][proka|PROKKA_00429|dauA_1|C4-dicarboxylic acid transporter DauA|]
pgap	AYM39_02130	488337	489410	-	4	girp	1074	0		488337		aminoglycoside phosphotransferase		[img|Ga0113560_11434||Ser/Thr protein kinase RdoA involved in Cpx stress response, MazF antagonist|][rast|416.8.peg.444||FIG01149630: hypothetical protein|][proka|PROKKA_00430|nahK|N-acetylhexosamine 1-kinase|2.7.1.162]
pgap	AYM39_02135	489407	489991	-	4	girp	585	0		489407		non-canonical purine NTP pyrophosphatase		[img|Ga0113560_11435||XTP/dITP diphosphohydrolase|3.6.1.66][rast|416.8.peg.445||Nucleoside 5-triphosphatase RdgB (dHAPTP, dITP, XTP-specific) (EC 3.6.1.15)|3.6.1.15][proka|PROKKA_00431|rdgB|dITP/XTP pyrophosphatase|3.6.1.19]
pgap	AYM39_02140	489996	490745	-	4	girp	750	0		489996	rph	ribonuclease PH		[img|Ga0113560_11436|rph|ribonuclease PH|2.7.7.56][rast|416.8.peg.446||Ribonuclease PH (EC 2.7.7.56)|2.7.7.56][proka|PROKKA_00432|rph|Ribonuclease PH|2.7.7.56]
pgap	AYM39_02145	490807	491706	-	4	girp	900	0		490807		serine/threonine protein kinase		[img|Ga0113560_11437||Serine/threonine protein kinase|][rast|416.8.peg.447||Serine/threonine protein kinase (EC 2.7.11.1)|2.7.11.1][proka|PROKKA_00433|spkD|Serine/threonine-protein kinase D|2.7.11.1]
pgap	AYM39_02150	491750	492613	+	4	girp	861	6		492613		hypothetical protein		[img|Ga0113560_11438||TIGR00255 family protein|][rast|416.8.peg.448||Protein YicC|][proka|PROKKA_00434||hypothetical protein|]
pgap	AYM39_02155	492704	494179	-	4	girp	1476	0		492704		DNA methyltransferase		[img|Ga0113560_11439||type I restriction enzyme M protein|2.1.1.72][rast|416.8.peg.449||Type I restriction-modification system, DNA-methyltransferase subunit M (EC 2.1.1.72)|2.1.1.72][proka|PROKKA_00435||putative type I restriction enzymeP M protein|2.1.1.72]
img	Ga0113560_11440	494198	494554	-	2	ip	357	0		494198		Protein of unknown function (DUF2442)		[proka|PROKKA_00436||hypothetical protein|]
pgap	AYM39_02160	494303	494554	-	1	g	252	0	pseudo	494303		[PSEUDO_pgap: hypothetical protein]
pgap	AYM39_02165	494562	494795	-	4	girp	234	0		494562		hypothetical protein		[img|Ga0113560_11441||protein of unknown function (DUF4160)|][rast|416.8.peg.450||putative ORF-2|][proka|PROKKA_00437||hypothetical protein|]
pgap	AYM39_02170	494788	496317	-	4	girp	1287	162		494788		hypothetical protein		[img|Ga0113560_11442||type I restriction enzyme, S subunit|3.1.21.3][rast|416.8.peg.451||Type I restriction-modification system, specificity subunit S (EC 3.1.21.3)|3.1.21.3][proka|PROKKA_00438|hsdS_1|Type-1 restriction enzyme EcoKI specificity protein|]
pgap	AYM39_02175	496401	496670	-	4	girp	258	24		496401		hypothetical protein		[img|Ga0113560_11443||Protein of unknown function (DUF2442)|][rast|416.8.peg.452||hypothetical protein|][proka|PROKKA_00439||hypothetical protein|]
pgap	AYM39_02180	496663	496929	-	4	girp	267	0		496663		hypothetical protein		[img|Ga0113560_11444||protein of unknown function (DUF4160)|][rast|416.8.peg.453||putative ORF-2|][proka|PROKKA_00440||hypothetical protein|]
pgap	AYM39_02185	497118	497504	-	1	g	387	0		497118		twitching motility protein PilT
pgap	AYM39_02190	497501	497728	-	4	girp	228	0		497501		hypothetical protein		[img|Ga0113560_11445||hypothetical protein|][rast|416.8.peg.455||hypothetical protein|][proka|PROKKA_00441||hypothetical protein|]
pgap	AYM39_02195	497773	500538	-	4	girp	2766	0		497773		restriction endonuclease subunit R		[img|Ga0113560_11446||type I restriction enzyme, R subunit|3.1.21.3][rast|416.8.peg.456||Type I restriction-modification system, restriction subunit R (EC 3.1.21.3)|3.1.21.3][proka|PROKKA_00442||type I restriction enzyme EcoKI subunit R|]
img	Ga0113560_11447	500884	501024	+	3	irp	139	3.5		501024		hypothetical protein		[rast|416.8.peg.457||hypothetical protein|][proka|PROKKA_00443||hypothetical protein|]
pgap	AYM39_02200	501147	501461	+	4	girp	308.2	13.5		501461		hypothetical protein		[img|Ga0113560_11448||hypothetical protein|][rast|416.8.peg.458||hypothetical protein|][proka|PROKKA_00444||hypothetical protein|]
img	Ga0113560_11449	501721	501882	+	3	irp	159	5.2		501882		hypothetical protein		[rast|416.8.peg.459||hypothetical protein|][proka|PROKKA_00445||hypothetical protein|]
pgap	AYM39_02205	502198	503529	+	4	girp	1332	0		503529		transporter		[img|Ga0113560_11450||outer membrane protein, cobalt-zinc-cadmium efflux system|][rast|416.8.peg.461||Heavy metal RND efflux outer membrane protein, CzcC family|][proka|PROKKA_00446|czcC_1|Cobalt-zinc-cadmium resistance protein CzcC precursor|]
pgap	AYM39_02210	503565	504725	+	4	girp	1174.5	9		504725		efflux transporter periplasmic adaptor subunit		[img|Ga0113560_11451||membrane fusion protein, cobalt-zinc-cadmium efflux system|][rast|416.8.peg.462||Probable Co/Zn/Cd efflux system membrane fusion protein|][proka|PROKKA_00447|czcB_2|Cobalt-zinc-cadmium resistance protein CzcB|]
pgap	AYM39_02215	504741	507809	+	4	girp	3069	0		507809		acriflavin resistance protein		[img|Ga0113560_11452||cobalt-zinc-cadmium resistance protein CzcA|][rast|416.8.peg.463||Cobalt-zinc-cadmium resistance protein CzcA; Cation efflux system protein CusA|][proka|PROKKA_00448|czcA_3|Cobalt-zinc-cadmium resistance protein CzcA|]
pgap	AYM39_02220	507819	508145	+	4	girp	328.5	3		508145		transcriptional regulator		[img|Ga0113560_11453||nitrogen regulatory protein P-II 1/nitrogen regulatory protein P-II 2|][rast|416.8.peg.464||Nitrogen regulatory protein P-II|][proka|PROKKA_00449|glnB_1|Nitrogen regulatory protein P-II 1|]
pgap	AYM39_02225	508169	509065	-	4	girp	897	0		508169		phosphoribosylaminoimidazolesuccinocarboxamide synthase		[img|Ga0113560_11454||phosphoribosylaminoimidazole-succinocarboxamide synthase|6.3.2.6][rast|416.8.peg.465||Phosphoribosylaminoimidazole-succinocarboxamide synthase (EC 6.3.2.6)|6.3.2.6][proka|PROKKA_00450|purC|Phosphoribosylaminoimidazole-succinocarboxamide synthase|6.3.2.6]
pgap	AYM39_02230	509135	509938	+	4	girp	804	0		509938		molecular chaperone DjlA		[img|Ga0113560_11455||DnaJ like chaperone protein|][rast|416.8.peg.466||DnaJ-like protein DjlA|][proka|PROKKA_00451|djlA|DnaJ-like protein DjlA|]
pgap	AYM39_02235	510027	510323	-	4	girp	195.8	67.5		510027		hypothetical protein		[img|Ga0113560_11456||hypothetical protein|][rast|416.8.peg.467||hypothetical protein|][proka|PROKKA_00452||hypothetical protein|]
pgap	AYM39_02240	510346	510906	-	4	girp	561	0		510346		hypothetical protein		[img|Ga0113560_11457||uncharacterized protein, YigZ family|][rast|416.8.peg.468||FIG000605: protein co-occurring with transport systems (COG1739)|][proka|PROKKA_00453|yigZ|IMPACT family member YigZ|]
pgap	AYM39_02245	510908	511648	-	4	girp	743.2	4.5		510908		ABC transporter		[img|Ga0113560_11458||NitT/TauT family transport system ATP-binding protein|][rast|416.8.peg.469||Alkanesulfonates ABC transporter ATP-binding protein / Sulfonate ABC transporter, ATP-binding subunit SsuB|][proka|PROKKA_00454|ssuB_1|Aliphatic sulfonates import ATP-binding protein SsuB|3.6.3.-]
pgap	AYM39_02250	511645	512409	-	4	girp	765	0		511645		ABC transporter permease		[img|Ga0113560_11459||NitT/TauT family transport system permease protein|][rast|416.8.peg.470||Alkanesulfonates transport system permease protein|][proka|PROKKA_00455|ssuC_1|Putative aliphatic sulfonates transport permease protein SsuC|]
pgap	AYM39_02255	512409	513371	-	4	girp	963	0		512409		ABC transporter substrate-binding protein		[img|Ga0113560_11460||NitT/TauT family transport system substrate-binding protein|][rast|416.8.peg.471||ABC transporter substrate-binding protein|][proka|PROKKA_00456||alkanesulfonate transporter substrate-binding subunit|]
pgap	AYM39_02260	513465	516740	-	4	girp	3276	0		513465		diguanylate cyclase		[img|Ga0113560_11461||PAS domain S-box-containing protein/diguanylate cyclase (GGDEF) domain-containing protein|][rast|416.8.peg.472||diguanylate cyclase/phosphodiesterase (GGDEF & EAL domains) with PAS/PAC sensor(s)|][proka|PROKKA_00457|gmr_5|Cyclic di-GMP phosphodiesterase Gmr|3.1.4.52]
pgap	AYM39_02265	516791	517261	-	4	girp	471	0		516791		hypothetical protein		[img|Ga0113560_11462||hypothetical protein|][rast|416.8.peg.473||Pyridoxamine 5'-phosphate oxidase-related putative heme iron utilization protein # hutZ|][proka|PROKKA_00458||hypothetical protein|]
pgap	AYM39_02270	517266	517835	-	4	girp	570	0		517266		DNA-3-methyladenine glycosylase		[img|Ga0113560_11463||DNA-3-methyladenine glycosylase I|3.2.2.20][rast|416.8.peg.474||DNA-3-methyladenine glycosylase (EC 3.2.2.20)|3.2.2.20][proka|PROKKA_00459|tag|DNA-3-methyladenine glycosylase 1|3.2.2.20]
pgap	AYM39_02275	517835	518194	-	4	girp	360	0		517835		HNH endonuclease		[img|Ga0113560_11464||HNH endonuclease|][rast|416.8.peg.475||HNH endonuclease|][proka|PROKKA_00460||hypothetical protein|]
pgap	AYM39_02280	518210	519214	-	4	girp	1005	0		518210		cyclic pyranopterin phosphate synthase MoaA		[img|Ga0113560_11465||cyclic pyranopterin phosphate synthase|4.1.99.18][rast|416.8.peg.476||Molybdenum cofactor biosynthesis protein MoaA|][proka|PROKKA_00461|moaA|Cyclic pyranopterin monophosphate synthase|4.1.99.18]
pgap	AYM39_02285	519324	519767	-	4	girp	444	0		519324		protein tyrosine phosphatase		[img|Ga0113560_11466||protein-tyrosine phosphatase|3.1.3.48][rast|416.8.peg.477||protein-tyrosine-phosphatase|][proka|PROKKA_00462||Low molecular weight phosphotyrosine protein phosphatase|]
pgap	AYM39_02290	519856	520842	-	4	girp	987	0		519856		alpha/beta hydrolase		[img|Ga0113560_11467||hypothetical protein|][rast|416.8.peg.478||Hydrolase, alpha/beta fold family functionally coupled to Phosphoribulokinase|][proka|PROKKA_00463||putative hydrolase|]
pgap	AYM39_02295	520984	522060	+	4	girp	1049.2	55.5		522060		transglycosylase		[img|Ga0113560_11468||Transglycosylase SLT domain-containing protein|][rast|416.8.peg.480||Transglycosylase SLT domain protein|][proka|PROKKA_00464||Transglycosylase SLT domain protein|]
pgap	AYM39_02300	522171	523259	-	4	girp	1089	0		522171		hypothetical protein		[img|Ga0113560_11469||1-phosphatidylinositol phosphodiesterase|4.6.1.13][rast|416.8.peg.481||Phosphatidylinositol-specific phospholipase C (EC 4.6.1.13)|4.6.1.13][proka|PROKKA_00465|plcA_2|1-phosphatidylinositol phosphodiesterase precursor|4.6.1.13]
pgap	AYM39_02305	523582	524499	+	4	girp	918	0		524499		coproporphyrinogen III oxidase		[img|Ga0113560_11470||coproporphyrinogen III oxidase|1.3.3.3][rast|416.8.peg.482||Coproporphyrinogen III oxidase, aerobic (EC 1.3.3.3)|1.3.3.3][proka|PROKKA_00466|hemF|Coproporphyrinogen-III oxidase, aerobic|1.3.3.3]
pgap	AYM39_02310	524613	525149	+	4	girp	489	55.4		525149		hypothetical protein		[img|Ga0113560_11471||NlpE N-terminal domain-containing protein|][rast|416.8.peg.483||hypothetical protein|][proka|PROKKA_00467||lipoprotein involved with copper homeostasis and adhesion|]
pgap	AYM39_02315	525309	527321	+	4	girp	1979.2	67.5		527321		hypothetical protein		[img|Ga0113560_11472||Uncharacterized conserved protein, contains a C-terminal beta-barrel porin domain|][rast|416.8.peg.485||Autotransporter protein or domain, integral membrane beta-barrel involved in protein secretion|][proka|PROKKA_00468|estA|Esterase EstA precursor|3.1.1.1]
pgap	AYM39_02320	527354	527842	-	4	girp	502.5	9		527354		hypothetical protein		[img|Ga0113560_11473||SEC-C motif-containing protein|][rast|416.8.peg.486||UPF0225 protein YchJ|][proka|PROKKA_00469||hypothetical protein|]
pgap	AYM39_02325	527857	528900	-	4	girp	1044	0		527857		23S rRNA (adenine(2503)-C2)-methyltransferase		[img|Ga0113560_11474||23S rRNA (adenine2503-C2)-methyltransferase|2.1.1.192][rast|416.8.peg.487||Ribosomal RNA large subunit methyltransferase N (EC 2.1.1.-)|][proka|PROKKA_00470|rlmN_1|Dual-specificity RNA methyltransferase RlmN|2.1.1.-]
pgap	AYM39_02330	528979	529335	-	4	girp	357	0		528979		hypothetical protein		[img|Ga0113560_11475||hypothetical protein|][rast|416.8.peg.488||hypothetical protein|][proka|PROKKA_00471||hypothetical protein|]
pgap	AYM39_02335	529491	530546	-	4	girp	1146.8	60.9		529491		AraC family transcriptional regulator		[img|Ga0113560_11476||Transcriptional regulator GlxA family, contains an amidase domain and an AraC-type DNA-binding HTH domain|][rast|416.8.peg.489||transcriptional regulator, AraC family|][proka|PROKKA_00472|cdhR|HTH-type transcriptional regulator CdhR|]
pgap	AYM39_02340	530671	531468	+	4	girp	773.2	16.5		531468		fatty acid hydroxylase		[img|Ga0113560_11477||Sterol desaturase/sphingolipid hydroxylase, fatty acid hydroxylase superfamily|][rast|416.8.peg.490||Sterol desaturase|][proka|PROKKA_00473||Fatty acid hydroxylase superfamily protein|]
pgap	AYM39_02345	531465	531788	+	4	girp	324	0		531788		hypothetical protein		[img|Ga0113560_11478||hypothetical protein|][rast|416.8.peg.491||hypothetical protein|][proka|PROKKA_00474||hypothetical protein|]
pgap	AYM39_02350	531809	532537	+	4	girp	729	0		532537		hypothetical protein		[img|Ga0113560_11479||Methyltransferase domain-containing protein|][rast|416.8.peg.492||SAM-dependent methyltransferases|][proka|PROKKA_00475||Glycine/sarcosine N-methyltransferase|2.1.1.156]
pgap	AYM39_02355	532737	532994	-	4	girp	258	0		532737		hypothetical protein		[img|Ga0113560_11480||hypothetical protein|][rast|416.8.peg.493||hypothetical protein|][proka|PROKKA_00476||hypothetical protein|]
pgap	AYM39_02360	533529	533783	-	4	girp	264	10.4		533529		hypothetical protein		[img|Ga0113560_11481||hypothetical protein|][rast|416.8.peg.495||hypothetical protein|][proka|PROKKA_00477||hypothetical protein|]
pgap	AYM39_02365	534104	535030	+	4	girp	927	0		535030		porphobilinogen deaminase		[img|Ga0113560_11482||hydroxymethylbilane synthase|2.5.1.61][rast|416.8.peg.496||Porphobilinogen deaminase (EC 2.5.1.61)|2.5.1.61][proka|PROKKA_00478|hemC|Porphobilinogen deaminase|2.5.1.61]
pgap	AYM39_02370	535027	535809	+	4	girp	774.8	16.5		535809		uroporphyrinogen III synthase HEM4		[img|Ga0113560_11483||uroporphyrinogen-III synthase/uroporphyrinogen III methyltransferase / synthase|4.2.1.75; 2.1.1.107; 4.2.1.75][rast|416.8.peg.497||Uroporphyrinogen-III synthase (EC 4.2.1.75)|4.2.1.75][proka|PROKKA_00479|hemD|Uroporphyrinogen-III synthase|4.2.1.75]
pgap	AYM39_02375	535793	536950	+	4	girp	1133.2	49.5		536950		enzyme of heme biosynthesis		[img|Ga0113560_11484||uroporphyrin-3 C-methyltransferase/uroporphyrinogen III methyltransferase / synthase|2.1.1.107; 4.2.1.75; 2.1.1.107][rast|416.8.peg.498||Homolog of E. coli HemX protein|][proka|PROKKA_00480|hemX|Putative uroporphyrinogen-III C-methyltransferase|2.1.1.107]
pgap	AYM39_02380	536965	538197	+	4	girp	1233	0		538197		heme biosynthesis protein HemY		[img|Ga0113560_11485||HemY protein|][rast|416.8.peg.499||Uncharacterized protein EC-HemY, likely associated with heme metabolism based on gene clustering with hemC, hemD in Proteobacteria (unrelated to HemY-type PPO in GramPositives)|][proka|PROKKA_00481||putative protoheme IX biogenesis protein|]
pgap	AYM39_02385	538235	539242	-	4	girp	1008	0		538235		diguanylate cyclase		[img|Ga0113560_11486||diguanylate cyclase (GGDEF) domain-containing protein|][rast|416.8.peg.500||GGDEF domain protein|][proka|PROKKA_00482|ycdT_1|putative diguanylate cyclase YcdT|2.7.7.65]
pgap	AYM39_02390	539404	540540	-	4	girp	1137	0		539404		hypothetical protein		[img|Ga0113560_11487||Response regulator receiver domain-containing protein|][rast|416.8.peg.501||Serine phosphatase RsbU, regulator of sigma subunit|][proka|PROKKA_00483|czcR|Transcriptional activator protein CzcR|]
pgap	AYM39_02395	540580	542043	-	4	girp	1464	0		540580		3-octaprenyl-4-hydroxybenzoate decarboxylase		[img|Ga0113560_11488|ubiD|4-hydroxy-3-polyprenylbenzoate decarboxylase|4.1.1.98][rast|416.8.peg.502||3-polyprenyl-4-hydroxybenzoate carboxy-lyase (EC 4.1.1.-)|][proka|PROKKA_00484|ubiD|3-octaprenyl-4-hydroxybenzoate carboxy-lyase|4.1.1.-]
pgap	AYM39_02400	542128	542613	-	4	girp	486	0		542128		hypothetical protein		[img|Ga0113560_11489||Fatty acid hydroxylase superfamily protein|][rast|416.8.peg.503||hypothetical protein|][proka|PROKKA_00485||hypothetical protein|]
pgap	AYM39_02405	542627	542914	-	4	girp	288	0		542627		hypothetical protein		[img|Ga0113560_11490||hypothetical protein|][rast|416.8.peg.504||hypothetical protein|][proka|PROKKA_00486||hypothetical protein|]
pgap	AYM39_02410	542977	545016	-	4	girp	2040	0		542977		oligopeptidase A		[img|Ga0113560_11491||oligopeptidase A|3.4.24.70][rast|416.8.peg.505||Oligopeptidase A (EC 3.4.24.70)|3.4.24.70][proka|PROKKA_00487|prlC|Oligopeptidase A|3.4.24.70]
pgap	AYM39_02415	545052	546395	-	4	girp	1314	60		545052		cyclic nucleotide-binding protein		[img|Ga0113560_11492||HD-like signal output (HDOD) domain, no enzymatic activity|][rast|416.8.peg.506||HD-GYP domain (HD superfamily hydrolase)|][proka|PROKKA_00488||HDOD domain protein|]
pgap	AYM39_02420	546397	547686	-	4	girp	1290	0		546397		cyclic nucleotide-binding protein		[img|Ga0113560_11493||HD-like signal output (HDOD) domain, no enzymatic activity|][rast|416.8.peg.507||HD-GYP domain (HD superfamily hydrolase)|][proka|PROKKA_00489||HDOD domain protein|]
pgap	AYM39_02425	547691	548971	-	4	girp	1281	0		547691		histidine kinase		[img|Ga0113560_11494||HD-like signal output (HDOD) domain, no enzymatic activity|][rast|416.8.peg.508||Predicted signal transduction protein|][proka|PROKKA_00490||HDOD domain protein|]
pgap	AYM39_02430	549037	549930	-	4	girp	894	0		549037	aroE	shikimate dehydrogenase		[img|Ga0113560_11495||shikimate dehydrogenase|1.1.1.25][rast|416.8.peg.509||Shikimate 5-dehydrogenase I alpha (EC 1.1.1.25)|1.1.1.25][proka|PROKKA_00491|aroE|Shikimate dehydrogenase|1.1.1.25]
pgap	AYM39_02435	549939	550946	-	4	girp	1028.2	13.5		549939		delta-aminolevulinic acid dehydratase		[img|Ga0113560_11496||porphobilinogen synthase|4.2.1.24][rast|416.8.peg.510||Porphobilinogen synthase (EC 4.2.1.24)|4.2.1.24][proka|PROKKA_00492|hemB|Delta-aminolevulinic acid dehydratase|4.2.1.24]
pgap	AYM39_02440	551111	551740	+	4	girp	643.5	9		551740		toluene tolerance protein		[img|Ga0113560_11497||phospholipid transport system substrate-binding protein|][rast|416.8.peg.511||Uncharacterized ABC transporter, auxiliary component YrbC|][proka|PROKKA_00493|mlaC_1|putative phospholipid-binding protein MlaC precursor|]
pgap	AYM39_02445	551802	552533	+	4	girp	741	10.4		552533		tRNA (cmo5U34)-methyltransferase		[img|Ga0113560_11498||tRNA (cmo5U34)-methyltransferase|2.1.1.-][rast|416.8.peg.512||tRNA (uridine-5-oxyacetic acid methyl ester) 34 synthase|][proka|PROKKA_00494|cmoA_1|tRNA (cmo5U34)-methyltransferase|2.1.1.-]
pgap	AYM39_02450	552527	553495	+	4	girp	969	0		553495		tRNA 5-methoxyuridine(34) synthase CmoB		[img|Ga0113560_11499||tRNA (mo5U34)-methyltransferase|2.1.1.-][rast|416.8.peg.513||tRNA (5-methoxyuridine) 34 synthase|][proka|PROKKA_00495|cmoB|tRNA (mo5U34)-methyltransferase|2.1.1.-]
pgap	AYM39_02455	553621	553932	+	4	girp	312	0		553932		competence protein ComEA		[img|Ga0113560_11500||competence protein ComEA|][rast|416.8.peg.514||Late competence protein ComEA, DNA receptor|][proka|PROKKA_00496|comEA|ComE operon protein 1|]
pgap	AYM39_02460	554033	554380	-	4	girp	348	0		554033		hypothetical protein		[img|Ga0113560_11501||Macrophage migration inhibitory factor (MIF)|][rast|416.8.peg.515||Possible ATLS1-like light-inducible protein|][proka|PROKKA_00497||Macrophage migration inhibitory factor (MIF)|]
pgap	AYM39_02465	554401	554913	-	4	girp	513	0		554401		hypothetical protein		[img|Ga0113560_11502||2'-5' RNA ligase|6.5.1.-][rast|416.8.peg.516||2'-5' RNA ligase|][proka|PROKKA_00498|ligT|2'-5'-RNA ligase|6.5.1.-]
pgap	AYM39_02470	555256	555903	+	4	girp	648	0		555903		3-hexulose-6-phosphate synthase		[img|Ga0113560_11503||3-hexulose-6-phosphate synthase|4.1.2.43][rast|416.8.peg.517||D-arabino-3-hexulose 6-phosphate formaldehyde-lyase (EC 4.1.2.43)|4.1.2.43][proka|PROKKA_00499|rmpA_1|3-hexulose-6-phosphate synthase|4.1.2.43]
pgap	AYM39_02475	555907	556440	+	4	girp	534	0		556440		3-hexulose-6-phosphate isomerase		[img|Ga0113560_11504|| 6-phospho-3-hexuloisomerase/3-hexulose-6-phosphate synthase / 6-phospho-3-hexuloisomerase|4.1.2.43; 5.3.1.27; 5.3.1.27][rast|416.8.peg.518||6-phospho-3-hexuloisomerase|][proka|PROKKA_00500|rmpB|3-hexulose-6-phosphate isomerase|5.3.1.27]
pgap	AYM39_02480	556639	558648	+	4	girp	1986	48		558648		transketolase		[img|Ga0113560_11505||transketolase|2.2.1.1][rast|416.8.peg.519||Transketolase (EC 2.2.1.1)|2.2.1.1][proka|PROKKA_00501|tktA_1|Transketolase 1|2.2.1.1]
pgap	AYM39_02485	558775	559443	+	4	girp	697.5	19.2		559443		hypothetical protein		[img|Ga0113560_11506||LPXTG-motif cell wall anchor domain-containing protein|][rast|416.8.peg.520||hypothetical protein|][proka|PROKKA_00502||hypothetical protein|]
pgap	AYM39_02490	559696	560685	+	4	girp	990	0		560685		transaldolase		[img|Ga0113560_11507||transaldolase|2.2.1.2][rast|416.8.peg.521||Transaldolase (EC 2.2.1.2)|2.2.1.2][proka|PROKKA_00503|tal|Transaldolase|2.2.1.2]
pgap	AYM39_02495	560789	561865	+	4	girp	1077	0		561865		class II fructose-bisphosphate aldolase		[img|Ga0113560_11508||fructose-bisphosphate aldolase, class II|4.1.2.13][rast|416.8.peg.522||Fructose-bisphosphate aldolase class II (EC 4.1.2.13)|4.1.2.13][proka|PROKKA_00504|fbaA|Fructose-bisphosphate aldolase class 2|4.1.2.13]
pgap	AYM39_02500	562153	562692	+	4	girp	540	0		562692		flagellar basal body protein FliL		[img|Ga0113560_11509||flagellar FliL protein|][rast|416.8.peg.523||Flagellar biosynthesis protein FliL|][proka|PROKKA_00505||flagellar basal body-associated protein FliL|]
pgap	AYM39_02505	562693	563676	+	4	girp	984	0		563676		flagellar motor switch protein FliM		[img|Ga0113560_11510||flagellar motor switch protein FliM|][rast|416.8.peg.524||Flagellar motor switch protein FliM|][proka|PROKKA_00506|fliM|Flagellar motor switch protein FliM|]
pgap	AYM39_02510	563696	564142	+	4	girp	447	0		564142		flagellar motor switch protein FliN		[img|Ga0113560_11511||flagellar motor switch protein FliN/FliY|][rast|416.8.peg.525||Flagellar motor switch protein FliN|][proka|PROKKA_00507|fliN|Flagellar motor switch protein FliN|]
pgap	AYM39_02515	564142	564591	+	4	girp	423	18		564591		flagellar biosynthetic protein FliO		[img|Ga0113560_11512||flagellar protein FliO/FliZ|][rast|416.8.peg.526||Flagellar biosynthesis protein FliO|][proka|PROKKA_00508||flagellar biosynthesis protein FliO|]
pgap	AYM39_02520	564602	565333	+	4	girp	737.2	24.3		565333		flagellar biosynthesis protein flip		[img|Ga0113560_11513||flagellar biosynthetic protein FliP|][rast|416.8.peg.527||Flagellar biosynthesis protein FliP|][proka|PROKKA_00509|fliP|Flagellar biosynthetic protein FliP precursor|]
pgap	AYM39_02525	565342	565611	+	4	girp	270	0		565611		EscS/YscS/HrcS family type III secretion system export apparatus protein		[img|Ga0113560_11514||flagellar biosynthetic protein FliQ|][rast|416.8.peg.528||Flagellar biosynthesis protein FliQ|][proka|PROKKA_00510|fliQ|Flagellar biosynthetic protein FliQ|]
pgap	AYM39_02530	565608	566384	+	4	girp	777	0		566384		flagellar biosynthetic protein FliR		[img|Ga0113560_11515||flagellar biosynthetic protein FliR|][rast|416.8.peg.529||Flagellar biosynthesis protein FliR|][proka|PROKKA_00511|fliR|Flagellar biosynthetic protein FliR|]
pgap	AYM39_02535	566385	567512	+	4	girp	1128	0		567512		flagellar biosynthetic protein FlhB		[img|Ga0113560_11516||flagellar biosynthetic protein FlhB|][rast|416.8.peg.530||Flagellar biosynthesis protein FlhB|][proka|PROKKA_00512|flhB_1|Flagellar biosynthetic protein FlhB|]
pgap	AYM39_02540	567531	569627	+	4	girp	2097	0		569627		flagellar biosynthesis protein FlhA		[img|Ga0113560_11517||flagellar biosynthesis protein FlhA|][rast|416.8.peg.531||Flagellar biosynthesis protein FlhA|][proka|PROKKA_00513|flhA|Flagellar biosynthesis protein FlhA|]
pgap	AYM39_02545	569646	571061	+	4	girp	1416	0		571061		flagellar biosynthesis protein FlhF		[img|Ga0113560_11518||flagellar biosynthesis protein FlhF|][rast|416.8.peg.532||Flagellar biosynthesis protein FlhF|][proka|PROKKA_00514|flhF|Flagellar biosynthesis protein FlhF|]
pgap	AYM39_02550	571093	571926	+	4	girp	828	12		571926		cobyrinic acid a,c-diamide synthase		[img|Ga0113560_11519||flagellar biosynthesis protein FlhG|][rast|416.8.peg.533||Flagellar synthesis regulator FleN|][proka|PROKKA_00515|ylxH_2|Flagellum site-determining protein YlxH|]
pgap	AYM39_02555	571923	572669	+	4	girp	743.2	7.5		572669	fliA	RNA polymerase sigma factor FliA		[img|Ga0113560_11520||RNA polymerase sigma factor for flagellar operon FliA|][rast|416.8.peg.534||RNA polymerase sigma factor for flagellar operon|][proka|PROKKA_00516|fliA|RNA polymerase sigma factor FliA|]
pgap	AYM39_02560	572770	573144	+	4	girp	375	0		573144		histidine kinase		[img|Ga0113560_11521||two-component system, chemotaxis family, response regulator CheY|][rast|416.8.peg.535||Chemotaxis regulator - transmits chemoreceptor signals to flagelllar motor components CheY|][proka|PROKKA_00517|cheY_1|Chemotaxis protein CheY|]
pgap	AYM39_02565	573162	573887	+	4	girp	726	0		573887		chemotaxis protein CheZ		[img|Ga0113560_11522||chemotaxis protein CheZ|][rast|416.8.peg.536||Chemotaxis response - phosphatase CheZ|][proka|PROKKA_00518||chemotaxis regulator CheZ|]
pgap	AYM39_02570	573899	576133	+	4	girp	2235	0		576133		chemotaxis protein CheA		[img|Ga0113560_11523||two-component system, chemotaxis family, sensor kinase CheA|2.7.13.3][rast|416.8.peg.537||Signal transduction histidine kinase CheA (EC 2.7.3.-)|][proka|PROKKA_00519|cheA_1|Chemotaxis protein CheA|2.7.13.3]
pgap	AYM39_02575	576143	577243	+	4	girp	1101	0		577243		chemotaxis response regulator protein-glutamate methylesterase		[img|Ga0113560_11524||two-component system, chemotaxis family, response regulator CheB|3.1.1.61][rast|416.8.peg.538||Chemotaxis response regulator protein-glutamate methylesterase CheB (EC 3.1.1.61)|3.1.1.61][proka|PROKKA_00520|cheB1|Chemotaxis response regulator protein-glutamate methylesterase of group 1 operon|3.1.1.61]
pgap	AYM39_02580	577243	577989	+	4	girp	747	0		577989	motC	flagellar motor protein		[img|Ga0113560_11525||chemotaxis protein MotA|][rast|416.8.peg.539||Flagellar motor rotation protein MotA|][proka|PROKKA_00521|pomA|Chemotaxis protein PomA|]
pgap	AYM39_02585	578000	578884	+	4	girp	885	0		578884		flagellar motor protein MotB		[img|Ga0113560_11526||chemotaxis protein MotB|][rast|416.8.peg.540||Flagellar motor rotation protein MotB|][proka|PROKKA_00522|motB_2|Motility protein B|]
pgap	AYM39_02590	578887	579690	+	4	girp	805.5	3		579690		cobalamin biosynthesis protein CobQ		[img|Ga0113560_11527||chromosome partitioning protein|][rast|416.8.peg.541||Chromosome (plasmid) partitioning protein ParA|][proka|PROKKA_00523|soj_2|Sporulation initiation inhibitor protein Soj|3.6.-.-]
pgap	AYM39_02595	579687	580424	+	4	girp	738	0		580424		chemotaxis protein CheW		[img|Ga0113560_11528||purine-binding chemotaxis protein CheW|][rast|416.8.peg.542||CheW domain protein|][proka|PROKKA_00524||CheW-like domain protein|]
pgap	AYM39_02600	580450	580923	+	4	girp	474	0		580923		chemotaxis protein CheW		[img|Ga0113560_11529||purine-binding chemotaxis protein CheW|][rast|416.8.peg.543||Positive regulator of CheA protein activity (CheW)|][proka|PROKKA_00525|cheW_1|Chemotaxis protein CheW|]
img	Ga0113560_11530	580965	581138	+	3	irp	174	0		581138		hypothetical protein		[rast|416.8.peg.544||hypothetical protein|][proka|PROKKA_00526||hypothetical protein|]
pgap	AYM39_02605	581138	581557	+	4	girp	420	0		581557		hypothetical protein		[img|Ga0113560_11531||Protein of unknown function (DUF2802)|][rast|416.8.peg.545||hypothetical protein|][proka|PROKKA_00527||hypothetical protein|]
pgap	AYM39_02610	581561	582397	-	4	girp	853.5	17.9		581561		glycosyl transferase family 2		[img|Ga0113560_11532||N-terminal domain of galactosyltransferase|][rast|416.8.peg.546||Putative two-domain glycosyltransferase|][proka|PROKKA_00528|kfoC_1|Chondroitin synthase|]
pgap	AYM39_02615	582418	583224	-	4	girp	795	24		582418		alpha-L-glycero-D-manno-heptose beta-1,4-glucosyltransferase		[img|Ga0113560_11533||Glycosyltransferase involved in cell wall bisynthesis|][rast|416.8.peg.547||Dolichol-phosphate mannosyltransferase (EC 2.4.1.83) in lipid-linked oligosaccharide synthesis cluster|2.4.1.83][proka|PROKKA_00529||Glycosyl transferase family 2|]
pgap	AYM39_02620	583307	584131	-	4	girp	825	0		583307		glycosyl transferase		[img|Ga0113560_11534||Glycosyltransferase, GT2 family|][rast|416.8.peg.548||Glycosyl transferase, group 2 family protein|][proka|PROKKA_00530||N-glycosyltransferase|]
pgap	AYM39_02625	584151	585440	-	4	girp	1292.2	4.5		584151		hypothetical protein		[img|Ga0113560_11535||O-antigen ligase|2.4.1.-][rast|416.8.peg.549||O-antigen ligase|][proka|PROKKA_00531||O-Antigen ligase|]
pgap	AYM39_02630	585594	586532	-	4	girp	939	0		585594		hypothetical protein		[img|Ga0113560_11536||hypothetical protein|][rast|416.8.peg.550||hypothetical protein|][proka|PROKKA_00532||hypothetical protein|]
pgap	AYM39_02635	586703	587812	-	4	girp	1104.8	10.5		586703		glycosyl transferase		[img|Ga0113560_11537||heptosyltransferase-3|2.4.-][rast|416.8.peg.551||Lipopolysaccharide heptosyltransferase I (EC 2.4.1.-)|][proka|PROKKA_00533|rfaQ|Lipopolysaccharide core heptosyltransferase RfaQ|2.-.-.-]
pgap	AYM39_02640	587869	589617	+	4	girp	1749	0		589617		lipid A export permease/ATP-binding protein MsbA		[img|Ga0113560_11538||ATP-binding cassette, subfamily B, MsbA|3.6.3.-][rast|416.8.peg.552||Lipid A export ATP-binding/permease protein MsbA|][proka|PROKKA_00534|msbA|Lipid A export ATP-binding/permease protein MsbA|3.6.3.-]
pgap	AYM39_02645	589664	590788	-	4	girp	1114.5	21		589664		pyrroloquinoline quinone biosynthesis protein PqqE		[img|Ga0113560_11539||pyrroloquinoline quinone biosynthesis protein E|][rast|416.8.peg.553||Coenzyme PQQ synthesis protein E|][proka|PROKKA_00535|albA_1|Antilisterial bacteriocin subtilosin biosynthesis protein AlbA|]
pgap	AYM39_02650	590766	591038	-	4	girp	273	0		590766		coenzyme PQQ synthesis protein D		[img|Ga0113560_11540||pyrroloquinoline quinone biosynthesis protein D|][rast|416.8.peg.554||Coenzyme PQQ synthesis protein D|][proka|PROKKA_00536||pyrroloquinoline quinone biosynthesis protein PqqD|]
pgap	AYM39_02655	591070	591633	-	4	girp	564	0		591070		hypothetical protein		[img|Ga0113560_11541||Endonuclease, Uma2 family (restriction endonuclease fold)|][rast|416.8.peg.555||protein of unknown function DUF820|][proka|PROKKA_00537||hypothetical protein|]
pgap	AYM39_02660	591637	592365	-	4	girp	729	0		591637		pyrroloquinoline quinone biosynthesis protein C		[img|Ga0113560_11542|pqqC|pyrroloquinoline-quinone synthase|1.3.3.11][rast|416.8.peg.556||Pyrroloquinoline-quinone synthase (EC 1.3.3.11)|1.3.3.11][proka|PROKKA_00538|pqqC|Pyrroloquinoline-quinone synthase|1.3.3.11]
pgap	AYM39_02665	592379	593290	-	4	girp	912	0		592379		pyrroloquinoline quinone biosynthesis protein B		[img|Ga0113560_11543|pqqB|pyrroloquinoline quinone biosynthesis protein B|][rast|416.8.peg.557||Coenzyme PQQ synthesis protein B|][proka|PROKKA_00539|pqqB|Coenzyme PQQ synthesis protein B|]
pgap	AYM39_02670	593397	593471	-	2	gr	130.5	78.5		593397		pyrroloquinoline quinone biosynthesis protein PqqA		[rast|416.8.peg.558||Coenzyme PQQ synthesis protein A|]
pgap	AYM39_02675	593625	594413	-	4	girp	789	0		593625		hypothetical protein		[img|Ga0113560_11544||hypothetical protein|][rast|416.8.peg.559||Protein of unknown function DUF81|][proka|PROKKA_00540||Sulfite exporter TauE/SafE|]
pgap	AYM39_02680	594582	595820	+	4	girp	1239	0		595820	cca	multifunctional CCA tRNA nucleotidyl transferase/2'3'-cyclic phosphodiesterase/2'nucleotidase/phosphatase		[img|Ga0113560_11545||tRNA nucleotidyltransferase (CCA-adding enzyme)|3.1.4.-; 3.1.3.-; 2.7.7.72][rast|416.8.peg.560||tRNA nucleotidyltransferase (EC 2.7.7.21) (EC 2.7.7.25)|2.7.7.21][proka|PROKKA_00541|cca|Multifunctional CCA protein|]
pgap	AYM39_02685	595817	596167	+	4	girp	338.2	25.5		596167		hypothetical protein		[img|Ga0113560_11546||hypothetical protein|][rast|416.8.peg.561||FIG01199577: hypothetical protein|][proka|PROKKA_00542||hypothetical protein|]
pgap	AYM39_02690	596204	597070	+	4	girp	867	0		597070		rRNA methyltransferase		[img|Ga0113560_11547||23S rRNA (adenine2030-N6)-methyltransferase|2.1.1.266][rast|416.8.peg.562||Protein involved in catabolism of external DNA|][proka|PROKKA_00543|rlmJ|Ribosomal RNA large subunit methyltransferase J|2.1.1.266]
pgap	AYM39_02695	597073	597537	+	4	girp	465	0		597537		hypothetical protein		[img|Ga0113560_11548||hypothetical protein|][rast|416.8.peg.563||hypothetical protein|][proka|PROKKA_00544||hypothetical protein|]
pgap	AYM39_02700	597574	599010	+	4	girp	1437	0		599010	tldD	metalloprotease TldD		[img|Ga0113560_11549||TldD protein|][rast|416.8.peg.564||TldD protein, part of TldE/TldD proteolytic complex|][proka|PROKKA_00545||protease TldD|]
pgap	AYM39_02705	599069	600400	+	4	girp	1332	0		600400	pmbA	metalloprotease PmbA		[img|Ga0113560_11550||PmbA protein|][rast|416.8.peg.565||TldE protein, part of TldE/TldD proteolytic complex|][proka|PROKKA_00546||peptidase PmbA|]
pgap	AYM39_02710	600476	601006	-	4	girp	531	0		600476		hypothetical protein		[img|Ga0113560_11551||PEP-CTERM protein-sorting domain-containing protein|][rast|416.8.peg.566||hypothetical protein|][proka|PROKKA_00547||hypothetical protein|]
pgap	AYM39_02715	601183	602226	-	4	girp	1028.2	31.5		601183		dihydroorotate dehydrogenase		[img|Ga0113560_11552||dihydroorotate dehydrogenase|1.3.5.2][rast|416.8.peg.567||Dihydroorotate dehydrogenase (EC 1.3.3.1)|1.3.3.1][proka|PROKKA_00548|pyrD|Dihydroorotate dehydrogenase (quinone)|1.3.5.2]
pgap	AYM39_02720	602230	603330	-	4	girp	1101	0		602230		FAD-dependent oxidoreductase		[img|Ga0113560_11553||glycine oxidase|1.4.3.19][rast|416.8.peg.568||Glycine oxidase ThiO (EC 1.4.3.19)|1.4.3.19][proka|PROKKA_00549|hcnC|Hydrogen cyanide synthase subunit HcnC precursor|1.4.99.5]
img	Ga0113560_11554	603355	603465	+	2	ip	111	0		603465		hypothetical protein		[proka|PROKKA_00550||hypothetical protein|]
pgap	AYM39_02725	603645	604562	+	4	girp	918	0		604562		hypothetical protein		[img|Ga0113560_11555||hypothetical protein|][rast|416.8.peg.569||hypothetical protein|][proka|PROKKA_00551||hypothetical protein|]
pgap	AYM39_02730	604705	605652	+	4	girp	948	0		605652		proline iminopeptidase		[img|Ga0113560_11556||proline iminopeptidase|3.4.11.5][rast|416.8.peg.570||Proline iminopeptidase (EC 3.4.11.5)|3.4.11.5][proka|PROKKA_00552|pip|Proline iminopeptidase|3.4.11.5]
pgap	AYM39_02735	605654	606235	+	4	girp	582	0		606235		3-octaprenyl-4-hydroxybenzoate carboxy-lyase		[img|Ga0113560_11557||4-hydroxy-3-polyprenylbenzoate decarboxylase|4.1.1.98][rast|416.8.peg.571||3-polyprenyl-4-hydroxybenzoate carboxy-lyase UbiX (EC 4.1.1.-)|][proka|PROKKA_00553|bsdB|Phenolic acid decarboxylase subunit B|4.1.1.-]
pgap	AYM39_02740	606454	607101	+	4	girp	648	0		607101		3-hexulose-6-phosphate synthase		[img|Ga0113560_11558||3-hexulose-6-phosphate synthase/3-hexulose-6-phosphate synthase / 6-phospho-3-hexuloisomerase|5.3.1.27; 4.1.2.43; 4.1.2.43][rast|416.8.peg.572||D-arabino-3-hexulose 6-phosphate formaldehyde-lyase (EC 4.1.2.43)|4.1.2.43][proka|PROKKA_00554|rmpA_2|3-hexulose-6-phosphate synthase|4.1.2.43]
pgap	AYM39_02745	607253	609262	+	4	girp	1986	48		609262		transketolase		[img|Ga0113560_11559||transketolase|2.2.1.1][rast|416.8.peg.573||Transketolase (EC 2.2.1.1)|2.2.1.1][proka|PROKKA_00555|tktA_2|Transketolase 1|2.2.1.1]
pgap	AYM39_02750	609333	609617	+	1	g	285	0		609617		hypothetical protein
pgap	AYM39_02755	609718	611088	+	4	girp	1371	0		611088		hypothetical protein		[img|Ga0113560_11560||hypothetical protein|][rast|416.8.peg.574||Plectin 1|][proka|PROKKA_00556||hypothetical protein|]
pgap	AYM39_02760	611234	611581	+	4	girp	315.8	64.5		611581		hypothetical protein		[img|Ga0113560_11561||Protein of unknown function (DUF2782)|][rast|416.8.peg.575||hypothetical protein|][proka|PROKKA_00557||hypothetical protein|]
pgap	AYM39_02765	611633	612034	-	4	girp	402	0		611633		hypothetical protein		[img|Ga0113560_11562||hypothetical protein|][rast|416.8.peg.576||hypothetical protein|][proka|PROKKA_00558||hypothetical protein|]
pgap	AYM39_02770	612227	612508	+	4	girp	282	0		612508		hypothetical protein		[img|Ga0113560_11563||hypothetical protein|][rast|416.8.peg.577||hypothetical protein|][proka|PROKKA_00559||hypothetical protein|]
pgap	AYM39_02775	612521	613252	+	4	girp	717	30		613252		pteridine reductase		[img|Ga0113560_11564||pteridine reductase|1.5.1.33][rast|416.8.peg.578||FolM Alternative dihydrofolate reductase 1|][proka|PROKKA_00560|fabG_1|3-oxoacyl-[acyl-carrier-protein] reductase FabG|1.1.1.100]
pgap	AYM39_02780	613304	613798	-	4	girp	495	0		613304		2-amino-4-hydroxy-6- hydroxymethyldihydropteridine pyrophosphokinase		[img|Ga0113560_11565|| 2-amino-4-hydroxy-6-hydroxymethyldihydropteridine diphosphokinase|2.7.6.3][rast|416.8.peg.579||2-amino-4-hydroxy-6- hydroxymethyldihydropteridine pyrophosphokinase (EC 2.7.6.3)|2.7.6.3][proka|PROKKA_00561|folK_1|2-amino-4-hydroxy-6- hydroxymethyldihydropteridine pyrophosphokinase|2.7.6.3]
pgap	AYM39_02785	613803	614156	-	4	girp	354	0		613803		dihydroneopterin aldolase		[img|Ga0113560_11566||dihydroneopterin aldolase|4.1.2.25][rast|416.8.peg.580||Dihydroneopterin aldolase (EC 4.1.2.25)|4.1.2.25][proka|PROKKA_00562|folB|Dihydroneopterin aldolase|4.1.2.25]
pgap	AYM39_02790	614249	614821	+	4	girp	573	0		614821		acyl-phosphate glycerol 3-phosphate acyltransferase		[img|Ga0113560_11567||glycerol-3-phosphate acyltransferase PlsY|2.3.1.15][rast|416.8.peg.581||Acyl-phosphate:glycerol-3-phosphate O-acyltransferase PlsY|][proka|PROKKA_00563|plsY|putative glycerol-3-phosphate acyltransferase|2.3.1.15]
pgap	AYM39_02795	614822	615832	-	4	girp	1011	0		614822		tRNA N6-adenosine(37)-threonylcarbamoyltransferase complex transferase subunit TsaD		[img|Ga0113560_11568||N6-L-threonylcarbamoyladenine synthase|2.3.1.234][rast|416.8.peg.582||TsaD/Kae1/Qri7 protein, required for threonylcarbamoyladenosine t(6)A37 formation in tRNA|][proka|PROKKA_00564|tsaD|tRNA N6-adenosine threonylcarbamoyltransferase|2.3.1.-]
pgap	AYM39_02800	615937	616170	+	4	girp	234	0		616170	rpsU	30S ribosomal protein S21		[img|Ga0113560_11569|rpsU|small subunit ribosomal protein S21|][rast|416.8.peg.583||SSU ribosomal protein S21p|][proka|PROKKA_00565|rpsU|30S ribosomal protein S21|]
pgap	AYM39_02805	616180	616629	+	4	girp	450	0		616629		glutamyl-tRNA amidotransferase		[img|Ga0113560_11570||hypothetical protein|][rast|416.8.peg.584||Transamidase GatB domain protein|][proka|PROKKA_00566||Yqey-like protein|]
pgap	AYM39_02810	616645	618387	+	4	girp	1743	0		618387		DNA primase		[img|Ga0113560_11571||DNA primase|2.7.7.-][rast|416.8.peg.585||DNA primase (EC 2.7.7.-)|][proka|PROKKA_00567|dnaG|DNA primase|2.7.7.-]
pgap	AYM39_02815	618545	620356	+	4	girp	1812	0		620356		RNA polymerase subunit sigma-70		[img|Ga0113560_11572||RNA polymerase primary sigma factor|][rast|416.8.peg.586||RNA polymerase sigma factor RpoD|][proka|PROKKA_00568|rpoD_1|RNA polymerase sigma factor RpoD|]
pgap	AYM39_02825	620536	621696	+	4	girp	1161	0		621696		S-adenosylmethionine synthetase		[img|Ga0113560_11574|metK|S-adenosylmethionine synthetase|2.5.1.6][rast|416.8.peg.587||S-adenosylmethionine synthetase (EC 2.5.1.6)|2.5.1.6][proka|PROKKA_00570|metK|S-adenosylmethionine synthase|2.5.1.6]
pgap	AYM39_02830	621716	623008	+	4	girp	1293	0		623008		adenosylhomocysteinase		[img|Ga0113560_11575|ahcY|adenosylhomocysteinase|3.3.1.1][rast|416.8.peg.588||Adenosylhomocysteinase (EC 3.3.1.1)|3.3.1.1][proka|PROKKA_00571|ahcY|Adenosylhomocysteinase|3.3.1.1]
pgap	AYM39_02835	623060	624412	+	4	girp	1292.2	40.5		624412		adenosylmethionine-8-amino-7-oxononanoate aminotransferase		[img|Ga0113560_11576||adenosylmethionine-8-amino-7-oxononanoate aminotransferase|2.6.1.62][rast|416.8.peg.589||Adenosylmethionine-8-amino-7-oxononanoate aminotransferase (EC 2.6.1.62)|2.6.1.62][proka|PROKKA_00572|bioA|Adenosylmethionine-8-amino-7-oxononanoate aminotransferase|2.6.1.62]
pgap	AYM39_02840	624412	625140	+	4	girp	729	0		625140		16S rRNA methyltransferase		[img|Ga0113560_11577||16S rRNA (uracil1498-N3)-methyltransferase|2.1.1.193][rast|416.8.peg.590||Ribosomal RNA small subunit methyltransferase E (EC 2.1.1.-)|][proka|PROKKA_00573|rsmE|Ribosomal RNA small subunit methyltransferase E|2.1.1.193]
pgap	AYM39_02845	625140	626021	+	4	girp	882	0		626021		abortive infection protein		[img|Ga0113560_11578||hypothetical protein|][rast|416.8.peg.591||membrane protein, putative|][proka|PROKKA_00574||CAAX amino terminal protease self- immunity|]
pgap	AYM39_02850	626131	626442	+	4	girp	313.5	3		626442		hypothetical protein		[img|Ga0113560_11579||hypothetical protein|][rast|416.8.peg.592||hypothetical protein|][proka|PROKKA_00575||hypothetical protein|]
img	Ga0113560_11580	626541	626756	-	2	ip	216	0		626541		hypothetical protein		[proka|PROKKA_00576||hypothetical protein|]
pgap	AYM39_02855	626470	626835	+	1	g	366	0		626835		hypothetical protein
pgap	AYM39_02860	627087	628166	+	4	girp	1071	47.1		628166		lytic transglycosylase		[img|Ga0113560_11581||membrane-bound lytic murein transglycosylase D|][rast|416.8.peg.593||Membrane-bound lytic murein transglycosylase D precursor (EC 3.2.1.-)|][proka|PROKKA_00577|mltD_1|Membrane-bound lytic murein transglycosylase D precursor|4.2.2.-]
pgap	AYM39_02865	628591	630462	+	4	girp	1989	78		630462		photosynthetic protein synthase I		[img|Ga0113560_11582||cytochrome c peroxidase|1.11.1.5][rast|416.8.peg.594||Cytochrome c551 peroxidase (EC 1.11.1.5)|1.11.1.5][proka|PROKKA_00578|ccp_2|Cytochrome c551 peroxidase precursor|1.11.1.5]
pgap	AYM39_02870	630571	631263	+	4	girp	694.5	3		631263		two-component system response regulator		[img|Ga0113560_11583||two-component system, OmpR family, phosphate regulon response regulator PhoB|][rast|416.8.peg.595||Phosphate regulon transcriptional regulatory protein PhoB (SphR)|][proka|PROKKA_00579|phoB|Phosphate regulon transcriptional regulatory protein PhoB|]
pgap	AYM39_02875	631270	632544	+	4	girp	1275	0		632544		histidine kinase		[img|Ga0113560_11584||two-component system, OmpR family, phosphate regulon sensor histidine kinase PhoR|2.7.13.3][rast|416.8.peg.596||Phosphate regulon sensor protein PhoR (SphS) (EC 2.7.13.3)|2.7.13.3][proka|PROKKA_00580|phoR_1|Phosphate regulon sensor protein PhoR|2.7.13.3]
pgap	AYM39_02880	632578	633042	-	4	girp	465	0		632578		hypothetical protein		[img|Ga0113560_11585||diguanylate cyclase (GGDEF) domain-containing protein|][rast|416.8.peg.597||diguanylate cyclase/phosphodiesterase (GGDEF & EAL domains) with PAS/PAC sensor(s)|][proka|PROKKA_00581|dosC_3|Diguanylate cyclase DosC|2.7.7.65]
pgap	AYM39_02885	633090	634682	-	4	girp	1593	0		633090		transposase		[img|Ga0113560_11586||Transposase|][rast|416.8.peg.598||Mobile element protein|][proka|PROKKA_00582||Transposase IS66 family protein|]
pgap	AYM39_02890	634767	635060	-	4	girp	330	24		634767		cytochrome O ubiquinol oxidase		[img|Ga0113560_11587||transposase|][rast|416.8.peg.599||unknown in ISEc8|][proka|PROKKA_00583||IS66 Orf2 like protein|]
img	Ga0113560_11588	635105	635428	-	2	ip	324	0		635105		hypothetical protein		[proka|PROKKA_00584||hypothetical protein|]
pgap	AYM39_02895	635379	637190	-	4	girp	1812	0		635379		hypothetical protein		[img|Ga0113560_11589||PAS domain S-box-containing protein|][rast|416.8.peg.600||diguanylate cyclase/phosphodiesterase (GGDEF & EAL domains) with PAS/PAC sensor(s)|][proka|PROKKA_00585|nifL_1|Nitrogen fixation regulatory protein|]
pgap	AYM39_02900	637356	638762	+	4	girp	1407	0		638762		hypothetical protein		[img|Ga0113560_11590||cytochrome d ubiquinol oxidase subunit I|1.10.3.-][rast|416.8.peg.601||Cytochrome d ubiquinol oxidase subunit I (EC 1.10.3.-)|][proka|PROKKA_00586|cydA_1|Cytochrome bd ubiquinol oxidase subunit 1|1.10.3.-]
pgap	AYM39_02905	638755	639843	+	4	girp	1089	0		639843		cytochrome d ubiquinol oxidase subunit II		[img|Ga0113560_11591||cytochrome d ubiquinol oxidase subunit II|1.10.3.-][rast|416.8.peg.602||Cytochrome d ubiquinol oxidase subunit II (EC 1.10.3.-)|][proka|PROKKA_00587|cydB_1|Cytochrome bd-I ubiquinol oxidase subunit 2|1.10.3.10]
pgap	AYM39_02910	639946	640524	+	4	girp	579	0		640524		hypothetical protein		[img|Ga0113560_11592||Uncharacterized membrane protein|][rast|416.8.peg.603||hypothetical protein|][proka|PROKKA_00588||hypothetical protein|]
pgap	AYM39_02915	640580	641074	+	4	girp	497.2	1.5		641074		damage-inducible protein CinA		[img|Ga0113560_11593||nicotinamide-nucleotide amidase|3.5.1.42][rast|416.8.peg.604||C-terminal domain of CinA type S; Protein Implicated in DNA repair function with RecA and MutS|][proka|PROKKA_00589|pncC_1|Nicotinamide-nucleotide amidohydrolase PncC|3.5.1.42]
pgap	AYM39_02920	641250	642035	+	4	girp	786	0		642035		peptidase		[img|Ga0113560_11594||Peptidase family M48|][rast|416.8.peg.606||Zn-dependent protease with chaperone function PA4632|][proka|PROKKA_00590|yfgC_1|TPR repeat-containing protein YfgC precursor|]
pgap	AYM39_02925	642039	643241	+	4	girp	1203	0		643241		succinyldiaminopimelate transaminase		[img|Ga0113560_11595||N-succinyldiaminopimelate aminotransferase|2.6.1.17][rast|416.8.peg.607||N-succinyl-L,L-diaminopimelate aminotransferase alternative (EC 2.6.1.17)|2.6.1.17][proka|PROKKA_00591|dapL|LL-diaminopimelate aminotransferase|2.6.1.83]
pgap	AYM39_02930	643365	644183	+	4	girp	819	0		644183	dapD	2,3,4,5-tetrahydropyridine-2,6-dicarboxylate N-succinyltransferase		[img|Ga0113560_11596|dapD|2,3,4,5-tetrahydropyridine-2-carboxylate N-succinyltransferase|2.3.1.117][rast|416.8.peg.608||2,3,4,5-tetrahydropyridine-2,6-dicarboxylate N-succinyltransferase (EC 2.3.1.117)|2.3.1.117][proka|PROKKA_00592|dapD|2,3,4,5-tetrahydropyridine-2,6-dicarboxylate N-succinyltransferase|2.3.1.117]
pgap	AYM39_02935	644266	644640	+	4	girp	375	0		644640		hypothetical protein		[img|Ga0113560_11597||Protein of unknown function (DUF1640)|][rast|416.8.peg.609||hypothetical protein|][proka|PROKKA_00593||hypothetical protein|]
pgap	AYM39_02940	644748	645485	-	4	girp	738	0		644748		hypothetical protein		[img|Ga0113560_11598||hypothetical protein|][rast|416.8.peg.610||hypothetical protein|][proka|PROKKA_00594||hypothetical protein|]
pgap	AYM39_02945	645735	646175	+	4	girp	441	0		646175		hypothetical protein		[img|Ga0113560_11599||hypothetical protein|][rast|416.8.peg.612||hypothetical protein|][proka|PROKKA_00595||hypothetical protein|]
pgap	AYM39_02950	646302	647615	+	4	girp	1335	42		647615		ribonuclease BN		[img|Ga0113560_11600||membrane protein|][rast|416.8.peg.613||Ribonuclease BN (EC 3.1.-.-)|][proka|PROKKA_00596||hypothetical protein|]
pgap	AYM39_02955	647786	648028	+	4	girp	243	0		648028		hypothetical protein		[img|Ga0113560_11601||hypothetical protein|][rast|416.8.peg.614||hypothetical protein|][proka|PROKKA_00597||hypothetical protein|]
pgap	AYM39_02960	648035	648373	+	4	girp	339	0		648373		arsenate reductase		[img|Ga0113560_11602||transcriptional regulator, Spx/MgsR family|][rast|416.8.peg.615||FIG138056: a glutathione-dependent thiol reductase|][proka|PROKKA_00598|mgsR|Regulatory protein MgsR|]
pgap	AYM39_02965	648373	649500	+	4	girp	1128	0		649500		succinyl-diaminopimelate desuccinylase		[img|Ga0113560_11603||succinyl-diaminopimelate desuccinylase|3.5.1.18][rast|416.8.peg.616||N-succinyl-L,L-diaminopimelate desuccinylase (EC 3.5.1.18)|3.5.1.18][proka|PROKKA_00599|dapE|Succinyl-diaminopimelate desuccinylase|3.5.1.18]
pgap	AYM39_02970	649929	652274	+	4	girp	2346	0		652274		hypothetical protein		[img|Ga0113560_11604||PAS domain S-box-containing protein/diguanylate cyclase (GGDEF) domain-containing protein|][rast|416.8.peg.617||diguanylate cyclase/phosphodiesterase (GGDEF & EAL domains) with PAS/PAC sensor(s)|][proka|PROKKA_00600|gmr_6|Cyclic di-GMP phosphodiesterase Gmr|3.1.4.52]
pgap	AYM39_02975	652321	653052	+	4	girp	732	0		653052		hypothetical protein		[img|Ga0113560_11605||TIGR00266 family protein|][rast|416.8.peg.618||DUF124 domain-containing protein|][proka|PROKKA_00601||hypothetical protein|]
pgap	AYM39_02980	653059	653733	-	4	girp	675	0		653059		hypothetical protein		[img|Ga0113560_11606||DNA repair protein RadC|][rast|416.8.peg.619||DNA repair protein RadC|][proka|PROKKA_00602||hypothetical protein|]
pgap	AYM39_02985	653815	655035	+	4	girp	1221	0		655035		phosphopantothenoylcysteine decarboxylase		[img|Ga0113560_11607||phosphopantothenoylcysteine decarboxylase / phosphopantothenate--cysteine ligase|6.3.2.5; 4.1.1.36][rast|416.8.peg.620||Phosphopantothenoylcysteine decarboxylase (EC 4.1.1.36) / Phosphopantothenoylcysteine synthetase (EC 6.3.2.5)|4.1.1.36; 6.3.2.5][proka|PROKKA_00603|coaBC|Coenzyme A biosynthesis bifunctional protein CoaBC|]
pgap	AYM39_02990	655007	655462	+	4	girp	456	0		655462		deoxyuridine 5'-triphosphate nucleotidohydrolase		[img|Ga0113560_11608||dUTP pyrophosphatase|3.6.1.23][rast|416.8.peg.621||Deoxyuridine 5'-triphosphate nucleotidohydrolase (EC 3.6.1.23)|3.6.1.23][proka|PROKKA_00604|dut|Deoxyuridine 5'-triphosphate nucleotidohydrolase|3.6.1.23]
pgap	AYM39_02995	655475	657979	+	4	girp	2505	0		657979		phosphoglucomutase		[img|Ga0113560_11609||phosphomannomutase / phosphoglucomutase|5.4.2.2; 5.4.2.8][rast|416.8.peg.622||Phosphomannomutase (EC 5.4.2.8) / Phosphoglucomutase (EC 5.4.2.2)|5.4.2.8; 5.4.2.2][proka|PROKKA_00605|algC|Phosphomannomutase/phosphoglucomutase|5.4.2.2]
pgap	AYM39_03005	658868	659815	-	4	girp	993	30		658868		hypothetical protein		[img|Ga0113560_11611||protein of unknown function (DUF4124)|][rast|416.8.peg.624||hypothetical protein|][proka|PROKKA_00607||hypothetical protein|]
pgap	AYM39_03000	657992	658885	+	4	girp	894	0		658885		acetylglutamate kinase		[img|Ga0113560_11610||acetylglutamate kinase|2.7.2.8][rast|416.8.peg.623||Acetylglutamate kinase (EC 2.7.2.8)|2.7.2.8][proka|PROKKA_00606|argB|Acetylglutamate kinase|2.7.2.8]
pgap	AYM39_03010	659891	660466	-	4	girp	576	0		659891		hypothetical protein		[img|Ga0113560_11612||YggT family protein|][rast|416.8.peg.625||Integral membrane protein YggT, involved in response to extracytoplasmic stress (osmotic shock)|][proka|PROKKA_00608||YGGT family protein|]
pgap	AYM39_03015	660466	661293	-	4	girp	828	0		660466		pyrroline-5-carboxylate reductase		[img|Ga0113560_11613||pyrroline-5-carboxylate reductase|1.5.1.2][rast|416.8.peg.626||Pyrroline-5-carboxylate reductase (EC 1.5.1.2)|1.5.1.2][proka|PROKKA_00609|proC|Pyrroline-5-carboxylate reductase|1.5.1.2]
pgap	AYM39_03020	661379	662884	-	4	girp	1537.5	21		661379		murein biosynthesis protein MurJ		[img|Ga0113560_11614||putative peptidoglycan lipid II flippase|][rast|416.8.peg.627||Proposed peptidoglycan lipid II flippase MurJ|][proka|PROKKA_00610|murJ|putative peptidoglycan biosynthesis protein MurJ|]
pgap	AYM39_03025	663027	663290	+	4	girp	264	0		663290		30S ribosomal protein S20		[img|Ga0113560_11615|rpsT|small subunit ribosomal protein S20|][rast|416.8.peg.628||SSU ribosomal protein S20p|][proka|PROKKA_00611|rpsT|30S ribosomal protein S20|]
pgap	AYM39_03030	663618	664634	+	4	girp	1017	0		664634		oxidoreductase		[img|Ga0113560_11616||Predicted dehydrogenase|][rast|416.8.peg.630||oxidoreductase|][proka|PROKKA_00612|afr_1|1,5-anhydro-D-fructose reductase|1.1.1.292]
pgap	AYM39_03035	664683	667256	-	4	girp	2574	0		664683		ATP-dependent chaperone ClpB		[img|Ga0113560_11617|clpB|ATP-dependent Clp protease ATP-binding subunit ClpB|][rast|416.8.peg.631||ClpB protein|][proka|PROKKA_00613|clpB_1|Chaperone protein ClpB|]
img	Ga0113560_11618	667531	667734	+	3	irp	204	0		667734	cspD	cold shock protein (beta-ribbon, CspA family)		[rast|416.8.peg.632||Cold shock protein CspD|][proka|PROKKA_00614|cspD_1|Cold shock-like protein CspD|]
pgap	AYM39_03040	667868	668791	+	4	girp	924	0		668791		hypothetical protein		[img|Ga0113560_11619||hypothetical protein|][rast|416.8.peg.633||Elongation factor-1 alpha|][proka|PROKKA_00615||hypothetical protein|]
pgap	AYM39_03050	669152	670003	-	4	girp	852	0		669152		radical SAM protein		[img|Ga0113560_11621||Radical SAM superfamily protein|][rast|416.8.peg.635||Radical SAM domain protein|][proka|PROKKA_00617||Radical SAM superfamily protein|]
pgap	AYM39_03045	668901	669155	+	4	girp	255	0		669155		hypothetical protein		[img|Ga0113560_11620||hypothetical protein|][rast|416.8.peg.634||hypothetical protein|][proka|PROKKA_00616||hypothetical protein|]
pgap	AYM39_03055	670058	670873	-	4	girp	816	0		670058		formylmethanofuran dehydrogenase subunit C		[img|Ga0113560_11622||formylmethanofuran dehydrogenase subunit C|1.2.99.5][rast|416.8.peg.636||Formylmethanofuran dehydrogenase (tungsten) subunit C (EC 1.2.99.5)|1.2.99.5][proka|PROKKA_00618|fhcC|Formyltransferase/hydrolase complex Fhc subunit C|]
pgap	AYM39_03060	670870	671766	-	4	girp	897	0		670870		formylmethanofuran--tetrahydromethanopterin N-formyltransferase		[img|Ga0113560_11623|ffsA|formylmethanofuran--tetrahydromethanopterin N-formyltransferase|2.3.1.101][rast|416.8.peg.637||Formylmethanofuran--tetrahydromethanopterin N-formyltransferase (EC 2.3.1.101)|2.3.1.101][proka|PROKKA_00619|fhcD|Formyltransferase/hydrolase complex subunit D|2.3.1.101]
pgap	AYM39_03065	671816	672481	-	4	girp	666	0		671816		hypothetical protein		[img|Ga0113560_11624||Methyltransferase small domain-containing protein|][rast|416.8.peg.638||Protein-N(5)-glutamine methyltransferase PrmC, methylates polypeptide chain release factors RF1 and RF2|][proka|PROKKA_00620||ribosomal protein L11 methyltransferase|]
pgap	AYM39_03070	672846	673535	-	3	gip	690	0		672846		hypothetical protein		[img|Ga0113560_11625||HNH endonuclease|][proka|PROKKA_00621||HNH endonuclease|]
pgap	AYM39_03075	674201	674584	-	3	gip	384	0		674201		hypothetical protein		[img|Ga0113560_11626||hypothetical protein|][proka|PROKKA_00622||hypothetical protein|]
pgap	AYM39_03080	674581	674877	-	4	girp	297	0		674581		hypothetical protein		[img|Ga0113560_11627||Protein of unknown function (DUF1640)|][rast|416.8.peg.640||Phage protein|][proka|PROKKA_00623||hypothetical protein|]
pgap	AYM39_03085	674877	676541	-	4	girp	1665	0		674877		formylmethanofuran dehydrogenase subunit A		[img|Ga0113560_11628||formylmethanofuran dehydrogenase subunit A|1.2.99.5][rast|416.8.peg.641||Formylmethanofuran dehydrogenase subunit A (EC 1.2.99.5)|1.2.99.5][proka|PROKKA_00624|fhcA|Formyltransferase/hydrolase complex Fhc subunit A|3.5.1.-]
pgap	AYM39_03090	676551	677810	-	4	girp	1260	0		676551		formylmethanofuran dehydrogenase subunit B		[img|Ga0113560_11629||formylmethanofuran dehydrogenase subunit B|1.2.99.5][rast|416.8.peg.642||Formylmethanofuran dehydrogenase subunit B (EC 1.2.99.5)|1.2.99.5][proka|PROKKA_00625|fhcB|Formyltransferase/hydrolase complex Fhc subunit B|]
pgap	AYM39_03095	677821	678198	-	4	girp	378	0		677821		pterin dehydratase		[img|Ga0113560_11630||4a-hydroxytetrahydrobiopterin dehydratase|4.2.1.96][rast|416.8.peg.643||Pterin-4-alpha-carbinolamine dehydratase (EC 4.2.1.96)|4.2.1.96][proka|PROKKA_00626||Putative pterin-4-alpha-carbinolamine dehydratase|4.2.1.96]
img	Ga0113560_11631	678410	678544	-	3	irp	135	0		678410		hypothetical protein		[rast|416.8.peg.645||hypothetical protein|][proka|PROKKA_00627||hypothetical protein|]
pgap	AYM39_03100	678650	678847	+	4	girp	195.8	17		678847		hypothetical protein		[img|Ga0113560_11632||hypothetical protein|][rast|416.8.peg.646||hypothetical protein|][proka|PROKKA_00628||hypothetical protein|]
img	Ga0113560_11633	678899	679090	-	3	irp	192	0		678899		hypothetical protein		[rast|416.8.peg.647||hypothetical protein|][proka|PROKKA_00629||hypothetical protein|]
pgap	AYM39_03105	679512	679808	+	4	girp	297	0		679808		glyoxalase		[img|Ga0113560_11634||Glyoxalase/Bleomycin resistance protein/Dioxygenase superfamily protein|][rast|416.8.peg.648||Glyoxalase/bleomycin resistance protein/dioxygenase|][proka|PROKKA_00630||Glyoxalase-like domain protein|]
pgap	AYM39_03110	679818	680327	-	4	girp	510	0		679818		hypothetical protein		[img|Ga0113560_11635||DnaJ domain-containing protein|][rast|416.8.peg.649||hypothetical protein|][proka|PROKKA_00631||Dna-J like membrane chaperone protein|]
pgap	AYM39_03115	680472	681155	-	4	girp	684	0		680472		PKHD-type hydroxylase		[img|Ga0113560_11636||PKHD-type hydroxylase|1.14.11.-][rast|416.8.peg.650||Iron-uptake factor PiuC|][proka|PROKKA_00632||PKHD-type hydroxylase|1.14.11.-]
pgap	AYM39_03120	681159	681869	-	4	girp	711	0		681159		peptidase		[img|Ga0113560_11637||hypothetical protein|][rast|416.8.peg.651||Probable transmembrane protein|][proka|PROKKA_00633||hypothetical protein|]
pgap	AYM39_03125	681936	684125	-	4	girp	2190	0		681936		TonB-dependent receptor		[img|Ga0113560_11638||catecholate siderophore receptor|][rast|416.8.peg.652||TonB-dependent siderophore receptor|][proka|PROKKA_00634|bfrD|putative TonB-dependent receptor BfrD precursor|]
pgap	AYM39_03130	684591	684824	+	4	girp	234	0		684824		hypothetical protein		[img|Ga0113560_11639||hypothetical protein|][rast|416.8.peg.653||hypothetical protein|][proka|PROKKA_00635||hypothetical protein|]
pgap	AYM39_03135	684821	685069	+	4	girp	249	0		685069		hypothetical protein		[img|Ga0113560_11640||hypothetical protein|][rast|416.8.peg.654||hypothetical protein|][proka|PROKKA_00636||hypothetical protein|]
pgap	AYM39_03140	685080	685373	+	4	girp	294	0		685373		hypothetical protein		[img|Ga0113560_11641||hypothetical protein|][rast|416.8.peg.655||hypothetical protein|][proka|PROKKA_00637||hypothetical protein|]
img	Ga0113560_11642	685381	685545	-	3	irp	161	6.9		685381		hypothetical protein		[rast|416.8.peg.656||hypothetical protein|][proka|PROKKA_00638||hypothetical protein|]
pgap	AYM39_03145	685914	686540	-	3	gip	627	0		685914		hypothetical protein		[img|Ga0113560_11643||hypothetical protein|][proka|PROKKA_00639||hypothetical protein|]
pgap	AYM39_03150	686537	686800	-	3	gip	162	88.3		686537		hypothetical protein		[img|Ga0113560_11644||hypothetical protein|][proka|PROKKA_00640||hypothetical protein|]
pgap	AYM39_03155	686935	687747	-	4	girp	813	0		686935		hemin ABC transporter ATP-binding protein		[img|Ga0113560_11645||iron complex transport system ATP-binding protein|3.6.3.34][rast|416.8.peg.658||ABC-type hemin transport system, ATPase component|][proka|PROKKA_00641|hmuV|Hemin import ATP-binding protein HmuV|3.6.3.-]
pgap	AYM39_03160	687749	688843	-	4	girp	1095	0		687749		heme ABC transporter permease		[img|Ga0113560_11646||iron complex transport system permease protein|][rast|416.8.peg.659||Hemin ABC transporter, permease protein|][proka|PROKKA_00642|hmuU|Hemin transport system permease protein HmuU|]
pgap	AYM39_03165	688840	689736	-	4	girp	897	0		688840		ABC transporter substrate-binding protein		[img|Ga0113560_11647||iron complex transport system substrate-binding protein|][rast|416.8.peg.660||Periplasmic hemin-binding protein|][proka|PROKKA_00643|hmuT|Hemin-binding periplasmic protein HmuT precursor|]
pgap	AYM39_03170	689754	690290	-	4	girp	537	0		689754		pyridoxamine 5'-phosphate oxidase		[img|Ga0113560_11648||hypothetical protein|][rast|416.8.peg.661||Pyridoxamine 5'-phosphate oxidase-related putative heme iron utilization protein # hutZ|][proka|PROKKA_00644||Pyridoxamine 5'-phosphate oxidase|]
pgap	AYM39_03175	690324	691340	-	4	girp	1017	0		690324		hypothetical protein		[img|Ga0113560_11649||putative hemin transport protein|][rast|416.8.peg.662||Hemin transport protein HmuS|][proka|PROKKA_00645|hemS|Hemin transport protein HemS|]
pgap	AYM39_03180	691432	692163	-	4	girp	732	0		691432		exosortase		[img|Ga0113560_11650||VPLPA-CTERM protein sorting domain-containing protein|][rast|416.8.peg.663||InterPro IPR000566|][proka|PROKKA_00646||hypothetical protein|]
pgap	AYM39_03185	692309	692539	-	4	girp	231	0		692309		hypothetical protein		[img|Ga0113560_11651||hypothetical protein|][rast|416.8.peg.665||hypothetical protein|][proka|PROKKA_00647||hypothetical protein|]
pgap	AYM39_03190	692551	694803	-	4	girp	2370	78		692551		TonB-dependent receptor		[img|Ga0113560_11652||hemoglobin/transferrin/lactoferrin receptor protein|][rast|416.8.peg.666||TonB-dependent hemin , ferrichrome receptor|][proka|PROKKA_00648|hgpA|Hemoglobin and hemoglobin-haptoglobin-binding protein A precursor|]
pgap	AYM39_03195	695309	695593	-	3	gip	249	31.2		695309		hypothetical protein		[img|Ga0113560_11653||hypothetical protein|][proka|PROKKA_00649||hypothetical protein|]
pgap	AYM39_03200	695539	696663	-	4	girp	1107	36		695539		hypothetical protein		[img|Ga0113560_11654||Uncharacterized iron-regulated membrane protein|][rast|416.8.peg.667||Uncharacterized iron-regulated membrane protein; Iron-uptake factor PiuB|][proka|PROKKA_00650||PepSY-associated TM helix|]
pgap	AYM39_03205	696676	698823	-	4	girp	2175	31.2		696676		hypothetical protein		[img|Ga0113560_11655||iron complex outermembrane recepter protein|][rast|416.8.peg.668||Ferrichrome-iron receptor|][proka|PROKKA_00651|fhuA_2|Ferrichrome-iron receptor precursor|]
pgap	AYM39_03210	699142	699567	-	4	girp	426	0		699142		biopolymer transporter ExbD		[img|Ga0113560_11656||biopolymer transport protein ExbD|][rast|416.8.peg.669||Biopolymer transport protein ExbD/TolR|][proka|PROKKA_00652|exbD_1|Biopolymer transport protein ExbD|]
pgap	AYM39_03215	699567	700310	-	4	girp	744	0		699567		biopolymer transporter ExbB		[img|Ga0113560_11657||biopolymer transport protein ExbB|][rast|416.8.peg.670||MotA/TolQ/ExbB proton channel family protein|][proka|PROKKA_00653|exbB_1|Biopolymer transport protein ExbB|]
pgap	AYM39_03220	700315	701094	-	4	girp	780	0		700315		hypothetical protein		[img|Ga0113560_11658||protein TonB|][rast|416.8.peg.671||Ferric siderophore transport system, periplasmic binding protein TonB|][proka|PROKKA_00654||transport protein TonB|]
pgap	AYM39_03225	701172	701348	-	4	girp	177	0		701172		hemin transporter HemP		[img|Ga0113560_11659||Hemin uptake protein hemP|][rast|416.8.peg.672||hypothetical protein|][proka|PROKKA_00655||hypothetical protein|]
pgap	AYM39_03230	701357	701635	-	4	girp	279	0		701357		hypothetical protein		[img|Ga0113560_11660||hypothetical protein|][rast|416.8.peg.673||hypothetical protein|][proka|PROKKA_00656||hypothetical protein|]
pgap	AYM39_03235	702706	703134	+	1	g	429	0		703134		hypothetical protein
pgap	AYM39_03240	703320	704417	+	4	girp	1098	0		704417		transposase		[img|Ga0113560_11661||Transposase|][rast|416.8.peg.676||Mobile element protein|][proka|PROKKA_00657||Transposase DDE domain protein|]
pgap	AYM39_03245	705073	705582	+	4	girp	412.5	195		705582		hypothetical protein		[img|Ga0113560_11662||hypothetical protein|][rast|416.8.peg.677||hypothetical protein|][proka|PROKKA_00658||hypothetical protein|]
pgap	AYM39_03250	706711	708333	-	4	girp	1623	0		706711	groEL	molecular chaperone GroEL		[img|Ga0113560_11663||chaperonin GroEL|][rast|416.8.peg.678||Heat shock protein 60 family chaperone GroEL|][proka|PROKKA_00659|groL_1|60 kDa chaperonin|]
pgap	AYM39_03255	708393	708683	-	4	girp	291	0		708393		co-chaperone GroES		[img|Ga0113560_11664||chaperonin GroES|][rast|416.8.peg.679||Heat shock protein 60 family co-chaperone GroES|][proka|PROKKA_00660|groS_1|10 kDa chaperonin|]
pgap	AYM39_03260	708975	711722	-	4	girp	2748	0		708975		response regulator receiver protein		[img|Ga0113560_11665||PAS domain S-box-containing protein/diguanylate cyclase (GGDEF) domain-containing protein|][rast|416.8.peg.681||diguanylate cyclase/phosphodiesterase (GGDEF & EAL domains) with PAS/PAC sensor(s)|][proka|PROKKA_00661|cph2_1|Phytochrome-like protein cph2|]
pgap	AYM39_03265	711719	714664	-	4	girp	2946	0		711719		hypothetical protein		[img|Ga0113560_11666||PAS domain S-box-containing protein|][rast|416.8.peg.682||Chemotaxis protein methyltransferase CheR (EC 2.1.1.80)|2.1.1.80][proka|PROKKA_00662|bvgS|Virulence sensor protein BvgS precursor|2.7.13.3]
pgap	AYM39_03270	714668	715273	-	4	girp	606	0		714668		hypothetical protein		[img|Ga0113560_11667||protein of unknown function (DUF4154)|][rast|416.8.peg.683||putative transmembrane protein|][proka|PROKKA_00663||hypothetical protein|]
pgap	AYM39_03275	715287	717662	-	4	girp	2377.5	1.7		715287		TonB-dependent receptor		[img|Ga0113560_11668||iron complex outermembrane recepter protein|][rast|416.8.peg.684||Ferrichrome-iron receptor|][proka|PROKKA_00664|fhuE|FhuE receptor precursor|]
pgap	AYM39_03280	717802	720678	-	4	girp	2877	0		717802		glutamine-synthetase adenylyltransferase		[img|Ga0113560_11669||glutamate-ammonia-ligase adenylyltransferase|2.7.7.42][rast|416.8.peg.685||Glutamate-ammonia-ligase adenylyltransferase (EC 2.7.7.42)|2.7.7.42][proka|PROKKA_00665|glnE|Glutamate-ammonia-ligase adenylyltransferase|2.7.7.42]
pgap	AYM39_03285	720845	721324	+	4	girp	480	0		721324		hypothetical protein		[img|Ga0113560_11670||Cytochrome C'|][rast|416.8.peg.686||hypothetical protein|][proka|PROKKA_00666||hypothetical protein|]
pgap	AYM39_03290	721350	722810	+	4	girp	1473	13.9		722810		porin		[img|Ga0113560_11671||Porin subfamily protein|][rast|416.8.peg.687||hypothetical protein|][proka|PROKKA_00667||Porin subfamily protein|]
pgap	AYM39_03295	723051	724148	-	4	girp	1098	0		723051		transposase		[img|Ga0113560_11672||Transposase|][rast|416.8.peg.688||Mobile element protein|][proka|PROKKA_00668||Transposase DDE domain protein|]
pgap	AYM39_03305	724608	726128	-	4	girp	1557	24		724608		ubiquinone biosynthesis regulatory protein kinase UbiB		[img|Ga0113560_11673||ubiquinone biosynthesis protein|][rast|416.8.peg.689||Ubiquinone biosynthesis monooxygenase UbiB|][proka|PROKKA_00669|ubiB|putative protein kinase UbiB|2.7.-.-]
pgap	AYM39_03300	724417	724611	+	1	g	195	0		724611		hypothetical protein
pgap	AYM39_03310	726189	726824	-	4	girp	636	0		726189		sterol-binding protein		[img|Ga0113560_11674||ubiquinone biosynthesis protein UbiJ|][rast|416.8.peg.690||Protein YigP (COG3165) clustered with ubiquinone biosynthetic genes|][proka|PROKKA_00670||SCP-2 sterol transfer family protein|]
pgap	AYM39_03315	726825	727364	-	4	girp	540	0		726825		hypothetical protein		[img|Ga0113560_11675||Endonuclease, Uma2 family (restriction endonuclease fold)|][rast|416.8.peg.691||hypothetical protein|][proka|PROKKA_00671||hypothetical protein|]
pgap	AYM39_03320	727398	728147	-	4	girp	750	0		727398	ubiE	bifunctional demethylmenaquinone methyltransferase/2-methoxy-6-polyprenyl-1,4-benzoquinol methylase		[img|Ga0113560_11676|ubiE|demethylmenaquinone methyltransferase / 2-methoxy-6-polyprenyl-1,4-benzoquinol methylase|2.1.1.201; 2.1.1.163][rast|416.8.peg.692||Ubiquinone/menaquinone biosynthesis methyltransferase UbiE (EC 2.1.1.-)|][proka|PROKKA_00672|ubiE_1|Ubiquinone/menaquinone biosynthesis C-methyltransferase UbiE|2.1.1.163]
pgap	AYM39_03325	728156	728545	-	4	girp	390	0		728156		1-(5-phosphoribosyl)-5-((5- phosphoribosylamino)methylideneamino)imidazole-4- carboxamide isomerase		[img|Ga0113560_11677||DUF971 family protein|][rast|416.8.peg.693||COG3536: Uncharacterized protein conserved in bacteria|][proka|PROKKA_00673||hypothetical protein|]
pgap	AYM39_03330	728552	729871	-	4	girp	1317.8	4.5		728552	hslU	ATP-dependent protease ATP-binding subunit HslU		[img|Ga0113560_11678|hslU|ATP-dependent HslUV protease ATP-binding subunit HslU|][rast|416.8.peg.694||ATP-dependent hsl protease ATP-binding subunit HslU|][proka|PROKKA_00674|hslU|ATP-dependent protease ATPase subunit HslU|]
pgap	AYM39_03335	729875	730438	-	4	girp	564	0		729875		ATP-dependent protease subunit HslV		[img|Ga0113560_11679|hslV|ATP-dependent HslUV protease, peptidase subunit HslV|3.4.25.2][rast|416.8.peg.695||ATP-dependent protease HslV (EC 3.4.25.-)|][proka|PROKKA_00675|hslV|ATP-dependent protease subunit HslV|3.4.25.2]
pgap	AYM39_03340	730652	731089	+	4	girp	438	0		731089		hypothetical protein		[img|Ga0113560_11680||hypothetical protein|][rast|416.8.peg.696||hypothetical protein|][proka|PROKKA_00676||hypothetical protein|]
pgap	AYM39_03345	731244	731891	-	4	girp	648	0		731244		hypothetical protein		[img|Ga0113560_11681||PEP-CTERM protein-sorting domain-containing protein|][rast|416.8.peg.697||hypothetical protein|][proka|PROKKA_00677||hypothetical protein|]
pgap	AYM39_03350	732623	733129	+	4	girp	462	90		733129		hypothetical protein		[img|Ga0113560_11682||VPLPA-CTERM protein sorting domain-containing protein|][rast|416.8.peg.698||hypothetical protein|][proka|PROKKA_00678||hypothetical protein|]
pgap	AYM39_03360	734078	735589	-	4	girp	1512	0		734078		radical SAM protein		[img|Ga0113560_11684||Radical SAM superfamily enzyme YgiQ, UPF0313 family|][rast|416.8.peg.701||Mg-protoporphyrin IX monomethyl ester oxidative cyclase|][proka|PROKKA_00680||coproporphyrinogen III oxidase|]
pgap	AYM39_03355	733248	734090	+	4	girp	793.5	99		734090		NAD(P)-dependent oxidoreductase		[img|Ga0113560_11683||Nucleoside-diphosphate-sugar epimerase|][rast|416.8.peg.700||Nucleoside-diphosphate-sugar epimerases|][proka|PROKKA_00679||NAD dependent epimerase/dehydratase family protein|]
pgap	AYM39_03365	735804	736514	+	4	girp	720	6		736514		hypothetical protein		[img|Ga0113560_11685||hypothetical protein|][rast|416.8.peg.702||hypothetical protein|][proka|PROKKA_00681||hypothetical protein|]
pgap	AYM39_03370	736517	737293	+	4	girp	777	0		737293		alpha/beta hydrolase		[img|Ga0113560_11686||esterase|3.1.-][rast|416.8.peg.703||Hydrolase, alpha/beta fold family|][proka|PROKKA_00682|ybfF|Esterase YbfF|3.1.-.-]
pgap	AYM39_03375	737396	737797	+	4	girp	402	0		737797		hypothetical protein		[img|Ga0113560_11687||hypothetical protein|][rast|416.8.peg.704||hypothetical protein|][proka|PROKKA_00683||hypothetical protein|]
pgap	AYM39_03380	737839	739068	+	4	girp	1230	0		739068		pyrophosphate--fructose-6-phosphate 1-phosphotransferase		[img|Ga0113560_11688|pfp|pyrophosphate--fructose-6-phosphate 1-phosphotransferase|2.7.1.90][rast|416.8.peg.705||Pyrophosphate-dependent fructose 6-phosphate-1-kinase (EC 2.7.1.90)|2.7.1.90][proka|PROKKA_00684|pfp|Pyrophosphate--fructose 6-phosphate 1-phosphotransferase|2.7.1.90]
pgap	AYM39_03385	739418	739768	+	4	girp	294.8	37.5		739768		hypothetical protein		[img|Ga0113560_11689||hypothetical protein|][rast|416.8.peg.707||hypothetical protein|][proka|PROKKA_00685||hypothetical protein|]
pgap	AYM39_03390	739777	740004	+	4	girp	227.2	1.5		740004		hypothetical protein		[img|Ga0113560_11690||hypothetical protein|][rast|416.8.peg.708||hypothetical protein|][proka|PROKKA_00686||hypothetical protein|]
pgap	AYM39_03400	740738	744331	-	4	girp	3594	0		740738		hypothetical protein		[img|Ga0113560_11692||PAS domain S-box-containing protein|][rast|416.8.peg.710||Sensor histidine kinase/response regulator (EC 2.7.3.-)|][proka|PROKKA_00688|rpfC_1|Sensory/regulatory protein RpfC|2.7.13.3]
pgap	AYM39_03395	740028	740747	+	4	girp	720	0		740747		hypothetical protein		[img|Ga0113560_11691||diguanylate cyclase (GGDEF) domain-containing protein|][rast|416.8.peg.709||diguanylate cyclase/phosphodiesterase (GGDEF & EAL domains) with PAS/PAC sensor(s)|][proka|PROKKA_00687|pleD_2|Response regulator PleD|]
pgap	AYM39_03405	744398	745045	-	4	girp	657	6		744398		hypothetical protein		[img|Ga0113560_11693||Two-component response regulator, FixJ family, consists of REC and HTH domains|][rast|416.8.peg.711||Two-component response regulator|][proka|PROKKA_00689|tdiR|Transcriptional regulatory protein TdiR|]
pgap	AYM39_03410	745327	745803	+	4	girp	457.5	39		745803		hypothetical protein		[img|Ga0113560_11694||CBS domain-containing protein|][rast|416.8.peg.712||CBS domain protein|][proka|PROKKA_00690|hrp1|Hypoxic response protein 1|]
img	Ga0113560_11695	745999	746715	-	3	irp	688	50.2		745999		Two-component response regulator, FixJ family, consists of REC and HTH domains		[rast|416.8.peg.713||Nitrogen regulation protein NR(I)|][proka|PROKKA_00691|fixJ_1|Transcriptional regulatory protein FixJ|]
pgap	AYM39_03415	746068	746661	-	1	g	594	0	pseudo	746068		[PSEUDO_pgap: hypothetical protein]
pgap	AYM39_03420	746898	749159	-	4	girp	2247	30		746898		hypothetical protein		[img|Ga0113560_11696||PAS domain S-box-containing protein|][rast|416.8.peg.714||Two-component hybrid sensor and regulator|][proka|PROKKA_00692|luxQ_1|Autoinducer 2 sensor kinase/phosphatase LuxQ|2.7.13.3]
pgap	AYM39_03425	749480	751501	+	4	girp	2022	0		751501		hypothetical protein		[img|Ga0113560_11697||1,4-alpha-glucan branching enzyme|][rast|416.8.peg.715||1,4-alpha-glucan branching enzyme (EC 2.4.1.18)|2.4.1.18][proka|PROKKA_00693|amyX|Pullulanase|3.2.1.41]
pgap	AYM39_03430	751885	752508	-	3	gip	624	0		751885		hypothetical protein		[img|Ga0113560_11698||hypothetical protein|][proka|PROKKA_00694||hypothetical protein|]
pgap	AYM39_03435	752780	753610	-	4	girp	741	103.9		752780		hypothetical protein		[img|Ga0113560_11699||hypothetical protein|][rast|416.8.peg.716||hypothetical protein|][proka|PROKKA_00695||hypothetical protein|]
pgap	AYM39_03440	753793	755157	-	4	girp	1365	0		753793		transposase		[img|Ga0113560_11700||Transposase DDE domain group 1|][rast|416.8.peg.717||Mobile element protein|][proka|PROKKA_00696||hypothetical protein|]
pgap	AYM39_03445	755422	756519	-	4	girp	1098	0		755422		transposase		[img|Ga0113560_11701||Transposase|][rast|416.8.peg.718||Mobile element protein|][proka|PROKKA_00697||Transposase DDE domain protein|]
pgap	AYM39_03450	756717	757220	-	4	girp	810	204		756717		hypothetical protein		[img|Ga0113560_11702||hypothetical protein|][rast|416.8.peg.719||hypothetical protein|][proka|PROKKA_00698||hypothetical protein|]
pgap	AYM39_03455	758489	758956	-	4	girp	468	0		758489		hypothetical protein		[img|Ga0113560_11703||hypothetical protein|][rast|416.8.peg.722||COGs COG3558|][proka|PROKKA_00699||SnoaL-like domain protein|]
pgap	AYM39_03465	759633	762326	-	4	girp	2694	0		759633		carbonate dehydratase		[img|Ga0113560_11705||Ca2+-transporting ATPase|3.6.3.8][rast|416.8.peg.724||Cation-transporting ATPase|][proka|PROKKA_00701|ctpF_1|putative cation-transporting ATPase F|3.6.3.-]
pgap	AYM39_03460	759048	759665	+	4	girp	618	0		759665		TetR family transcriptional regulator		[img|Ga0113560_11704||DNA-binding transcriptional regulator, AcrR family|][rast|416.8.peg.723||Transcriptional regulator, TetR family|][proka|PROKKA_00700|mtrR|HTH-type transcriptional regulator MtrR|]
pgap	AYM39_03470	762517	762723	+	4	girp	207	0		762723		hypothetical protein		[img|Ga0113560_11706||hypothetical protein|][rast|416.8.peg.725||hypothetical protein|][proka|PROKKA_00702||hypothetical protein|]
pgap	AYM39_03475	762767	763489	-	4	girp	752.2	19.5		762767		molybdopterin-synthase adenylyltransferase		[img|Ga0113560_11707||adenylyltransferase and sulfurtransferase|][rast|416.8.peg.726||Sulfur carrier protein adenylyltransferase ThiF|][proka|PROKKA_00703|moeB|Molybdopterin-synthase adenylyltransferase|2.7.7.80]
pgap	AYM39_03480	763731	764018	+	4	girp	288	0		764018		co-chaperone GroES		[img|Ga0113560_11708|groS|chaperonin GroES|][rast|416.8.peg.727||Heat shock protein 60 family co-chaperone GroES|][proka|PROKKA_00704|groS_2|10 kDa chaperonin|]
pgap	AYM39_03485	764075	765715	+	4	girp	1641	0		765715	groEL	molecular chaperone GroEL		[img|Ga0113560_11709|groL|chaperonin GroEL|][rast|416.8.peg.728||Heat shock protein 60 family chaperone GroEL|][proka|PROKKA_00705|groL_2|60 kDa chaperonin|]
pgap	AYM39_03490	765875	766648	+	4	girp	768	12		766648		hypothetical protein		[img|Ga0113560_11710||two-component system, NarL family, sensor histidine kinase BarA|2.7.13.3][rast|416.8.peg.729||sensory box histidine kinase/response regulator|][proka|PROKKA_00706|barA_2|Signal transduction histidine-protein kinase BarA|2.7.13.3]
pgap	AYM39_03495	766669	769617	-	4	girp	2945.2	7.5		766669		hypothetical protein		[img|Ga0113560_11711||pilus assembly protein FimV|][rast|416.8.peg.730||Tfp pilus assembly protein FimV|][proka|PROKKA_00707||hypothetical protein|]
pgap	AYM39_03500	769668	770690	-	4	girp	1023	0		769668		aspartate-semialdehyde dehydrogenase		[img|Ga0113560_11712|asd|aspartate-semialdehyde dehydrogenase|1.2.1.11][rast|416.8.peg.731||Aspartate-semialdehyde dehydrogenase (EC 1.2.1.11)|1.2.1.11][proka|PROKKA_00708|asd2|Aspartate-semialdehyde dehydrogenase 2|1.2.1.11]
pgap	AYM39_03505	770697	771776	-	4	girp	1080	0		770697		3-isopropylmalate dehydrogenase		[img|Ga0113560_11713||3-isopropylmalate dehydrogenase|1.1.1.85][rast|416.8.peg.732||3-isopropylmalate dehydrogenase (EC 1.1.1.85)|1.1.1.85][proka|PROKKA_00709|leuB_1|3-isopropylmalate dehydrogenase|1.1.1.85]
pgap	AYM39_03510	771799	772437	-	4	girp	639	0		771799		3-isopropylmalate dehydratase		[img|Ga0113560_11714|leuD|3-isopropylmalate/(R)-2-methylmalate dehydratase small subunit|4.2.1.35; 4.2.1.33][rast|416.8.peg.733||3-isopropylmalate dehydratase small subunit (EC 4.2.1.33)|4.2.1.33][proka|PROKKA_00710|leuD|3-isopropylmalate dehydratase small subunit|4.2.1.33]
pgap	AYM39_03515	772441	773847	-	4	girp	1407	0		772441		isopropylmalate isomerase		[img|Ga0113560_11715|leuC|3-isopropylmalate/(R)-2-methylmalate dehydratase large subunit|4.2.1.35; 4.2.1.33][rast|416.8.peg.734||3-isopropylmalate dehydratase large subunit (EC 4.2.1.33)|4.2.1.33][proka|PROKKA_00711|leuC|3-isopropylmalate dehydratase large subunit|4.2.1.33]
pgap	AYM39_03520	773923	774561	-	4	girp	639	0		773923		adenylate kinase		[img|Ga0113560_11716|adk|adenylate kinase|2.7.4.3][rast|416.8.peg.735||Adenylate kinase (EC 2.7.4.3)|2.7.4.3][proka|PROKKA_00712|adk|Adenylate kinase|2.7.4.3]
pgap	AYM39_03525	774756	775547	-	4	girp	792	0		774756		rRNA methyltransferase		[img|Ga0113560_11717||16S rRNA (adenine1518-N6/adenine1519-N6)-dimethyltransferase|2.1.1.182][rast|416.8.peg.736||SSU rRNA (adenine(1518)-N(6)/adenine(1519)-N(6))- dimethyltransferase (EC 2.1.1.182)|2.1.1.182][proka|PROKKA_00713|rsmA|Ribosomal RNA small subunit methyltransferase A|2.1.1.182]
pgap	AYM39_03530	775588	775911	-	4	girp	450	224.2		775588		hypothetical protein		[img|Ga0113560_11718||protein of unknown function (DUF4276)|][rast|416.8.peg.737||hypothetical protein|][proka|PROKKA_00714||hypothetical protein|]
pgap	AYM39_03535	776220	777413	-	4	girp	1194	0		776220		chromosome segregation protein SMC		[img|Ga0113560_11719||Predicted ATPase|][rast|416.8.peg.738||hypothetical protein|][proka|PROKKA_00715||recombination protein F|]
pgap	AYM39_03540	777452	778429	-	4	girp	978	0		777452	pdxA	4-hydroxythreonine-4-phosphate dehydrogenase		[img|Ga0113560_11720||4-hydroxythreonine-4-phosphate dehydrogenase|1.1.1.262][rast|416.8.peg.739||4-hydroxythreonine-4-phosphate dehydrogenase (EC 1.1.1.262)|1.1.1.262][proka|PROKKA_00716|pdxA|4-hydroxythreonine-4-phosphate dehydrogenase|1.1.1.262]
pgap	AYM39_03545	778497	779060	-	4	girp	537	18		778497		MarR family transcriptional regulator		[img|Ga0113560_11721||DNA-binding transcriptional regulator, MarR family|][rast|416.8.peg.740||Transcriptional regulator, MarR family|][proka|PROKKA_00717||transcriptional repressor MprA|]
pgap	AYM39_03550	779275	780855	+	4	girp	1581	0		780855		cytochrome C		[img|Ga0113560_11722||Cytochrome C oxidase, cbb3-type, subunit III|][rast|416.8.peg.741||Cytochrome cd1 nitrite reductase (EC:1.7.2.1)|][proka|PROKKA_00718|nirS|Nitrite reductase precursor|1.7.2.1]
pgap	AYM39_03555	780852	781160	+	4	girp	309	0		781160		cytochrome C		[img|Ga0113560_11723||Cytochrome c553|][rast|416.8.peg.742||Cytochrome c4|][proka|PROKKA_00719||Cytochrome c-554(548)|]
pgap	AYM39_03560	781164	781463	+	4	girp	300	0		781463		cytochrome C55X precursor NirC		[img|Ga0113560_11724||cytochrome c55X|][rast|416.8.peg.743||Cytochrome c55X precursor NirC|][proka|PROKKA_00720||hypothetical protein|]
pgap	AYM39_03565	781550	782722	+	4	girp	1173	0		782722		protein nirF		[img|Ga0113560_11725||protein NirF|][rast|416.8.peg.745||Heme d1 biosynthesis protein NirF|][proka|PROKKA_00721||Cytochrome D1 heme domain protein|]
pgap	AYM39_03570	782725	783189	+	4	girp	465	0		783189		AsnC family transcriptional regulator		[img|Ga0113560_11726||DNA-binding transcriptional regulator, Lrp family|][rast|416.8.peg.746||Heme d1 biosynthesis protein NirD / Heme d1 biosynthesis protein NirL|][proka|PROKKA_00722||hypothetical protein|]
pgap	AYM39_03575	783182	783649	+	1	g	468	0	pseudo	783649		[PSEUDO_pgap: protein nirL]
img	Ga0113560_11727	783182	783724	+	3	irp	543	0		783724		DNA-binding transcriptional regulator, Lrp family		[rast|416.8.peg.747||Heme d1 biosynthesis protein NirL|][proka|PROKKA_00723||hypothetical protein|]
pgap	AYM39_03580	783730	784173	+	4	girp	444	0		784173		protein nirG		[img|Ga0113560_11728||DNA-binding transcriptional regulator, Lrp family|][rast|416.8.peg.748||Heme d1 biosynthesis protein NirG|][proka|PROKKA_00724||hypothetical protein|]
pgap	AYM39_03585	784173	784652	+	4	girp	480	0		784652		protein nirH		[img|Ga0113560_11729||DNA-binding transcriptional regulator, Lrp family|][rast|416.8.peg.749||Heme d1 biosynthesis protein NirH|][proka|PROKKA_00725||hypothetical protein|]
pgap	AYM39_03590	784655	785794	+	4	girp	1140	0		785794		heme d1 biosynthesis radical SAM protein NirJ		[img|Ga0113560_11730||heme d1 biosynthesis radical SAM protein NirJ|][rast|416.8.peg.750||Heme d1 biosynthesis protein NirJ|][proka|PROKKA_00726|albA_2|Antilisterial bacteriocin subtilosin biosynthesis protein AlbA|]
pgap	AYM39_03595	785829	786314	-	4	girp	486	0		785829		histidine phosphatase family protein		[img|Ga0113560_11731||phosphohistidine phosphatase|3.1.3.-][rast|416.8.peg.751||Phosphohistidine phosphatase SixA (EC 3.1.3.-)|][proka|PROKKA_00727||phosphohistidine phosphatase|]
pgap	AYM39_03605	786803	787918	-	4	girp	1116	0		786803		anhydro-N-acetylmuramic acid kinase		[img|Ga0113560_11733||anhydro-N-acetylmuramic acid kinase|2.7.1.170][rast|416.8.peg.753||Anhydro-N-acetylmuramic acid kinase (EC 2.7.1.-)|][proka|PROKKA_00729|anmK|Anhydro-N-acetylmuramic acid kinase|2.7.1.170]
pgap	AYM39_03600	786479	786811	+	4	girp	333	0		786811		iron-sulfur cluster insertion protein ErpA		[img|Ga0113560_11732|erpA|iron-sulfur cluster insertion protein|][rast|416.8.peg.752||probable iron binding protein from the HesB_IscA_SufA family|][proka|PROKKA_00728|erpA_1|Iron-sulfur cluster insertion protein ErpA|]
pgap	AYM39_03610	787923	789218	-	4	girp	1296	0		787923		peptidase M23		[img|Ga0113560_11734||Murein DD-endopeptidase MepM and murein hydrolase activator NlpD, contain LysM domain|][rast|416.8.peg.754||Peptidase, M23/M37 family|][proka|PROKKA_00730|mepM|Murein DD-endopeptidase MepM|3.4.24.-]
pgap	AYM39_03615	789367	790557	+	4	girp	1193.2	1.5		790557		tyrosine--tRNA ligase		[img|Ga0113560_11735||tyrosyl-tRNA synthetase|6.1.1.1][rast|416.8.peg.755||Tyrosyl-tRNA synthetase (EC 6.1.1.1)|6.1.1.1][proka|PROKKA_00731|tyrS|Tyrosine--tRNA ligase|6.1.1.1]
pgap	AYM39_03645	796684	797172	-	4	girp	453.8	70.5		796684		thioredoxin		[img|Ga0113560_11742||Peroxiredoxin|][rast|416.8.peg.756||Thioredoxin|][proka|PROKKA_00737|resA_1|Thiol-disulfide oxidoreductase ResA|]
pgap	AYM39_03650	797266	798849	+	4	girp	1584	0		798849		3-phosphoglycerate dehydrogenase		[img|Ga0113560_11743||D-3-phosphoglycerate dehydrogenase|1.1.1.95][rast|416.8.peg.757||D-3-phosphoglycerate dehydrogenase (EC 1.1.1.95)|1.1.1.95][proka|PROKKA_00738|serA|D-3-phosphoglycerate dehydrogenase|1.1.1.95]
pgap	AYM39_03655	798846	799487	+	4	girp	642	0		799487		haloacid dehalogenase		[img|Ga0113560_11744||phosphoserine phosphatase|3.1.3.3][rast|416.8.peg.758||Phosphoserine phosphatase (EC 3.1.3.3)|3.1.3.3][proka|PROKKA_00739|serB|Phosphoserine phosphatase|3.1.3.3]
pgap	AYM39_03660	799556	800305	+	4	girp	750	0		800305		hypothetical protein		[img|Ga0113560_11745||DNA-binding regulatory protein, YebC/PmpR family|][rast|416.8.peg.759||FIG000859: hypothetical protein YebC|][proka|PROKKA_00740|pmpR|Transcriptional regulatory protein PmpR|]
pgap	AYM39_03665	800332	800829	+	4	girp	498	0		800829	ruvC	crossover junction endodeoxyribonuclease RuvC		[img|Ga0113560_11746||crossover junction endodeoxyribonuclease RuvC|3.1.22.4][rast|416.8.peg.760||Crossover junction endodeoxyribonuclease RuvC (EC 3.1.22.4)|3.1.22.4][proka|PROKKA_00741|ruvC|Crossover junction endodeoxyribonuclease RuvC|3.1.22.4]
pgap	AYM39_03670	800826	801428	+	4	girp	603	0		801428		Holliday junction ATP-dependent DNA helicase RuvA		[img|Ga0113560_11747||holliday junction DNA helicase RuvA|3.6.4.12][rast|416.8.peg.761||Holliday junction DNA helicase RuvA|][proka|PROKKA_00742|ruvA|Holliday junction ATP-dependent DNA helicase RuvA|3.6.4.12]
pgap	AYM39_03675	801425	802462	+	4	girp	1038	0		802462	ruvB	ATP-dependent DNA helicase RuvB		[img|Ga0113560_11748||holliday junction DNA helicase RuvB|3.6.4.12][rast|416.8.peg.762||Holliday junction DNA helicase RuvB|][proka|PROKKA_00743|ruvB_1|Holliday junction ATP-dependent DNA helicase RuvB|3.6.4.12]
pgap	AYM39_03680	802459	802875	+	4	girp	417	0		802875		4-hydroxybenzoyl-CoA thioesterase		[img|Ga0113560_11749||acyl-CoA thioester hydrolase|3.1.2.-][rast|416.8.peg.763||4-hydroxybenzoyl-CoA thioesterase family active site|][proka|PROKKA_00744|ybgC|Acyl-CoA thioester hydrolase YbgC|3.1.2.-]
pgap	AYM39_03685	802875	803552	+	4	girp	678	0		803552		protein TolQ		[img|Ga0113560_11750||biopolymer transport protein TolQ|][rast|416.8.peg.764||MotA/TolQ/ExbB proton channel family protein|][proka|PROKKA_00745|exbB_2|Biopolymer transport protein ExbB|]
pgap	AYM39_03690	803549	804007	+	4	girp	459	0		804007		protein TolR		[img|Ga0113560_11751||biopolymer transport protein TolR|][rast|416.8.peg.765||Tol biopolymer transport system, TolR protein|][proka|PROKKA_00746|exbD_2|Biopolymer transport protein ExbD|]
pgap	AYM39_03695	804018	805547	+	4	girp	1530	0		805547		protein TolA		[img|Ga0113560_11752||colicin import membrane protein|][rast|416.8.peg.766||TolA protein|][proka|PROKKA_00747||cell envelope integrity inner membrane protein TolA|]
pgap	AYM39_03700	805565	806848	+	4	girp	1284	0		806848		translocation protein TolB		[img|Ga0113560_11753||TolB protein|][rast|416.8.peg.767||tolB protein precursor, periplasmic protein involved in the tonb-independent uptake of group A colicins|][proka|PROKKA_00748||hypothetical protein|]
pgap	AYM39_03705	806912	807475	+	4	girp	564	0		807475		peptidoglycan-associated lipoprotein		[img|Ga0113560_11754||peptidoglycan-associated lipoprotein|][rast|416.8.peg.768||18K peptidoglycan-associated outer membrane lipoprotein; Peptidoglycan-associated lipoprotein precursor; Outer membrane protein P6; OmpA/MotB precursor|][proka|PROKKA_00749|pal|Peptidoglycan-associated lipoprotein precursor|]
pgap	AYM39_03710	807475	808311	+	4	girp	831	12		808311		tol-pal system protein		[img|Ga0113560_11755||tol-pal system protein YbgF|][rast|416.8.peg.769||TPR repeat containing exported protein; Putative periplasmic protein contains a protein prenylyltransferase domain|][proka|PROKKA_00750||tol-pal system protein YbgF|]
pgap	AYM39_03715	808323	808967	+	4	girp	645	0		808967		7-carboxy-7-deazaguanine synthase		[img|Ga0113560_11756||7-carboxy-7-deazaguanine synthase|4.3.99.3][rast|416.8.peg.770||Queuosine Biosynthesis QueE Radical SAM|][proka|PROKKA_00751|queE|7-carboxy-7-deazaguanine synthase|4.3.99.3]
pgap	AYM39_03720	808951	809649	+	4	girp	699.8	1.5		809649		7-cyano-7-deazaguanine synthase		[img|Ga0113560_11757||7-cyano-7-deazaguanine synthase|6.3.4.20][rast|416.8.peg.771||Queuosine Biosynthesis QueC ATPase|][proka|PROKKA_00752|queC|7-cyano-7-deazaguanine synthase|6.3.4.20]
pgap	AYM39_03725	809751	810365	+	4	girp	615	0		810365		chemotaxis protein		[img|Ga0113560_11758||hypothetical protein|][rast|416.8.peg.772||Methyl-accepting chemotaxis protein|][proka|PROKKA_00753||hypothetical protein|]
pgap	AYM39_03730	810394	811122	+	4	girp	729	0		811122		flavoprotein		[img|Ga0113560_11759||Metallo-beta-lactamase superfamily protein|][rast|416.8.peg.773||CDP-abequose synthase (Fragment)|][proka|PROKKA_00754||Metallo-beta-lactamase superfamily protein|]
pgap	AYM39_03735	811228	812583	+	4	girp	1336.5	22.5		812583		tRNA-2-methylthio-N(6)-dimethylallyladenosine synthase MiaB		[img|Ga0113560_11760|miaB|tRNA-2-methylthio-N6-dimethylallyladenosine synthase|2.8.4.3][rast|416.8.peg.774||tRNA-i(6)A37 methylthiotransferase|][proka|PROKKA_00755|miaB|(Dimethylallyl)adenosine tRNA methylthiotransferase MiaB|2.-.-.-]
pgap	AYM39_03740	812583	813569	+	4	girp	987	0		813569		phosphate starvation-inducible protein PhoH		[img|Ga0113560_11761||phosphate starvation-inducible protein PhoH|][rast|416.8.peg.775||Phosphate starvation-inducible protein PhoH, predicted ATPase|][proka|PROKKA_00756|ybeZ_1|PhoH-like protein|]
pgap	AYM39_03745	813566	814024	+	4	girp	459	0		814024		rRNA maturation factor		[img|Ga0113560_11762||probable rRNA maturation factor|][rast|416.8.peg.776||Metal-dependent hydrolase YbeY, involved in rRNA and/or ribosome maturation and assembly|][proka|PROKKA_00757|ybeY|Endoribonuclease YbeY|3.1.-.-]
pgap	AYM39_03750	814021	814860	+	4	girp	840	0		814860		magnesium/cobalt efflux protein		[img|Ga0113560_11763||magnesium and cobalt transporter|][rast|416.8.peg.777||Magnesium and cobalt efflux protein CorC|][proka|PROKKA_00758|corC|Magnesium and cobalt efflux protein CorC|]
pgap	AYM39_03755	814865	818608	-	4	girp	3744	0		814865		hypothetical protein		[img|Ga0113560_11764||PAS domain S-box-containing protein/diguanylate cyclase (GGDEF) domain-containing protein|][rast|416.8.peg.778||diguanylate cyclase/phosphodiesterase (GGDEF & EAL domains) with PAS/PAC sensor(s)|][proka|PROKKA_00759|gmr_7|Cyclic di-GMP phosphodiesterase Gmr|3.1.4.52]
pgap	AYM39_03760	818608	819645	-	4	girp	1038	0		818608		spermidine/putrescine ABC transporter substrate-binding protein		[img|Ga0113560_11765||putative spermidine/putrescine transport system substrate-binding protein|][rast|416.8.peg.779||ABC transporter, periplasmic spermidine putrescine-binding protein PotD (TC 3.A.1.11.1)|][proka|PROKKA_00760|potF|Putrescine-binding periplasmic protein precursor|]
pgap	AYM39_03765	819766	820554	-	4	girp	789	0		819766		type II and III secretion system protein		[img|Ga0113560_11766||type II/III secretion system short domain-containing protein|][rast|416.8.peg.780||Type II and III secretion system family protein|][proka|PROKKA_00761||Bacterial type II/III secretion system short domain protein|]
pgap	AYM39_03770	820544	821977	-	4	girp	1434	0		820544		glycogen synthase		[img|Ga0113560_11767||starch synthase|2.4.1.21][rast|416.8.peg.781||Glycogen synthase, ADP-glucose transglucosylase (EC 2.4.1.21)|2.4.1.21][proka|PROKKA_00762|glgA_1|Glycogen synthase|2.4.1.21]
pgap	AYM39_03775	821986	824166	-	4	girp	2181	0		821986		glycogen-branching enzyme		[img|Ga0113560_11768||1,4-alpha-glucan branching enzyme|2.4.1.18][rast|416.8.peg.782||1,4-alpha-glucan (glycogen) branching enzyme, GH-13-type (EC 2.4.1.18)|2.4.1.18][proka|PROKKA_00763|glgB|1,4-alpha-glucan branching enzyme GlgB|2.4.1.18]
pgap	AYM39_03780	824385	825665	+	4	girp	1281	0		825665	glgC	glucose-1-phosphate adenylyltransferase		[img|Ga0113560_11769|glgC|glucose-1-phosphate adenylyltransferase|2.7.7.27][rast|416.8.peg.783||Glucose-1-phosphate adenylyltransferase (EC 2.7.7.27)|2.7.7.27][proka|PROKKA_00764|glgC|Glucose-1-phosphate adenylyltransferase|2.7.7.27]
pgap	AYM39_03785	825655	827346	+	4	girp	1692	0		827346		glycoside hydrolase		[img|Ga0113560_11770||Alpha-amylase/alpha-mannosidase, GH57 family|][rast|416.8.peg.784||Amylopullulanase (EC 3.2.1.1) / (EC 3.2.1.41)|3.2.1.1; 3.2.1.41][proka|PROKKA_00765||Glycosyl hydrolase family 57|]
pgap	AYM39_03790	827364	828836	+	4	girp	1452.8	40.5		828836		4-alpha-glucanotransferase		[img|Ga0113560_11771||4-alpha-glucanotransferase|2.4.1.25][rast|416.8.peg.785||4-alpha-glucanotransferase (amylomaltase) (EC 2.4.1.25)|2.4.1.25][proka|PROKKA_00766|malQ|4-alpha-glucanotransferase|2.4.1.25]
pgap	AYM39_03795	828855	829715	-	4	girp	846.8	28.5		828855		ABC transporter substrate-binding protein		[img|Ga0113560_11772||quinoprotein dehydrogenase-associated probable ABC transporter substrate-binding protein|][rast|416.8.peg.786||Bll6196 protein|][proka|PROKKA_00767||Bacterial extracellular solute-binding proteins, family 3|]
pgap	AYM39_03800	829807	831660	-	4	girp	1854	0		829807		methanol dehydrogenase		[img|Ga0113560_11773||PQQ-dependent dehydrogenase, methanol/ethanol family|][rast|416.8.peg.787||Methanol dehydrogenase large subunit protein (EC 1.1.99.8)|1.1.99.8][proka|PROKKA_00768||Methanol dehydrogenase [cytochrome c] subunit 1|1.1.2.7]
pgap	AYM39_03805	831917	832552	-	4	girp	636	0		831917		peptide-methionine (S)-S-oxide reductase		[img|Ga0113560_11774||peptide-methionine (S)-S-oxide reductase|1.8.4.11][rast|416.8.peg.788||Peptide methionine sulfoxide reductase MsrA (EC 1.8.4.11)|1.8.4.11][proka|PROKKA_00769|msrA|Peptide methionine sulfoxide reductase MsrA|1.8.4.11]
pgap	AYM39_03810	832629	833510	+	4	girp	882	0		833510		molecular chaperone Hsp33		[img|Ga0113560_11775||molecular chaperone Hsp33|][rast|416.8.peg.789||33 kDa chaperonin (Heat shock protein 33) (HSP33)|][proka|PROKKA_00770|hslO|33 kDa chaperonin|]
pgap	AYM39_03815	833518	834291	+	4	girp	774	0		834291		hypothetical protein		[img|Ga0113560_11776||hypothetical protein|][rast|416.8.peg.790||hypothetical protein|][proka|PROKKA_00771||hypothetical protein|]
pgap	AYM39_03820	834340	835512	-	4	girp	1173	0		834340		phosphoglycerate kinase		[img|Ga0113560_11777|pgk|phosphoglycerate kinase|2.7.2.3][rast|416.8.peg.791||Phosphoglycerate kinase (EC 2.7.2.3)|2.7.2.3][proka|PROKKA_00772|pgk|Phosphoglycerate kinase|2.7.2.3]
pgap	AYM39_03825	835645	837480	+	4	girp	1833.8	4.5		837480		hypothetical protein		[img|Ga0113560_11778||TIGR03503 family protein|][rast|416.8.peg.792||FIG004599: Hypothetical protein|][proka|PROKKA_00773||von Willebrand factor type A domain protein|]
pgap	AYM39_03830	837477	838118	+	4	girp	642	0		838118		hypothetical protein		[img|Ga0113560_11779||hypothetical protein|][rast|416.8.peg.793||hypothetical protein|][proka|PROKKA_00774||hypothetical protein|]
pgap	AYM39_03835	838115	838603	+	4	girp	489	0		838603		hypothetical protein		[img|Ga0113560_11780||hypothetical protein|][rast|416.8.peg.794||hypothetical protein|][proka|PROKKA_00775||hypothetical protein|]
pgap	AYM39_03840	838607	840784	-	4	girp	2178	0		838607		glycogen debranching enzyme		[img|Ga0113560_11781||glycogen operon protein|3.2.1.-][rast|416.8.peg.795||Glycogen debranching enzyme (EC 3.2.1.-)|][proka|PROKKA_00776|glgX|Glycogen debranching enzyme|3.2.1.-]
pgap	AYM39_03845	841020	841673	+	4	girp	681	31.2		841673		hypothetical protein		[img|Ga0113560_11782||protein of unknown function (DUF4912)|][rast|416.8.peg.797||hypothetical protein|][proka|PROKKA_00777||hypothetical protein|]
pgap	AYM39_03850	841666	843252	+	4	girp	1587	0		843252		glycoside hydrolase		[img|Ga0113560_11783||1,4-alpha-glucan branching enzyme|2.4.1.18][rast|416.8.peg.798||Glycogen branching enzyme, GH-57-type, archaeal (EC 2.4.1.18)|2.4.1.18][proka|PROKKA_00778||1,4-alpha-glucan branching enzyme|2.4.1.18]
pgap	AYM39_03855	843318	844817	+	4	girp	1500	0		844817		endonuclease		[img|Ga0113560_11784||maltose 6'-phosphate phosphatase|3.1.3.90][rast|416.8.peg.799||Exodeoxyribonuclease III (EC 3.1.11.2)|3.1.11.2][proka|PROKKA_00779|mapP_1|Maltose 6'-phosphate phosphatase|3.1.3.90]
pgap	AYM39_03860	844870	846462	+	4	girp	1593	0		846462		phospholipase		[img|Ga0113560_11785||PLD-like domain-containing protein|][rast|416.8.peg.800||hypothetical protein|][proka|PROKKA_00780||cardiolipin synthetase|]
pgap	AYM39_03865	846503	847459	+	4	girp	957	0		847459		hypothetical protein		[img|Ga0113560_11786||Formylglycine-generating enzyme, required for sulfatase activity, contains SUMF1/FGE domain|][rast|416.8.peg.801||protein of unknown function DUF323|][proka|PROKKA_00781|pkn1|Serine/threonine-protein kinase pkn1|2.7.11.1]
pgap	AYM39_03870	847732	849099	+	4	girp	1368	0		849099		DNA repair protein RadA		[img|Ga0113560_11787||DNA repair protein RadA/Sms|][rast|416.8.peg.802||DNA repair protein RadA|][proka|PROKKA_00782||hypothetical protein|]
pgap	AYM39_03875	849169	850713	-	4	girp	1545	0		849169		SAM-dependent methyltransferase		[img|Ga0113560_11788||hypothetical protein|][rast|416.8.peg.803||Spermidine synthase (EC 2.5.1.16)|2.5.1.16][proka|PROKKA_00783||spermidine synthase|]
pgap	AYM39_03880	851122	853701	-	4	girp	2609.2	58.5		851122		hypothetical protein		[img|Ga0113560_11789||Protein of unknown function (DUF3570)|][rast|416.8.peg.804||FIG00856958: hypothetical protein|][proka|PROKKA_00784||hypothetical protein|]
pgap	AYM39_03885	853766	853972	-	4	girp	267	59.3		853766		arginine decarboxylase		[img|Ga0113560_11790||protein of unknown function (DUF4266)|][rast|416.8.peg.805||arginine decarboxylase|][proka|PROKKA_00785||hypothetical protein|]
pgap	AYM39_03890	854387	854863	-	4	girp	496.5	22.5		854387		hypothetical protein		[img|Ga0113560_11791||hypothetical protein|][rast|416.8.peg.806||hypothetical protein|][proka|PROKKA_00786||hypothetical protein|]
pgap	AYM39_03895	854930	855694	-	4	girp	765	0		854930		hypothetical protein		[img|Ga0113560_11792||HEAT repeat-containing protein|][rast|416.8.peg.807||hypothetical protein|][proka|PROKKA_00787||HEAT repeat protein|]
pgap	AYM39_03900	855732	856463	-	4	girp	718.5	9		855732		hypothetical protein		[img|Ga0113560_11793||VPLPA-CTERM protein sorting domain-containing protein|][rast|416.8.peg.808||hypothetical protein|][proka|PROKKA_00788||hypothetical protein|]
pgap	AYM39_03905	856550	857119	-	4	girp	570	0		856550		hypothetical protein		[img|Ga0113560_11794||VPLPA-CTERM protein sorting domain-containing protein|][rast|416.8.peg.809||hypothetical protein|][proka|PROKKA_00789||hypothetical protein|]
pgap	AYM39_03910	857224	858087	-	4	girp	864	0		857224		hypothetical protein		[img|Ga0113560_11795||hypothetical protein|][rast|416.8.peg.810||hypothetical protein|][proka|PROKKA_00790||hypothetical protein|]
pgap	AYM39_03915	858695	859189	-	4	girp	495	0		858695		redoxin		[img|Ga0113560_11796||Thiol-disulfide isomerase or thioredoxin|][rast|416.8.peg.811||Thioredoxin family protein|][proka|PROKKA_00791|resA_2|Thiol-disulfide oxidoreductase ResA|]
pgap	AYM39_03920	859728	860003	+	4	girp	255.8	40.5		860003		hypothetical protein		[img|Ga0113560_11797||hypothetical protein|][rast|416.8.peg.812||hypothetical protein|][proka|PROKKA_00792||hypothetical protein|]
pgap	AYM39_03925	860132	861505	+	4	girp	1374	0		861505		histidine kinase		[img|Ga0113560_11798||two-component system, sensor histidine kinase RegB|2.7.13.3][rast|416.8.peg.813||Sensor histidine kinase PrrB (RegB) (EC 2.7.3.-)|][proka|PROKKA_00793|regB|Sensor histidine kinase RegB|2.7.13.3]
pgap	AYM39_03930	861483	862031	+	4	girp	549	0		862031		two-component system response regulator		[img|Ga0113560_11799||two-component system, response regulator RegA|][rast|416.8.peg.814||Dna binding response regulator PrrA (RegA)|][proka|PROKKA_00794|regA|Photosynthetic apparatus regulatory protein RegA|]
pgap	AYM39_03935	862659	862910	+	4	girp	252	0		862910		hypothetical protein		[img|Ga0113560_11800||Predicted antitoxin, contains HTH domain|][rast|416.8.peg.815||hypothetical protein|][proka|PROKKA_00795||hypothetical protein|]
pgap	AYM39_03940	862907	863384	+	1	g	478	0	pseudo	863384		[PSEUDO_pgap: hypothetical protein]
pgap	AYM39_03945	863789	864091	-	1	g	303	0		863789		hypothetical protein
img	Ga0113560_11801	864078	864359	-	2	ip	282	0		864078		antitoxin ParD1/3/4		[proka|PROKKA_00796||hypothetical protein|]
pgap	AYM39_03950	864655	865881	-	4	girp	1227	0		864655		transposase		[img|Ga0113560_11802||putative transposase|][rast|416.8.peg.817||Mobile element protein|][proka|PROKKA_00797||Transposase, Mutator family|]
pgap	AYM39_03955	865914	866354	-	4	girp	441	0		865914		hypothetical protein		[img|Ga0113560_11803||hypothetical protein|][rast|416.8.peg.818||hypothetical protein|][proka|PROKKA_00798||hypothetical protein|]
pgap	AYM39_03960	866389	866970	-	4	girp	540	84		866389		hypothetical protein		[img|Ga0113560_11804||DNA-binding transcriptional regulator, XRE-family HTH domain|][rast|416.8.peg.819||hypothetical protein|][proka|PROKKA_00799||helix-turn-helix protein|]
pgap	AYM39_03965	867035	867358	-	4	girp	324	0		867035		hypothetical protein		[img|Ga0113560_11805||hypothetical protein|][rast|416.8.peg.820||hypothetical protein|][proka|PROKKA_00800||hypothetical protein|]
pgap	AYM39_03970	867409	868422	-	4	girp	1014	0		867409		hypothetical protein		[img|Ga0113560_11806||hypothetical protein|][rast|416.8.peg.821||tail stability; region of aa 277-403 similar to region aa 1061-1186 of non-muscle myosin II heavy chain (MYSN_ACACA; 1509 aa) and to region of aa 113-230 of Pseudomonas aeruginosa TolA (TOLA_PSEAE; 347 aa) and homologous TolA proteins|][proka|PROKKA_00801||hypothetical protein|]
pgap	AYM39_03975	868422	869183	-	4	girp	762	0		868422		hypothetical protein		[img|Ga0113560_11807||hypothetical protein|][rast|416.8.peg.822||hypothetical protein|][proka|PROKKA_00802||hypothetical protein|]
pgap	AYM39_03980	869184	871049	-	4	girp	1866	0		869184		hypothetical protein		[img|Ga0113560_11808||hypothetical protein|][rast|416.8.peg.823||LysM domain protein|][proka|PROKKA_00803||hypothetical protein|]
pgap	AYM39_03985	871049	871597	-	4	girp	547.5	3		871049		hypothetical protein		[img|Ga0113560_11809||hypothetical protein|][rast|416.8.peg.824||hypothetical protein|][proka|PROKKA_00804||hypothetical protein|]
pgap	AYM39_03990	871607	872158	-	4	girp	537	46.3		871607		hypothetical protein		[img|Ga0113560_11810||hypothetical protein|][rast|416.8.peg.825||hypothetical protein|][proka|PROKKA_00805||hypothetical protein|]
pgap	AYM39_03995	872260	872523	-	4	girp	294	34.6		872260		hypothetical protein		[img|Ga0113560_11811||hypothetical protein|][rast|416.8.peg.826||hypothetical protein|][proka|PROKKA_00806||hypothetical protein|]
pgap	AYM39_04000	872626	873903	-	4	girp	1278	0		872626		hypothetical protein		[img|Ga0113560_11812||replicative DNA helicase|3.6.4.12][rast|416.8.peg.827||Replicative DNA helicase (EC 3.6.1.-)|][proka|PROKKA_00807|dnaC|Replicative DNA helicase|3.6.4.12]
pgap	AYM39_04005	873900	874253	-	4	girp	354	0		873900		hypothetical protein		[img|Ga0113560_11813||hypothetical protein|][rast|416.8.peg.828||hypothetical protein|][proka|PROKKA_00808||hypothetical protein|]
pgap	AYM39_04010	874653	874994	-	1	g	342	0		874653		hypothetical protein
img	Ga0113560_11814	874470	874661	+	3	irp	192	0		874661		hypothetical protein		[rast|416.8.peg.829||Endoglucanase (EC 3.2.1.4)|3.2.1.4][proka|PROKKA_00809||hypothetical protein|]
pgap	AYM39_04015	874987	875445	-	4	girp	459	0		874987		hypothetical protein		[img|Ga0113560_11815||hypothetical protein|][rast|416.8.peg.830||hypothetical protein|][proka|PROKKA_00810||hypothetical protein|]
img	Ga0113560_11816	875902	876153	-	2	ip	252	0		875902		hypothetical protein		[proka|PROKKA_00811||hypothetical protein|]
pgap	AYM39_04020	876287	876511	-	1	g	225	0		876287		hypothetical protein
pgap	AYM39_04025	876548	877078	-	3	gip	513	15.6		876548		hypothetical protein		[img|Ga0113560_11817||hypothetical protein|][proka|PROKKA_00812||hypothetical protein|]
pgap	AYM39_04030	877163	877459	-	4	girp	295.5	3		877163		LacI family transcriptional regulator		[img|Ga0113560_11818||addiction module antidote protein, HigA family|][rast|416.8.peg.831||HigA protein (antitoxin to HigB)|][proka|PROKKA_00813|ybaQ|putative HTH-type transcriptional regulator YbaQ|]
pgap	AYM39_04035	877482	878489	-	4	girp	1008	0		877482		ArsR family transcriptional regulator		[img|Ga0113560_11819||protein of unknown function (DUF4325)|][rast|416.8.peg.832||ATP-binding region, ATPase-like|][proka|PROKKA_00814||hypothetical protein|]
pgap	AYM39_04040	878632	879834	-	4	girp	1203	0		878632		hypothetical protein		[img|Ga0113560_11820||Site-specific recombinase XerD|][rast|416.8.peg.833||Integrase|][proka|PROKKA_00815|xerC_1|Tyrosine recombinase XerC|]
pgap	AYM39_04045	880020	880811	-	3	gip	792	0		880020		hypothetical protein		[img|Ga0113560_11821||hypothetical protein|][proka|PROKKA_00816||hypothetical protein|]
img	Ga0113560_11822	881219	881455	+	2	ip	237	0		881455		Plasmid stability protein		[proka|PROKKA_00817||hypothetical protein|]
pgap	AYM39_04050	881442	881861	+	4	girp	420	0		881861		recombinase		[img|Ga0113560_11823||hypothetical protein|][rast|416.8.peg.834||VapC toxin protein|][proka|PROKKA_00818|fitB_1|Toxin FitB|3.1.-.-]
pgap	AYM39_04055	881955	882755	-	4	girp	960.8	106.5		881955		hypothetical protein		[img|Ga0113560_11824||hypothetical protein (DUF2220)|][rast|416.8.peg.835||hypothetical protein|][proka|PROKKA_00819||hypothetical protein|]
pgap	AYM39_04060	882965	883456	-	1	g	492	0		882965		hypothetical protein
pgap	AYM39_04065	883635	884861	+	4	girp	1227	0		884861		transposase		[img|Ga0113560_11825||putative transposase|][rast|416.8.peg.836||Mobile element protein|][proka|PROKKA_00820||Transposase, Mutator family|]
pgap	AYM39_04070	885011	886258	-	4	girp	1257.8	19.5		885011		transposase		[img|Ga0113560_11826||Transposase (or an inactivated derivative)|][rast|416.8.peg.837||Mobile element protein|][proka|PROKKA_00821||Transposase, Mutator family|]
pgap	AYM39_04075	887337	887522	+	1	g	186	0		887522		hypothetical protein
pgap	AYM39_04080	887649	887930	-	3	gip	282	0		887649		hypothetical protein		[img|Ga0113560_11827||DNA binding domain-containing protein, excisionase family|][proka|PROKKA_00822||Helix-turn-helix domain protein|]
pgap	AYM39_04085	887981	888361	-	4	girp	381	0		887981		hypothetical protein		[img|Ga0113560_11828||hypothetical protein|][rast|416.8.peg.839||hypothetical protein|][proka|PROKKA_00823||hypothetical protein|]
pgap	AYM39_04090	888358	888711	-	4	girp	357	3.5		888358		hypothetical protein		[img|Ga0113560_11829||hypothetical protein|][rast|416.8.peg.840||hypothetical protein|][proka|PROKKA_00824||hypothetical protein|]
pgap	AYM39_04095	888714	889298	-	4	girp	459	84		888714		hypothetical protein		[img|Ga0113560_11830||hypothetical protein|][rast|416.8.peg.841||hypothetical protein|][proka|PROKKA_00825||hypothetical protein|]
pgap	AYM39_04100	889508	889966	+	3	gip	459	0		889966		hypothetical protein		[img|Ga0113560_11831||hypothetical protein|][proka|PROKKA_00826||hypothetical protein|]
pgap	AYM39_04105	890034	890372	+	4	girp	339	0		890372		hypothetical protein		[img|Ga0113560_11832||hypothetical protein|][rast|416.8.peg.842||hypothetical protein|][proka|PROKKA_00827||hypothetical protein|]
pgap	AYM39_04110	890471	890743	-	4	girp	255	36		890471		hypothetical protein		[img|Ga0113560_11833||hypothetical protein|][rast|416.8.peg.843||hypothetical protein|][proka|PROKKA_00828||hypothetical protein|]
pgap	AYM39_04115	890715	891152	-	4	girp	427.5	21		890715		hypothetical protein		[img|Ga0113560_11834||DNA-binding transcriptional regulator YiaG, contains XRE-type HTH domain|][rast|416.8.peg.844||helix-turn-helix domain protein|][proka|PROKKA_00829||hypothetical protein|]
pgap	AYM39_04120	891170	891568	-	4	girp	318	68.7		891170		hypothetical protein		[img|Ga0113560_11835||protein of unknown function (DUF4258)|][rast|416.8.peg.845||hypothetical protein|][proka|PROKKA_00830||hypothetical protein|]
pgap	AYM39_04125	891771	892115	+	3	gip	345	0		892115		hypothetical protein		[img|Ga0113560_11836||HNH endonuclease|][proka|PROKKA_00831||hypothetical protein|]
pgap	AYM39_04130	892130	892501	-	4	girp	610.5	275.4		892130		hypothetical protein		[img|Ga0113560_11837||aspartyl protease family protein|][rast|416.8.peg.846||hypothetical protein|][proka|PROKKA_00832||Retroviral aspartyl protease|]
pgap	AYM39_04135	893062	893325	+	4	girp	264	0		893325		hypothetical protein		[img|Ga0113560_11838||hypothetical protein|][rast|416.8.peg.847||hypothetical protein|][proka|PROKKA_00833||hypothetical protein|]
img	Ga0113560_11839	893328	894233	-	3	irp	906	0		893328		hypothetical protein		[rast|416.8.peg.848||hypothetical protein|][proka|PROKKA_00834||hypothetical protein|]
pgap	AYM39_04140	893412	893834	-	1	g	423	0	pseudo	893412		[PSEUDO_pgap: hypothetical protein]
pgap	AYM39_04145	894259	895011	-	4	girp	753	0		894259		hypothetical protein		[img|Ga0113560_11840||hypothetical protein|][rast|416.8.peg.849||hypothetical protein|][proka|PROKKA_00835||hypothetical protein|]
pgap	AYM39_04150	895012	895626	-	4	girp	615	0		895012		hypothetical protein		[img|Ga0113560_11841||hypothetical protein|][rast|416.8.peg.850||Phage protein|][proka|PROKKA_00836||hypothetical protein|]
pgap	AYM39_04155	895623	896105	-	3	gip	483	0		895623		hypothetical protein		[img|Ga0113560_11842||hypothetical protein|][proka|PROKKA_00837||hypothetical protein|]
pgap	AYM39_04160	896128	896703	-	4	girp	576	0		896128		hypothetical protein		[img|Ga0113560_11843||hypothetical protein|][rast|416.8.peg.851||hypothetical protein|][proka|PROKKA_00838||hypothetical protein|]
pgap	AYM39_04165	896738	897319	-	4	girp	540	84		896738		hypothetical protein		[img|Ga0113560_11844||DNA-binding transcriptional regulator, XRE-family HTH domain|][rast|416.8.peg.852||hypothetical protein|][proka|PROKKA_00839||helix-turn-helix protein|]
pgap	AYM39_04170	897384	897707	-	4	girp	324	0		897384		hypothetical protein		[img|Ga0113560_11845||hypothetical protein|][rast|416.8.peg.853||hypothetical protein|][proka|PROKKA_00840||hypothetical protein|]
pgap	AYM39_04175	897758	898771	-	4	girp	1014	0		897758		hypothetical protein		[img|Ga0113560_11846||hypothetical protein|][rast|416.8.peg.854||tail stability; region of aa 277-403 similar to region aa 1061-1186 of non-muscle myosin II heavy chain (MYSN_ACACA; 1509 aa) and to region of aa 113-230 of Pseudomonas aeruginosa TolA (TOLA_PSEAE; 347 aa) and homologous TolA proteins|][proka|PROKKA_00841||hypothetical protein|]
pgap	AYM39_04180	898771	899532	-	4	girp	762	0		898771		hypothetical protein		[img|Ga0113560_11847||hypothetical protein|][rast|416.8.peg.855||hypothetical protein|][proka|PROKKA_00842||hypothetical protein|]
pgap	AYM39_04185	899533	900198	-	4	girp	666	0		899533		hypothetical protein		[img|Ga0113560_11848||hypothetical protein|][rast|416.8.peg.856||LysM domain protein|][proka|PROKKA_00843||hypothetical protein|]
pgap	AYM39_04190	900286	901265	-	4	girp	821	106	pseudo	900286		[PSEUDO_pgap: transposase]		[img|Ga0113560_11849||transposase, IS5 family|][rast|416.8.peg.857||Mobile element protein|][proka|PROKKA_00844||Transposase DDE domain protein|]
pgap	AYM39_04195	901326	902855	-	4	girp	1425	210		901326		hypothetical protein		[img|Ga0113560_11850||hypothetical protein|][rast|416.8.peg.858||Phage DNA transfer protein|][proka|PROKKA_00845||hypothetical protein|]
pgap	AYM39_04200	902855	903403	-	4	girp	547.5	3		902855		hypothetical protein		[img|Ga0113560_11851||hypothetical protein|][rast|416.8.peg.860||hypothetical protein|][proka|PROKKA_00846||hypothetical protein|]
pgap	AYM39_04205	903815	904912	+	4	girp	1098	0		904912		transposase		[img|Ga0113560_11852||Transposase|][rast|416.8.peg.862||Mobile element protein|][proka|PROKKA_00847||Transposase DDE domain protein|]
pgap	AYM39_04210	904987	905724	+	3	gip	728	8.7		905724		hypothetical protein		[img|Ga0113560_11853||hypothetical protein|][proka|PROKKA_00848||hypothetical protein|]
img	Ga0113560_11854	905830	906048	+	3	irp	219	0		906048		hypothetical protein		[rast|416.8.peg.863||hypothetical protein|][proka|PROKKA_00849||hypothetical protein|]
pgap	AYM39_04215	906374	906832	+	4	girp	438	24.2		906832		hypothetical protein		[img|Ga0113560_11855||hypothetical protein|][rast|416.8.peg.864||hypothetical protein|][proka|PROKKA_00850||hypothetical protein|]
pgap	AYM39_04225	907158	907373	-	4	girp	216	0		907158		hypothetical protein		[img|Ga0113560_11856||hypothetical protein|][rast|416.8.peg.865||Endoglucanase (EC 3.2.1.4)|3.2.1.4][proka|PROKKA_00851||hypothetical protein|]
pgap	AYM39_04220	906825	907166	+	1	g	342	0		907166		hypothetical protein
pgap	AYM39_04230	907590	907943	+	4	girp	354	0		907943		hypothetical protein		[img|Ga0113560_11857||hypothetical protein|][rast|416.8.peg.866||hypothetical protein|][proka|PROKKA_00852||hypothetical protein|]
pgap	AYM39_04235	907940	908692	+	4	girp	753	0		908692		hypothetical protein		[img|Ga0113560_11858||Transposase DDE domain-containing protein|][rast|416.8.peg.867||Mobile element protein|][proka|PROKKA_00853||hypothetical protein|]
pgap	AYM39_04240	909279	910286	-	4	girp	1008	0		909279		ArsR family transcriptional regulator		[img|Ga0113560_11859||Histidine kinase-like ATPase domain-containing protein|][rast|416.8.peg.868||ATP-binding region, ATPase-like|][proka|PROKKA_00854||hypothetical protein|]
pgap	AYM39_04245	910429	910833	-	4	girp	397.5	8.7		910429		hypothetical protein		[img|Ga0113560_11860||Phage integrase family protein|][rast|416.8.peg.869||Type I restriction-modification system, specificity subunit S (EC 3.1.21.3)|3.1.21.3][proka|PROKKA_00855||site-specific tyrosine recombinase XerC|]
pgap	AYM39_04250	910908	912005	-	4	girp	1098	0		910908		transposase		[img|Ga0113560_11861||Transposase|][rast|416.8.peg.870||Mobile element protein|][proka|PROKKA_00856||Transposase DDE domain protein|]
pgap	AYM39_04255	912088	913041	-	4	girp	941.2	25.5		912088		hypothetical protein		[img|Ga0113560_11862||Phage integrase family protein|][rast|416.8.peg.871||Integrase|][proka|PROKKA_00857||site-specific tyrosine recombinase XerD|]
pgap	AYM39_04260	913044	913835	-	3	gip	792	0		913044		hypothetical protein		[img|Ga0113560_11863||hypothetical protein|][proka|PROKKA_00858||hypothetical protein|]
pgap	AYM39_04265	914147	915126	+	4	girp	821	106	pseudo	915126		[PSEUDO_pgap: transposase]		[img|Ga0113560_11864||transposase, IS5 family|][rast|416.8.peg.872||Mobile element protein|][proka|PROKKA_00859||Transposase DDE domain protein|]
pgap	AYM39_04270	915496	915687	-	4	girp	192	0		915496		hypothetical protein		[img|Ga0113560_11865||hypothetical protein|][rast|416.8.peg.873||hypothetical protein|][proka|PROKKA_00860||hypothetical protein|]
img	Ga0113560_11866	915777	916037	-	2	ip	261	0		915777		hypothetical protein		[proka|PROKKA_00861||hypothetical protein|]
pgap	AYM39_04275	916059	916367	-	1	g	309	0		916059		hypothetical protein
pgap	AYM39_04280	916484	916693	+	4	girp	210	0		916693		hypothetical protein		[img|Ga0113560_11867||hypothetical protein|][rast|416.8.peg.874||hypothetical protein|][proka|PROKKA_00862||hypothetical protein|]
img	Ga0113560_11868	916705	917256	+	2	ip	552	0		917256		hypothetical protein		[proka|PROKKA_00863||hypothetical protein|]
img	Ga0113560_11869	917331	917507	+	2	ip	177	0		917507		hypothetical protein		[proka|PROKKA_00864||hypothetical protein|]
img	Ga0113560_11870	917504	917773	+	3	irp	241	50.2		917773		hypothetical protein		[rast|416.8.peg.875||hypothetical protein|][proka|PROKKA_00865||hypothetical protein|]
pgap	AYM39_04285	918268	918582	+	4	girp	330	17.3		918582		hypothetical protein		[img|Ga0113560_11871||hypothetical protein|][rast|416.8.peg.876||hypothetical protein|][proka|PROKKA_00866||hypothetical protein|]
img	Ga0113560_11872	918585	918728	+	3	irp	144	0		918728		hypothetical protein		[rast|416.8.peg.877||hypothetical protein|][proka|PROKKA_00867||hypothetical protein|]
pgap	AYM39_04290	918729	918965	+	3	gip	237	0		918965		hypothetical protein		[img|Ga0113560_11873||hypothetical protein|][proka|PROKKA_00868||hypothetical protein|]
pgap	AYM39_04295	918962	919183	+	4	girp	222	0		919183		hypothetical protein		[img|Ga0113560_11874||hypothetical protein|][rast|416.8.peg.878||hypothetical protein|][proka|PROKKA_00869||hypothetical protein|]
pgap	AYM39_04300	919312	919755	+	1	g	444	0		919755		hypothetical protein
pgap	AYM39_04305	919960	920961	+	4	girp	1053	78.5		920961		hypothetical protein		[img|Ga0113560_11875||hypothetical protein|][rast|416.8.peg.879||hypothetical protein|][proka|PROKKA_00870||hypothetical protein|]
pgap	AYM39_04310	921084	921371	+	4	girp	306	73.1		921371		hypothetical protein		[img|Ga0113560_11876||hypothetical protein|][rast|416.8.peg.880||hypothetical protein|][proka|PROKKA_00871||hypothetical protein|]
pgap	AYM39_04315	921372	922619	-	4	girp	1257.8	19.5		921372		transposase		[img|Ga0113560_11877||Transposase (or an inactivated derivative)|][rast|416.8.peg.881||Mobile element protein|][proka|PROKKA_00872||Transposase, Mutator family|]
pgap	AYM39_04320	922721	923602	+	4	girp	877.5	3	pseudo	923602		[PSEUDO_pgap: transposase]		[img|Ga0113560_11878||Transposase, Mutator family|][rast|416.8.peg.882||Mobile element protein|][proka|PROKKA_00873||Transposase, Mutator family|]
pgap	AYM39_04325	923685	923987	+	3	gip	303	0		923987		hypothetical protein		[img|Ga0113560_11879||hypothetical protein|][proka|PROKKA_00874||hypothetical protein|]
pgap	AYM39_04330	924040	925026	+	4	girp	987	0		925026		hypothetical protein		[img|Ga0113560_11880||Site-specific recombinase XerD|][rast|416.8.peg.883||Phage integrase|][proka|PROKKA_00875|Int-Tn_1|Transposase from transposon Tn916|]
pgap	AYM39_04340	925325	926455	-	4	girp	1131	0		925325		fatty acid desaturase		[img|Ga0113560_11882||Fatty acid desaturase|][rast|416.8.peg.884||POSSIBLE LINOLEOYL-CoA DESATURASE (DELTA(6)-DESATURASE)|][proka|PROKKA_00877|desA3|Stearoyl-CoA 9-desaturase|1.14.19.-]
pgap	AYM39_04345	926866	927845	-	4	girp	821	106	pseudo	926866		[PSEUDO_pgap: transposase]		[img|Ga0113560_11883||transposase, IS5 family|][rast|416.8.peg.885||Mobile element protein|][proka|PROKKA_00878||Transposase DDE domain protein|]
pgap	AYM39_04350	928080	929441	-	4	girp	1364.2	1.5		928080		UDP-N-acetylglucosamine-peptide N-acetylglucosaminyltransferase		[img|Ga0113560_11884||Predicted O-linked N-acetylglucosamine transferase, SPINDLY family|][rast|416.8.peg.886||TPR domain protein, putative component of TonB system|][proka|PROKKA_00879||hypothetical protein|]
pgap	AYM39_04355	930052	931362	-	4	girp	1311	0		930052		hypothetical protein		[img|Ga0113560_11885||Hemolysin, contains CBS domains|][rast|416.8.peg.888||Magnesium and cobalt efflux protein CorC|][proka|PROKKA_00880|tlyC_2|Hemolysin C|]
pgap	AYM39_04360	931692	932219	+	4	girp	528	0		932219		hypothetical protein		[img|Ga0113560_11886||Type VI secretion system (T6SS), amidase effector protein 4|][rast|416.8.peg.889||hypothetical protein|][proka|PROKKA_00881||hypothetical protein|]
pgap	AYM39_04365	932216	932491	+	4	girp	276	0		932491		hypothetical protein		[img|Ga0113560_11887||hypothetical protein|][rast|416.8.peg.890||hypothetical protein|][proka|PROKKA_00882||hypothetical protein|]
pgap	AYM39_04370	932512	933726	-	4	girp	1215	0		932512		2-octaprenyl-6-methoxyphenyl hydroxylase		[img|Ga0113560_11888||2-octaprenyl-6-methoxyphenol hydroxylase|1.14.13.-][rast|416.8.peg.891||2-octaprenyl-6-methoxyphenol hydroxylase (EC 1.14.13.-)|][proka|PROKKA_00883|ubiH|2-octaprenyl-6-methoxyphenol hydroxylase|1.14.13.-]
pgap	AYM39_04375	933730	935037	-	4	girp	1308	0		933730		Xaa-Pro aminopeptidase		[img|Ga0113560_11889||Xaa-Pro aminopeptidase|3.4.11.9][rast|416.8.peg.892||Xaa-Pro aminopeptidase (EC 3.4.11.9)|3.4.11.9][proka|PROKKA_00884|pepP|Xaa-Pro aminopeptidase|3.4.11.9]
pgap	AYM39_04380	935049	935576	-	4	girp	547.5	22.5		935049		hypothetical protein		[img|Ga0113560_11890||hypothetical protein|][rast|416.8.peg.893||FIG001590: Putative conserved exported protein precursor|][proka|PROKKA_00885||hypothetical protein|]
pgap	AYM39_04385	935682	935909	+	4	girp	228	0		935909		hypothetical protein		[img|Ga0113560_11891||cell division protein ZapB|][rast|416.8.peg.894||hypothetical protein|][proka|PROKKA_00886||hypothetical protein|]
pgap	AYM39_04390	935906	936202	+	4	girp	297	0		936202		hypothetical protein		[img|Ga0113560_11892||cell division protein ZapA|][rast|416.8.peg.895||Z-ring-associated protein ZapA|][proka|PROKKA_00887|zapA|Cell division protein ZapA|]
pgap	AYM39_04400	936470	936649	-	2	gr	180	0		936470		hypothetical protein		[rast|416.8.peg.896||hypothetical protein|]
pgap	AYM39_04405	936864	937139	+	4	girp	190.5	57		937139		hypothetical protein		[img|Ga0113560_11893||hypothetical protein|][rast|416.8.peg.898||hypothetical protein|][proka|PROKKA_00888||hypothetical protein|]
pgap	AYM39_04410	937302	938609	-	4	girp	1308	0		937302		recombination factor protein RarA		[img|Ga0113560_11894||putative ATPase|][rast|416.8.peg.899||FIG065221: Holliday junction DNA helicase|][proka|PROKKA_00889|rarA|Replication-associated recombination protein A|]
pgap	AYM39_04415	938691	939668	+	4	girp	978	0		939668		acetyl-CoA carboxylase subunit alpha		[img|Ga0113560_11895|accA|acetyl-CoA carboxylase carboxyl transferase subunit alpha|6.4.1.2][rast|416.8.peg.900||Acetyl-coenzyme A carboxyl transferase alpha chain (EC 6.4.1.2)|6.4.1.2][proka|PROKKA_00890|accA|Acetyl-coenzyme A carboxylase carboxyl transferase subunit alpha|6.4.1.2]
pgap	AYM39_04420	939733	941079	+	4	girp	1350	6		941079		tRNA(Ile)-lysidine synthase		[img|Ga0113560_11896||tRNA(Ile)-lysidine synthase|6.3.4.19][rast|416.8.peg.901||tRNA(Ile)-lysidine synthetase (EC 6.3.4.19)|6.3.4.19][proka|PROKKA_00891|tilS|tRNA(Ile)-lysidine synthase|6.3.4.19]
pgap	AYM39_04425	941089	941277	+	4	girp	189	0		941277		hypothetical protein		[img|Ga0113560_11897||hypothetical protein|][rast|416.8.peg.902||hypothetical protein|][proka|PROKKA_00892||hypothetical protein|]
pgap	AYM39_04430	941280	941474	+	4	girp	195	0		941474		hypothetical protein		[img|Ga0113560_11898||hypothetical protein|][rast|416.8.peg.903||hypothetical protein|][proka|PROKKA_00893||hypothetical protein|]
pgap	AYM39_04435	941630	943270	+	4	girp	1641	0		943270	pyrG	CTP synthetase		[img|Ga0113560_11899|pyrG|CTP synthase|6.3.4.2][rast|416.8.peg.905||CTP synthase (EC 6.3.4.2)|6.3.4.2][proka|PROKKA_00894|pyrG|CTP synthase|6.3.4.2]
pgap	AYM39_04440	943283	944116	+	4	girp	834	0		944116		2-dehydro-3-deoxyphosphooctonate aldolase		[img|Ga0113560_11900|kdsA|2-dehydro-3-deoxyphosphooctonate aldolase (KDO 8-P synthase)|2.5.1.55][rast|416.8.peg.906||2-Keto-3-deoxy-D-manno-octulosonate-8-phosphate synthase (EC 2.5.1.55)|2.5.1.55][proka|PROKKA_00895|kdsA|2-dehydro-3-deoxyphosphooctonate aldolase|2.5.1.55]
pgap	AYM39_04445	944128	944733	+	4	girp	606	0		944733		restriction endonuclease		[img|Ga0113560_11901||Endonuclease, Uma2 family (restriction endonuclease fold)|][rast|416.8.peg.907||hypothetical protein|][proka|PROKKA_00896||hypothetical protein|]
pgap	AYM39_04450	944778	946058	+	4	girp	1281	0		946058	eno	enolase		[img|Ga0113560_11902||enolase|4.2.1.11][rast|416.8.peg.908||Enolase (EC 4.2.1.11)|4.2.1.11][proka|PROKKA_00897|eno|Enolase|4.2.1.11]
pgap	AYM39_04455	946176	946445	+	4	girp	241.5	22.1		946445		cell division protein FtsB		[img|Ga0113560_11903||cell division protein FtsB|][rast|416.8.peg.909||Cell division protein DivIC (FtsB), stabilizes FtsL against RasP cleavage|][proka|PROKKA_00898|ftsB|Cell division protein FtsB|]
pgap	AYM39_04460	946449	947144	+	4	girp	696	0		947144	ispD	2-C-methyl-D-erythritol 4-phosphate cytidylyltransferase		[img|Ga0113560_11904|ispD|2-C-methyl-D-erythritol 4-phosphate cytidylyltransferase|2.7.7.60][rast|416.8.peg.910||2-C-methyl-D-erythritol 4-phosphate cytidylyltransferase (EC 2.7.7.60)|2.7.7.60][proka|PROKKA_00899|ispD|2-C-methyl-D-erythritol 4-phosphate cytidylyltransferase|2.7.7.60]
pgap	AYM39_04465	947141	947614	+	4	girp	474	0		947614	ispF	2-C-methyl-D-erythritol 2,4-cyclodiphosphate synthase		[img|Ga0113560_11905|ispF|2-C-methyl-D-erythritol 2,4-cyclodiphosphate synthase|4.6.1.12][rast|416.8.peg.911||2-C-methyl-D-erythritol 2,4-cyclodiphosphate synthase (EC 4.6.1.12)|4.6.1.12][proka|PROKKA_00900|ispF|2-C-methyl-D-erythritol 2,4-cyclodiphosphate synthase|4.6.1.12]
pgap	AYM39_04470	947611	948645	+	4	girp	1035	0		948645		pseudouridine synthase		[img|Ga0113560_11906||tRNA pseudouridine13 synthase|5.4.99.27][rast|416.8.peg.912||tRNA pseudouridine 13 synthase (EC 4.2.1.-)|][proka|PROKKA_00901|truD|tRNA pseudouridine synthase D|5.4.99.27]
pgap	AYM39_04475	948772	950922	+	4	girp	2151	0		950922		ABC transporter		[img|Ga0113560_11907||ATP-binding cassette, subfamily C, LapB|][rast|416.8.peg.913||Type I secretion system ATPase, LssB family LapB|][proka|PROKKA_00902|apxIB_1|Toxin RTX-I translocation ATP-binding protein|]
pgap	AYM39_04480	950925	952283	+	4	girp	1359	0		952283		hemolysin secretion protein D		[img|Ga0113560_11908||membrane fusion protein, adhesin transport system|][rast|416.8.peg.914||Type I secretion system, membrane fusion protein LapC|][proka|PROKKA_00903|prsE_1|Type I secretion system membrane fusion protein PrsE|]
pgap	AYM39_04485	952309	952959	+	4	girp	630	42		952959		helix-turn-helix transcriptional regulator		[img|Ga0113560_11909||DNA-binding response regulator, NarL/FixJ family, contains REC and HTH domains|][rast|416.8.peg.915||probable two-component response regulator|][proka|PROKKA_00904|nreC|Oxygen regulatory protein NreC|]
pgap	AYM39_04490	952956	954284	+	4	girp	1318.5	21		954284		type I secretion protein TolC		[img|Ga0113560_11910||outer membrane protein, adhesin transport system|][rast|416.8.peg.916||Type I secretion system, outer membrane component LapE # AggA|][proka|PROKKA_00905|bepC_1|Outer membrane efflux protein BepC precursor|]
pgap	AYM39_04495	954778	955212	+	1	g	435	0		955212		hypothetical protein
pgap	AYM39_04500	955329	955940	+	3	gip	612	0		955940		methyltransferase type 11		[img|Ga0113560_11911||Methyltransferase domain-containing protein|][proka|PROKKA_00906||trans-aconitate 2-methyltransferase|]
pgap	AYM39_04505	956561	956857	+	3	gip	297	0		956857		hypothetical protein		[img|Ga0113560_11912||hypothetical protein|][proka|PROKKA_00907||hypothetical protein|]
pgap	AYM39_04510	957617	958747	-	4	girp	1146.8	10.5		957617		hypothetical protein		[img|Ga0113560_11913||diguanylate cyclase (GGDEF) domain-containing protein|][rast|416.8.peg.917||diguanylate cyclase/phosphodiesterase (GGDEF & EAL domains) with PAS/PAC sensor(s)|][proka|PROKKA_00908|yedQ|putative diguanylate cyclase YedQ|2.7.7.65]
pgap	AYM39_04515	959107	960231	+	4	girp	1125	0		960231		homocitrate synthase		[img|Ga0113560_11914||homocitrate synthase NifV|2.3.3.14][rast|416.8.peg.919||Homocitrate synthase (EC 2.3.3.14)|2.3.3.14][proka|PROKKA_00909|leuA_1|2-isopropylmalate synthase|2.3.3.13]
img	Ga0113560_11915	960243	960410	+	3	irp	159	15.6		960410		hypothetical protein		[rast|416.8.peg.920||hypothetical protein|][proka|PROKKA_00910||hypothetical protein|]
pgap	AYM39_04520	960407	961183	+	4	girp	776.2	1.5		961183		serine acetyltransferase		[img|Ga0113560_11916||serine O-acetyltransferase|2.3.1.30][rast|416.8.peg.921||Serine acetyltransferase (EC 2.3.1.30)|2.3.1.30][proka|PROKKA_00911|cysE_1|Serine acetyltransferase|2.3.1.30]
pgap	AYM39_04525	961183	961707	+	4	girp	525	0		961707		hypothetical protein		[img|Ga0113560_11917||hypothetical protein|][rast|416.8.peg.922||hypothetical protein|][proka|PROKKA_00912||hypothetical protein|]
img	Ga0113560_11918	961781	961903	+	3	irp	123	0		961903		hypothetical protein		[rast|416.8.peg.923||hypothetical protein|][proka|PROKKA_00913||hypothetical protein|]
pgap	AYM39_04530	961908	962222	+	4	girp	315	0		962222		nitrogen fixation protein NifW		[img|Ga0113560_11919||nitrogenase-stabilizing/protective protein|][rast|416.8.peg.924||Nitrogenase stabilizing/protective protein NifW|][proka|PROKKA_00914|nifW|Nitrogenase-stabilizing/protective protein NifW|]
pgap	AYM39_04535	962219	962695	+	4	girp	477	0		962695		nitrogen fixation protein NifZ		[img|Ga0113560_11920||nitrogen fixation protein NifZ|][rast|416.8.peg.925||NifZ protein|][proka|PROKKA_00915||NifZ domain protein|]
pgap	AYM39_04540	962697	963557	+	4	girp	861	0		963557		nitrogen fixation protein NifM		[img|Ga0113560_11921||peptidylprolyl isomerase/peptidyl-prolyl cis-trans isomerase C|5.2.1.8; 5.2.1.8][rast|416.8.peg.926||NifM protein|][proka|PROKKA_00916|prsA|Foldase protein PrsA precursor|5.2.1.8]
pgap	AYM39_04545	963559	964860	+	4	girp	1302	0		964860		ATP-dependent Clp protease ATP-binding subunit ClpX		[img|Ga0113560_11922||ATP-dependent Clp protease ATP-binding subunit ClpX|][rast|416.8.peg.927||ATP-dependent Clp protease ATP-binding subunit ClpX|][proka|PROKKA_00917|clpX_1|ATP-dependent Clp protease ATP-binding subunit ClpX|]
pgap	AYM39_04550	965612	966229	+	4	girp	618	0		966229		glutaredoxin		[img|Ga0113560_11923||monothiol glutaredoxin|][rast|416.8.peg.929||Glutaredoxin-related protein|][proka|PROKKA_00918|grxD_1|Glutaredoxin-4|]
pgap	AYM39_04555	966254	966784	+	4	girp	531	0		966784		flavodoxin		[img|Ga0113560_11924||flavodoxin I|][rast|416.8.peg.930||Flavodoxin 1|][proka|PROKKA_00919|nifF_1|Flavodoxin-2|]
pgap	AYM39_04560	966797	967240	+	4	girp	444	0		967240		sigma E positive regulator RseC/MucC		[img|Ga0113560_11925||sigma-E factor negative regulatory protein RseC|][rast|416.8.peg.931||Sigma factor RpoE regulatory protein RseC|][proka|PROKKA_00920||SoxR reducing system protein RseC|]
pgap	AYM39_04565	967495	967806	+	4	girp	312	0		967806		hypothetical protein		[img|Ga0113560_11926||hypothetical protein|][rast|416.8.peg.932||hypothetical protein|][proka|PROKKA_00921||hypothetical protein|]
pgap	AYM39_04570	967954	968640	+	4	girp	687	0		968640		molybdenum ABC transporter permease		[img|Ga0113560_11927||molybdate transport system permease protein|][rast|416.8.peg.933||Molybdenum transport system permease protein ModB (TC 3.A.1.8.1)|][proka|PROKKA_00922|modB_1|Molybdenum transport system permease protein ModB|]
pgap	AYM39_04575	968637	969719	+	4	girp	1083	0		969719		molybdenum ABC transporter ATP-binding protein		[img|Ga0113560_11928||molybdate transport system ATP-binding protein|3.6.3.29][rast|416.8.peg.934||Molybdenum transport ATP-binding protein ModC (TC 3.A.1.8.1)|][proka|PROKKA_00923|cysA_1|Sulfate/thiosulfate import ATP-binding protein CysA|3.6.3.25]
pgap	AYM39_04580	969988	971730	+	4	girp	1743	0		971730		hypothetical protein		[img|Ga0113560_11929||FHA domain-containing protein|][rast|416.8.peg.935||Serine protease precursor MucD/AlgY associated with sigma factor RpoE|][proka|PROKKA_00924|hhoB|Putative serine protease HhoB precursor|]
pgap	AYM39_04585	971736	972590	+	4	girp	861.8	4.5		972590		hypothetical protein		[img|Ga0113560_11930||protein phosphatase|3.1.3.16][rast|416.8.peg.936||Protein serine/threonine phosphatase PrpC, regulation of stationary phase|][proka|PROKKA_00925||Putative protein phosphatase 2C-type|3.1.3.16]
pgap	AYM39_04590	972604	973917	+	4	girp	1314	0		973917		hypothetical protein		[img|Ga0113560_11931||serine/threonine protein kinase|2.7.11.1][rast|416.8.peg.937||Serine/threonine protein kinase PrkC, regulator of stationary phase|][proka|PROKKA_00926|pknB_1|Serine/threonine-protein kinase PknB|2.7.11.1]
pgap	AYM39_04595	973948	974544	+	4	girp	597	0		974544		hypothetical protein		[img|Ga0113560_11932||hypothetical protein|][rast|416.8.peg.938||hypothetical protein|][proka|PROKKA_00927||hypothetical protein|]
pgap	AYM39_04600	974682	976361	+	4	girp	1680	0		976361		forkhead-associated protein		[img|Ga0113560_11933||Transglycosylase SLT domain-containing protein|][rast|416.8.peg.939||Membrane-bound lytic murein transglycosylase D precursor (EC 3.2.1.-)|][proka|PROKKA_00928|embR|Transcriptional regulatory protein EmbR|]
pgap	AYM39_04605	976408	977262	-	4	girp	855	0		976408		hypothetical protein		[img|Ga0113560_11934||SIR2-like domain-containing protein|][rast|416.8.peg.940||hypothetical protein|][proka|PROKKA_00929||hypothetical protein|]
pgap	AYM39_04610	977255	977560	-	1	g	306	0		977255		hypothetical protein
pgap	AYM39_04615	978030	979214	+	4	girp	1185	0		979214		hypothetical protein		[img|Ga0113560_11935||hypothetical protein|][rast|416.8.peg.941||hypothetical protein|][proka|PROKKA_00930|hcf136|Ycf48-like protein|]
pgap	AYM39_04620	979220	979498	+	4	girp	279	0		979498		hypothetical protein		[img|Ga0113560_11936||hypothetical protein|][rast|416.8.peg.942||hypothetical protein|][proka|PROKKA_00931||hypothetical protein|]
pgap	AYM39_04625	979501	980034	-	4	girp	534	0		979501		hypothetical protein		[img|Ga0113560_11937||hypothetical protein|][rast|416.8.peg.943||hypothetical protein|][proka|PROKKA_00932||hypothetical protein|]
pgap	AYM39_04630	980172	980654	+	4	girp	483	0		980654		YajQ family cyclic di-GMP-binding protein		[img|Ga0113560_11938||hypothetical protein|][rast|416.8.peg.944||FIG001943: hypothetical protein YajQ|][proka|PROKKA_00933||putative nucleotide-binding protein|]
pgap	AYM39_04635	980673	981326	+	4	girp	655.5	1.7		981326		thiol-disulfide isomerase		[img|Ga0113560_11939||AhpC/TSA family protein|][rast|416.8.peg.945||hypothetical protein|][proka|PROKKA_00934||Redoxin|]
pgap	AYM39_04640	981376	982857	+	4	girp	1482	0		982857		ATP-binding protein		[img|Ga0113560_11940||hypothetical protein|][rast|416.8.peg.946||hypothetical protein|][proka|PROKKA_00935||AAA-like domain protein|]
pgap	AYM39_04645	982938	983312	+	4	girp	375	0		983312		glyoxalase		[img|Ga0113560_11941||hypothetical protein|][rast|416.8.peg.947||Glyoxalase family protein|][proka|PROKKA_00936||Glyoxalase-like domain protein|]
pgap	AYM39_04650	983330	984016	+	4	girp	687	0		984016		DNA-binding transcriptional regulator		[img|Ga0113560_11942||Predicted DNA-binding transcriptional regulator YafY, contains an HTH and WYL domains|][rast|416.8.peg.948||Transcriptional regulator, DeoR family|][proka|PROKKA_00937||bifunctional biotin--[acetyl-CoA-carboxylase] synthetase/biotin operon repressor|]
pgap	AYM39_04655	984134	985552	+	4	girp	1433.2	28.5		985552		phosphomannomutase		[img|Ga0113560_11943||phosphomannomutase|5.4.2.8][rast|416.8.peg.949||Phosphomannomutase (EC 5.4.2.8)|5.4.2.8][proka|PROKKA_00938|glmM_1|Phosphoglucosamine mutase|5.4.2.10]
pgap	AYM39_04660	985650	986096	+	4	girp	447	0		986096		hypothetical protein		[img|Ga0113560_11944||hypothetical protein|][rast|416.8.peg.950||Conserved domain protein|][proka|PROKKA_00939||hypothetical protein|]
pgap	AYM39_04665	986430	986687	+	4	girp	327.8	46.5		986687		hypothetical protein		[img|Ga0113560_11945||hypothetical protein|][rast|416.8.peg.951||hypothetical protein|][proka|PROKKA_00940||hypothetical protein|]
pgap	AYM39_04670	986789	987379	-	4	girp	591	0		986789		potassium-transporting ATPase subunit C		[img|Ga0113560_11946||K+-transporting ATPase ATPase C chain|3.6.3.12][rast|416.8.peg.952||Potassium-transporting ATPase C chain (EC 3.6.3.12) (TC 3.A.3.7.1)|3.6.3.12][proka|PROKKA_00941|kdpC|Potassium-transporting ATPase C chain|3.6.3.12]
pgap	AYM39_04675	987389	989542	-	4	girp	2154	0		987389		potassium-transporting ATPase subunit B		[img|Ga0113560_11947||K+-transporting ATPase ATPase B chain|3.6.3.12][rast|416.8.peg.953||Potassium-transporting ATPase B chain (EC 3.6.3.12) (TC 3.A.3.7.1)|3.6.3.12][proka|PROKKA_00942|kdpB|Potassium-transporting ATPase B chain|3.6.3.12]
pgap	AYM39_04680	989689	991494	-	4	girp	1806	0		989689		ATPase		[img|Ga0113560_11948||K+-transporting ATPase ATPase A chain|3.6.3.12][rast|416.8.peg.954||Potassium-transporting ATPase A chain (EC 3.6.3.12) (TC 3.A.3.7.1)|3.6.3.12][proka|PROKKA_00943|kdpA|Potassium-transporting ATPase A chain|3.6.3.12]
pgap	AYM39_04685	991494	991583	-	3	gip	90	0		991494		potassium-transporting ATPase		[img|Ga0113560_11949||K+-transporting ATPase, KdpF subunit|][proka|PROKKA_00944||F subunit of K+-transporting ATPase (Potass_KdpF)|]
img	Ga0113560_11950	991580	991672	-	2	ip	93	0		991580		hypothetical protein		[proka|PROKKA_00945||hypothetical protein|]
pgap	AYM39_04690	992021	992500	-	4	girp	480	0		992021		alkyl hydroperoxide reductase		[img|Ga0113560_11951||peroxiredoxin Q/BCP|1.11.1.15][rast|416.8.peg.956||Thiol peroxidase, Bcp-type (EC 1.11.1.15)|1.11.1.15][proka|PROKKA_00946|bcp_1|Putative peroxiredoxin bcp|1.11.1.15]
pgap	AYM39_04695	992733	993410	-	4	girp	678	0		992733		ribose-5-phosphate isomerase		[img|Ga0113560_11952||ribose 5-phosphate isomerase A|5.3.1.6][rast|416.8.peg.957||Ribose 5-phosphate isomerase A (EC 5.3.1.6)|5.3.1.6][proka|PROKKA_00947|rpiA_1|Ribose-5-phosphate isomerase A|5.3.1.6]
pgap	AYM39_04700	993439	994467	-	4	girp	1029	0		993439		UDP-3-O-(3-hydroxymyristoyl)glucosamine N-acyltransferase		[img|Ga0113560_11953||UDP-3-O-[3-hydroxymyristoyl] glucosamine N-acyltransferase|2.3.1.191][rast|416.8.peg.958||UDP-3-O-[3-hydroxymyristoyl] glucosamine N-acyltransferase (EC 2.3.1.191)|2.3.1.191][proka|PROKKA_00948|lpxD|UDP-3-O-acylglucosamine N-acyltransferase|2.3.1.-]
pgap	AYM39_04705	994476	996704	-	4	girp	2229	0		994476		hypothetical protein		[img|Ga0113560_11954||hypothetical protein|][rast|416.8.peg.959||membrane protein/conserved domain protein|][proka|PROKKA_00949||spermidine synthase|]
pgap	AYM39_04710	997232	1001110	-	4	girp	4095.8	220.7		997232		hypothetical protein		[img|Ga0113560_11955||Ca2+-binding protein, RTX toxin-related|][rast|416.8.peg.961||Alkaline phosphatase (EC 3.1.3.1)|3.1.3.1][proka|PROKKA_00950|cya_1|Bifunctional hemolysin/adenylate cyclase precursor|]
pgap	AYM39_04715	1002013	1002390	+	4	girp	351	18		1002390		hypothetical protein		[img|Ga0113560_11956||hypothetical protein|][rast|416.8.peg.962||hypothetical protein|][proka|PROKKA_00951||hypothetical protein|]
pgap	AYM39_04720	1002761	1003603	+	4	girp	849	6.9		1003603		flagellin		[img|Ga0113560_11957||flagellin|][rast|416.8.peg.964||Flagellin protein FlaA|][proka|PROKKA_00952|hag_1|Flagellin|]
pgap	AYM39_04725	1003628	1006135	+	4	girp	2508	0		1006135		hypothetical protein		[img|Ga0113560_11958||Protein of unknown function DUF115|][rast|416.8.peg.965||Conserved protein|][proka|PROKKA_00953||hypothetical protein|]
pgap	AYM39_04730	1006202	1006396	+	4	girp	195	0		1006396		hypothetical protein		[img|Ga0113560_11959||hypothetical protein|][rast|416.8.peg.966||hypothetical protein|][proka|PROKKA_00954||hypothetical protein|]
pgap	AYM39_04735	1006413	1007213	-	4	girp	801	0		1006413		phosphohydrolase		[img|Ga0113560_11960||ABC-type uncharacterized transport system, permease component|][rast|416.8.peg.967||CcsA-related protein|][proka|PROKKA_00955|ypjD|Inner membrane protein YpjD|]
pgap	AYM39_04740	1007339	1008694	+	4	girp	1356	0		1008694		signal recognition particle		[img|Ga0113560_11961||signal recognition particle subunit SRP54|][rast|416.8.peg.968||Signal recognition particle, subunit Ffh SRP54 (TC 3.A.5.1.1)|][proka|PROKKA_00956|ffh|Signal recognition particle protein|]
pgap	AYM39_04745	1008783	1009034	+	4	girp	252	0		1009034	rpsP	30S ribosomal protein S16		[img|Ga0113560_11962|rpsP|small subunit ribosomal protein S16|][rast|416.8.peg.969||SSU ribosomal protein S16p|][proka|PROKKA_00957|rpsP|30S ribosomal protein S16|]
pgap	AYM39_04750	1009044	1009553	+	4	girp	450.8	118.5		1009553		ribosome maturation factor RimM		[img|Ga0113560_11963||16S rRNA processing protein RimM|][rast|416.8.peg.971||16S rRNA processing protein RimM|][proka|PROKKA_00958|rimM|Ribosome maturation factor RimM|]
pgap	AYM39_04755	1009560	1010300	+	4	girp	741	0		1010300		tRNA (guanine-N1)-methyltransferase		[img|Ga0113560_11964||tRNA (guanine37-N1)-methyltransferase|2.1.1.228][rast|416.8.peg.972||tRNA (Guanine37-N1) -methyltransferase (EC 2.1.1.31)|2.1.1.31][proka|PROKKA_00959|trmD|tRNA (guanine-N(1)-)-methyltransferase|2.1.1.228]
pgap	AYM39_04760	1010313	1010660	+	4	girp	348	0		1010660		50S ribosomal protein L19		[img|Ga0113560_11965|rplS|large subunit ribosomal protein L19|][rast|416.8.peg.973||LSU ribosomal protein L19p|][proka|PROKKA_00960|rplS|50S ribosomal protein L19|]
pgap	AYM39_04765	1010750	1011259	+	4	girp	510	0		1011259		cysteine methyltransferase		[img|Ga0113560_11966||methylated-DNA-[protein]-cysteine S-methyltransferase|2.1.1.63][rast|416.8.peg.974||Methylated-DNA--protein-cysteine methyltransferase (EC 2.1.1.63)|2.1.1.63][proka|PROKKA_00961|ada_1|Bifunctional transcriptional activator/DNA repair enzyme Ada|]
pgap	AYM39_04770	1011256	1012140	+	4	girp	892.5	8.7		1012140		recombinase XerD		[img|Ga0113560_11967||integrase/recombinase XerD|][rast|416.8.peg.975||Tyrosine recombinase XerD|][proka|PROKKA_00962|xerD_1|Tyrosine recombinase XerD|]
pgap	AYM39_04775	1012143	1012928	+	4	girp	786	0		1012928		acyl-[acyl-carrier-protein]--UDP-N- acetylglucosamine O-acyltransferase		[img|Ga0113560_11968||UDP-N-acetylglucosamine acyltransferase|2.3.1.129][rast|416.8.peg.976||Acyl-[acyl-carrier-protein]--UDP-N- acetylglucosamine O-acyltransferase (EC 2.3.1.129)|2.3.1.129][proka|PROKKA_00963|lpxA_1|Acyl-[acyl-carrier-protein]--UDP-N- acetylglucosamine O-acyltransferase|2.3.1.129]
pgap	AYM39_04780	1013018	1013440	+	4	girp	423	0		1013440		hypothetical protein		[img|Ga0113560_11969||hypothetical protein|][rast|416.8.peg.977||hypothetical protein|][proka|PROKKA_00964||transcriptional regulator NarL|]
pgap	AYM39_04785	1013442	1015568	-	4	girp	2127	0		1013442		TonB-dependent receptor		[img|Ga0113560_11970||iron complex outermembrane recepter protein|][rast|416.8.peg.978||TonB-dependent receptor; Outer membrane receptor for ferrienterochelin and colicins|][proka|PROKKA_00965|cirA_2|Colicin I receptor precursor|]
pgap	AYM39_04790	1015577	1017937	-	4	girp	2361	0		1015577		diguanylate cyclase		[img|Ga0113560_11971||PAS domain S-box-containing protein/diguanylate cyclase (GGDEF) domain-containing protein|][rast|416.8.peg.979||diguanylate cyclase/phosphodiesterase (GGDEF & EAL domains) with PAS/PAC sensor(s)|][proka|PROKKA_00966|yegE_1|putative diguanylate cyclase YegE|2.7.7.65]
pgap	AYM39_04795	1017930	1018511	-	4	girp	564	20.8		1017930		hypothetical protein		[img|Ga0113560_11972||protein of unknown function (DUF4154)|][rast|416.8.peg.980||putative transmembrane protein|][proka|PROKKA_00967||hypothetical protein|]
pgap	AYM39_04800	1018558	1019859	-	4	girp	1302	0		1018558		aminopeptidase		[img|Ga0113560_11973||aspartyl aminopeptidase|3.4.11.21][rast|416.8.peg.981||Aspartyl aminopeptidase|][proka|PROKKA_00968|apeB|putative M18 family aminopeptidase 2|3.4.11.-]
pgap	AYM39_04805	1019856	1020251	-	4	girp	396	0		1019856		peptide methionine sulfoxide reductase		[img|Ga0113560_11974||peptide-methionine (R)-S-oxide reductase|1.8.4.12][rast|416.8.peg.982||Peptide methionine sulfoxide reductase MsrB (EC 1.8.4.12)|1.8.4.12][proka|PROKKA_00969|msrB|Peptide methionine sulfoxide reductase MsrB|1.8.4.12]
pgap	AYM39_04810	1020452	1021729	+	4	girp	1278	0		1021729		pyridine nucleotide-disulfide oxidoreductase		[img|Ga0113560_11975||sulfide:quinone oxidoreductase|1.8.5.-][rast|416.8.peg.983||FAD-dependent pyridine nucleotide-disulphide oxidoreductase|][proka|PROKKA_00970||dihydrolipoamide dehydrogenase|]
pgap	AYM39_04815	1021739	1021939	+	4	girp	201	0		1021939		sulfurtransferase		[img|Ga0113560_11976||Protein of unknown function (DUF2892)|][rast|416.8.peg.984||Rhodanese-related sulfurtransferase|][proka|PROKKA_00971||hypothetical protein|]
pgap	AYM39_04820	1022130	1022600	+	4	girp	471	0		1022600		hypothetical protein		[img|Ga0113560_11977||molecular chaperone IbpA|][rast|416.8.peg.986||16 kDa heat shock protein A|][proka|PROKKA_00972|ibpA|Small heat shock protein IbpA|]
pgap	AYM39_04825	1022689	1023138	+	4	girp	508.5	39		1023138		hypothetical protein		[img|Ga0113560_11978||Uncharacterized membrane protein, DUF373 family|][rast|416.8.peg.987||hypothetical protein|][proka|PROKKA_00973||Phosphate-starvation-inducible E|]
pgap	AYM39_04830	1023142	1023996	-	4	girp	855	0		1023142		ion transporter		[img|Ga0113560_11979||voltage-gated potassium channel|][rast|416.8.peg.988||Potassium voltage-gated channel subfamily KQT; possible potassium channel, VIC family|][proka|PROKKA_00974||Cyclic nucleotide-gated potassium channel|]
pgap	AYM39_04835	1024189	1025661	+	4	girp	1482	18		1025661		nitrogen fixation protein NifE		[img|Ga0113560_11980||nitrogenase molybdenum-cofactor synthesis protein NifE|][rast|416.8.peg.989||Nitrogenase FeMo-cofactor scaffold and assembly protein NifE|][proka|PROKKA_00975|nifD_1|Nitrogenase molybdenum-iron protein alpha chain|1.18.6.1]
pgap	AYM39_04840	1025676	1027073	+	4	girp	1398	0		1027073		nitrogen fixation protein NifN		[img|Ga0113560_11981||nitrogenase molybdenum-iron protein NifN|][rast|416.8.peg.990||Nitrogenase FeMo-cofactor scaffold and assembly protein NifN|][proka|PROKKA_00976|nifK_1|Nitrogenase molybdenum-iron protein beta chain|1.18.6.1]
pgap	AYM39_04845	1027064	1027549	+	4	girp	445.5	27		1027549		nitrogen fixation protein NifX		[img|Ga0113560_11982||nitrogen fixation protein NifX|][rast|416.8.peg.991||Nitrogenase FeMo-cofactor carrier protein NifX|][proka|PROKKA_00977||Dinitrogenase iron-molybdenum cofactor|]
pgap	AYM39_04850	1028095	1028568	+	4	girp	474	0		1028568		hypothetical protein		[img|Ga0113560_11983||probable nitrogen fixation protein|][rast|416.8.peg.992||NifX-associated protein|][proka|PROKKA_00978||hypothetical protein|]
pgap	AYM39_04855	1028577	1028792	+	4	girp	216	0		1028792		hypothetical protein		[img|Ga0113560_11984||Rop-like|][rast|416.8.peg.993||Protein of unknown function DUF683|][proka|PROKKA_00979||hypothetical protein|]
pgap	AYM39_04860	1028801	1029112	+	4	girp	312	0		1029112		ferredoxin		[img|Ga0113560_11985||ferredoxin III, nif-specific|][rast|416.8.peg.994||4Fe-4S ferredoxin, nitrogenase-associated|][proka|PROKKA_00980|fdxB|Ferredoxin-3|]
img	Ga0113560_11986	1029666	1029884	+	2	ip	219	0		1029884		hypothetical protein		[proka|PROKKA_00981||hypothetical protein|]
pgap	AYM39_04865	1029928	1030251	+	4	girp	324	0		1030251		ferredoxin		[img|Ga0113560_11987||(2Fe-2S) ferredoxin|][rast|416.8.peg.996||Ferredoxin, 2Fe-2S|][proka|PROKKA_00982||Ferredoxin, 2Fe-2s|]
pgap	AYM39_04870	1030255	1030761	+	4	girp	507	0		1030761		hypothetical protein		[img|Ga0113560_11988||hypothetical protein|][rast|416.8.peg.997||hypothetical protein|][proka|PROKKA_00983||hypothetical protein|]
pgap	AYM39_04875	1030758	1031135	+	4	girp	378	0		1031135		hypothetical protein		[img|Ga0113560_11989||hypothetical protein|][rast|416.8.peg.998||hypothetical protein|][proka|PROKKA_00984||hypothetical protein|]
pgap	AYM39_04880	1031145	1032107	+	4	girp	963	0		1032107		hypothetical protein		[img|Ga0113560_11990||hypothetical protein|][rast|416.8.peg.999||Molybdenum transport ATP-binding protein ModC (TC 3.A.1.8.1)|][proka|PROKKA_00985||hypothetical protein|]
pgap	AYM39_04885	1032111	1032560	+	4	girp	450	0		1032560		hypothetical protein		[img|Ga0113560_11991||hypothetical protein|][rast|416.8.peg.1000||hypothetical protein|][proka|PROKKA_00986||hypothetical protein|]
pgap	AYM39_04890	1032574	1033830	+	4	girp	1266	6		1033830		hypothetical protein		[img|Ga0113560_11992||glycolate oxidase iron-sulfur subunit|][rast|416.8.peg.1001||Glycolate dehydrogenase (EC 1.1.99.14), iron-sulfur subunit GlcF|1.1.99.14][proka|PROKKA_00987|lutA_1|Lactate utilization protein A|]
pgap	AYM39_04895	1033927	1034940	+	4	girp	1014	0		1034940		tryptophan--tRNA ligase		[img|Ga0113560_11993|trpS|tryptophanyl-tRNA synthetase|6.1.1.2][rast|416.8.peg.1002||Tryptophanyl-tRNA synthetase (EC 6.1.1.2)|6.1.1.2][proka|PROKKA_00988|trpS|Tryptophan--tRNA ligase|6.1.1.2]
pgap	AYM39_04900	1034993	1035745	+	4	girp	759.8	4.5		1035745		hypothetical protein		[img|Ga0113560_11994||Uncharacterized SAM-binding protein YcdF, DUF218 family|][rast|416.8.peg.1003||Putative membrane protein|][proka|PROKKA_00989||hypothetical protein|]
pgap	AYM39_04905	1036758	1036955	+	1	g	198	0		1036955		hypothetical protein
pgap	AYM39_04910	1037277	1038256	-	4	girp	821	106	pseudo	1037277		[PSEUDO_pgap: transposase]		[img|Ga0113560_11995||transposase, IS5 family|][rast|416.8.peg.1005||Mobile element protein|][proka|PROKKA_00990||Transposase DDE domain protein|]
pgap	AYM39_04915	1038449	1040167	-	4	girp	1930.5	141		1038449		hypothetical protein		[img|Ga0113560_11996||Peptidoglycan/LPS O-acetylase OafA/YrhL, contains acyltransferase and SGNH-hydrolase domains|][rast|416.8.peg.1006||O-antigen acetylase|][proka|PROKKA_00991|oatA_1|O-acetyltransferase OatA|2.3.1.-]
pgap	AYM39_04920	1040835	1042061	-	4	girp	1227	0		1040835		transposase		[img|Ga0113560_11997||putative transposase|][rast|416.8.peg.1007||Mobile element protein|][proka|PROKKA_00992||Transposase, Mutator family|]
pgap	AYM39_04925	1042281	1042568	-	4	girp	281.2	13.5		1042281		hypothetical protein		[img|Ga0113560_11998||Transposase domain (DUF772)|][rast|416.8.peg.1008||Mobile element protein|][proka|PROKKA_00993||hypothetical protein|]
img	Ga0113560_11999	1042735	1042863	-	3	irp	129	0		1042735		hypothetical protein		[rast|416.8.peg.1010||hypothetical protein|][proka|PROKKA_00994||hypothetical protein|]
pgap	AYM39_04930	1043123	1043710	-	4	girp	566.2	43.5		1043123		hypothetical protein		[img|Ga0113560_111000||Protein of unknown function (DUF2799)|][rast|416.8.peg.1011||ATPase involved in DNA repair|][proka|PROKKA_00995||lipoprotein|]
pgap	AYM39_04935	1043700	1044986	-	4	girp	1314	18		1043700		alpha-ketoglutarate transporter		[img|Ga0113560_111001||MFS transporter, MHS family, alpha-ketoglutarate permease|][rast|416.8.peg.1012||Alpha-ketoglutarate permease|][proka|PROKKA_00996|kgtP|Alpha-ketoglutarate permease|]
pgap	AYM39_04940	1045041	1045514	-	4	girp	490.5	19.1		1045041		hypothetical protein		[img|Ga0113560_111002||ProP effector|][rast|416.8.peg.1013||Activator of osmoprotectant transporter ProP|][proka|PROKKA_00997|proQ|ProP effector|]
pgap	AYM39_04945	1046014	1047315	+	4	girp	1315.5	9		1047315		hypothetical protein		[img|Ga0113560_111003||hypothetical protein|][rast|416.8.peg.1014||hypothetical protein|][proka|PROKKA_00998||Alpha/beta hydrolase family protein|]
pgap	AYM39_04950	1047323	1047943	-	4	girp	621	0		1047323	nudF	ADP-ribose pyrophosphatase		[img|Ga0113560_111004||ADP-ribose pyrophosphatase|3.6.1.13][rast|416.8.peg.1015||ADP-ribose pyrophosphatase (EC 3.6.1.13)|3.6.1.13][proka|PROKKA_00999|nudF|ADP-ribose pyrophosphatase|3.6.1.13]
pgap	AYM39_04955	1047940	1049049	-	4	girp	1110	0		1047940		sorbosone dehydrogenase		[img|Ga0113560_111005||Glucose/arabinose dehydrogenase, beta-propeller fold|][rast|416.8.peg.1016||Glucose/sorbosone dehydrogenases|][proka|PROKKA_01000||Glucose / Sorbosone dehydrogenase|]
pgap	AYM39_04960	1049164	1050039	+	4	girp	876	0		1050039		zinc metalloprotease HtpX		[img|Ga0113560_111006||heat shock protein HtpX|3.4.24.-][rast|416.8.peg.1017||Heat shock protein HtpX|][proka|PROKKA_01001|htpX_2|Protease HtpX|3.4.24.-]
pgap	AYM39_04965	1050083	1050310	+	4	girp	228	0		1050310		topoisomerase II		[img|Ga0113560_111007||Protein of unknown function (DUF2835)|][rast|416.8.peg.1018||hypothetical protein|][proka|PROKKA_01002||hypothetical protein|]
pgap	AYM39_04970	1050335	1051096	-	4	girp	762	0		1050335		hypothetical protein		[img|Ga0113560_111008||diguanylate cyclase (GGDEF) domain-containing protein|][rast|416.8.peg.1019||diguanylate cyclase/phosphodiesterase (GGDEF & EAL domains) with PAS/PAC sensor(s)|][proka|PROKKA_01003|ydaM_1|putative diguanylate cyclase YdaM|2.7.7.65]
pgap	AYM39_04975	1051095	1051349	+	2	gr	204	72.1		1051349		hypothetical protein		[rast|416.8.peg.1020||hypothetical protein|]
pgap	AYM39_04980	1051364	1052476	-	4	girp	1113	0		1051364		oxidoreductase		[img|Ga0113560_111009||2,4-dienoyl-CoA reductase|][rast|416.8.peg.1021||NADH:flavin oxidoreductase/NADH oxidase|][proka|PROKKA_01004|namA|NADPH dehydrogenase|1.6.99.1]
pgap	AYM39_04985	1052475	1052735	+	3	gip	249	10.4		1052735		hypothetical protein		[img|Ga0113560_111010||hypothetical protein|][proka|PROKKA_01005||hypothetical protein|]
pgap	AYM39_04990	1052732	1053388	+	4	girp	654.8	4.5		1053388		hypothetical protein		[img|Ga0113560_111011||PEP-CTERM protein-sorting domain-containing protein|][rast|416.8.peg.1023||hypothetical protein|][proka|PROKKA_01006||hypothetical protein|]
pgap	AYM39_04995	1053430	1054098	+	4	girp	633.8	70.5		1054098		hypothetical protein		[img|Ga0113560_111012||hypothetical protein|][rast|416.8.peg.1024||hypothetical protein|][proka|PROKKA_01007||hypothetical protein|]
img	Ga0113560_111013	1054335	1054484	+	3	irp	150	0		1054484		hypothetical protein		[rast|416.8.peg.1025||hypothetical protein|][proka|PROKKA_01008||hypothetical protein|]
pgap	AYM39_05000	1054554	1055477	-	4	girp	944.2	13.5		1054554		hypothetical protein		[img|Ga0113560_111014||hypothetical protein|][rast|416.8.peg.1026||hypothetical protein|][proka|PROKKA_01009||hypothetical protein|]
pgap	AYM39_05005	1055588	1056217	-	4	girp	630	0		1055588		molybdenum cofactor guanylyltransferase		[img|Ga0113560_111015||molybdopterin-guanine dinucleotide biosynthesis protein A|2.7.7.77][rast|416.8.peg.1027||Molybdopterin-guanine dinucleotide biosynthesis protein MobA|][proka|PROKKA_01010|mobA|Molybdenum cofactor guanylyltransferase|2.7.7.77]
pgap	AYM39_05010	1056235	1056693	+	4	girp	438.8	40.5		1056693		hypothetical protein		[img|Ga0113560_111016||protein of unknown function DUF302|][rast|416.8.peg.1028||lipoprotein, putative|][proka|PROKKA_01011||hypothetical protein|]
pgap	AYM39_05015	1056724	1057122	+	4	girp	399	0		1057122		hypothetical protein		[img|Ga0113560_111017||hypothetical protein|][rast|416.8.peg.1029||hypothetical protein|][proka|PROKKA_01012||hypothetical protein|]
pgap	AYM39_05020	1057219	1057749	+	4	girp	544.5	9		1057749		hypothetical protein		[img|Ga0113560_111018||hypothetical protein|][rast|416.8.peg.1030||hypothetical protein|][proka|PROKKA_01013||hypothetical protein|]
pgap	AYM39_05030	1059446	1060066	-	3	gip	637	13.9		1059446		2OG-Fe(II) oxygenase		[img|Ga0113560_111020||Alkylated DNA repair dioxygenase AlkB|][proka|PROKKA_01015||hypothetical protein|]
pgap	AYM39_05025	1057756	1059507	+	4	girp	1752	0		1059507		hypothetical protein		[img|Ga0113560_111019||Phosphoglycerol transferase MdoB|][rast|416.8.peg.1031||Sulfatase|][proka|PROKKA_01014||phosphoglycerol transferase I|]
pgap	AYM39_05035	1060109	1061770	-	4	girp	1662	0		1060109		hypothetical protein		[img|Ga0113560_111021||putative transport protein|][rast|416.8.peg.1032||Putative transport protein|][proka|PROKKA_01016||putative transporter|]
pgap	AYM39_05040	1061905	1062474	+	4	girp	570	0		1062474		cytochrome C		[img|Ga0113560_111022||Cytochrome c553|][rast|416.8.peg.1033||Cytochrome c4|][proka|PROKKA_01017|cc4_2|Cytochrome c4 precursor|]
pgap	AYM39_05045	1062505	1063020	-	4	girp	500.2	31.5		1062505		hypothetical protein		[img|Ga0113560_111023||hypothetical protein|][rast|416.8.peg.1034||Proline-rich region|][proka|PROKKA_01018||hypothetical protein|]
pgap	AYM39_05050	1063034	1063429	-	4	girp	381	30		1063034		hypothetical protein		[img|Ga0113560_111024||hypothetical protein|][rast|416.8.peg.1035||hypothetical protein|][proka|PROKKA_01019||hypothetical protein|]
pgap	AYM39_05055	1063437	1064888	-	4	girp	1452	0		1063437		histidine kinase		[img|Ga0113560_111025||Signal transduction histidine kinase|][rast|416.8.peg.1036||Copper sensory histidine kinase CpxA|][proka|PROKKA_01020|cpxA_1|Sensor protein CpxA|2.7.13.3]
pgap	AYM39_05060	1064890	1065576	-	4	girp	696	18		1064890		two-component system response regulator		[img|Ga0113560_111026||two-component system, OmpR family, response regulator CpxR|][rast|416.8.peg.1037||Copper-sensing two-component system response regulator CpxR|][proka|PROKKA_01021|phoP|Alkaline phosphatase synthesis transcriptional regulatory protein PhoP|]
pgap	AYM39_05065	1065760	1066203	+	4	girp	444	0		1066203		hypothetical protein		[img|Ga0113560_111027||protein refolding chaperone Spy/CpxP family|][rast|416.8.peg.1038||hypothetical protein|][proka|PROKKA_01022|spy|Spheroplast protein Y precursor|]
pgap	AYM39_05070	1066419	1067546	+	4	girp	1128	0		1067546		carbamoyl phosphate synthase small subunit		[img|Ga0113560_111028||carbamoyl-phosphate synthase small subunit|6.3.5.5][rast|416.8.peg.1039||Carbamoyl-phosphate synthase small chain (EC 6.3.5.5)|6.3.5.5][proka|PROKKA_01023|carA|Carbamoyl-phosphate synthase small chain|6.3.5.5]
pgap	AYM39_05075	1067568	1070789	+	4	girp	3222	0		1070789	carB	carbamoyl phosphate synthase large subunit		[img|Ga0113560_111029||carbamoyl-phosphate synthase large subunit|6.3.5.5][rast|416.8.peg.1040||Carbamoyl-phosphate synthase large chain (EC 6.3.5.5)|6.3.5.5][proka|PROKKA_01024|carB|Carbamoyl-phosphate synthase large chain|6.3.5.5]
pgap	AYM39_05080	1070810	1071286	+	4	girp	477	0		1071286	greA	transcription elongation factor GreA		[img|Ga0113560_111030||transcription elongation factor GreA|][rast|416.8.peg.1041||Transcription elongation factor GreA|][proka|PROKKA_01025|greA|Transcription elongation factor GreA|]
pgap	AYM39_05085	1071323	1071589	-	4	girp	267	0		1071323		RNA-binding protein		[img|Ga0113560_111031||RNA-binding protein|][rast|416.8.peg.1042||FIG004454: RNA binding protein|][proka|PROKKA_01026||RNA-binding protein|]
pgap	AYM39_05090	1071640	1072257	+	4	girp	618	0		1072257		23S rRNA methyltransferase		[img|Ga0113560_111032||23S rRNA (uridine2552-2'-O)-methyltransferase|2.1.1.166][rast|416.8.peg.1043||Heat shock protein FtsJ/RrmJ @ Ribosomal RNA large subunit methyltransferase E (EC 2.1.1.-)|][proka|PROKKA_01027|rlmE|Ribosomal RNA large subunit methyltransferase E|2.1.1.166]
pgap	AYM39_05095	1072369	1074294	+	4	girp	1921.5	5.2		1074294	hflB	ATP-dependent metalloprotease		[img|Ga0113560_111033|ftsH|cell division protease FtsH|3.4.24.-][rast|416.8.peg.1044||Cell division protein FtsH (EC 3.4.24.-)|][proka|PROKKA_01028|ftsH_3|ATP-dependent zinc metalloprotease FtsH|3.4.24.-]
pgap	AYM39_05100	1074363	1075703	+	4	girp	1341	0		1075703	glmM	phosphoglucosamine mutase		[img|Ga0113560_111034||phosphoglucosamine mutase|5.4.2.10][rast|416.8.peg.1045||Phosphoglucosamine mutase (EC 5.4.2.10)|5.4.2.10][proka|PROKKA_01029|glmM_2|Phosphoglucosamine mutase|5.4.2.10]
pgap	AYM39_05105	1075758	1076504	+	4	girp	747	0		1076504		triose-phosphate isomerase		[img|Ga0113560_111035||triosephosphate isomerase (TIM)|5.3.1.1][rast|416.8.peg.1046||Triosephosphate isomerase (EC 5.3.1.1)|5.3.1.1][proka|PROKKA_01030|tpiA|Triosephosphate isomerase|5.3.1.1]
pgap	AYM39_05110	1076526	1076933	+	4	girp	408	0		1076933		preprotein translocase subunit SecG		[img|Ga0113560_111036||preprotein translocase subunit SecG|][rast|416.8.peg.1047||Preprotein translocase subunit SecG (TC 3.A.5.1.1)|][proka|PROKKA_01031|secG|Protein-export membrane protein SecG|]
pgap	AYM39_05120	1077556	1082517	+	4	girp	4962	0		1082517		damage-inducible protein		[img|Ga0113560_111038||Predicted helicase|][rast|416.8.peg.1048||FIG003033: Helicase domain protein|][proka|PROKKA_01033||type I restriction enzyme EcoKI subunit R|]
pgap	AYM39_05125	1082589	1082984	+	4	girp	396	0		1082984		DNA polymerase subunit beta		[img|Ga0113560_111039||Nucleotidyltransferase domain-containing protein|][rast|416.8.peg.1049||hypothetical protein|][proka|PROKKA_01034||Nucleotidyltransferase domain protein|]
pgap	AYM39_05130	1082974	1083396	+	4	girp	423	0		1083396		toxin-antitoxin antitoxin component		[img|Ga0113560_111040||Uncharacterized conserved protein YutE, UPF0331/DUF86 family|][rast|416.8.peg.1050||protein of unknown function DUF86|][proka|PROKKA_01035||hypothetical protein|]
pgap	AYM39_05135	1083587	1084582	-	4	girp	973.5	15		1083587		AraC family transcriptional regulator		[img|Ga0113560_111041||AraC-type DNA-binding protein|][rast|416.8.peg.1051||Transcriptional regulator, AraC family|][proka|PROKKA_01036|nphR|Transcriptional activator NphR|]
pgap	AYM39_05140	1084792	1086138	+	4	girp	1347	0		1086138		transposase		[img|Ga0113560_111042||transposase, IS5 family|][rast|416.8.peg.1052||Mobile element protein|][proka|PROKKA_01037||hypothetical protein|]
pgap	AYM39_05150	1086671	1087918	-	4	girp	789	307.1	pseudo	1086671		[PSEUDO_pgap: hypothetical protein]		[img|Ga0113560_111044||mannonate dehydratase|4.2.1.8][rast|416.8.peg.1054||hypothetical protein|][proka|PROKKA_01039||Amidohydrolase|]
pgap	AYM39_05145	1086207	1086674	+	4	girp	462.8	11.8		1086674		hypothetical protein		[img|Ga0113560_111043||hypothetical protein|][rast|416.8.peg.1053||hypothetical protein|][proka|PROKKA_01038||hypothetical protein|]
img	Ga0113560_111045	1087385	1087918	-	3	irp	518	27.7		1087385		hypothetical protein		[rast|416.8.peg.1055||hypothetical protein|][proka|PROKKA_01040||hypothetical protein|]
pgap	AYM39_05155	1088901	1090148	+	4	girp	1257.8	19.5		1090148		transposase		[img|Ga0113560_111046||Transposase (or an inactivated derivative)|][rast|416.8.peg.1057||Mobile element protein|][proka|PROKKA_01041||Transposase, Mutator family|]
pgap	AYM39_05160	1090735	1092141	-	4	girp	1407	0		1090735		ethanolamine utilization protein		[img|Ga0113560_111047||DNA polymerase-3 subunit epsilon|2.7.7.7][rast|416.8.peg.1058||DNA polymerase III epsilon subunit (EC 2.7.7.7)|2.7.7.7][proka|PROKKA_01042|cho|Excinuclease cho|3.1.25.-]
pgap	AYM39_05165	1092125	1095043	-	4	girp	2919	0		1092125		glycine dehydrogenase (aminomethyl-transferring)		[img|Ga0113560_111048||glycine dehydrogenase|1.4.4.2][rast|416.8.peg.1059||Glycine dehydrogenase [decarboxylating] (glycine cleavage system P protein) (EC 1.4.4.2)|1.4.4.2][proka|PROKKA_01043|gcvP|Glycine dehydrogenase (decarboxylating)|1.4.4.2]
pgap	AYM39_05170	1095046	1096143	-	4	girp	1083.8	28.5		1095046	gcvT	glycine cleavage system protein T		[img|Ga0113560_111049||aminomethyltransferase|2.1.2.10][rast|416.8.peg.1060||Aminomethyltransferase (glycine cleavage system T protein) (EC 2.1.2.10)|2.1.2.10][proka|PROKKA_01044|gcvT|Aminomethyltransferase|2.1.2.10]
pgap	AYM39_05175	1096155	1096853	-	4	girp	699	0		1096155		hypothetical protein		[img|Ga0113560_111050||Double zinc ribbon|][rast|416.8.peg.1061||hypothetical protein|][proka|PROKKA_01045||Double zinc ribbon|]
pgap	AYM39_05180	1097025	1097768	-	4	girp	744	0		1097025		hypothetical protein		[img|Ga0113560_111051||Putative zinc- or iron-chelating domain-containing protein|][rast|416.8.peg.1062||hypothetical protein|][proka|PROKKA_01046||Flagellin N-methylase|]
pgap	AYM39_05185	1097947	1098204	+	1	g	258	0		1098204		hypothetical protein
pgap	AYM39_05190	1098357	1099667	+	4	girp	1311	0		1099667		group II intron reverse transcriptase/maturase		[img|Ga0113560_111052||RNA-directed DNA polymerase|2.7.7.49][rast|416.8.peg.1064||Retron-type RNA-directed DNA polymerase (EC 2.7.7.49)|2.7.7.49][proka|PROKKA_01047|ltrA_1|Group II intron-encoded protein LtrA|]
pgap	AYM39_05195	1099809	1100027	+	2	gr	174	63.6		1100027		hypothetical protein		[rast|416.8.peg.1065||hypothetical protein|]
pgap	AYM39_05200	1100043	1100765	+	4	girp	723	0		1100765		methyltransferase		[img|Ga0113560_111054||Methyltransferase domain-containing protein|][rast|416.8.peg.1066||FIG025233: SAM-dependent methyltransferases|][proka|PROKKA_01048||putative S-adenosylmethionine-dependent methyltransferase/MSMEI_2290|2.1.1.-]
pgap	AYM39_05205	1100767	1101336	+	4	girp	570	0		1101336		hypothetical protein		[img|Ga0113560_111055||Protein of unknown function (DUF3261)|][rast|416.8.peg.1067||FIG035331: hypothetical protein|][proka|PROKKA_01049||hypothetical protein|]
pgap	AYM39_05210	1101317	1102498	+	4	girp	1182	0		1102498		3-oxoacyl-ACP synthase		[img|Ga0113560_111056||3-oxoacyl-[acyl-carrier-protein] synthase-1|2.3.1.41][rast|416.8.peg.1068||3-oxoacyl-[ACP] synthase (EC 2.3.1.41) FabV like|2.3.1.41][proka|PROKKA_01050|fabF_1|3-oxoacyl-[acyl-carrier-protein] synthase 2|2.3.1.179]
pgap	AYM39_05215	1102495	1102959	+	4	girp	465	0		1102959		3-hydroxylacyl-ACP dehydratase		[img|Ga0113560_111057||Predicted 3-hydroxylacyl-ACP dehydratase, HotDog domain|][rast|416.8.peg.1069||3-hydroxydecanoyl-[ACP] dehydratase (EC 4.2.1.60)|4.2.1.60][proka|PROKKA_01051||hypothetical protein|]
pgap	AYM39_05220	1102952	1103677	+	4	girp	726	0		1103677	fabG	beta-ketoacyl-ACP reductase		[img|Ga0113560_111058||3-oxoacyl-[acyl-carrier protein] reductase|1.1.1.100][rast|416.8.peg.1070||3-oxoacyl-[ACP] reductase (EC 1.1.1.100)|1.1.1.100][proka|PROKKA_01052|fabG_2|3-oxoacyl-[acyl-carrier-protein] reductase FabG|1.1.1.100]
pgap	AYM39_05225	1103671	1104894	+	4	girp	1222.5	1.7		1104894		beta-ketoacyl-ACP synthase II		[img|Ga0113560_111059||3-oxoacyl-[acyl-carrier-protein] synthase II|2.3.1.179][rast|416.8.peg.1071||FIG138576: 3-oxoacyl-[ACP] synthase (EC 2.3.1.41)|2.3.1.41][proka|PROKKA_01053|fabF_2|3-oxoacyl-[acyl-carrier-protein] synthase 2|2.3.1.179]
pgap	AYM39_05230	1104913	1105332	+	4	girp	420	0		1105332		hypothetical protein		[img|Ga0113560_111060||hypothetical protein|][rast|416.8.peg.1072||hypothetical protein|][proka|PROKKA_01054||hypothetical protein|]
pgap	AYM39_05235	1105367	1105726	+	4	girp	360	0		1105726		hypothetical protein		[img|Ga0113560_111061||hypothetical protein|][rast|416.8.peg.1073||hypothetical protein|][proka|PROKKA_01055||hypothetical protein|]
pgap	AYM39_05240	1106011	1106385	+	4	girp	375	0		1106385		hypothetical protein		[img|Ga0113560_111062||SnoaL-like domain-containing protein|][rast|416.8.peg.1074||hypothetical protein|][proka|PROKKA_01056||SnoaL-like domain protein|]
pgap	AYM39_05245	1106473	1107120	+	4	girp	648	0		1107120		glutathione S-transferase		[img|Ga0113560_111063||glutathione S-transferase|2.5.1.18][rast|416.8.peg.1075||Glutathione S-transferase (EC 2.5.1.18)|2.5.1.18][proka|PROKKA_01057|dcmA|Dichloromethane dehalogenase|4.5.1.3]
pgap	AYM39_05250	1107584	1108123	+	3	gip	672	114.3		1108123		hypothetical protein		[img|Ga0113560_111064||hypothetical protein|][proka|PROKKA_01058||hypothetical protein|]
pgap	AYM39_05255	1108459	1108992	+	3	gip	534	0		1108992		hypothetical protein		[img|Ga0113560_111065||hypothetical protein|][proka|PROKKA_01059||hypothetical protein|]
pgap	AYM39_05260	1109244	1110035	-	4	girp	792	0		1109244		nuclease		[img|Ga0113560_111066||Topoisomerase DNA binding C4 zinc finger|][rast|416.8.peg.1076||hypothetical protein|][proka|PROKKA_01060||Nuclease-related domain protein|]
pgap	AYM39_05265	1110595	1111236	+	4	girp	666	27.7		1111236		hypothetical protein		[img|Ga0113560_111067||hypothetical protein|][rast|416.8.peg.1077||hypothetical protein|][proka|PROKKA_01061||hypothetical protein|]
pgap	AYM39_05270	1111277	1112242	+	4	girp	898.5	45	pseudo	1112242		[PSEUDO_pgap: phosphatase]		[img|Ga0113560_111068||hypothetical protein|][rast|416.8.peg.1079||phosphatase-like|][proka|PROKKA_01062||hypothetical protein|]
img	Ga0113560_111069	1112707	1112880	+	3	irp	174	0		1112880		hypothetical protein		[rast|416.8.peg.1081||hypothetical protein|][proka|PROKKA_01063||hypothetical protein|]
pgap	AYM39_05275	1113330	1115612	+	4	girp	2283	0		1115612		hypothetical protein		[img|Ga0113560_111070||hypothetical protein|][rast|416.8.peg.1082||Histidinol phosphatase and related hydrolases of the PHP family|][proka|PROKKA_01064||hypothetical protein|]
pgap	AYM39_05280	1115784	1116395	+	4	girp	612	0		1116395		hypothetical protein		[img|Ga0113560_111071||VPLPA-CTERM protein sorting domain-containing protein|][rast|416.8.peg.1084||hypothetical protein|][proka|PROKKA_01065||hypothetical protein|]
pgap	AYM39_05285	1116525	1117391	+	4	girp	845.2	43.5		1117391		hypothetical protein		[img|Ga0113560_111072||PPIC-type PPIASE domain-containing protein|][rast|416.8.peg.1085||hypothetical protein|][proka|PROKKA_01066||hypothetical protein|]
pgap	AYM39_05290	1117388	1118338	+	4	girp	951	0		1118338		hypothetical protein		[img|Ga0113560_111073||HupE / UreJ protein|][rast|416.8.peg.1086||membrane protein, putative|][proka|PROKKA_01067||hypothetical protein|]
pgap	AYM39_05295	1118367	1118990	+	4	girp	624	0		1118990		hypothetical protein		[img|Ga0113560_111074||conserved hypothetical protein|][rast|416.8.peg.1087||hypothetical protein|][proka|PROKKA_01068||hypothetical protein|]
pgap	AYM39_05300	1119159	1121672	+	4	girp	2640	84		1121672		hypothetical protein		[img|Ga0113560_111075||spermidine synthase|2.5.1.16][rast|416.8.peg.1088||Spermidine synthase (EC 2.5.1.16)|2.5.1.16][proka|PROKKA_01069|speE_1|Spermidine synthase|2.5.1.16]
pgap	AYM39_05305	1121984	1122562	+	1	g	579	0	pseudo	1122562		[PSEUDO_pgap: alkaline phosphatase]
img	Ga0113560_111076	1121984	1122844	+	3	irp	861	0		1122844		membrane protein DedA, SNARE-associated domain		[rast|416.8.peg.1089||DedA protein|][proka|PROKKA_01070||hypothetical protein|]
pgap	AYM39_05310	1123119	1123319	-	4	girp	223.5	26		1123119		hypothetical protein		[img|Ga0113560_111077||KTSC domain-containing protein|][rast|416.8.peg.1090||hypothetical protein|][proka|PROKKA_01071||hypothetical protein|]
pgap	AYM39_05315	1123487	1124182	+	4	girp	717.8	43.5		1124182		short-chain dehydrogenase		[img|Ga0113560_111078||Short-chain dehydrogenase|][rast|416.8.peg.1091||Short chain dehydrogenase|][proka|PROKKA_01072|csgA|C-factor|]
pgap	AYM39_05320	1124361	1126403	+	4	girp	2043	0		1126403		hypothetical protein		[img|Ga0113560_111079||iron complex outermembrane recepter protein|][rast|416.8.peg.1093||TonB-dependent receptor; Outer membrane receptor for ferrienterochelin and colicins|][proka|PROKKA_01073|cirA_3|Colicin I receptor precursor|]
pgap	AYM39_05325	1126691	1127323	+	4	girp	633	0		1127323		carbonic anhydrase		[img|Ga0113560_111080||carbonic anhydrase|4.2.1.1][rast|416.8.peg.1095||Carbonic anhydrase (EC 4.2.1.1)|4.2.1.1][proka|PROKKA_01074|can_2|Carbonic anhydrase 2|4.2.1.1]
pgap	AYM39_05330	1127353	1128951	+	4	girp	1599	0		1128951		hypothetical protein		[img|Ga0113560_111081||Sulfate permease, MFS superfamily|][rast|416.8.peg.1096||Sulfate permease|][proka|PROKKA_01075|bicA|Bicarbonate transporter BicA|]
pgap	AYM39_05335	1128995	1129894	-	4	girp	900	0		1128995		LysR family transcriptional regulator		[img|Ga0113560_111082||DNA-binding transcriptional regulator, LysR family|][rast|416.8.peg.1097||Transcriptional regulator, LysR family|][proka|PROKKA_01076|dmlR_1|HTH-type transcriptional regulator DmlR|]
pgap	AYM39_05340	1129997	1130596	+	4	girp	600	0		1130596		FMN-dependent NADH-azoreductase		[img|Ga0113560_111083||FMN-dependent NADH-azoreductase|1.7.-][rast|416.8.peg.1098||FMN-dependent NADH-azoreductase|][proka|PROKKA_01077|azoR|FMN-dependent NADH-azoreductase|1.7.-.-]
pgap	AYM39_05345	1130620	1131504	+	4	girp	885	0		1131504		pirin		[img|Ga0113560_111084||hypothetical protein|][rast|416.8.peg.1099||Pirin|][proka|PROKKA_01078|yhhW|Quercetin 2,3-dioxygenase|1.13.11.24]
pgap	AYM39_05350	1132141	1134132	+	4	girp	1992	0		1134132		hypothetical protein		[img|Ga0113560_111085||iron complex outermembrane recepter protein|][rast|416.8.peg.1101||TonB-dependent receptor; Outer membrane receptor for ferrienterochelin and colicins|][proka|PROKKA_01079|cirA_4|Colicin I receptor precursor|]
pgap	AYM39_05355	1134122	1135147	+	4	girp	1026	0		1135147		hypothetical protein		[img|Ga0113560_111086||putative ABC transport system substrate-binding protein|][rast|416.8.peg.1102||hypothetical protein|][proka|PROKKA_01080||ABC transporter substrate binding protein|]
pgap	AYM39_05360	1135159	1137303	+	4	girp	2145	0		1137303		hypothetical protein		[img|Ga0113560_111087||diguanylate cyclase (GGDEF) domain-containing protein|][rast|416.8.peg.1103||diguanylate cyclase/phosphodiesterase (GGDEF & EAL domains) with PAS/PAC sensor(s)|][proka|PROKKA_01081|gmr_8|Cyclic di-GMP phosphodiesterase Gmr|3.1.4.52]
pgap	AYM39_05370	1138350	1138979	-	4	girp	630	0		1138350		pyridoxamine 5-phosphate oxidase		[img|Ga0113560_111089||hypothetical protein|][rast|416.8.peg.1105||Flavodoxin reductases (ferredoxin-NADPH reductases) family 1|][proka|PROKKA_01083||Pyridoxamine 5'-phosphate oxidase|]
pgap	AYM39_05365	1137406	1138362	+	4	girp	957	0		1138362		hypothetical protein		[img|Ga0113560_111088||chitosanase of glycosyl hydrolase group 75|][rast|416.8.peg.1104||hypothetical protein|][proka|PROKKA_01082||Fungal chitosanase|]
pgap	AYM39_05375	1139677	1139931	+	4	girp	255	0		1139931		plasmid stabilization protein		[img|Ga0113560_111090||Plasmid stability protein|][rast|416.8.peg.1106||VapB protein (antitoxin to VapC)|][proka|PROKKA_01084|fitA|Antitoxin FitA|]
pgap	AYM39_05380	1139928	1140344	+	4	girp	417	0		1140344		plasmid stability protein StbB		[img|Ga0113560_111091||hypothetical protein|][rast|416.8.peg.1107||VapC toxin protein|][proka|PROKKA_01085|fitB_2|Toxin FitB|3.1.-.-]
pgap	AYM39_05385	1140910	1141941	-	4	girp	1032	0		1140910		transposase		[img|Ga0113560_111092||Transposase and inactivated derivatives, IS5 family|][rast|416.8.peg.1108||Mobile element protein|][proka|PROKKA_01086||Transposase DDE domain protein|]
pgap	AYM39_05390	1142077	1142778	+	2	gr	777	106.1		1142778		hypothetical protein		[rast|416.8.peg.1109||hypothetical protein|]
pgap	AYM39_05395	1142794	1143546	+	3	gip	753	0		1143546		hypothetical protein		[img|Ga0113560_111093||hypothetical protein|][proka|PROKKA_01087||hypothetical protein|]
img	Ga0113560_111094	1143788	1144276	-	3	irp	489	0		1143788		Protein of unknown function (DUF2442)		[rast|416.8.peg.1111||hypothetical protein|][proka|PROKKA_01088||hypothetical protein|]
pgap	AYM39_05400	1143854	1144294	-	1	g	441	0	pseudo	1143854		[PSEUDO_pgap: hypothetical protein]
pgap	AYM39_05405	1144691	1144942	+	4	girp	224.2	55.5		1144942		prevent-host-death protein		[img|Ga0113560_111095||prevent-host-death family protein|][rast|416.8.peg.1113||Prevent-host-death family protein|][proka|PROKKA_01089||Phd_YefM|]
pgap	AYM39_05410	1144945	1145370	+	4	girp	427.5	1.7		1145370		twitching motility protein PilT		[img|Ga0113560_111096||hypothetical protein|][rast|416.8.peg.1114||VapC toxin protein|][proka|PROKKA_01090|fitB_3|Toxin FitB|3.1.-.-]
pgap	AYM39_05415	1146255	1146683	-	4	girp	429	0		1146255		hypothetical protein		[img|Ga0113560_111097||regulator of nucleoside diphosphate kinase|][rast|416.8.peg.1116||Regulator of nucleoside diphosphate kinase|][proka|PROKKA_01091|rnk|Regulator of nucleoside diphosphate kinase|]
pgap	AYM39_05420	1147185	1148012	+	4	girp	828	0		1148012		hypothetical protein		[img|Ga0113560_111098||Spondin_N|][rast|416.8.peg.1117||hypothetical protein|][proka|PROKKA_01092||Spondin_N|]
pgap	AYM39_05425	1148026	1148340	+	1	g	315	0		1148340		hypothetical protein
pgap	AYM39_05430	1148460	1149107	-	4	girp	648	0		1148460		hypothetical protein		[img|Ga0113560_111099||hypothetical protein|][rast|416.8.peg.1118||Protein containing plastocyanin/azurin family domain|][proka|PROKKA_01093||hypothetical protein|]
pgap	AYM39_05435	1149077	1150312	-	4	girp	1233	6		1149077		hypothetical protein		[img|Ga0113560_111100||hypothetical protein|][rast|416.8.peg.1119||hypothetical protein|][proka|PROKKA_01094||hypothetical protein|]
pgap	AYM39_05440	1150396	1152153	-	4	girp	1758	0		1150396		hypothetical protein		[img|Ga0113560_111101||HAMP domain-containing protein|][rast|416.8.peg.1120||sensor histidine kinase|][proka|PROKKA_01095|phoR_2|Alkaline phosphatase synthesis sensor protein PhoR|2.7.13.3]
pgap	AYM39_05445	1152150	1152872	-	4	girp	723	0		1152150		two-component system response regulator		[img|Ga0113560_111102||DNA-binding response regulator, OmpR family, contains REC and winged-helix (wHTH) domain|][rast|416.8.peg.1121||Phosphate regulon transcriptional regulatory protein PhoB (SphR)|][proka|PROKKA_01096|regX3|Sensory transduction protein regX3|]
pgap	AYM39_05450	1152995	1153906	-	4	girp	907.5	9		1152995		hypothetical protein		[img|Ga0113560_111103||Permease of the drug/metabolite transporter (DMT) superfamily|][rast|416.8.peg.1122||Permease of the drug/metabolite transporter (DMT) superfamily|][proka|PROKKA_01097||EamA-like transporter family protein|]
pgap	AYM39_05455	1154097	1155506	+	4	girp	1410	0		1155506		GntR family transcriptional regulator		[img|Ga0113560_111104||DNA-binding transcriptional regulator, MocR family, contains an aminotransferase domain|][rast|416.8.peg.1123||Transcriptional regulator, GntR family domain / Aspartate aminotransferase (EC 2.6.1.1)|2.6.1.1][proka|PROKKA_01098|yjiR_1|putative HTH-type transcriptional regulator YjiR|]
pgap	AYM39_05460	1155534	1155719	+	2	gr	186	0		1155719		hypothetical protein		[rast|416.8.peg.1124||hypothetical protein|]
pgap	AYM39_05465	1155808	1158207	-	4	girp	2463	126		1155808		ATP-dependent protease		[img|Ga0113560_111105||lon-related putative ATP-dependent protease|][rast|416.8.peg.1125||ATP-dependent protease La (EC 3.4.21.53) Type II|3.4.21.53][proka|PROKKA_01099|lon_2|Lon protease|3.4.21.53]
pgap	AYM39_05470	1158995	1159933	+	4	girp	939	0		1159933		UDP-N-acetyl-D-glucosamine dehydrogenase		[img|Ga0113560_111106||Predicted dehydrogenase|][rast|416.8.peg.1127||Oxidoreductase, Gfo/Idh/MocA family|][proka|PROKKA_01100|ycjS|putative oxidoreductase YcjS|1.-.-.-]
pgap	AYM39_05475	1159946	1161043	+	4	girp	1098	0		1161043		erythromycin biosynthesis sensory transduction protein eryC1		[img|Ga0113560_111107||dTDP-4-amino-4,6-dideoxygalactose transaminase|][rast|416.8.peg.1128||Aminotransferase, DegT/DnrJ/EryC1/StrS family|][proka|PROKKA_01101|wbpE|UDP-2-acetamido-2-deoxy-3-oxo-D-glucuronate aminotransferase|2.6.1.98]
pgap	AYM39_05480	1161095	1162249	+	4	girp	1155	0		1162249		lipid-A-disaccharide synthase		[img|Ga0113560_111108||lipid-A-disaccharide synthase|2.4.1.182][rast|416.8.peg.1129||Lipid-A-disaccharide synthase (EC 2.4.1.182)|2.4.1.182][proka|PROKKA_01102|lpxB|Lipid-A-disaccharide synthase|2.4.1.182]
pgap	AYM39_05485	1162259	1163371	-	4	girp	1113	0		1162259	tgt	tRNA-guanine(34) transglycosylase		[img|Ga0113560_111109||queuine tRNA-ribosyltransferase|2.4.2.29][rast|416.8.peg.1130||tRNA-guanine transglycosylase (EC 2.4.2.29)|2.4.2.29][proka|PROKKA_01103|tgt|Queuine tRNA-ribosyltransferase|2.4.2.29]
pgap	AYM39_05490	1163654	1164754	+	4	girp	1101	0		1164754		transcriptional regulator		[img|Ga0113560_111110||putative two-component system response regulator|][rast|416.8.peg.1131||Response regulator|][proka|PROKKA_01104|rpfG_1|Cyclic di-GMP phosphodiesterase response regulator RpfG|3.1.4.52]
pgap	AYM39_05495	1164783	1165697	+	4	girp	946.5	33		1165697		hypothetical protein		[img|Ga0113560_111111||Histidine kinase-like ATPase domain-containing protein|][rast|416.8.peg.1132||Phosphate regulon transcriptional regulatory protein PhoB (SphR)|][proka|PROKKA_01105|cheY_2|Chemotaxis protein CheY|]
pgap	AYM39_05500	1165910	1170085	+	4	girp	4195.5	22.5		1170085		hypothetical protein		[img|Ga0113560_111112||PAS domain S-box-containing protein|][rast|416.8.peg.1134||diguanylate cyclase/phosphodiesterase (GGDEF & EAL domains) with PAS/PAC sensor(s)|][proka|PROKKA_01106|rpfC_2|Sensory/regulatory protein RpfC|2.7.13.3]
pgap	AYM39_05505	1170216	1170683	-	4	girp	468	0		1170216		bacterioferritin		[img|Ga0113560_111113||bacterioferritin|1.16.3.1][rast|416.8.peg.1135||Bacterioferritin|][proka|PROKKA_01107|bfr_1|Bacterioferritin|1.16.3.1]
pgap	AYM39_05510	1170786	1171769	-	4	girp	974.2	19.5		1170786		cobalamin biosynthesis protein P47K		[img|Ga0113560_111114||GTPase, G3E family|][rast|416.8.peg.1136||Putative metal chaperone, involved in Zn homeostasis, GTPase of COG0523 family|][proka|PROKKA_01108|yjiA|putative GTP-binding protein YjiA|]
pgap	AYM39_05515	1172077	1172742	-	4	girp	666	0		1172077		hypothetical protein		[img|Ga0113560_111116||CRP/FNR family transcriptional regulator, anaerobic regulatory protein|][rast|416.8.peg.1138||transcriptional regulator, Crp/Fnr family|][proka|PROKKA_01110|crp_1|cAMP receptor protein|]
img	Ga0113560_111115	1171907	1172080	+	3	irp	174	0		1172080		hypothetical protein		[rast|416.8.peg.1137||hypothetical protein|][proka|PROKKA_01109||hypothetical protein|]
pgap	AYM39_05520	1172925	1173821	+	4	girp	897	0		1173821		hypothetical protein		[img|Ga0113560_111117||hypothetical protein|][rast|416.8.peg.1139||Ni,Fe-hydrogenase I cytochrome b subunit|][proka|PROKKA_01111||hypothetical protein|]
pgap	AYM39_05525	1174042	1174560	+	4	girp	519	0		1174560		transposase		[img|Ga0113560_111118||putative transposase|][rast|416.8.peg.1140||Transposase and inactivated derivatives|][proka|PROKKA_01112||Transposase IS200 like protein|]
pgap	AYM39_05530	1174614	1175408	+	4	girp	795	0		1175408		class D beta-lactamase		[img|Ga0113560_111119||beta-lactamase class D|3.5.2.6][rast|416.8.peg.1141||Beta-lactamase (EC 3.5.2.6)|3.5.2.6][proka|PROKKA_01113|bla|Beta-lactamase OXA-10 precursor|3.5.2.6]
pgap	AYM39_05535	1175416	1175682	-	2	gr	204	89.1		1175416		hypothetical protein		[rast|416.8.peg.1142||hypothetical protein|]
pgap	AYM39_05540	1175681	1178746	+	4	girp	3064.5	3		1178746		hypothetical protein		[img|Ga0113560_111120||Uncharacterized conserved protein HemY, contains two TPR repeats|][rast|416.8.peg.1143||Transglutaminase-like enzymes, putative cysteine proteases|][proka|PROKKA_01114|acsC|Cellulose synthase operon protein C precursor|]
pgap	AYM39_05545	1179049	1179678	-	4	girp	618.8	7.5		1179049		hypothetical protein		[img|Ga0113560_111121||diguanylate cyclase (GGDEF) domain-containing protein|][rast|416.8.peg.1144||diguanylate cyclase/phosphodiesterase (GGDEF & EAL domains) with PAS/PAC sensor(s)|][proka|PROKKA_01115|gmr_9|Cyclic di-GMP phosphodiesterase Gmr|3.1.4.52]
pgap	AYM39_05550	1179660	1180508	-	4	girp	849	0		1179660		hypothetical protein		[img|Ga0113560_111122||PAS domain S-box-containing protein/hemerythrin-like metal-binding domain protein|][rast|416.8.peg.1145||diguanylate cyclase/phosphodiesterase (GGDEF & EAL domains) with PAS/PAC sensor(s)|][proka|PROKKA_01116||hypothetical protein|]
pgap	AYM39_05555	1180795	1181301	+	4	girp	614.2	79.8		1181301		hypothetical protein		[img|Ga0113560_111123||type I restriction enzyme, S subunit/type I restriction enzyme M protein|2.1.1.72; 3.1.21.3][rast|416.8.peg.1146||Type I restriction-modification system, specificity subunit S (EC 3.1.21.3)|3.1.21.3][proka|PROKKA_01117||hypothetical protein|]
pgap	AYM39_05560	1181595	1181906	+	4	girp	312	0		1181906		hypothetical protein		[img|Ga0113560_111124||hypothetical protein|][rast|416.8.peg.1147||hypothetical protein|][proka|PROKKA_01118||hypothetical protein|]
img	Ga0113560_111125	1181947	1182069	-	3	irp	123	0		1181947		iron complex outermembrane recepter protein		[rast|416.8.peg.1148||Zinc-regulated outer membrane receptor|][proka|PROKKA_01119||hypothetical protein|]
pgap	AYM39_05565	1182212	1184242	-	4	girp	2031	0		1182212		TonB-dependent receptor		[img|Ga0113560_111126||iron complex outermembrane recepter protein|][rast|416.8.peg.1149||Zinc-regulated outer membrane receptor|][proka|PROKKA_01120||putative TonB-dependent receptor precursor|]
pgap	AYM39_05570	1184335	1185528	-	4	girp	1194	0		1184335		acetate kinase		[img|Ga0113560_111127||acetate kinase|2.7.2.1][rast|416.8.peg.1150||Acetate kinase (EC 2.7.2.1)|2.7.2.1][proka|PROKKA_01121|ackA|Acetate kinase|2.7.2.1]
pgap	AYM39_05575	1185525	1186034	-	4	girp	530.2	13.5		1185525		hypothetical protein		[img|Ga0113560_111128||Protein of unknown function (DUF2380)|][rast|416.8.peg.1151||Pyruvate/2-oxoglutarate dehydrogenase complex, dihydrolipoamide dehydrogenase (E3) component, and related enzymes|][proka|PROKKA_01122||hypothetical protein|]
pgap	AYM39_05580	1186052	1188187	-	4	girp	2136	0		1186052		phosphate acetyltransferase		[img|Ga0113560_111129||phosphate acetyltransferase|2.3.1.8][rast|416.8.peg.1152||Phosphate acetyltransferase (EC 2.3.1.8)|2.3.1.8][proka|PROKKA_01123|pta|Phosphate acetyltransferase|2.3.1.8]
pgap	AYM39_05585	1188401	1189045	+	4	girp	645	0		1189045		forkhead-associated protein		[img|Ga0113560_111130||Inner membrane component of T3SS domain-containing protein|][rast|416.8.peg.1153||hypothetical protein|][proka|PROKKA_01124||FHA domain protein|]
pgap	AYM39_05590	1189050	1189424	+	4	girp	375	0		1189424		pilus assembly protein PilZ		[img|Ga0113560_111131||PilZ domain-containing protein|][rast|416.8.peg.1154||hypothetical protein|][proka|PROKKA_01125||Cyclic diguanosine monophosphate-binding protein|]
pgap	AYM39_05595	1189447	1189929	-	4	girp	483	0		1189447		alkyl hydroperoxide reductase		[img|Ga0113560_111132||Thiol-disulfide isomerase or thioredoxin|][rast|416.8.peg.1155||Membrane protein, suppressor for copper-sensitivity ScsD|][proka|PROKKA_01126||Soluble secreted antigen MPT53 precursor|]
pgap	AYM39_05600	1189929	1190657	-	4	girp	741.8	20.3		1189929		metal-dependent hydrolase		[img|Ga0113560_111133||hypothetical protein|][rast|416.8.peg.1156||Zinc metalloprotease (EC 3.4.24.-)|][proka|PROKKA_01127||hypothetical protein|]
pgap	AYM39_05605	1190645	1191244	-	4	girp	654	36		1190645		sulfate adenylyltransferase		[img|Ga0113560_111134||transglutaminase-like cysteine proteinase BTLCP|][rast|416.8.peg.1157||FIGfam010717|][proka|PROKKA_01128||hypothetical protein|]
pgap	AYM39_05610	1191303	1193207	-	4	girp	1905	0		1191303		signal protein		[img|Ga0113560_111135||EAL domain, c-di-GMP-specific phosphodiesterase class I (or its enzymatically inactive variant)|][rast|416.8.peg.1158||GGDEF and EAL domain proteins|][proka|PROKKA_01129|cph2_2|Phytochrome-like protein cph2|]
pgap	AYM39_05615	1193213	1193605	-	4	girp	393	0		1193213		globin		[img|Ga0113560_111136||hemoglobin|][rast|416.8.peg.1159||Hemoglobin-like protein HbO|][proka|PROKKA_01130|yjbI|Group 2 truncated hemoglobin YjbI|]
pgap	AYM39_05620	1193732	1194400	+	4	girp	669	0		1194400		hypothetical protein		[img|Ga0113560_111137||modulator of FtsH protease|][rast|416.8.peg.1160||Putative TEGT family carrier/transport protein|][proka|PROKKA_01131|yccA|Modulator of FtsH protease YccA|]
pgap	AYM39_05625	1194505	1195104	+	4	girp	600	0		1195104		hypothetical protein		[img|Ga0113560_111138||aspartyl protease family protein|][rast|416.8.peg.1161||hypothetical protein|][proka|PROKKA_01132||hypothetical protein|]
pgap	AYM39_05630	1195638	1196036	-	1	g	399	0		1195638		hypothetical protein
pgap	AYM39_05635	1196560	1197204	-	4	girp	645	0		1196560		hypothetical protein		[img|Ga0113560_111139||hypothetical protein|][rast|416.8.peg.1162||Putative esterase, FIGfam005057|][proka|PROKKA_01133||esterase YqiA|]
pgap	AYM39_05640	1197208	1198068	-	4	girp	861	0		1197208		epimerase		[img|Ga0113560_111140||D-psicose/D-tagatose/L-ribulose 3-epimerase|5.1.3.31; 5.1.3.30][rast|416.8.peg.1163||D-tagatose 3-epimerase (EC 5.3.1.-)|][proka|PROKKA_01134||D-tagatose 3-epimerase|5.3.1.-]
pgap	AYM39_05645	1198116	1198670	-	4	girp	555	0		1198116		ribosomal-protein-alanine acetyltransferase		[img|Ga0113560_111141||ribosomal-protein-alanine N-acetyltransferase|2.3.1.128][rast|416.8.peg.1164||Ribosomal-protein-S18p-alanine acetyltransferase (EC 2.3.1.-)|][proka|PROKKA_01135||ribosomal-protein-alanine N-acetyltransferase|]
pgap	AYM39_05650	1198676	1199545	-	4	girp	870	0		1198676		DNA polymerase		[img|Ga0113560_111142||DNA polymerase|2.7.7.7][rast|416.8.peg.1165||Uracil-DNA glycosylase, family 4|][proka|PROKKA_01136||Uracil DNA glycosylase superfamily protein|]
pgap	AYM39_05655	1199554	1201098	-	4	girp	1545	0		1199554		2-isopropylmalate synthase		[img|Ga0113560_111143|leuA|2-isopropylmalate synthase|2.3.3.13][rast|416.8.peg.1166||2-isopropylmalate synthase (EC 2.3.3.13)|2.3.3.13][proka|PROKKA_01137|leuA_2|2-isopropylmalate synthase|2.3.3.13]
pgap	AYM39_05660	1201725	1201934	+	4	girp	210	0		1201934		hypothetical protein		[img|Ga0113560_111144||hypothetical protein|][rast|416.8.peg.1168||hypothetical protein|][proka|PROKKA_01138||hypothetical protein|]
pgap	AYM39_05665	1201950	1202516	-	4	girp	567	0		1201950		elongation factor P-like protein YeiP		[img|Ga0113560_111145|efp|elongation factor P|][rast|416.8.peg.1169||Translation elongation factor P-related protein|][proka|PROKKA_01139|yeiP|Elongation factor P-like protein|]
pgap	AYM39_05670	1202520	1203239	-	4	girp	720	0		1202520		arginyl-tRNA--protein transferase		[img|Ga0113560_111146||arginine-tRNA-protein transferase|2.3.2.8][rast|416.8.peg.1170||Arginine-tRNA-protein transferase (EC 2.3.2.8)|2.3.2.8][proka|PROKKA_01140||arginyl-tRNA-protein transferase|]
pgap	AYM39_05675	1203239	1203928	-	4	girp	690	0		1203239		leucyl/phenylalanyl-tRNA--protein transferase		[img|Ga0113560_111147||leucyl/phenylalanyl-tRNA--protein transferase|2.3.2.6][rast|416.8.peg.1171||Leucyl/phenylalanyl-tRNA--protein transferase (EC 2.3.2.6)|2.3.2.6][proka|PROKKA_01141|aat|Leucyl/phenylalanyl-tRNA--protein transferase|2.3.2.6]
pgap	AYM39_05680	1204013	1204693	-	4	girp	717	24		1204013		PhoB family transcriptional regulator		[img|Ga0113560_111148||DNA-binding response regulator, OmpR family, contains REC and winged-helix (wHTH) domain|][rast|416.8.peg.1172||Phosphate regulon transcriptional regulatory protein PhoB (SphR)|][proka|PROKKA_01142|mprA|Response regulator MprA|]
pgap	AYM39_05685	1204754	1206334	-	4	girp	1581	0		1204754		histidine kinase		[img|Ga0113560_111149||HAMP domain-containing protein|][rast|416.8.peg.1173||Phosphate regulon sensor protein PhoR (SphS) (EC 2.7.13.3)|2.7.13.3][proka|PROKKA_01143|baeS|Signal transduction histidine-protein kinase BaeS|2.7.13.3]
pgap	AYM39_05690	1206340	1206915	-	4	girp	576	0		1206340		hypothetical protein		[img|Ga0113560_111150||hypothetical protein|][rast|416.8.peg.1174||hypothetical protein|][proka|PROKKA_01144||hypothetical protein|]
pgap	AYM39_05695	1206923	1208383	-	4	girp	1461	0		1206923		histidine kinase		[img|Ga0113560_111151||two-component system, NtrC family, sensor histidine kinase GlrK|2.7.13.3][rast|416.8.peg.1175||Phosphate regulon sensor protein PhoR (SphS) (EC 2.7.13.3)|2.7.13.3][proka|PROKKA_01145|glrK|Sensor histidine kinase GlrK|2.7.13.3]
pgap	AYM39_05700	1208751	1212446	+	4	girp	3795.8	76		1212446		hypothetical protein		[img|Ga0113560_111152||hypothetical protein|][rast|416.8.peg.1176||hypothetical protein|][proka|PROKKA_01146||hypothetical protein|]
pgap	AYM39_05705	1212515	1214200	-	4	girp	1700.2	28.5		1212515		NUDIX hydrolase		[img|Ga0113560_111153||hypothetical protein|][rast|416.8.peg.1177||hypothetical protein|][proka|PROKKA_01147||hypothetical protein|]
pgap	AYM39_05710	1214393	1214794	-	4	girp	402	0		1214393		twitching motility protein PilT		[img|Ga0113560_111154||tRNA(fMet)-specific endonuclease VapC|3.1.-][rast|416.8.peg.1178||VapC toxin protein|][proka|PROKKA_01148|vapC_1|tRNA(fMet)-specific endonuclease VapC|3.1.-.-]
pgap	AYM39_05715	1214791	1215027	-	4	girp	237	0		1214791		hypothetical protein		[img|Ga0113560_111155||hypothetical protein|][rast|416.8.peg.1179||hypothetical protein|][proka|PROKKA_01149||hypothetical protein|]
pgap	AYM39_05720	1215039	1215266	-	4	girp	228	0		1215039		CopG family transcriptional regulator		[img|Ga0113560_111156||hypothetical protein|][rast|416.8.peg.1180||hypothetical protein|][proka|PROKKA_01150||hypothetical protein|]
pgap	AYM39_05725	1215263	1216666	-	4	girp	1404	0		1215263		hypothetical protein		[img|Ga0113560_111157||hypothetical protein|][rast|416.8.peg.1181||hypothetical protein|][proka|PROKKA_01151||hypothetical protein|]
pgap	AYM39_05730	1216678	1218330	-	4	girp	1635	12		1216678		hypothetical protein		[img|Ga0113560_111158||hypothetical protein|][rast|416.8.peg.1182||hypothetical protein|][proka|PROKKA_01152||Sel1 repeat protein|]
pgap	AYM39_05735	1218350	1218913	-	4	girp	564	0		1218350		hypothetical protein		[img|Ga0113560_111159||hypothetical protein|][rast|416.8.peg.1183||hypothetical protein|][proka|PROKKA_01153||hypothetical protein|]
pgap	AYM39_05740	1219187	1219936	-	4	girp	750	0		1219187		hypothetical protein		[img|Ga0113560_111160||hypothetical protein|][rast|416.8.peg.1184||hypothetical protein|][proka|PROKKA_01154||hypothetical protein|]
pgap	AYM39_05745	1220311	1221732	+	4	girp	1422	0		1221732		undecaprenyl-phosphate glucose phosphotransferase		[img|Ga0113560_111161||putative colanic acid biosysnthesis UDP-glucose lipid carrier transferase|][rast|416.8.peg.1185||FIG071646: Sugar transferase|][proka|PROKKA_01155|gumD|UDP-glucose:undecaprenyl-phosphate glucose-1-phosphate transferase|2.7.8.31]
pgap	AYM39_05750	1221745	1222848	+	4	girp	1104	0		1222848		sugar transporter		[img|Ga0113560_111162||polysaccharide export outer membrane protein|][rast|416.8.peg.1186||Polysaccharide export lipoprotein Wza|][proka|PROKKA_01156||Polysaccharide biosynthesis/export protein|]
pgap	AYM39_05755	1222959	1225310	+	4	girp	2352	0		1225310		capsular biosynthesis protein		[img|Ga0113560_111163||tyrosine-protein kinase Etk/Wzc|2.7.10.-][rast|416.8.peg.1187||Tyrosine-protein kinase Wzc (EC 2.7.10.2)|2.7.10.2][proka|PROKKA_01157|ptk|Tyrosine-protein kinase ptk|2.7.10.-]
pgap	AYM39_05760	1225318	1226559	+	4	girp	1242	0		1226559		hypothetical protein		[img|Ga0113560_111164||O-Antigen ligase|][rast|416.8.peg.1188||hypothetical protein|][proka|PROKKA_01158||hypothetical protein|]
pgap	AYM39_05765	1226552	1227889	+	4	girp	1338	0		1227889		polysaccharide biosynthesis protein		[img|Ga0113560_111165||Membrane protein involved in the export of O-antigen and teichoic acid|][rast|416.8.peg.1189||Polysaccharide biosynthesis protein|][proka|PROKKA_01159||Polysaccharide biosynthesis protein|]
pgap	AYM39_05770	1227946	1228899	+	4	girp	963.8	7.1		1228899		methyltransferase type 11		[img|Ga0113560_111166||Methyltransferase domain-containing protein|][rast|416.8.peg.1190||conserved domain protein|][proka|PROKKA_01160||bifunctional 3-demethylubiquinone-9 3-methyltransferase/ 2-octaprenyl-6-hydroxy phenol methylase|]
pgap	AYM39_05775	1228907	1229698	+	4	girp	792	0		1229698		glycosyl transferase family 2		[img|Ga0113560_111167||Glycosyltransferase involved in cell wall bisynthesis|][rast|416.8.peg.1191||glycosyl transferase family 2|][proka|PROKKA_01161||Glycosyl transferase family 2|]
pgap	AYM39_05780	1229695	1230561	+	4	girp	867	0		1230561		glycosyl transferase family 2		[img|Ga0113560_111168||Glycosyltransferase, GT2 family|][rast|416.8.peg.1192||Glycosyltransferase|][proka|PROKKA_01162|spsA|Spore coat polysaccharide biosynthesis protein SpsA|]
pgap	AYM39_05785	1230577	1231773	+	4	girp	1197	0		1231773		glycosyl transferase family 1		[img|Ga0113560_111169||Glycosyltransferase involved in cell wall bisynthesis|][rast|416.8.peg.1193||hypothetical protein|][proka|PROKKA_01163||Glycosyl transferases group 1|]
pgap	AYM39_05790	1231770	1232720	+	4	girp	951	0		1232720		rhamnosyltransferase		[img|Ga0113560_111170||rhamnosyltransferase|2.4.1.-][rast|416.8.peg.1194||O antigen biosynthesis rhamnosyltransferase rfbN (EC 2.4.1.-)|][proka|PROKKA_01164||N-glycosyltransferase|]
pgap	AYM39_05795	1233043	1233774	+	4	girp	732	0		1233774		exosortase		[img|Ga0113560_111171||N-acyl amino acid synthase, PEP-CTERM/exosortase system-associated|][rast|416.8.peg.1195||hypothetical protein|][proka|PROKKA_01165||Autoinducer synthetase|]
pgap	AYM39_05800	1234055	1236106	-	4	girp	2119.5	45		1234055		diguanylate cyclase		[img|Ga0113560_111172||PAS domain S-box-containing protein/diguanylate cyclase (GGDEF) domain-containing protein|][rast|416.8.peg.1196||diguanylate cyclase/phosphodiesterase (GGDEF & EAL domains) with PAS/PAC sensor(s)|][proka|PROKKA_01166|cph2_3|Phytochrome-like protein cph2|]
pgap	AYM39_05805	1236545	1238566	+	4	girp	2022	0		1238566		hypothetical protein		[img|Ga0113560_111173||hypothetical protein|][rast|416.8.peg.1197||Methyl-accepting chemotaxis protein|][proka|PROKKA_01167||hypothetical protein|]
pgap	AYM39_05810	1238921	1239139	-	4	girp	219	0		1238921		hypothetical protein		[img|Ga0113560_111174||hypothetical protein|][rast|416.8.peg.1198||hypothetical protein|][proka|PROKKA_01168||hypothetical protein|]
pgap	AYM39_05815	1239189	1239392	-	4	girp	192	24		1239189		hypothetical protein		[img|Ga0113560_111175||hypothetical protein|][rast|416.8.peg.1199||hypothetical protein|][proka|PROKKA_01169||hypothetical protein|]
pgap	AYM39_05820	1239877	1240935	+	4	girp	1096.5	43.3		1240935		hypothetical protein		[img|Ga0113560_111176||hypothetical protein|][rast|416.8.peg.1200||hypothetical protein|][proka|PROKKA_01170||hypothetical protein|]
pgap	AYM39_05825	1240932	1241390	+	4	girp	459	0		1241390		hypothetical protein		[img|Ga0113560_111177||hypothetical protein|][rast|416.8.peg.1201||hypothetical protein|][proka|PROKKA_01171||hypothetical protein|]
pgap	AYM39_05830	1241387	1244029	+	4	girp	2643	0		1244029		hypothetical protein		[img|Ga0113560_111178||Signal transduction histidine kinase|][rast|416.8.peg.1202||sensory box histidine kinase/response regulator|][proka|PROKKA_01172|barA_3|Signal transduction histidine-protein kinase BarA|2.7.13.3]
pgap	AYM39_05835	1244026	1245816	+	4	girp	1789.5	3		1245816		Fis family transcriptional regulator		[img|Ga0113560_111179||PAS domain S-box-containing protein|][rast|416.8.peg.1203||Formate hydrogenlyase transcriptional activator|][proka|PROKKA_01173|fhlA_1|Formate hydrogenlyase transcriptional activator|]
pgap	AYM39_05840	1245949	1246476	+	4	girp	528	0		1246476		MxaD protein		[img|Ga0113560_111180||mxaD protein|][rast|416.8.peg.1204||MxaD protein|][proka|PROKKA_01174||Polyketide cyclase / dehydrase and lipid transport|]
pgap	AYM39_05845	1246936	1247436	-	4	girp	827.2	217.5		1246936		hypothetical protein		[img|Ga0113560_111181||hypothetical protein|][rast|416.8.peg.1205||hypothetical protein|][proka|PROKKA_01175||hypothetical protein|]
pgap	AYM39_05850	1249255	1249647	-	4	girp	393	0		1249255		hypothetical protein		[img|Ga0113560_111182||hypothetical protein|][rast|416.8.peg.1207||hypothetical protein|][proka|PROKKA_01176||hypothetical protein|]
pgap	AYM39_05855	1249833	1250381	-	4	girp	483.8	43.5	pseudo	1249833		[PSEUDO_pgap: chemotaxis protein CheD]		[img|Ga0113560_111183||chemotaxis protein CheD|3.5.1.44][rast|416.8.peg.1208||Chemotaxis protein CheD|][proka|PROKKA_01177|cheD_1|Chemoreceptor glutamine deamidase CheD|3.5.1.44]
pgap	AYM39_05860	1250594	1250878	-	4	girp	285	0		1250594		hypothetical protein		[img|Ga0113560_111184||hypothetical protein|][rast|416.8.peg.1209||hypothetical protein|][proka|PROKKA_01178||hypothetical protein|]
pgap	AYM39_05865	1250974	1251753	-	4	girp	798	36		1250974		ABC transporter		[img|Ga0113560_111185||phospholipid-binding lipoprotein MlaA|][rast|416.8.peg.1210||Nucleoside ABC transporter, periplasmic nucleoside-binding protein|][proka|PROKKA_01179|mlaA_1|putative phospholipid-binding lipoprotein MlaA precursor|]
pgap	AYM39_05875	1252804	1253007	-	4	girp	204	0		1252804		hypothetical protein		[img|Ga0113560_111187||hypothetical protein|][rast|416.8.peg.1212||hypothetical protein|][proka|PROKKA_01181||hypothetical protein|]
pgap	AYM39_05870	1252059	1252826	+	4	girp	770.2	1.5		1252826		hypothetical protein		[img|Ga0113560_111186||Permease of the drug/metabolite transporter (DMT) superfamily|][rast|416.8.peg.1211||Permease of the drug/metabolite transporter (DMT) superfamily|][proka|PROKKA_01180||putative DMT superfamily transporter inner membrane protein|]
pgap	AYM39_05880	1253230	1254585	+	4	girp	1351.5	9		1254585		hypothetical protein		[img|Ga0113560_111188||hypothetical protein|][rast|416.8.peg.1213||Mlr2412 protein|][proka|PROKKA_01182||hypothetical protein|]
pgap	AYM39_05885	1254642	1256894	-	4	girp	2238.8	28.5		1254642		peptidase C14 caspase catalytic subunit p20		[img|Ga0113560_111189||Sel1 repeat-containing protein|][rast|416.8.peg.1214||hypothetical protein|][proka|PROKKA_01183|podJ_1|Localization factor PodJL|]
pgap	AYM39_05890	1256967	1257785	-	4	girp	811.5	15		1256967		hypothetical protein		[img|Ga0113560_111190||alpha/beta hydrolase fold|][rast|416.8.peg.1215||hypothetical protein|][proka|PROKKA_01184||Alpha/beta hydrolase family protein|]
pgap	AYM39_05895	1257891	1259591	+	4	girp	1701	0		1259591		serine/threonine protein kinase		[img|Ga0113560_111191||Serine/threonine protein kinase|][rast|416.8.peg.1217||Serine/threonine protein kinase (EC 2.7.11.1)|2.7.11.1][proka|PROKKA_01185|spk1|Serine/threonine-protein kinase PK-1|2.7.11.1]
pgap	AYM39_05900	1259716	1260972	+	4	girp	1241.2	10.5		1260972		hypothetical protein		[img|Ga0113560_111192||Autotransporter beta-domain-containing protein|][rast|416.8.peg.1218||bll7882; hypothetical protein|][proka|PROKKA_01186||Extracellular serine protease precursor|3.4.21.-]
pgap	AYM39_05905	1261171	1265082	+	4	girp	3876	24		1265082		FAD-linked oxidase		[img|Ga0113560_111193||Fe-S oxidoreductase|][rast|416.8.peg.1220||FAD/FMN-containing dehydrogenases|][proka|PROKKA_01187||putative FAD-linked oxidoreductase|1.-.-.-]
pgap	AYM39_05915	1265335	1265598	-	1	g	264	0		1265335		hypothetical protein
pgap	AYM39_05920	1265948	1266418	-	4	girp	471	0		1265948		hypothetical protein		[img|Ga0113560_111195||hypothetical protein|][rast|416.8.peg.1222||Phage integrase|][proka|PROKKA_01189||hypothetical protein|]
pgap	AYM39_05925	1266488	1267117	-	4	girp	630	0		1266488		hypothetical protein		[img|Ga0113560_111196||hypothetical protein|][rast|416.8.peg.1223||hypothetical protein|][proka|PROKKA_01190||hypothetical protein|]
img	Ga0113560_111197	1267201	1267401	-	3	irp	201	0		1267201		hypothetical protein		[rast|416.8.peg.1224||hypothetical protein|][proka|PROKKA_01191||hypothetical protein|]
pgap	AYM39_05930	1267466	1267735	-	4	girp	270	0		1267466		hypothetical protein		[img|Ga0113560_111198||hypothetical protein|][rast|416.8.peg.1225||hypothetical protein|][proka|PROKKA_01192||hypothetical protein|]
pgap	AYM39_05935	1267814	1268176	-	4	girp	363	0		1267814		hypothetical protein		[img|Ga0113560_111199||hypothetical protein|][rast|416.8.peg.1226||hypothetical protein|][proka|PROKKA_01193||hypothetical protein|]
pgap	AYM39_05940	1268257	1268835	-	4	girp	579	0		1268257		hypothetical protein		[img|Ga0113560_111200||Phage-related protein, tail component|][rast|416.8.peg.1227||Prophage LambdaSo, tail assembly protein I|][proka|PROKKA_01194||Bacteriophage lambda tail assembly protein I|]
pgap	AYM39_05945	1268859	1269164	-	4	girp	306	0		1268859		hypothetical protein		[img|Ga0113560_111201||hypothetical protein|][rast|416.8.peg.1228||hypothetical protein|][proka|PROKKA_01195||hypothetical protein|]
img	Ga0113560_111202	1269234	1269590	-	2	ip	357	0		1269234		hypothetical protein		[proka|PROKKA_01196||hypothetical protein|]
pgap	AYM39_05950	1269590	1271053	-	4	girp	1464	0		1269590		hypothetical protein		[img|Ga0113560_111203||putative DNA primase/helicase|][rast|416.8.peg.1229||DNA primase (EC 2.7.7.-)|][proka|PROKKA_01197||hypothetical protein|]
pgap	AYM39_05955	1271053	1271919	-	4	girp	867	0		1271053		hypothetical protein		[img|Ga0113560_111204||putative DNA primase/helicase|][rast|416.8.peg.1230||DNA primase (EC 2.7.7.-), phage-associated|][proka|PROKKA_01198|traC_2|DNA primase TraC|2.7.7.-]
pgap	AYM39_05960	1272016	1272321	-	4	girp	328.5	26		1272016		hypothetical protein		[img|Ga0113560_111205||hypothetical protein|][rast|416.8.peg.1231||hypothetical protein|][proka|PROKKA_01199||hypothetical protein|]
pgap	AYM39_05965	1272363	1272749	-	4	girp	387	0		1272363		hypothetical protein		[img|Ga0113560_111206||hypothetical protein|][rast|416.8.peg.1232||hypothetical protein|][proka|PROKKA_01200||hypothetical protein|]
pgap	AYM39_05970	1272746	1273051	-	4	girp	285	42		1272746		hypothetical protein		[img|Ga0113560_111207||hypothetical protein|][rast|416.8.peg.1233||hypothetical protein|][proka|PROKKA_01201||Ash protein family protein|]
pgap	AYM39_05975	1273048	1274904	-	4	girp	1957.5	116		1273048		hypothetical protein		[img|Ga0113560_111208||tape measure domain-containing protein|][rast|416.8.peg.1234||Mu-like prophage protein|][proka|PROKKA_01202||hypothetical protein|]
pgap	AYM39_05980	1275102	1275370	-	1	g	269	0	pseudo	1275102		[PSEUDO_pgap: AlpA family transcriptional regulator]
img	Ga0113560_111209	1275164	1275370	-	3	irp	207	0		1275164		hypothetical protein		[rast|416.8.peg.1235||hypothetical protein|][proka|PROKKA_01203||hypothetical protein|]
pgap	AYM39_05985	1275510	1276133	-	4	girp	624	0		1275510		hypothetical protein		[img|Ga0113560_111210||hypothetical protein|][rast|416.8.peg.1236||hypothetical protein|][proka|PROKKA_01204||hypothetical protein|]
pgap	AYM39_05990	1276385	1276645	+	4	girp	261	0		1276645		hypothetical protein		[img|Ga0113560_111211||cell division protein ZapA|][rast|416.8.peg.1238||possible (AB008550) orf34 [bacteriophage phi CTX]|][proka|PROKKA_01205||Ogr/Delta-like zinc finger|]
pgap	AYM39_05995	1276697	1277101	-	4	girp	367.5	75		1276697		hypothetical protein		[img|Ga0113560_111212||Predicted membrane protein (DUF2335)|][rast|416.8.peg.1239||hypothetical protein|][proka|PROKKA_01206||hypothetical protein|]
img	Ga0113560_111213	1277064	1277276	-	3	irp	213	0		1277064		hypothetical protein		[rast|416.8.peg.1240||hypothetical protein|][proka|PROKKA_01207||hypothetical protein|]
pgap	AYM39_06000	1277663	1278901	-	4	girp	1239	0		1277663		integrase		[img|Ga0113560_111214||Integrase|][rast|416.8.peg.1241||Integrase|][proka|PROKKA_01208|intA_1|Prophage CP4-57 integrase|]
pgap	AYM39_06015	1279323	1279850	-	4	girp	528	0		1279323		hypothetical protein		[img|Ga0113560_111217||hypothetical protein|][rast|416.8.peg.1242||hypothetical protein|][proka|PROKKA_01211||hypothetical protein|]
pgap	AYM39_06020	1280076	1281413	+	4	girp	1336.5	3		1281413		transporter		[img|Ga0113560_111218||Outer membrane protein TolC|][rast|416.8.peg.1243||outer membrane efflux protein|][proka|PROKKA_01212|tolC_1|Outer membrane protein TolC precursor|]
pgap	AYM39_06025	1281434	1282531	+	4	girp	1098	0		1282531		efflux transporter periplasmic adaptor subunit		[img|Ga0113560_111219||RND family efflux transporter, MFP subunit|][rast|416.8.peg.1244||Membrane-fusion protein|][proka|PROKKA_01213|mdtE_1|Multidrug resistance protein MdtE precursor|]
pgap	AYM39_06030	1282528	1285788	+	4	girp	3261	0		1285788		acriflavine resistance protein B		[img|Ga0113560_111220||Multidrug efflux pump subunit AcrB|][rast|416.8.peg.1245||Acriflavin resistance protein|][proka|PROKKA_01214|bepG|Efflux pump membrane transporter BepG|]
img	Ga0113560_111221	1285881	1286591	-	2	ip	711	0		1285881		hypothetical protein		[proka|PROKKA_01215||hypothetical protein|]
pgap	AYM39_06035	1286816	1287739	-	4	girp	924	0		1286816		hypothetical protein		[img|Ga0113560_111222||Protein of unknown function (DUF3616)|][rast|416.8.peg.1246||hypothetical protein|][proka|PROKKA_01216||hypothetical protein|]
pgap	AYM39_06040	1287815	1288504	-	4	girp	690	0		1287815		aquaporin Z		[img|Ga0113560_111223||aquaporin Z|][rast|416.8.peg.1247||Aquaporin Z|][proka|PROKKA_01217|aqpZ|Aquaporin Z|]
pgap	AYM39_06045	1288813	1289619	+	4	girp	807	0		1289619		NAD(+)--dinitrogen-reductase ADP-D-ribosyltransferase		[img|Ga0113560_111224||NAD+---dinitrogen-reductase ADP-D-ribosyltransferase|2.4.2.37][rast|416.8.peg.1248||NAD(+)--dinitrogen-reductase ADP-D-ribosyltransferase (EC 2.4.2.37)|2.4.2.37][proka|PROKKA_01218|draT|NAD(+)--dinitrogen-reductase ADP-D-ribosyltransferase|2.4.2.37]
pgap	AYM39_06050	1289619	1290509	+	4	girp	891	0		1290509		ADP-ribosyl-[dinitrogen reductase] hydrolase		[img|Ga0113560_111225||ADP-ribosyl-[dinitrogen reductase] hydrolase|3.2.2.24][rast|416.8.peg.1249||ADP-ribosyl-(dinitrogen reductase) hydrolase( EC:3.2.2.24 )|][proka|PROKKA_01219|draG|ADP-ribosyl-[dinitrogen reductase] glycohydrolase|3.2.2.24]
pgap	AYM39_06055	1290615	1291550	+	4	girp	936	0		1291550		hypothetical protein		[img|Ga0113560_111226||hypothetical protein|][rast|416.8.peg.1250||hypothetical protein|][proka|PROKKA_01220||hypothetical protein|]
pgap	AYM39_06060	1291713	1291946	+	4	girp	234	0		1291946		acyl carrier protein		[img|Ga0113560_111227|acpP|acyl carrier protein|][rast|416.8.peg.1251||Acyl carrier protein|][proka|PROKKA_01221|acpP_1|Acyl carrier protein|]
pgap	AYM39_06065	1292041	1293285	+	4	girp	1167	90.1		1293285		beta-ketoacyl-[acyl-carrier-protein] synthase II		[img|Ga0113560_111228||3-oxoacyl-[acyl-carrier-protein] synthase II|2.3.1.179][rast|416.8.peg.1252||3-oxoacyl-[acyl-carrier-protein] synthase, KASII (EC 2.3.1.179)|2.3.1.179][proka|PROKKA_01222|fabF_3|3-oxoacyl-[acyl-carrier-protein] synthase 2|2.3.1.179]
pgap	AYM39_06070	1293313	1294152	+	4	girp	840	0		1294152		4-amino-4-deoxychorismate lyase		[img|Ga0113560_111229||4-amino-4-deoxychorismate lyase|4.1.3.38][rast|416.8.peg.1253||Aminodeoxychorismate lyase (EC 4.1.3.38)|4.1.3.38][proka|PROKKA_01223|pabC|Aminodeoxychorismate lyase|4.1.3.38]
pgap	AYM39_06075	1294170	1295126	+	4	girp	981.8	16.5		1295126		aminodeoxychorismate lyase		[img|Ga0113560_111230||UPF0755 protein|][rast|416.8.peg.1254||FIG004453: protein YceG like|][proka|PROKKA_01224||putative aminodeoxychorismate lyase|]
pgap	AYM39_06080	1295123	1295749	+	4	girp	627	0		1295749		thymidylate kinase		[img|Ga0113560_111231||dTMP kinase|2.7.4.9][rast|416.8.peg.1255||Thymidylate kinase (EC 2.7.4.9)|2.7.4.9][proka|PROKKA_01225|tmk|Thymidylate kinase|2.7.4.9]
pgap	AYM39_06085	1295737	1296732	+	4	girp	996	0		1296732		DNA polymerase III subunit delta'		[img|Ga0113560_111232||DNA polymerase-3 subunit delta'|2.7.7.7][rast|416.8.peg.1256||DNA polymerase III delta prime subunit (EC 2.7.7.7)|2.7.7.7][proka|PROKKA_01226|holB|DNA polymerase III subunit delta'|2.7.7.7]
pgap	AYM39_06090	1296737	1297087	+	4	girp	351	0		1297087		pilus assembly protein PilZ		[img|Ga0113560_111233||type IV pilus assembly protein PilZ|][rast|416.8.peg.1257||Type IV pilus biogenesis protein PilZ|][proka|PROKKA_01227||PilZ domain protein|]
pgap	AYM39_06095	1297134	1297931	+	4	girp	798	0		1297931		deoxyribonuclease		[img|Ga0113560_111234||TatD DNase family protein|3.1.21.-][rast|416.8.peg.1258||Putative deoxyribonuclease YcfH|][proka|PROKKA_01228|ycfH_1|putative deoxyribonuclease YcfH|3.1.21.-]
pgap	AYM39_06100	1298132	1299265	+	4	girp	1134	0		1299265		50S rRNA methyltransferase		[img|Ga0113560_111235||16S rRNA (guanine1207-N2)-methyltransferase|2.1.1.172][rast|416.8.peg.1259||23S rRNA (guanine-N-2-) -methyltransferase rlmG (EC 2.1.1.-)|][proka|PROKKA_01229|rlmG|Ribosomal RNA large subunit methyltransferase G|2.1.1.174]
pgap	AYM39_06105	1299271	1300134	-	4	girp	864	0		1299271		glycosyl transferase		[img|Ga0113560_111236||Glycosyltransferase involved in cell wall bisynthesis|][rast|416.8.peg.1260||Glycosyltransferase involved in cell wall biogenesis|][proka|PROKKA_01230|arnC_1|Undecaprenyl-phosphate 4-deoxy-4-formamido-L-arabinose transferase|2.4.2.53]
pgap	AYM39_06110	1300206	1300973	-	4	girp	768	0		1300206		hydroxyacylglutathione hydrolase		[img|Ga0113560_111237||hydroxyacylglutathione hydrolase|3.1.2.6][rast|416.8.peg.1261||Hydroxyacylglutathione hydrolase (EC 3.1.2.6)|3.1.2.6][proka|PROKKA_01231|gloB_1|Hydroxyacylglutathione hydrolase|3.1.2.6]
pgap	AYM39_06115	1301072	1302934	-	4	girp	1863	0		1301072		1-deoxy-D-xylulose-5-phosphate synthase		[img|Ga0113560_111238||1-deoxy-D-xylulose-5-phosphate synthase|2.2.1.7][rast|416.8.peg.1262||1-deoxy-D-xylulose 5-phosphate synthase (EC 2.2.1.7)|2.2.1.7][proka|PROKKA_01232|dxs_1|1-deoxy-D-xylulose-5-phosphate synthase|2.2.1.7]
pgap	AYM39_06120	1302936	1304567	-	4	girp	1632	0		1302936		copper resistance protein		[img|Ga0113560_111239||putative copper resistance protein D|][rast|416.8.peg.1263||Copper resistance protein D|][proka|PROKKA_01233||Copper resistance protein D|]
pgap	AYM39_06125	1304574	1304933	-	4	girp	360	0		1304574		copper resistance protein CopC		[img|Ga0113560_111240||hypothetical protein|][rast|416.8.peg.1264||hypothetical protein|][proka|PROKKA_01234||Copper resistance protein CopC|]
pgap	AYM39_06130	1304944	1306329	-	4	girp	1386	0		1304944		aminotransferase		[img|Ga0113560_111241||ornithine--oxo-acid transaminase|2.6.1.13][rast|416.8.peg.1265||Acetylornithine aminotransferase (EC 2.6.1.11)|2.6.1.11][proka|PROKKA_01235|patA_1|Putrescine aminotransferase|2.6.1.82]
pgap	AYM39_06135	1306411	1307115	-	4	girp	705	0		1306411		phosphorylase		[img|Ga0113560_111242||adenosylhomocysteine nucleosidase|3.2.2.9][rast|416.8.peg.1266||Adenosylhopane nucleosidase, HpnG|][proka|PROKKA_01236|mtnN|5'-methylthioadenosine/S-adenosylhomocysteine nucleosidase|3.2.2.9]
pgap	AYM39_06140	1307117	1309075	-	4	girp	1959	0		1307117		squalene--hopene cyclase		[img|Ga0113560_111243||squalene-hopene/tetraprenyl-beta-curcumene cyclase|5.4.99.17; 4.2.1.129][rast|416.8.peg.1267||Squalene--hopene cyclase (EC 5.4.99.17)|5.4.99.17][proka|PROKKA_01237|shc|Squalene--hopene cyclase|4.2.1.129]
pgap	AYM39_06145	1309085	1310176	-	4	girp	1092	0		1309085		phytoene synthase		[img|Ga0113560_111244||farnesyl-diphosphate farnesyltransferase|2.5.1.21][rast|416.8.peg.1268||Phytoene synthase (EC 2.5.1.32)|2.5.1.32][proka|PROKKA_01238|crtB|All-trans-phytoene synthase|2.5.1.99]
pgap	AYM39_06150	1310613	1311716	+	4	girp	1104	0		1311716		radical SAM protein		[img|Ga0113560_111245||hopanoid biosynthesis associated radical SAM protein HpnH|][rast|416.8.peg.1269||Radical SAM protein required for addition of adenosine to hopane skeleton, HpnH|][proka|PROKKA_01239|moaA1|Cyclic pyranopterin monophosphate synthase 1|4.1.99.18]
pgap	AYM39_06155	1311764	1312357	+	4	girp	600	6.9		1312357		hopanoid biosynthesis protein HpnM		[img|Ga0113560_111246||phospholipid transport system substrate-binding protein|][rast|416.8.peg.1270||ABC-type transport system involved in resistance to organic solvents, auxiliary component|][proka|PROKKA_01240|mlaC_2|putative phospholipid-binding protein MlaC precursor|]
pgap	AYM39_06160	1312378	1313388	+	4	girp	1011	0		1313388		ABC transporter		[img|Ga0113560_111247||phospholipid-binding lipoprotein MlaA|][rast|416.8.peg.1271||VacJ lipoprotein|][proka|PROKKA_01241|mlaA_2|putative phospholipid-binding lipoprotein MlaA precursor|]
pgap	AYM39_06165	1313431	1313946	-	4	girp	516	0		1313431		adenine phosphoribosyltransferase		[img|Ga0113560_111248||adenine phosphoribosyltransferase|2.4.2.7][rast|416.8.peg.1272||Adenine phosphoribosyltransferase (EC 2.4.2.7)|2.4.2.7][proka|PROKKA_01242|apt|Adenine phosphoribosyltransferase|2.4.2.7]
pgap	AYM39_06170	1313961	1315823	-	4	girp	1863	0		1313961		1-deoxy-D-xylulose-5-phosphate synthase		[img|Ga0113560_111249||1-deoxy-D-xylulose-5-phosphate synthase|2.2.1.7][rast|416.8.peg.1273||1-deoxy-D-xylulose 5-phosphate synthase (EC 2.2.1.7)|2.2.1.7][proka|PROKKA_01243|dxs_2|1-deoxy-D-xylulose-5-phosphate synthase|2.2.1.7]
pgap	AYM39_06175	1315871	1316764	-	4	girp	894	0		1315871		geranyl transferase		[img|Ga0113560_111250||farnesyl diphosphate synthase|2.5.1.1; 2.5.1.10][rast|416.8.peg.1274||Octaprenyl-diphosphate synthase (EC 2.5.1.-) / Dimethylallyltransferase (EC 2.5.1.1) / Geranyltranstransferase (farnesyldiphosphate synthase) (EC 2.5.1.10) / Geranylgeranyl pyrophosphate synthetase (EC 2.5.1.29)|2.5.1.10; 2.5.1.29; 2.5.1.1][proka|PROKKA_01244|ispA|Farnesyl diphosphate synthase|2.5.1.10]
pgap	AYM39_06180	1316757	1316990	-	4	girp	224.2	19.5		1316757		exodeoxyribonuclease VII small subunit		[img|Ga0113560_111251||exodeoxyribonuclease VII small subunit|3.1.11.6][rast|416.8.peg.1275||Exodeoxyribonuclease VII small subunit (EC 3.1.11.6)|3.1.11.6][proka|PROKKA_01245|xseB|Exodeoxyribonuclease 7 small subunit|3.1.11.6]
pgap	AYM39_06185	1317283	1320309	+	4	girp	3027	0		1320309		helicase		[img|Ga0113560_111252||Helicase conserved C-terminal domain-containing protein|][rast|416.8.peg.1277||Helicase, SNF2/RAD54 family|][proka|PROKKA_01246|rapA_1|RNA polymerase-associated protein RapA|3.6.4.-]
pgap	AYM39_06190	1320527	1321624	+	4	girp	1098	0		1321624		transposase		[img|Ga0113560_111253||Transposase|][rast|416.8.peg.1278||Mobile element protein|][proka|PROKKA_01247||Transposase DDE domain protein|]
pgap	AYM39_06195	1322237	1322734	+	4	girp	404.2	187.5		1322734		hypothetical protein		[img|Ga0113560_111254||conserved hypothetical phage tail region protein|][rast|416.8.peg.1279||hypothetical protein|][proka|PROKKA_01248||T4-like virus tail tube protein gp19|]
pgap	AYM39_06200	1323140	1325032	+	4	girp	1875	36		1325032		DNA topoisomerase IV subunit B		[img|Ga0113560_111255|parE|topoisomerase-4 subunit B|5.99.1.-][rast|416.8.peg.1280||Topoisomerase IV subunit B (EC 5.99.1.-)|][proka|PROKKA_01249|parE|DNA topoisomerase 4 subunit B|5.99.1.3]
pgap	AYM39_06205	1325072	1325506	-	4	girp	493.5	39		1325072		hypothetical protein		[img|Ga0113560_111256||hypothetical protein|][rast|416.8.peg.1281||hypothetical protein|][proka|PROKKA_01250||hypothetical protein|]
pgap	AYM39_06210	1325804	1326652	+	4	girp	849	0		1326652		GntR family transcriptional regulator		[img|Ga0113560_111257||hypothetical protein|][rast|416.8.peg.1282||hypothetical protein|][proka|PROKKA_01251||hypothetical protein|]
pgap	AYM39_06215	1326710	1327192	-	4	girp	483	0		1326710		cytochrome C		[img|Ga0113560_111258||Cytochrome P460|][rast|416.8.peg.1283||probable cytochrome|][proka|PROKKA_01252||hypothetical protein|]
pgap	AYM39_06220	1327310	1327858	-	4	girp	549	0		1327310		aldehyde-activating protein		[img|Ga0113560_111259|fae|formaldehyde-activating enzyme|][rast|416.8.peg.1284||Formaldehyde activating enzyme|][proka|PROKKA_01253|fae_1|Formaldehyde-activating enzyme|4.3.3.-]
pgap	AYM39_06225	1328058	1328354	+	4	girp	297	0		1328354		transposase		[img|Ga0113560_111260||transposase|][rast|416.8.peg.1285||Mobile element protein|][proka|PROKKA_01254||Transposase|]
pgap	AYM39_06230	1328351	1328755	+	1	g	405	0	pseudo	1328755		[PSEUDO_pgap: transposase]
img	Ga0113560_111261	1328351	1328776	+	3	irp	412	24.2		1328776		HTH-like domain-containing protein		[rast|416.8.peg.1286||Mobile element protein|][proka|PROKKA_01255||hypothetical protein|]
pgap	AYM39_06235	1329268	1330509	+	4	girp	1242	0		1330509		group II intron reverse transcriptase/maturase		[img|Ga0113560_111263||RNA-directed DNA polymerase|2.7.7.49][rast|416.8.peg.1287||Retron-type RNA-directed DNA polymerase (EC 2.7.7.49)|2.7.7.49][proka|PROKKA_01256|ltrA_2|Group II intron-encoded protein LtrA|]
pgap	AYM39_06240	1330589	1331074	+	4	girp	492	27.2	pseudo	1331074		[PSEUDO_pgap: transposase]		[img|Ga0113560_111265||Integrase core domain-containing protein|][rast|416.8.peg.1288||Mobile element protein|][proka|PROKKA_01257||Integrase core domain protein|]
pgap	AYM39_06245	1331117	1331773	-	4	girp	657	0		1331117		pyridoxamine 5'-phosphate oxidase		[img|Ga0113560_111266||hypothetical protein|][rast|416.8.peg.1289||Pyridoxamine 5'-phosphate oxidase (EC 1.4.3.5)|1.4.3.5][proka|PROKKA_01258||Pyridoxamine 5'-phosphate oxidase|]
pgap	AYM39_06250	1332172	1332699	+	4	girp	528	0		1332699		hypothetical protein		[img|Ga0113560_111267||RNA polymerase sigma-70 factor, ECF subfamily|][rast|416.8.peg.1291||FIG006045: Sigma factor, ECF subfamily|][proka|PROKKA_01259|fecI_3|putative RNA polymerase sigma factor FecI|]
pgap	AYM39_06255	1332755	1333816	+	4	girp	1062	0		1333816		hypothetical protein		[img|Ga0113560_111268||transmembrane sensor|][rast|416.8.peg.1292||FecR-like transmembrane sensor|][proka|PROKKA_01260||fec operon regulator FecR|]
pgap	AYM39_06260	1334024	1335003	+	4	girp	821	106	pseudo	1335003		[PSEUDO_pgap: transposase]		[img|Ga0113560_111269||transposase, IS5 family|][rast|416.8.peg.1293||Mobile element protein|][proka|PROKKA_01261||Transposase DDE domain protein|]
pgap	AYM39_06265	1335348	1337690	+	4	girp	2368.5	29.4		1337690		hypothetical protein		[img|Ga0113560_111270||iron complex outermembrane recepter protein|][rast|416.8.peg.1294||Ferrichrome-iron receptor|][proka|PROKKA_01262|fhuA_3|Ferrichrome-iron receptor precursor|]
pgap	AYM39_06270	1337899	1338414	+	4	girp	516	0		1338414		RNA polymerase subunit sigma-24		[img|Ga0113560_111271||RNA polymerase sigma-70 factor, ECF subfamily|][rast|416.8.peg.1296||FIG006045: Sigma factor, ECF subfamily|][proka|PROKKA_01263|fecI_4|putative RNA polymerase sigma factor FecI|]
pgap	AYM39_06275	1338519	1340528	-	4	girp	2010	0		1338519		TonB-dependent receptor		[img|Ga0113560_111272||iron complex outermembrane recepter protein|][rast|416.8.peg.1297||TonB-dependent receptor; Outer membrane receptor for ferrienterochelin and colicins|][proka|PROKKA_01264|cirA_5|Colicin I receptor precursor|]
pgap	AYM39_06280	1340841	1342289	-	4	girp	1449	0		1340841		hypothetical protein		[img|Ga0113560_111273||outer membrane protein, multidrug efflux system|][rast|416.8.peg.1299||RND efflux system, outer membrane lipoprotein CmeC|][proka|PROKKA_01265|ttgI_3|Toluene efflux pump outer membrane protein TtgI precursor|]
pgap	AYM39_06285	1342295	1345468	-	4	girp	3174	0		1342295		RND transporter		[img|Ga0113560_111274||multidrug efflux pump|][rast|416.8.peg.1300||RND efflux system, inner membrane transporter CmeB|][proka|PROKKA_01266|bepE_1|Efflux pump membrane transporter BepE|]
pgap	AYM39_06290	1345472	1346599	-	4	girp	1192.5	43.4		1345472		efflux transporter periplasmic adaptor subunit		[img|Ga0113560_111275||membrane fusion protein, multidrug efflux system|][rast|416.8.peg.1301||RND efflux system, membrane fusion protein CmeA|][proka|PROKKA_01267|bepF|Efflux pump periplasmic linker BepF|]
pgap	AYM39_06295	1346784	1347398	+	4	girp	615	0		1347398		TetR family transcriptional regulator		[img|Ga0113560_111276||DNA-binding transcriptional regulator, AcrR family|][rast|416.8.peg.1302||Transcriptional regulator, TetR family|][proka|PROKKA_01268|comR|HTH-type transcriptional repressor ComR|]
pgap	AYM39_06300	1347416	1351207	-	4	girp	3792	0		1347416		hybrid sensor histidine kinase/response regulator		[img|Ga0113560_111277||PAS domain S-box-containing protein|][rast|416.8.peg.1303||diguanylate cyclase/phosphodiesterase (GGDEF & EAL domains) with PAS/PAC sensor(s)|][proka|PROKKA_01269|barA_4|Signal transduction histidine-protein kinase BarA|2.7.13.3]
pgap	AYM39_06305	1351481	1352770	-	4	girp	1290	0		1351481		C4-dicarboxylate transporter		[img|Ga0113560_111278||aerobic C4-dicarboxylate transport protein|][rast|416.8.peg.1304||Aerobic C4-dicarboxylate transporter for fumarate, L-malate, D-malate, succunate, aspartate|][proka|PROKKA_01270|dctA|Aerobic C4-dicarboxylate transport protein|]
pgap	AYM39_06310	1352880	1353449	+	4	girp	570	0		1353449		hypothetical protein		[img|Ga0113560_111279||hypothetical protein|][rast|416.8.peg.1305||hypothetical protein|][proka|PROKKA_01271||hypothetical protein|]
pgap	AYM39_06315	1353452	1354792	-	4	girp	1343.2	4.5		1353452		peptide ABC transporter		[img|Ga0113560_111280||proton-dependent oligopeptide transporter, POT family|][rast|416.8.peg.1306||Di-/tripeptide transporter|][proka|PROKKA_01272|dtpT|Di-/tripeptide transporter|]
pgap	AYM39_06320	1355095	1355577	+	4	girp	483	0		1355577		hypothetical protein		[img|Ga0113560_111281||MSMEG_0572 family protein|][rast|416.8.peg.1307||FIG01150669: hypothetical protein|][proka|PROKKA_01273||hypothetical protein|]
pgap	AYM39_06325	1355693	1356700	+	4	girp	1008	0		1356700		aliphatic nitrilase		[img|Ga0113560_111282||aliphatic nitrilase|3.5.5.7][rast|416.8.peg.1308||Nitrilase (EC 3.5.5.7)|3.5.5.7][proka|PROKKA_01274|nitA|Aliphatic nitrilase|3.5.5.7]
pgap	AYM39_06330	1356720	1357790	+	4	girp	1102.5	21		1357790		radical SAM protein		[img|Ga0113560_111283||radical SAM protein, MSMEG_0568 family|][rast|416.8.peg.1309||Biotin synthase-related enzyme|][proka|PROKKA_01275||Radical SAM superfamily protein|]
pgap	AYM39_06335	1357792	1358334	+	4	girp	543	0		1358334		histone acetyltransferase		[img|Ga0113560_111284||putative N-acetyltransferase, MSMEG_0567 N-terminal domain family|][rast|416.8.peg.1310||Histone acetyltransferase HPA2 and related acetyltransferases|][proka|PROKKA_01276||Acetyltransferase (GNAT) family protein|]
pgap	AYM39_06340	1358331	1359428	+	4	girp	1098	0		1359428		hypothetical protein		[img|Ga0113560_111285||hypothetical protein|][rast|416.8.peg.1311||Selenophosphate synthetase-related protein MJ0640|][proka|PROKKA_01277||thiamine monophosphate kinase|]
pgap	AYM39_06345	1359425	1360600	+	4	girp	1176	0		1360600		hypothetical protein		[img|Ga0113560_111286||glycosyltransferase, MSMEG_0565 family|][rast|416.8.peg.1312||Glycosyltransferase|][proka|PROKKA_01278|mfpsA|Mannosylfructose-phosphate synthase|2.4.1.246]
pgap	AYM39_06350	1360593	1360880	+	4	girp	288	0		1360880		hypothetical protein		[img|Ga0113560_111287||MSMEG_0570 family protein|][rast|416.8.peg.1313||NAD/NADP transhydrogenase alpha subunit|][proka|PROKKA_01279||hypothetical protein|]
pgap	AYM39_06355	1361041	1362306	+	4	girp	1266	0		1362306		FAD-dependent oxidoreductase		[img|Ga0113560_111288||putative flavoprotein involved in K+ transport|][rast|416.8.peg.1314||monooxygenase, putative|][proka|PROKKA_01280|czcO|putative oxidoreductase CzcO|1.-.-.-]
pgap	AYM39_06360	1362429	1363859	+	4	girp	1434	6		1363859		GntR family transcriptional regulator		[img|Ga0113560_111289||DNA-binding transcriptional regulator, MocR family, contains an aminotransferase domain|][rast|416.8.peg.1315||Transcriptional regulator, GntR family domain / Aspartate aminotransferase (EC 2.6.1.1)|2.6.1.1][proka|PROKKA_01281|yjiR_2|putative HTH-type transcriptional regulator YjiR|]
pgap	AYM39_06365	1364116	1365471	-	4	girp	1356	0		1364116		hypothetical protein		[img|Ga0113560_111290||hypothetical protein|][rast|416.8.peg.1316||hypothetical protein|][proka|PROKKA_01282||hypothetical protein|]
pgap	AYM39_06370	1365468	1367981	-	4	girp	2514	0		1365468		hypothetical protein		[img|Ga0113560_111291||Predicted membrane protein (DUF2339)|][rast|416.8.peg.1317||hypothetical protein|][proka|PROKKA_01283||hypothetical protein|]
pgap	AYM39_06375	1368209	1369816	+	4	girp	1608	0		1369816		chemotaxis protein		[img|Ga0113560_111292||methyl-accepting chemotaxis protein|][rast|416.8.peg.1319||Methyl-accepting chemotaxis protein|][proka|PROKKA_01284|pctB_2|Methyl-accepting chemotaxis protein PctB|]
pgap	AYM39_06380	1370053	1371471	+	4	girp	1419	0		1371471		glycosyl transferase family 1		[img|Ga0113560_111293||Uncharacterized conserved protein|][rast|416.8.peg.1320||hypothetical protein|][proka|PROKKA_01285||hypothetical protein|]
pgap	AYM39_06385	1371670	1372542	-	4	girp	873	0		1371670		hypothetical protein		[img|Ga0113560_111294||WYL domain-containing protein|][rast|416.8.peg.1321||COGs COG2378|][proka|PROKKA_01286||hypothetical protein|]
pgap	AYM39_06390	1372682	1375249	+	4	girp	2568	0		1375249		hypothetical protein		[img|Ga0113560_111295||CRISPR-associated endonuclease/helicase Cas3|3.6.4.-; 3.1.-][rast|416.8.peg.1322||CRISPR-associated helicase Cas3|][proka|PROKKA_01287|ygcB_1|CRISPR-associated endonuclease/helicase Cas3|3.1.-.-]
pgap	AYM39_06395	1375289	1375528	+	4	girp	240	0		1375528		hypothetical protein		[img|Ga0113560_111296||Antitoxin Phd_YefM, type II toxin-antitoxin system|][rast|416.8.peg.1323||hypothetical protein|][proka|PROKKA_01288||Phd_YefM|]
pgap	AYM39_06400	1375528	1375809	+	4	girp	282	0		1375809		hypothetical protein		[img|Ga0113560_111297||mRNA interferase RelE/StbE|][rast|416.8.peg.1324||hypothetical protein|][proka|PROKKA_01289||Plasmid stabilization system protein|]
pgap	AYM39_06405	1375820	1377370	+	4	girp	1551	0		1377370		type I-E CRISPR-associated protein Cse1/CasA		[img|Ga0113560_111298||CRISPR system Cascade subunit CasA|][rast|416.8.peg.1325||CRISPR-associated protein, Cse1 family|][proka|PROKKA_01290|casA|CRISPR system Cascade subunit CasA|]
pgap	AYM39_06410	1377367	1377909	+	4	girp	543	0		1377909		hypothetical protein		[img|Ga0113560_111299||CRISPR system Cascade subunit CasB|][rast|416.8.peg.1326||CRISPR-associated protein, Cse2 family|][proka|PROKKA_01291|casB|CRISPR system Cascade subunit CasB|]
pgap	AYM39_06415	1377896	1378153	+	4	girp	248.2	19.5		1378153		transcriptional regulator		[img|Ga0113560_111300||protein of unknown function (DUF4160)|][rast|416.8.peg.1327||putative ORF-2|][proka|PROKKA_01292||hypothetical protein|]
pgap	AYM39_06420	1378157	1378399	+	4	girp	243	0		1378399		hypothetical protein		[img|Ga0113560_111301||Protein of unknown function (DUF2442)|][rast|416.8.peg.1328||hypothetical protein|][proka|PROKKA_01293||hypothetical protein|]
pgap	AYM39_06425	1378410	1379570	+	4	girp	1161	0		1379570		hypothetical protein		[img|Ga0113560_111302||CRISPR system Cascade subunit CasC|][rast|416.8.peg.1329||CRISPR-associated protein, Cse4 family|][proka|PROKKA_01294|casC|CRISPR system Cascade subunit CasC|]
pgap	AYM39_06430	1379573	1380283	+	4	girp	711	0		1380283		type I-E CRISPR-associated protein Cas5/CasD		[img|Ga0113560_111303||CRISPR system Cascade subunit CasD|][rast|416.8.peg.1330||CRISPR-associated protein, Cas5e family|][proka|PROKKA_01295|casD|CRISPR system Cascade subunit CasD|]
pgap	AYM39_06435	1380397	1381494	-	4	girp	1098	0		1380397		transposase		[img|Ga0113560_111304||Transposase|][rast|416.8.peg.1331||Mobile element protein|][proka|PROKKA_01296||Transposase DDE domain protein|]
pgap	AYM39_06440	1381607	1382326	+	4	girp	720	0		1382326		hypothetical protein		[img|Ga0113560_111305||CRISPR system Cascade subunit CasE|][rast|416.8.peg.1332||CRISPR-associated protein, Cse3 family|][proka|PROKKA_01297|casE|CRISPR system Cascade subunit CasE|3.1.-.-]
pgap	AYM39_06445	1382374	1382649	+	4	girp	276	0		1382649		prevent-host-death protein		[img|Ga0113560_111306||prevent-host-death family protein|][rast|416.8.peg.1333||Prevent host death protein, Phd antitoxin|][proka|PROKKA_01298||Phd_YefM|]
pgap	AYM39_06450	1382646	1382975	+	4	girp	330	0		1382975		addiction module toxin RelE		[img|Ga0113560_111307||toxin ParE1/3/4|][rast|416.8.peg.1334||Death on curing protein, Doc toxin|][proka|PROKKA_01299||Plasmid stabilization system protein|]
pgap	AYM39_06455	1383010	1383921	+	4	girp	900.8	22.5		1383921		type I-E CRISPR-associated endonuclease Cas1		[img|Ga0113560_111308|cas1|CRISP-associated protein Cas1|][rast|416.8.peg.1335||CRISPR-associated protein Cas1|][proka|PROKKA_01300|ygbT|CRISPR-associated endonuclease Cas1|3.1.-.-]
pgap	AYM39_06460	1383902	1384225	+	4	girp	324	0		1384225		type I-E CRISPR-associated endoribonuclease Cas2		[img|Ga0113560_111309||CRISPR-associated protein Cas2|][rast|416.8.peg.1336||CRISPR-associated protein, Cas2|][proka|PROKKA_01301|ygbF|CRISPR-associated endoribonuclease Cas2|3.1.-.-]
pgap	AYM39_06465	1389097	1390527	+	4	girp	1431	0		1390527		glutamate--cysteine ligase		[img|Ga0113560_111310||Gamma-glutamyl:cysteine ligase YbdK, ATP-grasp superfamily|][rast|416.8.peg.1338||FIG01182057: hypothetical protein|][proka|PROKKA_01302|ybdK|Carboxylate-amine ligase YbdK|]
pgap	AYM39_06470	1390617	1391651	+	4	girp	1035	0		1391651		peptidase M14		[img|Ga0113560_111311||Succinylglutamate desuccinylase / Aspartoacylase family protein|][rast|416.8.peg.1339||FIG01181905: hypothetical protein|][proka|PROKKA_01303||Succinylglutamate desuccinylase / Aspartoacylase family protein|]
pgap	AYM39_06475	1391997	1393355	+	4	girp	1359	0		1393355		hypothetical protein		[img|Ga0113560_111312||hypothetical protein|][rast|416.8.peg.1340||hypothetical protein|][proka|PROKKA_01304||hypothetical protein|]
pgap	AYM39_06480	1393365	1394843	+	4	girp	1479	0		1394843		hypothetical protein		[img|Ga0113560_111313||N-acetylmuramoyl-L-alanine amidase|][rast|416.8.peg.1341||Negative regulator of beta-lactamase expression|][proka|PROKKA_01305||N-acetyl-anhydromuranmyl-L-alanine amidase|]
pgap	AYM39_06485	1395069	1395686	-	4	girp	618	0		1395069		urease accessory protein UreG		[img|Ga0113560_111314||urease accessory protein|][rast|416.8.peg.1342||Urease accessory protein UreG|][proka|PROKKA_01306|ureG|Urease accessory protein UreG|]
pgap	AYM39_06490	1395947	1396621	-	4	girp	675	0		1395947		urease accessory protein UreF		[img|Ga0113560_111315||urease accessory protein|][rast|416.8.peg.1343||Urease accessory protein UreF|][proka|PROKKA_01307|ureF|Urease accessory protein UreF|]
pgap	AYM39_06495	1396611	1397042	-	4	girp	432	0		1396611		urease accessory protein UreE		[img|Ga0113560_111316||urease accessory protein|][rast|416.8.peg.1344||Urease accessory protein UreE|][proka|PROKKA_01308|ureE|Urease accessory protein UreE|]
pgap	AYM39_06500	1399071	1400102	-	4	girp	1032	0		1399071		transposase		[img|Ga0113560_111317||Transposase and inactivated derivatives, IS5 family|][rast|416.8.peg.1345||Mobile element protein|][proka|PROKKA_01309||Transposase DDE domain protein|]
pgap	AYM39_06505	1400222	1401925	-	4	girp	1704	0		1400222	ureC	urease subunit alpha		[img|Ga0113560_111318|ureC|urease subunit alpha|3.5.1.5][rast|416.8.peg.1346||Urease alpha subunit (EC 3.5.1.5)|3.5.1.5][proka|PROKKA_01310|ureC|Urease subunit alpha|3.5.1.5]
pgap	AYM39_06510	1401922	1402239	-	4	girp	318	0		1401922	ureB	urease subunit beta		[img|Ga0113560_111319|ureB|urease subunit beta|3.5.1.5][rast|416.8.peg.1347||Urease beta subunit (EC 3.5.1.5)|3.5.1.5][proka|PROKKA_01311|ureB|Urease subunit beta|3.5.1.5]
pgap	AYM39_06515	1402302	1402799	-	4	girp	438.8	118.5		1402302		hypothetical protein		[img|Ga0113560_111320||hypothetical protein|][rast|416.8.peg.1348||hypothetical protein|][proka|PROKKA_01312||hypothetical protein|]
pgap	AYM39_06520	1402859	1403161	-	4	girp	303	0		1402859	ureA	urease subunit gamma		[img|Ga0113560_111321|ureA|urease subunit gamma|3.5.1.5][rast|416.8.peg.1349||Urease gamma subunit (EC 3.5.1.5)|3.5.1.5][proka|PROKKA_01313|ureA|Urease subunit gamma|3.5.1.5]
pgap	AYM39_06525	1403295	1403546	+	4	girp	252	0		1403546		antitoxin		[img|Ga0113560_111322||antitoxin YefM|][rast|416.8.peg.1350||YefM protein (antitoxin to YoeB)|][proka|PROKKA_01314|yefM|Antitoxin YefM|]
pgap	AYM39_06530	1403543	1403803	+	4	girp	261	0		1403803		toxin YoeB		[img|Ga0113560_111323||toxin YoeB|3.1.-][rast|416.8.peg.1351||YoeB toxin protein|][proka|PROKKA_01315|yoeB|Toxin YoeB|3.1.-.-]
img	Ga0113560_111324	1404088	1404738	-	2	ip	651	0		1404088		hypothetical protein		[proka|PROKKA_01316||hypothetical protein|]
pgap	AYM39_06535	1405206	1405472	-	4	girp	267	0		1405206		hypothetical protein		[img|Ga0113560_111325||mRNA interferase RelE/StbE|][rast|416.8.peg.1352||RelE/StbE replicon stabilization toxin|][proka|PROKKA_01317||Plasmid stabilization system protein|]
pgap	AYM39_06540	1405472	1405705	-	4	girp	204.8	19.5		1405472		hypothetical protein		[img|Ga0113560_111326||hypothetical protein|][rast|416.8.peg.1353||hypothetical protein|][proka|PROKKA_01318||hypothetical protein|]
pgap	AYM39_06545	1405730	1406581	-	4	girp	852	0		1405730		urease accessory protein UreD		[img|Ga0113560_111327||urease accessory protein|][rast|416.8.peg.1354||Urease accessory protein UreD|][proka|PROKKA_01319|ureD|Urease accessory protein UreD|]
pgap	AYM39_06550	1406594	1406899	-	4	girp	306	0		1406594		hypothetical protein		[img|Ga0113560_111328||hypothetical protein|][rast|416.8.peg.1355||hypothetical protein|][proka|PROKKA_01320||hypothetical protein|]
pgap	AYM39_06555	1406994	1407767	-	4	girp	774	0		1406994		urea ABC transporter ATP-binding subunit UrtE		[img|Ga0113560_111329||urea transport system ATP-binding protein|][rast|416.8.peg.1356||Urea ABC transporter, ATPase protein UrtE|][proka|PROKKA_01321|livF|High-affinity branched-chain amino acid transport ATP-binding protein LivF|]
pgap	AYM39_06560	1407767	1408576	-	4	girp	810	0		1407767		urea ABC transporter ATP-binding protein UrtD		[img|Ga0113560_111330||urea transport system ATP-binding protein|][rast|416.8.peg.1357||Urea ABC transporter, ATPase protein UrtD|][proka|PROKKA_01322|lptB_1|Lipopolysaccharide export system ATP-binding protein LptB|3.6.3.-]
pgap	AYM39_06565	1408573	1409697	-	4	girp	1125	0		1408573		urea ABC transporter permease subunit UrtC		[img|Ga0113560_111331||urea transport system permease protein|][rast|416.8.peg.1358||Urea ABC transporter, permease protein UrtC|][proka|PROKKA_01323||leucine/isoleucine/valine transporter permease subunit|]
pgap	AYM39_06570	1410267	1411895	-	4	girp	1820.2	127.5		1410267		urea ABC transporter permease		[img|Ga0113560_111332||urea transport system permease protein|][rast|416.8.peg.1359||Urea ABC transporter, permease protein UrtB|][proka|PROKKA_01324|livH|High-affinity branched-chain amino acid transport system permease protein LivH|]
pgap	AYM39_06575	1412219	1413520	-	4	girp	1302	0		1412219		branched-chain amino acid ABC transporter substrate-binding protein		[img|Ga0113560_111333||urea transport system substrate-binding protein|][rast|416.8.peg.1360||Urea ABC transporter, urea binding protein|][proka|PROKKA_01325|amiC_1|Aliphatic amidase expression-regulating protein|]
pgap	AYM39_06580	1413643	1414890	-	4	girp	1248	0		1413643		hypothetical protein		[img|Ga0113560_111334||hypothetical protein|][rast|416.8.peg.1361||FmdC precursor|][proka|PROKKA_01326||hypothetical protein|]
pgap	AYM39_06585	1415076	1415798	+	4	girp	723	0		1415798		hypothetical protein		[img|Ga0113560_111335||hypothetical protein|][rast|416.8.peg.1362||hypothetical protein|][proka|PROKKA_01327||hypothetical protein|]
pgap	AYM39_06590	1416400	1418418	+	4	girp	1989	34.6		1418418		hypothetical protein		[img|Ga0113560_111336||Protein of unknown function (DUF1524)|][rast|416.8.peg.1363||RloF|][proka|PROKKA_01328||hypothetical protein|]
pgap	AYM39_06595	1418668	1419153	+	4	girp	526.5	27		1419153		transposase		[img|Ga0113560_111337||putative transposase|][rast|416.8.peg.1364||Transposase and inactivated derivatives|][proka|PROKKA_01329||Transposase IS200 like protein|]
pgap	AYM39_06600	1419470	1422841	+	4	girp	3372	0		1422841		hybrid sensor histidine kinase/response regulator		[img|Ga0113560_111338||Signal transduction histidine kinase|][rast|416.8.peg.1365||Two-component hybrid sensor and regulator|][proka|PROKKA_01330|arcB|Aerobic respiration control sensor protein ArcB|2.7.13.3]
pgap	AYM39_06605	1422838	1423767	+	4	girp	930	0		1423767		LuxR family transcriptional regulator		[img|Ga0113560_111339||regulatory protein, luxR family|][rast|416.8.peg.1366||Two-component response regulator|][proka|PROKKA_01331|pleD_3|Response regulator PleD|]
pgap	AYM39_06610	1423848	1424576	-	4	girp	729	0		1423848	fabG	beta-ketoacyl-ACP reductase		[img|Ga0113560_111340||3-oxoacyl-[acyl-carrier protein] reductase|1.1.1.100][rast|416.8.peg.1367||3-oxoacyl-[acyl-carrier protein] reductase (EC 1.1.1.100)|1.1.1.100][proka|PROKKA_01332|fabG_3|3-oxoacyl-[acyl-carrier-protein] reductase FabG|1.1.1.100]
pgap	AYM39_06615	1424569	1425525	-	4	girp	957	0		1424569		malonyl CoA-ACP transacylase		[img|Ga0113560_111341||[acyl-carrier-protein] S-malonyltransferase|2.3.1.39][rast|416.8.peg.1368||Malonyl CoA-acyl carrier protein transacylase (EC 2.3.1.39)|2.3.1.39][proka|PROKKA_01333|fabD|Malonyl CoA-acyl carrier protein transacylase|2.3.1.39]
pgap	AYM39_06620	1425527	1426495	-	4	girp	969	0		1425527		3-oxoacyl-ACP synthase		[img|Ga0113560_111342||3-oxoacyl-[acyl-carrier-protein] synthase-3|2.3.1.180][rast|416.8.peg.1369||3-oxoacyl-[acyl-carrier-protein] synthase, KASIII (EC 2.3.1.180)|2.3.1.180][proka|PROKKA_01334|fabH|3-oxoacyl-[acyl-carrier-protein] synthase 3|2.3.1.180]
pgap	AYM39_06625	1426492	1427526	-	4	girp	990	48.6		1426492		phosphate acyltransferase		[img|Ga0113560_111343||glycerol-3-phosphate acyltransferase PlsX|2.3.1.15][rast|416.8.peg.1370||Phosphate:acyl-ACP acyltransferase PlsX|][proka|PROKKA_01335|plsX|Phosphate acyltransferase|2.3.1.-]
pgap	AYM39_06630	1427720	1427902	-	4	girp	183	0		1427720	rpmF	50S ribosomal protein L32		[img|Ga0113560_111344||large subunit ribosomal protein L32|][rast|416.8.peg.1371||LSU ribosomal protein L32p|][proka|PROKKA_01336|rpmF|50S ribosomal protein L32|]
pgap	AYM39_06635	1427904	1428422	-	4	girp	519	0		1427904		hypothetical protein		[img|Ga0113560_111345||uncharacterized protein|][rast|416.8.peg.1372||COG1399 protein, clustered with ribosomal protein L32p|][proka|PROKKA_01337||hypothetical protein|]
pgap	AYM39_06645	1429079	1429927	-	4	girp	849	0		1429079		signal transduction protein		[img|Ga0113560_111347||HD-like signal output (HDOD) domain, no enzymatic activity|][rast|416.8.peg.1374||HD domain protein|][proka|PROKKA_01339||HDOD domain protein|]
pgap	AYM39_06640	1428480	1429082	+	4	girp	603	0		1429082		septum formation inhibitor Maf		[img|Ga0113560_111346||MAF protein|][rast|416.8.peg.1373||FIG146278: Maf/YceF/YhdE family protein|][proka|PROKKA_01338|yceF|Maf-like protein YceF|]
pgap	AYM39_06650	1429928	1430503	-	4	girp	573.8	4.5		1429928		lytic transglycosylase		[img|Ga0113560_111348||Transglycosylase SLT domain-containing protein|][rast|416.8.peg.1375||Membrane-bound lytic murein transglycosylase D precursor (EC 3.2.1.-)|][proka|PROKKA_01340|mltD_2|Membrane-bound lytic murein transglycosylase D precursor|4.2.2.-]
pgap	AYM39_06655	1430529	1431725	-	4	girp	1197	0		1430529		phosphoribosylglycinamide formyltransferase		[img|Ga0113560_111349||phosphoribosylglycinamide formyltransferase 2|2.1.2.2][rast|416.8.peg.1376||Phosphoribosylglycinamide formyltransferase 2 (EC 2.1.2.-)|][proka|PROKKA_01341|purT|Phosphoribosylglycinamide formyltransferase 2|2.1.2.-]
pgap	AYM39_06660	1431722	1433314	-	4	girp	1593	0		1431722		DNA mismatch repair protein MutS		[img|Ga0113560_111350||MutS domain V|][rast|416.8.peg.1377||MutS domain protein, family 6|][proka|PROKKA_01342|mutS2|Endonuclease MutS2|3.1.-.-]
pgap	AYM39_06665	1433346	1434323	-	4	girp	978	0		1433346	hemH	ferrochelatase		[img|Ga0113560_111351||ferrochelatase|4.99.1.1][rast|416.8.peg.1378||Ferrochelatase, protoheme ferro-lyase (EC 4.99.1.1)|4.99.1.1][proka|PROKKA_01343|hemH|Ferrochelatase|4.99.1.1]
pgap	AYM39_06670	1434328	1434873	-	4	girp	546	0		1434328		GTP cyclohydrolase I		[img|Ga0113560_111352|folE|GTP cyclohydrolase I|3.5.4.16][rast|416.8.peg.1379||GTP cyclohydrolase I (EC 3.5.4.16) type 1|3.5.4.16][proka|PROKKA_01344|folE|GTP cyclohydrolase 1|3.5.4.16]
pgap	AYM39_06675	1434913	1435845	-	4	girp	1008.8	76.9		1434913		tRNA dihydrouridine synthase DusA		[img|Ga0113560_111353||tRNA-dihydrouridine synthase A|1.-][rast|416.8.peg.1380||tRNA dihydrouridine synthase A|][proka|PROKKA_01345|dus|putative tRNA-dihydrouridine synthase|1.-.-.-]
pgap	AYM39_06680	1436373	1440212	+	4	girp	3864	48		1440212		hypothetical protein		[img|Ga0113560_111354||diguanylate cyclase (GGDEF) domain-containing protein|][rast|416.8.peg.1381||diguanylate cyclase/phosphodiesterase (GGDEF & EAL domains) with PAS/PAC sensor(s)|][proka|PROKKA_01346|yfgF|Cyclic di-GMP phosphodiesterase YfgF|3.1.4.52]
pgap	AYM39_06685	1440274	1442265	-	4	girp	1992	0		1440274		hypothetical protein		[img|Ga0113560_111355||methyl-accepting chemotaxis protein|][rast|416.8.peg.1382||Methyl-accepting chemotaxis protein|][proka|PROKKA_01347|pctC_1|Methyl-accepting chemotaxis protein PctC|]
pgap	AYM39_06690	1442497	1443240	-	4	girp	674.2	46.5		1442497		hypothetical protein		[img|Ga0113560_111356||hypothetical protein|][rast|416.8.peg.1383||probable transmembrane protein|][proka|PROKKA_01348||hypothetical protein|]
pgap	AYM39_06695	1443296	1444204	-	4	girp	909	0		1443296		ribosome biogenesis GTPase YlqF		[img|Ga0113560_111357||ribosome biogenesis GTPase A|][rast|416.8.peg.1384||50S ribosomal subunit maturation GTPase RbgA (B. subtilis YlqF)|][proka|PROKKA_01349|rbgA|Ribosome biogenesis GTPase A|]
pgap	AYM39_06700	1444395	1445408	+	4	girp	1014	0		1445408	gapA	glyceraldehyde-3-phosphate dehydrogenase		[img|Ga0113560_111358||glyceraldehyde 3-phosphate dehydrogenase|1.2.1.12][rast|416.8.peg.1385||NAD-dependent glyceraldehyde-3-phosphate dehydrogenase (EC 1.2.1.12)|1.2.1.12][proka|PROKKA_01350|gapA|Glyceraldehyde-3-phosphate dehydrogenase 1|1.2.1.12]
pgap	AYM39_06705	1445418	1446851	+	4	girp	1434	0		1446851		pyruvate kinase		[img|Ga0113560_111359||pyruvate kinase|2.7.1.40][rast|416.8.peg.1386||Pyruvate kinase (EC 2.7.1.40)|2.7.1.40][proka|PROKKA_01351|pykA|Pyruvate kinase II|2.7.1.40]
pgap	AYM39_06710	1447223	1448134	+	4	girp	919.5	8.7		1448134		phosphonate ABC transporter substrate-binding protein		[img|Ga0113560_111360||phosphonate transport system substrate-binding protein|][rast|416.8.peg.1387||Phosphonate ABC transporter phosphate-binding periplasmic component (TC 3.A.1.9.1)|][proka|PROKKA_01352||ABC transporter, phosphonate, periplasmic substrate-binding protein|]
pgap	AYM39_06715	1448137	1450527	+	4	girp	2393.2	1.5		1450527		diguanylate cyclase		[img|Ga0113560_111361||PAS domain S-box-containing protein/diguanylate cyclase (GGDEF) domain-containing protein|][rast|416.8.peg.1388||diguanylate cyclase/phosphodiesterase (GGDEF & EAL domains) with PAS/PAC sensor(s)|][proka|PROKKA_01353|gmr_10|Cyclic di-GMP phosphodiesterase Gmr|3.1.4.52]
pgap	AYM39_06720	1451073	1451591	+	3	gip	519	0		1451591		hypothetical protein		[img|Ga0113560_111362||hypothetical protein|][proka|PROKKA_01354||hypothetical protein|]
pgap	AYM39_06725	1451604	1456244	+	4	girp	4641	0		1456244		hypothetical protein		[img|Ga0113560_111363||Protein of unknown function (DUF559)|][rast|416.8.peg.1390||DNA helicase, putative|][proka|PROKKA_01355|recD2|ATP-dependent RecD-like DNA helicase|3.6.4.12]
pgap	AYM39_06730	1456634	1458796	-	4	girp	2163	0		1456634	uvrD	DNA helicase II		[img|Ga0113560_111364||DNA helicase-2 / ATP-dependent DNA helicase PcrA|3.6.4.12][rast|416.8.peg.1391||ATP-dependent DNA helicase UvrD/PcrA|][proka|PROKKA_01356|uvrD|DNA helicase II|3.6.4.12]
pgap	AYM39_06735	1458900	1459157	+	4	girp	258	0		1459157		hypothetical protein		[img|Ga0113560_111365||Protein of unknown function (DUF2892)|][rast|416.8.peg.1392||hypothetical protein|][proka|PROKKA_01357||hypothetical protein|]
pgap	AYM39_06740	1459210	1459650	-	4	girp	441	0		1459210		exlusion protein FxsA		[img|Ga0113560_111366||UPF0716 protein FxsA|][rast|416.8.peg.1393||FxsA protein|][proka|PROKKA_01358||phage T7 F exclusion suppressor FxsA|]
pgap	AYM39_06745	1459720	1460037	+	4	girp	318	0		1460037		dihydroorotate dehydrogenase		[img|Ga0113560_111367||divalent cation tolerance protein|][rast|416.8.peg.1394||Periplasmic divalent cation tolerance protein cutA|][proka|PROKKA_01359|cutA|Divalent-cation tolerance protein CutA|]
pgap	AYM39_06750	1460019	1462244	+	4	girp	2232	6.9		1462244		thiol:disulfide interchange protein		[img|Ga0113560_111368||thiol:disulfide interchange protein DsbD|1.8.1.8][rast|416.8.peg.1395||Cytochrome c-type biogenesis protein DsbD, protein-disulfide reductase (EC 1.8.1.8)|1.8.1.8][proka|PROKKA_01360|dsbD_1|Thiol:disulfide interchange protein DsbD precursor|1.8.1.8]
pgap	AYM39_06755	1462241	1462768	+	4	girp	528	0		1462768		redoxin		[img|Ga0113560_111369||Thiol-disulfide isomerase or thioredoxin|][rast|416.8.peg.1396||Cytochrome c-type biogenesis protein ResA|][proka|PROKKA_01361|resA_3|Thiol-disulfide oxidoreductase ResA|]
pgap	AYM39_06760	1462872	1463333	+	4	girp	441.8	40.5		1463333		3-dehydroquinate dehydratase		[img|Ga0113560_111370||3-dehydroquinate dehydratase-2|4.2.1.10][rast|416.8.peg.1397||3-dehydroquinate dehydratase II (EC 4.2.1.10)|4.2.1.10][proka|PROKKA_01362|aroQ|3-dehydroquinate dehydratase|4.2.1.10]
pgap	AYM39_06765	1463323	1463766	+	4	girp	444	0		1463766		acetyl-CoA carboxylase biotin carboxyl carrier protein subunit		[img|Ga0113560_111371||acetyl-CoA carboxylase biotin carboxyl carrier protein|][rast|416.8.peg.1398||Biotin carboxyl carrier protein of acetyl-CoA carboxylase|][proka|PROKKA_01363|accB|Biotin carboxyl carrier protein of acetyl-CoA carboxylase|]
pgap	AYM39_06770	1463787	1465130	+	4	girp	1344	0		1465130		acetyl-CoA carboxylase biotin carboxylase subunit		[img|Ga0113560_111372||acetyl-CoA carboxylase, biotin carboxylase subunit|6.4.1.2; 6.3.4.14][rast|416.8.peg.1399||Biotin carboxylase of acetyl-CoA carboxylase (EC 6.3.4.14)|6.3.4.14][proka|PROKKA_01364|accC|Biotin carboxylase|6.3.4.14]
pgap	AYM39_06775	1465185	1466069	+	4	girp	885	0		1466069	prmA	ribosomal protein L11 methyltransferase		[img|Ga0113560_111373||ribosomal protein L11 methyltransferase|2.1.1.-][rast|416.8.peg.1400||Ribosomal protein L11 methyltransferase (EC 2.1.1.-)|][proka|PROKKA_01365|prmA|Ribosomal protein L11 methyltransferase|2.1.1.-]
pgap	AYM39_06780	1466073	1466711	+	4	girp	558	162		1466711		hypothetical protein		[img|Ga0113560_111374||MJ0042 family finger-like domain-containing protein|][rast|416.8.peg.1401||hypothetical protein|][proka|PROKKA_01366||hypothetical protein|]
pgap	AYM39_06785	1466718	1467914	+	4	girp	1197	0		1467914		SAM-dependent methyltransferase		[img|Ga0113560_111375||23S rRNA (cytosine1962-C5)-methyltransferase|2.1.1.191][rast|416.8.peg.1402||LSU m5C1962 methyltransferase RlmI|][proka|PROKKA_01367|rlmI|Ribosomal RNA large subunit methyltransferase I|2.1.1.191]
pgap	AYM39_06790	1468092	1468637	+	4	girp	527.2	37.5		1468637		hypothetical protein		[img|Ga0113560_111376||hypothetical protein|][rast|416.8.peg.1404||hypothetical protein|][proka|PROKKA_01368||hypothetical protein|]
pgap	AYM39_06795	1468819	1470426	+	4	girp	1584	48		1470426		exosortase D		[img|Ga0113560_111377||exosortase D, VPLPA-CTERM-specific|][rast|416.8.peg.1405||Eight transmembrane protein EpsH|][proka|PROKKA_01369||Transmembrane exosortase (Exosortase_EpsH)|]
pgap	AYM39_06800	1470512	1471633	+	4	girp	1122	0		1471633		GDP-mannose 4,6 dehydratase		[img|Ga0113560_111378||GDPmannose 4,6-dehydratase|4.2.1.47][rast|416.8.peg.1406||GDP-mannose 4,6-dehydratase (EC 4.2.1.47)|4.2.1.47][proka|PROKKA_01370|gmd|GDP-mannose 4,6-dehydratase|4.2.1.47]
pgap	AYM39_06805	1471640	1472611	+	4	girp	974.2	1.5		1472611		GDP-fucose synthetase		[img|Ga0113560_111379||GDP-L-fucose synthase|1.1.1.271][rast|416.8.peg.1407||GDP-L-fucose synthetase (EC 1.1.1.271)|1.1.1.271][proka|PROKKA_01371|fcl|GDP-L-fucose synthase|1.1.1.271]
img	Ga0113560_111386	1478604	1479296	+	3	irp	693	0		1479296		putative transposase		[rast|416.8.peg.1408||Mobile element protein|][proka|PROKKA_01377||Transposase, Mutator family|]
pgap	AYM39_06835	1478604	1479847	+	4	girp	736.2	338.5	pseudo	1479847		[PSEUDO_pgap: transposase]		[img|Ga0113560_111387||putative transposase|][rast|416.8.peg.1409||Mobile element protein|][proka|PROKKA_01378||Transposase, Mutator family|]
pgap	AYM39_06840	1480024	1480590	-	4	girp	537.8	58.5		1480024		hypothetical protein		[img|Ga0113560_111388||hypothetical protein|][rast|416.8.peg.1410||hypothetical protein|][proka|PROKKA_01379||hypothetical protein|]
pgap	AYM39_06845	1480614	1481432	+	4	girp	787.5	63		1481432		nuclease		[img|Ga0113560_111389||protein of unknown function (DUF4124)|][rast|416.8.peg.1411||Staphylococcus nuclease (SNase) domain|][proka|PROKKA_01380|nucH_1|Thermonuclease precursor|3.1.31.1]
pgap	AYM39_06850	1481437	1481745	-	4	girp	316.5	8.7		1481437		hypothetical protein		[img|Ga0113560_111390||hypothetical protein|][rast|416.8.peg.1412||hypothetical protein|][proka|PROKKA_01381||hypothetical protein|]
pgap	AYM39_06855	1482059	1482556	-	4	girp	498	0		1482059		lipid hydroperoxide peroxidase		[img|Ga0113560_111391||thiol peroxidase, atypical 2-Cys peroxiredoxin|1.11.1.15][rast|416.8.peg.1413||Thiol peroxidase, Tpx-type (EC 1.11.1.15)|1.11.1.15][proka|PROKKA_01382|tpx|Thiol peroxidase|1.11.1.-]
pgap	AYM39_06860	1482597	1483988	-	4	girp	1392	0		1482597		ribosome biogenesis GTPase Der		[img|Ga0113560_111392|der|GTP-binding protein|][rast|416.8.peg.1414||GTP-binding protein EngA|][proka|PROKKA_01383|der|GTPase Der|]
pgap	AYM39_06865	1483993	1485204	-	4	girp	1198.5	27		1483993		outer membrane protein assembly factor BamB		[img|Ga0113560_111393||outer membrane protein assembly factor BamB|][rast|416.8.peg.1415||Outer membrane protein YfgL, lipoprotein component of the protein assembly complex (forms a complex with YaeT, YfiO, and NlpB)|][proka|PROKKA_01384|bamB|Outer membrane protein assembly factor BamB precursor|]
pgap	AYM39_06870	1485233	1485886	-	4	girp	654	0		1485233		hypothetical protein		[img|Ga0113560_111394||Putative negative regulator of RcsB-dependent stress response|][rast|416.8.peg.1416||Mlr7403 protein|][proka|PROKKA_01385|bamD_1|Outer membrane protein assembly factor BamD|]
pgap	AYM39_06875	1485910	1487205	-	4	girp	1296	0		1485910		histidine--tRNA ligase		[img|Ga0113560_111395||histidyl-tRNA synthetase|6.1.1.21][rast|416.8.peg.1417||Histidyl-tRNA synthetase (EC 6.1.1.21)|6.1.1.21][proka|PROKKA_01386|hisS|Histidine--tRNA ligase|6.1.1.21]
pgap	AYM39_06880	1487221	1487979	-	4	girp	759	0		1487221		pilus assembly protein PilW		[img|Ga0113560_111396||type IV pilus assembly protein PilF|][rast|416.8.peg.1418||Type IV pilus biogenesis protein PilF|][proka|PROKKA_01387||tetratricopeptide repeat protein|]
pgap	AYM39_06885	1487969	1489081	-	4	girp	1113	0		1487969		bifunctional tRNA (adenosine(37)-C2)-methyltransferase TrmG/ribosomal RNA large subunit methyltransferase RlmN		[img|Ga0113560_111397||23S rRNA (adenine2503-C2)-methyltransferase|2.1.1.192][rast|416.8.peg.1419||Ribosomal RNA large subunit methyltransferase N (EC 2.1.1.-)|][proka|PROKKA_01388|rlmN_2|Dual-specificity RNA methyltransferase RlmN|2.1.1.-]
pgap	AYM39_06890	1489056	1489487	-	4	girp	432	0		1489056		nucleoside-diphosphate kinase		[img|Ga0113560_111398|ndk|nucleoside-diphosphate kinase|2.7.4.6][rast|416.8.peg.1420||Nucleoside diphosphate kinase (EC 2.7.4.6)|2.7.4.6][proka|PROKKA_01389|ndk|Nucleoside diphosphate kinase|2.7.4.6]
pgap	AYM39_06895	1489626	1491473	-	4	girp	1848	0		1489626	secD	preprotein translocase subunit SecD		[img|Ga0113560_111399||preprotein translocase subunit SecD|][rast|416.8.peg.1421||Protein-export membrane protein SecD (TC 3.A.5.1.1)|][proka|PROKKA_01390||preprotein translocase subunit SecD|]
pgap	AYM39_06900	1491550	1491900	-	4	girp	346.5	3		1491550		preprotein translocase subunit YajC		[img|Ga0113560_111400||preprotein translocase subunit YajC|][rast|416.8.peg.1422||Preprotein translocase subunit YajC (TC 3.A.5.1.1)|][proka|PROKKA_01391||preprotein translocase subunit YajC|]
pgap	AYM39_06905	1492010	1492870	-	4	girp	861	0		1492010		phosphatidylserine decarboxylase		[img|Ga0113560_111401||phosphatidylserine decarboxylase|4.1.1.65][rast|416.8.peg.1423||Phosphatidylserine decarboxylase (EC 4.1.1.65)|4.1.1.65][proka|PROKKA_01392|psd|Phosphatidylserine decarboxylase proenzyme|4.1.1.65]
pgap	AYM39_06910	1492867	1493151	-	4	girp	285	0		1492867		flagellar protein FhlB		[img|Ga0113560_111402||flagellar biosynthesis protein|][rast|416.8.peg.1424||Flagellar biosynthesis protein FlhB|][proka|PROKKA_01393|flhB_2|Flagellar biosynthetic protein FlhB|]
pgap	AYM39_06915	1493157	1493546	-	4	girp	390	0		1493157		7-cyano-7-deazaguanine reductase		[img|Ga0113560_111403|queF|7-cyano-7-deazaguanine reductase|1.7.1.13][rast|416.8.peg.1425||NADPH dependent preQ0 reductase (EC 1.7.1.13)|1.7.1.13][proka|PROKKA_01394|queF|NADPH-dependent 7-cyano-7-deazaguanine reductase|1.7.1.13]
pgap	AYM39_06920	1493814	1494179	+	4	girp	360	6.9		1494179		hypothetical protein		[img|Ga0113560_111404||hypothetical protein|][rast|416.8.peg.1427||hypothetical protein|][proka|PROKKA_01395||hypothetical protein|]
pgap	AYM39_06925	1494267	1495451	-	4	girp	1185	0		1494267		hypothetical protein		[img|Ga0113560_111405||diguanylate cyclase (GGDEF) domain-containing protein|][rast|416.8.peg.1428||FOG: GGDEF domain|][proka|PROKKA_01396|dosC_4|Diguanylate cyclase DosC|2.7.7.65]
pgap	AYM39_06930	1495674	1499171	+	4	girp	3498	0		1499171		chromosome segregation protein SMC		[img|Ga0113560_111406||chromosome segregation protein|][rast|416.8.peg.1429||Chromosome partition protein smc|][proka|PROKKA_01397|smc_1|Chromosome partition protein Smc|]
pgap	AYM39_06935	1499171	1499902	+	4	girp	732	0		1499902		cell division protein FtsZ		[img|Ga0113560_111407||cell division protein ZipA|][rast|416.8.peg.1430||Cell division protein ZipA|][proka|PROKKA_01398|zipA|Cell division protein ZipA|]
pgap	AYM39_06940	1499971	1501770	+	4	girp	1800	0		1501770		elongation factor 4		[img|Ga0113560_111408|lepA|GTP-binding protein LepA|][rast|416.8.peg.1431||Translation elongation factor LepA|][proka|PROKKA_01399|lepA|Elongation factor 4|3.6.5.-]
pgap	AYM39_06945	1501783	1502559	+	4	girp	777	0		1502559		S26 family signal peptidase		[img|Ga0113560_111409||signal peptidase I|3.4.21.89][rast|416.8.peg.1432||Signal peptidase I (EC 3.4.21.89)|3.4.21.89][proka|PROKKA_01400|lepB|Signal peptidase I|3.4.21.89]
pgap	AYM39_06950	1502640	1503017	+	4	girp	378	0		1503017		hypothetical protein		[img|Ga0113560_111410||protein of unknown function (DUF4845)|][rast|416.8.peg.1433||hypothetical protein|][proka|PROKKA_01401||hypothetical protein|]
pgap	AYM39_06955	1503014	1503697	+	4	girp	684	0		1503697	rnc	ribonuclease III		[img|Ga0113560_111411||ribonuclease-3|3.1.26.3][rast|416.8.peg.1434||Ribonuclease III (EC 3.1.26.3)|3.1.26.3][proka|PROKKA_01402|rnc|Ribonuclease 3|3.1.26.3]
pgap	AYM39_06960	1503694	1504584	+	4	girp	891	0		1504584		GTPase Era		[img|Ga0113560_111412||GTP-binding protein Era|][rast|416.8.peg.1435||GTP-binding protein Era|][proka|PROKKA_01403|era_1|GTPase Era|]
pgap	AYM39_06965	1504584	1505285	+	4	girp	702	0		1505285		DNA repair protein RecO		[img|Ga0113560_111413||DNA repair protein RecO (recombination protein O)|][rast|416.8.peg.1436||DNA recombination and repair protein RecO|][proka|PROKKA_01404|recO|DNA repair protein RecO|]
pgap	AYM39_06970	1505327	1506070	+	4	girp	744	0		1506070		pyridoxine 5'-phosphate synthase		[img|Ga0113560_111414||pyridoxine 5-phosphate synthase|2.6.99.2][rast|416.8.peg.1437||Pyridoxine 5'-phosphate synthase (EC 2.6.99.2)|2.6.99.2][proka|PROKKA_01405|pdxJ|Pyridoxine 5'-phosphate synthase|2.6.99.2]
pgap	AYM39_06975	1506075	1506815	+	4	girp	741	0		1506815		serine/threonine protein phosphatase		[img|Ga0113560_111415||protein phosphatase|3.1.3.16][rast|416.8.peg.1438||Protein serine/threonine phosphatase PrpC, regulation of stationary phase|][proka|PROKKA_01406|stp_1|Serine/threonine phosphatase stp|3.1.3.16]
pgap	AYM39_06980	1506897	1507850	-	4	girp	954	0		1506897		AAA family ATPase		[img|Ga0113560_111416||regulatory protein, Fis family|][rast|416.8.peg.1439||Transcriptional regulatory protein zraR|][proka|PROKKA_01407|zraR_1|Transcriptional regulatory protein ZraR|]
pgap	AYM39_06985	1507863	1508588	-	4	girp	726	0		1507863		hypothetical protein		[img|Ga0113560_111417||hypothetical protein|][rast|416.8.peg.1440||Heavy-metal-associated domain (N-terminus) and membrane-bounded cytochrome biogenesis cycZ-like domain, possible membrane copper tolerance protein|][proka|PROKKA_01408||hypothetical protein|]
pgap	AYM39_06990	1508683	1509606	-	4	girp	924	0		1508683		diguanylate cyclase response regulator		[img|Ga0113560_111418||diguanylate cyclase (GGDEF) domain-containing protein|][rast|416.8.peg.1441||Probable two-component response regulator|][proka|PROKKA_01409|cph2_4|Phytochrome-like protein cph2|]
pgap	AYM39_06995	1509611	1513600	-	4	girp	3990	0		1509611		hybrid sensor histidine kinase/response regulator		[img|Ga0113560_111419||PAS domain S-box-containing protein|][rast|416.8.peg.1442||Sensory box histidine kinase/response regulator|][proka|PROKKA_01410|barA_5|Signal transduction histidine-protein kinase BarA|2.7.13.3]
pgap	AYM39_07000	1513699	1514685	-	4	girp	987	0		1513699		EF-P beta-lysylation protein EpmB		[img|Ga0113560_111420||EF-P beta-lysylation protein EpmB|][rast|416.8.peg.1443||Lysyl-lysine 2,3-aminomutase|][proka|PROKKA_01411|epmB|L-lysine 2,3-aminomutase|5.4.3.-]
pgap	AYM39_07005	1514759	1515328	+	4	girp	574.5	9		1515328		elongation factor P		[img|Ga0113560_111421|efp|elongation factor P|][rast|416.8.peg.1444||Translation elongation factor P|][proka|PROKKA_01412|efp|Elongation factor P|]
pgap	AYM39_07010	1515328	1516308	+	4	girp	952.5	32.9		1516308		EF-P lysine aminoacylase GenX		[img|Ga0113560_111422||lysyl-tRNA synthetase, class 2|6.1.1.6][rast|416.8.peg.1445||Translation elongation factor P Lys34:lysine transferase|][proka|PROKKA_01413|epmA|Elongation factor P--(R)-beta-lysine ligase|6.3.1.-]
pgap	AYM39_07015	1516409	1516675	-	4	girp	267	0		1516409		hypothetical protein		[img|Ga0113560_111423||hypothetical protein|][rast|416.8.peg.1446||hypothetical protein|][proka|PROKKA_01414||hypothetical protein|]
pgap	AYM39_07020	1516920	1518710	-	4	girp	1791	0		1516920		aspartate--tRNA ligase		[img|Ga0113560_111424||aspartyl-tRNA synthetase|6.1.1.12][rast|416.8.peg.1447||Aspartyl-tRNA synthetase (EC 6.1.1.12) @ Aspartyl-tRNA(Asn) synthetase (EC 6.1.1.23)|6.1.1.23; 6.1.1.12][proka|PROKKA_01415|aspS|Aspartate--tRNA ligase|6.1.1.12]
pgap	AYM39_07025	1518774	1519046	-	4	girp	273	0		1518774		transcriptional regulator		[img|Ga0113560_111425||putative regulatory protein, FmdB family|][rast|416.8.peg.1448||Conserved domain protein|][proka|PROKKA_01416||Zinc ribbon domain protein|]
pgap	AYM39_07030	1519160	1520200	+	4	girp	1038.8	4.5		1520200		dihydroorotase		[img|Ga0113560_111426||dihydroorotase|3.5.2.3][rast|416.8.peg.1450||Dihydroorotase (EC 3.5.2.3)|3.5.2.3][proka|PROKKA_01417|pyrC_2|Dihydroorotase|3.5.2.3]
pgap	AYM39_07035	1520392	1521975	+	4	girp	1584	0		1521975		glycosyltransferase		[img|Ga0113560_111427||4-amino-4-deoxy-L-arabinose transferase|][rast|416.8.peg.1452||Polymyxin resistance protein ArnT, undecaprenyl phosphate-alpha-L-Ara4N transferase; Melittin resistance protein PqaB|][proka|PROKKA_01418|arnT|Undecaprenyl phosphate-alpha-4-amino-4-deoxy-L-arabinose arabinosyl transferase|2.4.2.43]
pgap	AYM39_07040	1522048	1522773	+	4	girp	726	0		1522773		dolichol-phosphate mannosyltransferase		[img|Ga0113560_111428||dolichol-phosphate mannosyltransferase|2.4.1.83][rast|416.8.peg.1453||Dolichol-phosphate mannosyltransferase|][proka|PROKKA_01419|arnC_2|Undecaprenyl-phosphate 4-deoxy-4-formamido-L-arabinose transferase|2.4.2.53]
pgap	AYM39_07045	1522816	1523187	+	4	girp	372	0		1523187		lipid-A-disaccharide synthase		[img|Ga0113560_111429||Uncharacterized N-terminal domain of lipid-A-disaccharide synthase|][rast|416.8.peg.1454||Lipid A biosynthesis-like protein|][proka|PROKKA_01420||lipid-A-disaccharide synthase|]
pgap	AYM39_07050	1523298	1523789	+	4	girp	492	0		1523789		hypothetical protein		[img|Ga0113560_111430||protein of unknown function (DUF4124)|][rast|416.8.peg.1455||hypothetical protein|][proka|PROKKA_01421||hypothetical protein|]
pgap	AYM39_07060	1524217	1524930	-	4	girp	714	0		1524217		mannose-1-phosphate guanylyltransferase		[img|Ga0113560_111432||MurNAc alpha-1-phosphate uridylyltransferase|2.7.7.-][rast|416.8.peg.1457||Glucose-1-phosphate thymidylyltransferase (EC 2.7.7.24)|2.7.7.24][proka|PROKKA_01423|hddC_1|D-glycero-alpha-D-manno-heptose 1-phosphate guanylyltransferase|2.7.7.71]
pgap	AYM39_07055	1523805	1524230	+	4	girp	426	0		1524230		hypothetical protein		[img|Ga0113560_111431||putative membrane protein|][rast|416.8.peg.1456||Protoporphyrinogen IX oxidase, novel form, HemJ (EC 1.3.-.-)|][proka|PROKKA_01422||hypothetical protein|]
pgap	AYM39_07065	1524927	1525931	-	4	girp	1005	0		1524927		aminoglycoside phosphotransferase		[img|Ga0113560_111433||hypothetical protein|2.7.1.-][rast|416.8.peg.1458||COG3178: Predicted phosphotransferase related to Ser/Thr protein kinases|][proka|PROKKA_01424||Phosphotransferase enzyme family protein|]
pgap	AYM39_07070	1526027	1528900	+	4	girp	2856	20.8		1528900		LPS biosynthesis protein		[img|Ga0113560_111434||LPS-assembly protein|][rast|416.8.peg.1459||Outer membrane protein Imp, required for envelope biogenesis / Organic solvent tolerance protein precursor|][proka|PROKKA_01425|lptD|LPS-assembly protein LptD precursor|]
pgap	AYM39_07075	1528908	1530194	+	4	girp	1287	0		1530194		molecular chaperone SurA		[img|Ga0113560_111435||peptidyl-prolyl cis-trans isomerase SurA|5.2.1.8][rast|416.8.peg.1460||Survival protein SurA precursor (Peptidyl-prolyl cis-trans isomerase SurA) (EC 5.2.1.8)|5.2.1.8][proka|PROKKA_01426|surA|Chaperone SurA precursor|5.2.1.8]
pgap	AYM39_07080	1530201	1530728	+	4	girp	528	0		1530728		hypothetical protein		[img|Ga0113560_111436||ATP-dependent RNA helicase DeaD|3.6.4.13][rast|416.8.peg.1461||Cold-shock DEAD-box protein A|][proka|PROKKA_01427||ATP-dependent RNA helicase DeaD|]
pgap	AYM39_07085	1530754	1533051	-	4	girp	2298	0		1530754		energy transducer TonB		[img|Ga0113560_111437||Outer membrane receptor proteins, mostly Fe transport|][rast|416.8.peg.1462||Outer membrane receptor proteins, mostly Fe transport|][proka|PROKKA_01428||catecholate siderophore receptor CirA|]
pgap	AYM39_07090	1533248	1534396	+	4	girp	1149	0		1534396		ribonuclease D		[img|Ga0113560_111438||ribonuclease D|3.1.13.5][rast|416.8.peg.1463||Ribonuclease D (EC 3.1.26.3)|3.1.26.3][proka|PROKKA_01429|rnd|Ribonuclease D|3.1.13.5]
pgap	AYM39_07095	1534427	1538896	-	4	girp	4485	17.3		1534427		diguanylate cyclase		[img|Ga0113560_111439||PAS domain S-box-containing protein/diguanylate cyclase (GGDEF) domain-containing protein|][rast|416.8.peg.1464||diguanylate cyclase/phosphodiesterase (GGDEF & EAL domains) with PAS/PAC sensor(s)|][proka|PROKKA_01430|gmr_11|Cyclic di-GMP phosphodiesterase Gmr|3.1.4.52]
pgap	AYM39_07100	1538962	1539621	-	4	girp	660	0		1538962		hypothetical protein		[img|Ga0113560_111440||Putative Ca2+/H+ antiporter, TMEM165/GDT1 family|][rast|416.8.peg.1465||Probable transmembrane protein|][proka|PROKKA_01431||hypothetical protein|]
pgap	AYM39_07105	1539673	1540602	-	4	girp	930	0		1539673		hypothetical protein		[img|Ga0113560_111441||zinc transporter, ZIP family|][rast|416.8.peg.1466||Metal transporter, ZIP family|][proka|PROKKA_01432|zupT|Zinc transporter ZupT|]
pgap	AYM39_07110	1540684	1540866	+	1	g	183	0		1540866		hypothetical protein
pgap	AYM39_07115	1540863	1541435	+	4	girp	570.8	4.5		1541435		hypothetical protein		[img|Ga0113560_111442||Protein of unknown function VcgC/VcgE (DUF2780)|][rast|416.8.peg.1467||hypothetical protein|][proka|PROKKA_01433||hypothetical protein|]
pgap	AYM39_07120	1541479	1541877	+	4	girp	399	0		1541877		hypothetical protein		[img|Ga0113560_111443||hypothetical protein|][rast|416.8.peg.1468||hypothetical protein|][proka|PROKKA_01434||hypothetical protein|]
pgap	AYM39_07125	1541941	1543038	+	4	girp	1098	0		1543038		quinolinate synthetase		[img|Ga0113560_111444|nadA|quinolinate synthase|2.5.1.72][rast|416.8.peg.1469||Quinolinate synthetase (EC 2.5.1.72)|2.5.1.72][proka|PROKKA_01435|nadA|Quinolinate synthase A|2.5.1.72]
pgap	AYM39_07130	1543100	1544413	+	4	girp	1296	20.8		1544413		cobyrinic acid a,c-diamide synthase		[img|Ga0113560_111445||cobyrinic acid a,c-diamide synthase|6.3.5.9; 6.3.5.11][rast|416.8.peg.1470||Cobyrinic acid A,C-diamide synthase|][proka|PROKKA_01436|cobB|Cobyrinic acid A,C-diamide synthase|]
pgap	AYM39_07135	1544484	1545533	+	4	girp	1050	0		1545533		DNA recombination/repair protein RecA		[img|Ga0113560_111446|recA|recombination protein RecA|][rast|416.8.peg.1471||RecA protein|][proka|PROKKA_01437||recombinase A|]
pgap	AYM39_07140	1545496	1545993	+	4	girp	480	36		1545993		RecX family transcriptional regulator		[img|Ga0113560_111447||regulatory protein|][rast|416.8.peg.1472||Regulatory protein RecX|][proka|PROKKA_01438|recX|Regulatory protein RecX|]
pgap	AYM39_07145	1546386	1546574	+	2	gr	189	0		1546574		hypothetical protein		[rast|416.8.peg.1474||hypothetical protein|]
img	Ga0113560_111448	1546010	1546699	+	2	ip	690	0		1546699		hypothetical protein		[proka|PROKKA_01439||hypothetical protein|]
pgap	AYM39_07150	1547197	1547406	+	4	girp	239.2	19.5		1547406		hypothetical protein		[img|Ga0113560_111449||hypothetical protein|][rast|416.8.peg.1475||hypothetical protein|][proka|PROKKA_01440||hypothetical protein|]
img	Ga0113560_111450	1547403	1547537	+	3	irp	135	0		1547537		hypothetical protein		[rast|416.8.peg.1476||hypothetical protein|][proka|PROKKA_01441||hypothetical protein|]
pgap	AYM39_07155	1547865	1550465	+	4	girp	2607.8	4.5		1550465		alanine--tRNA ligase		[img|Ga0113560_111451||alanyl-tRNA synthetase|6.1.1.7][rast|416.8.peg.1477||Alanyl-tRNA synthetase (EC 6.1.1.7)|6.1.1.7][proka|PROKKA_01442|alaS|Alanine--tRNA ligase|6.1.1.7]
pgap	AYM39_07160	1550533	1551753	+	4	girp	1221	0		1551753		aspartate kinase		[img|Ga0113560_111452||aspartate kinase|2.7.2.4][rast|416.8.peg.1478||Aspartokinase (EC 2.7.2.4)|2.7.2.4][proka|PROKKA_01443|ask|Aspartokinase|2.7.2.4]
pgap	AYM39_07165	1551988	1552197	+	4	girp	201.8	16.5		1552197		hypothetical protein		[img|Ga0113560_111453||hypothetical protein|][rast|416.8.peg.1479||hypothetical protein|][proka|PROKKA_01444||hypothetical protein|]
pgap	AYM39_07170	1552352	1552567	-	1	g	216	0		1552352		hypothetical protein
img	Ga0113560_111454	1552388	1552573	+	3	irp	186	0		1552573		Putative metal-binding domain of cation transport ATPase		[rast|416.8.peg.1480||hypothetical protein|][proka|PROKKA_01445||Putative metal-binding domain of cation transport ATPase|]
pgap	AYM39_07175	1552591	1552887	+	4	girp	297	0		1552887		hypothetical protein		[img|Ga0113560_111455||hypothetical protein|][rast|416.8.peg.1481||hypothetical protein|][proka|PROKKA_01446||hypothetical protein|]
pgap	AYM39_07180	1552984	1553595	+	4	girp	612	0		1553595		hypothetical protein		[img|Ga0113560_111456||hypothetical protein|][rast|416.8.peg.1482||hypothetical protein|][proka|PROKKA_01447||hypothetical protein|]
pgap	AYM39_07185	1553667	1556117	+	4	girp	2451	0		1556117		ATPase P		[img|Ga0113560_111457||Cu+-exporting ATPase|3.6.3.54][rast|416.8.peg.1483||Lead, cadmium, zinc and mercury transporting ATPase (EC 3.6.3.3) (EC 3.6.3.5); Copper-translocating P-type ATPase (EC 3.6.3.4)|3.6.3.4; 3.6.3.3][proka|PROKKA_01448|copA_2|Copper-exporting P-type ATPase A|3.6.3.54]
pgap	AYM39_07190	1556133	1556963	+	4	girp	833.2	17		1556963		hypothetical protein		[img|Ga0113560_111458||hypothetical protein|][rast|416.8.peg.1484||membrane protein, putative|][proka|PROKKA_01449||hypothetical protein|]
pgap	AYM39_07200	1557404	1557964	+	4	girp	561	0		1557964		hypothetical protein		[img|Ga0113560_111460||exosortase family protein XrtM|][rast|416.8.peg.1485||hypothetical protein|][proka|PROKKA_01451||hypothetical protein|]
pgap	AYM39_07205	1557978	1558559	+	4	girp	610.5	19.2		1558559		hypothetical protein		[img|Ga0113560_111461||hypothetical protein|][rast|416.8.peg.1486||hypothetical protein|][proka|PROKKA_01452||hypothetical protein|]
pgap	AYM39_07210	1558583	1559539	-	4	girp	957	0		1558583		hypothetical protein		[img|Ga0113560_111462||Matrixin|][rast|416.8.peg.1487||hypothetical protein|][proka|PROKKA_01453||Matrixin|]
pgap	AYM39_07215	1559852	1560508	+	4	girp	675	12		1560508		hypothetical protein		[img|Ga0113560_111463||PEP-CTERM protein-sorting domain-containing protein|][rast|416.8.peg.1488||hypothetical protein|][proka|PROKKA_01454||hypothetical protein|]
pgap	AYM39_07220	1560574	1560903	-	4	girp	330	0		1560574		hypothetical protein		[img|Ga0113560_111464||hypothetical protein|][rast|416.8.peg.1489||hypothetical protein|][proka|PROKKA_01455||hypothetical protein|]
pgap	AYM39_07225	1561207	1562436	+	4	girp	1230	0		1562436		glutamate:proton symporter		[img|Ga0113560_111465||Na+/H+-dicarboxylate symporter|][rast|416.8.peg.1491||Proton/glutamate symport protein @ Sodium/glutamate symport protein|][proka|PROKKA_01456|gltT_2|Proton/sodium-glutamate symport protein|]
pgap	AYM39_07230	1562458	1563494	-	4	girp	817.2	146.6	pseudo	1562458		[PSEUDO_pgap: diguanylate cyclase]		[img|Ga0113560_111466||diguanylate cyclase|][rast|416.8.peg.1492||diguanylate cyclase (GGDEF domain) with PAS/PAC sensor|][proka|PROKKA_01457|pleD_4|Response regulator PleD|]
img	Ga0113560_111467	1563195	1563494	-	3	irp	300	0		1563195		diguanylate cyclase		[rast|416.8.peg.1493||hypothetical protein|][proka|PROKKA_01458||hypothetical protein|]
pgap	AYM39_07240	1563968	1564777	-	4	girp	810	0		1563968		N-hydroxyarylamine O-acetyltransferase		[img|Ga0113560_111469||N-hydroxyarylamine O-acetyltransferase|2.3.1.118][rast|416.8.peg.1494||N-hydroxyarylamine O-acetyltransferase (EC 2.3.1.118)|2.3.1.118][proka|PROKKA_01460|nhoA|N-hydroxyarylamine O-acetyltransferase|2.3.1.118]
pgap	AYM39_07245	1564888	1565352	-	4	girp	465	0		1564888		phosphodiesterase		[img|Ga0113560_111470||hypothetical protein|][rast|416.8.peg.1495||phosphoesterase, putative|][proka|PROKKA_01461||phosphodiesterase|]
pgap	AYM39_07250	1565561	1566733	-	4	girp	1173	0		1565561		hypothetical protein		[img|Ga0113560_111471||hypothetical protein|][rast|416.8.peg.1496||COGs COG3146|][proka|PROKKA_01462||hypothetical protein|]
pgap	AYM39_07255	1566749	1567363	+	4	girp	615	0		1567363		methylase		[img|Ga0113560_111472||Protein of unknown function (DUF938)|][rast|416.8.peg.1497||hypothetical protein|][proka|PROKKA_01463||hypothetical protein|]
pgap	AYM39_07260	1567360	1567827	+	4	girp	468	0		1567827		metal-dependent hydrolase		[img|Ga0113560_111473||hypothetical protein|][rast|416.8.peg.1498||COG1451: Predicted metal-dependent hydrolase|][proka|PROKKA_01464||WLM domain protein|]
img	Ga0113560_111474	1567889	1567993	-	2	ip	105	0		1567889		hypothetical protein		[proka|PROKKA_01465||hypothetical protein|]
pgap	AYM39_07265	1568037	1569581	-	4	girp	1545	0		1568037		hypothetical protein		[img|Ga0113560_111475||Adenylate kinase|][rast|416.8.peg.1499||Xanthosine triphosphate pyrophosphatase|][proka|PROKKA_01466||hypothetical protein|]
pgap	AYM39_07270	1569574	1570575	-	4	girp	932.2	51.1		1569574		beta-ribofuranosylaminobenzene 5'-phosphate synthase		[img|Ga0113560_111476||beta-ribofuranosylaminobenzene 5'-phosphate synthase|2.4.2.54][rast|416.8.peg.1500||beta-ribofuranosylaminobenzene 5'-phosphate synthase|][proka|PROKKA_01467||hypothetical protein|]
pgap	AYM39_07275	1570539	1571240	-	3	gip	702	0		1570539		hypothetical protein		[img|Ga0113560_111477||hypothetical protein|][proka|PROKKA_01468||hypothetical protein|]
pgap	AYM39_07280	1571388	1572533	-	4	girp	1146	0		1571388		adenine methyltransferase		[img|Ga0113560_111478||adenine-specific DNA-methyltransferase|2.1.1.72][rast|416.8.peg.1501||Modification methylase DpnIIA (EC 2.1.1.72)|2.1.1.72][proka|PROKKA_01469||D12 class N6 adenine-specific DNA methyltransferase|]
pgap	AYM39_07285	1572620	1572892	-	4	girp	273	0		1572620		addiction module toxin RelE		[img|Ga0113560_111479||mRNA interferase RelE/StbE|][rast|416.8.peg.1502||RelE/StbE replicon stabilization toxin|][proka|PROKKA_01470|relG|Toxin RelG|3.1.-.-]
pgap	AYM39_07290	1572876	1573103	-	4	girp	225.8	1.5		1572876		hypothetical protein		[img|Ga0113560_111480||hypothetical protein|][rast|416.8.peg.1503||hypothetical protein|][proka|PROKKA_01471||hypothetical protein|]
pgap	AYM39_07295	1573433	1573663	-	4	girp	231	0		1573433		hypothetical protein		[img|Ga0113560_111481||antitoxin VapB|][rast|416.8.peg.1504||conserved hypothetical protein, related to putative virulence-associated proteins and nitrogen regulatory protein NtrP|][proka|PROKKA_01472||hypothetical protein|]
pgap	AYM39_07300	1573666	1574256	-	4	girp	591	0		1573666		hypothetical protein		[img|Ga0113560_111482||Endonuclease, Uma2 family (restriction endonuclease fold)|][rast|416.8.peg.1505||hypothetical protein|][proka|PROKKA_01473||hypothetical protein|]
pgap	AYM39_07305	1574558	1575004	-	4	girp	447	0		1574558		hypothetical protein		[img|Ga0113560_111483||Uncharacterized conserved protein YutE, UPF0331/DUF86 family|][rast|416.8.peg.1506||hypothetical protein|][proka|PROKKA_01474||hypothetical protein|]
pgap	AYM39_07310	1574985	1575365	-	4	girp	381	0		1574985		DNA polymerase subunit beta		[img|Ga0113560_111484||Predicted nucleotidyltransferase|][rast|416.8.peg.1507||DNA polymerase, beta domain protein region|][proka|PROKKA_01475||Nucleotidyltransferase domain protein|]
pgap	AYM39_07315	1575381	1578197	-	4	girp	2817	0		1575381		ABC-ATPase UvrA		[img|Ga0113560_111485|uvrA|excinuclease ABC subunit A|][rast|416.8.peg.1508||Excinuclease ABC subunit A|][proka|PROKKA_01476|uvrA|UvrABC system protein A|]
pgap	AYM39_07320	1578363	1580909	+	4	girp	2547	0		1580909		hypothetical protein		[img|Ga0113560_111486||long-chain acyl-CoA synthetase|6.2.1.3][rast|416.8.peg.1510||1-acyl-sn-glycerol-3-phosphate acyltransferase (EC 2.3.1.51)|2.3.1.51][proka|PROKKA_01477|lcfB|Long-chain-fatty-acid--CoA ligase|6.2.1.3]
pgap	AYM39_07325	1580906	1581580	+	4	girp	675	0		1581580		hypothetical protein		[img|Ga0113560_111487||Phosphatidylglycerophosphate synthase|][rast|416.8.peg.1511||CDP-diacylglycerol--glycerol-3-phosphate 3-phosphatidyltransferase (EC 2.7.8.5)|2.7.8.5][proka|PROKKA_01478|pgsA_1|CDP-diacylglycerol--inositol 3-phosphatidyltransferase|2.7.8.11]
pgap	AYM39_07330	1581628	1582539	+	4	girp	918.8	4.5		1582539		hypothetical protein		[img|Ga0113560_111488||phosphatidate cytidylyltransferase|2.7.7.41][rast|416.8.peg.1512||Phosphatidate cytidylyltransferase (EC 2.7.7.41)|2.7.7.41][proka|PROKKA_01479|cdsA_1|Phosphatidate cytidylyltransferase|2.7.7.41]
pgap	AYM39_07335	1582540	1582887	-	4	girp	348	0		1582540		hypothetical protein		[img|Ga0113560_111489||hypothetical protein|][rast|416.8.peg.1513||hypothetical protein|][proka|PROKKA_01480|arnE|4-amino-4-deoxy-L-arabinose-phosphoundecaprenol flippase subunit ArnE|]
pgap	AYM39_07340	1582893	1583741	-	4	girp	843	6.9		1582893		hypothetical protein		[img|Ga0113560_111490||Predicted metal-dependent hydrolase, TIM-barrel fold|][rast|416.8.peg.1514||hypothetical protein|][proka|PROKKA_01481||Amidohydrolase|]
pgap	AYM39_07345	1583744	1584334	-	4	girp	591	0		1583744		hypothetical protein		[img|Ga0113560_111491||hypothetical protein|][rast|416.8.peg.1515||hypothetical protein|][proka|PROKKA_01482||hypothetical protein|]
pgap	AYM39_07350	1584335	1586209	-	4	girp	1875	0		1584335		hypothetical protein		[img|Ga0113560_111492||hypothetical protein|][rast|416.8.peg.1516||hypothetical protein|][proka|PROKKA_01483||hypothetical protein|]
pgap	AYM39_07355	1586221	1586661	-	4	girp	441	0		1586221		hypothetical protein		[img|Ga0113560_111493||hypothetical protein|][rast|416.8.peg.1517||hypothetical protein|][proka|PROKKA_01484||hypothetical protein|]
pgap	AYM39_07360	1586916	1588271	+	4	girp	1364.2	27.4		1588271		MFS transporter		[img|Ga0113560_111494||Predicted arabinose efflux permease, MFS family|][rast|416.8.peg.1519||Putative transport protein|][proka|PROKKA_01485|yajR|Inner membrane transport protein YajR|]
pgap	AYM39_07365	1588302	1588769	+	4	girp	468	0		1588769		single-stranded DNA-binding protein		[img|Ga0113560_111495||single-strand DNA-binding protein|][rast|416.8.peg.1520||Single-stranded DNA-binding protein|][proka|PROKKA_01486|ssb|Single-stranded DNA-binding protein|]
pgap	AYM39_07370	1589042	1594189	+	4	girp	5148	0		1594189		recombinase RecQ		[img|Ga0113560_111496||ATP-dependent DNA helicase RecQ|3.6.4.12][rast|416.8.peg.1521||ATP-dependent DNA helicase RecQ|][proka|PROKKA_01487|recQ_1|ATP-dependent DNA helicase RecQ|3.6.4.12]
pgap	AYM39_07375	1594443	1595327	-	4	girp	885	0		1594443		hypothetical protein		[img|Ga0113560_111497||O-acetylserine/cysteine efflux transporter|][rast|416.8.peg.1522||Permease of the drug/metabolite transporter (DMT) superfamily|][proka|PROKKA_01488|eamA_1|putative amino-acid metabolite efflux pump|]
pgap	AYM39_07380	1595332	1595760	-	4	girp	429	0		1595332		hypothetical protein		[img|Ga0113560_111498||Uncharacterized conserved protein PhnB, glyoxalase superfamily|][rast|416.8.peg.1523||Glyoxylase family protein|][proka|PROKKA_01489||Glyoxalase-like domain protein|]
pgap	AYM39_07385	1595856	1596764	+	4	girp	909	0		1596764		LysR family transcriptional regulator		[img|Ga0113560_111499||DNA-binding transcriptional regulator, LysR family|][rast|416.8.peg.1524||Transcriptional regulator, LysR family|][proka|PROKKA_01490|nodD2_1|Nodulation protein D 2|]
pgap	AYM39_07390	1597587	1598684	-	4	girp	1098	0		1597587		transposase		[img|Ga0113560_111501||Transposase|][rast|416.8.peg.1525||Mobile element protein|][proka|PROKKA_01492||Transposase DDE domain protein|]
img	Ga0113560_111500	1596968	1597621	+	2	ip	654	0		1597621		Type I restriction enzyme R protein N terminus (HSDR_N)		[proka|PROKKA_01491||hypothetical protein|]
img	Ga0113560_111502	1599410	1599541	-	3	irp	130	3.5		1599410		hypothetical protein		[rast|416.8.peg.1526||hypothetical protein|][proka|PROKKA_01493||hypothetical protein|]
pgap	AYM39_07395	1599570	1600643	-	4	girp	1074	0		1599570		SAM-dependent methyltransferase		[img|Ga0113560_111503||Methyltransferase domain-containing protein|][rast|416.8.peg.1527||Bll2645 protein|][proka|PROKKA_01494|rebM_1|Demethylrebeccamycin-D-glucose O-methyltransferase|2.1.1.164]
pgap	AYM39_07405	1601514	1602473	-	4	girp	960	0		1601514		Zn-dependent alcohol dehydrogenase		[img|Ga0113560_111505||Threonine dehydrogenase|][rast|416.8.peg.1529||Threonine dehydrogenase and related Zn-dependent dehydrogenases|][proka|PROKKA_01496|neoA|2-deoxy-scyllo-inosamine dehydrogenase|1.1.1.329]
pgap	AYM39_07400	1601014	1601517	+	4	girp	524.2	13.5		1601517		hypothetical protein		[img|Ga0113560_111504||inner membrane protein|][rast|416.8.peg.1528||hypothetical protein|][proka|PROKKA_01495|ygjV|Inner membrane protein YgjV|]
pgap	AYM39_07410	1602651	1604156	+	4	girp	1506	0		1604156		phenylacetate--CoA ligase		[img|Ga0113560_111506||phenylacetate-CoA ligase|6.2.1.30][rast|416.8.peg.1530||Coenzyme F390 synthetase|][proka|PROKKA_01497||hypothetical protein|]
pgap	AYM39_07415	1604306	1605853	+	4	girp	1525.5	15		1605853		2-isopropylmalate synthase		[img|Ga0113560_111507||D-citramalate synthase|2.3.1.182][rast|416.8.peg.1531||(R)-citramalate synthase (EC 2.3.1.182)|2.3.1.182][proka|PROKKA_01498|leuA_3|2-isopropylmalate synthase|2.3.3.13]
pgap	AYM39_07420	1605981	1606703	+	4	girp	723	0		1606703		pseudouridylate synthase		[img|Ga0113560_111508||tRNA pseudouridine65 synthase|5.4.99.26][rast|416.8.peg.1532||tRNA pseudouridine synthase C (EC 4.2.1.70)|4.2.1.70][proka|PROKKA_01499|truC|tRNA pseudouridine synthase C|5.4.99.26]
pgap	AYM39_07425	1606713	1607108	-	4	girp	396	0		1606713		twitching motility protein PilT		[img|Ga0113560_111509||Predicted nucleic-acid-binding protein, contains PIN domain|][rast|416.8.peg.1533||hypothetical protein|][proka|PROKKA_01500|vapC_2|tRNA(fMet)-specific endonuclease VapC|]
pgap	AYM39_07430	1607105	1607371	-	4	girp	267	0		1607105		hypothetical protein		[img|Ga0113560_111510||looped-hinge helix DNA binding domain-containing protein, AbrB family|][rast|416.8.peg.1534||hypothetical protein|][proka|PROKKA_01501||SpoVT / AbrB like domain protein|]
img	Ga0113560_111511	1607399	1607542	+	3	irp	144	0		1607542		hypothetical protein		[rast|416.8.peg.1535||hypothetical protein|][proka|PROKKA_01502||hypothetical protein|]
pgap	AYM39_07435	1607568	1608164	-	4	girp	597	0		1607568		hypothetical protein		[img|Ga0113560_111512||Endonuclease, Uma2 family (restriction endonuclease fold)|][rast|416.8.peg.1536||protein of unknown function DUF820|][proka|PROKKA_01503||hypothetical protein|]
pgap	AYM39_07440	1608634	1609038	+	4	girp	405	0		1609038		transposase		[img|Ga0113560_111513||hypothetical protein|][rast|416.8.peg.1537||Transposase and inactivated derivatives|][proka|PROKKA_01504||hypothetical protein|]
pgap	AYM39_07445	1609343	1609552	+	4	girp	210	0		1609552		antitoxin of toxin-antitoxin stability system		[img|Ga0113560_111514||antitoxin of type II TA system, VapB|][rast|416.8.peg.1538||hypothetical protein|][proka|PROKKA_01505||Antitoxin VapB32|]
pgap	AYM39_07450	1609549	1609932	+	4	girp	384	0		1609932		twitching motility protein PilT		[img|Ga0113560_111515||hypothetical protein|][rast|416.8.peg.1539||PIN domain protein|][proka|PROKKA_01506||Ribonuclease VapC32|3.1.-.-]
img	Ga0113560_111516	1609957	1610175	-	2	ip	219	0		1609957		hypothetical protein		[proka|PROKKA_01507||hypothetical protein|]
pgap	AYM39_07455	1609975	1610349	+	4	girp	210.8	109.5	pseudo	1610349		[PSEUDO_pgap: transposase]		[img|Ga0113560_111517||hypothetical protein|][rast|416.8.peg.1541||Transposase and inactivated derivatives|][proka|PROKKA_01508||hypothetical protein|]
pgap	AYM39_07460	1610469	1611623	-	4	girp	1131	48		1610469		hypothetical protein		[img|Ga0113560_111518||hypothetical protein|][rast|416.8.peg.1542||FIG00575335: hypothetical protein|][proka|PROKKA_01509||hypothetical protein|]
img	Ga0113560_111519	1612201	1612446	-	3	irp	246	0		1612201		hypothetical protein		[rast|416.8.peg.1544||hypothetical protein|][proka|PROKKA_01510||hypothetical protein|]
pgap	AYM39_07465	1612607	1613713	+	4	girp	1107	0		1613713		3-isopropylmalate dehydrogenase		[img|Ga0113560_111520|leuB|3-isopropylmalate dehydrogenase|1.1.1.85][rast|416.8.peg.1545||3-isopropylmalate dehydrogenase (EC 1.1.1.85)|1.1.1.85][proka|PROKKA_01511|leuB_2|3-isopropylmalate dehydrogenase|1.1.1.85]
pgap	AYM39_07470	1613807	1615060	-	4	girp	1254	0		1613807		hypothetical protein		[img|Ga0113560_111521||hypothetical protein|][rast|416.8.peg.1546||hypothetical protein|][proka|PROKKA_01512||hypothetical protein|]
pgap	AYM39_07475	1615116	1615400	-	4	girp	285	0		1615116		hypothetical protein		[img|Ga0113560_111522||HicA toxin of toxin-antitoxin,|][rast|416.8.peg.1547||HicA protein|][proka|PROKKA_01513||hypothetical protein|]
img	Ga0113560_111523	1615609	1615764	+	3	irp	156	0		1615764		hypothetical protein		[rast|416.8.peg.1549||hypothetical protein|][proka|PROKKA_01514||hypothetical protein|]
pgap	AYM39_07480	1615862	1616173	-	4	girp	312	0		1615862		hypothetical protein		[img|Ga0113560_111524||hypothetical protein|][rast|416.8.peg.1550||hypothetical protein|][proka|PROKKA_01515||hypothetical protein|]
pgap	AYM39_07485	1616167	1616841	-	4	girp	714.8	79.5		1616167		glutathione S-transferase		[img|Ga0113560_111525||Glutathione S-transferase|][rast|416.8.peg.1551||Glutathione S-transferase domain protein|][proka|PROKKA_01516||hypothetical protein|]
pgap	AYM39_07490	1617216	1618808	+	4	girp	1575	12		1618808		ABC transporter ATP-binding protein		[img|Ga0113560_111526||ATPase components of ABC transporters with duplicated ATPase domains|][rast|416.8.peg.1552||ABC transporter ATP-binding protein uup|][proka|PROKKA_01517|yheS_2|putative ABC transporter ATP-binding protein YheS|]
pgap	AYM39_07495	1618816	1619655	-	4	girp	840	0		1618816		hypothetical protein		[img|Ga0113560_111527||ChrR Cupin-like domain-containing protein|][rast|416.8.peg.1553||hypothetical protein|][proka|PROKKA_01518||ChrR Cupin-like domain protein|]
pgap	AYM39_07500	1619648	1620292	-	4	girp	645	0		1619648		RNA polymerase subunit sigma-24		[img|Ga0113560_111528||RNA polymerase sigma-70 factor, ECF subfamily|][rast|416.8.peg.1554||RNA polymerase sigma-70 factor|][proka|PROKKA_01519|rpoE_1|ECF RNA polymerase sigma factor RpoE|]
[truncated: 2,889 more rows]

## Sheet: Legend for S1
Legend for Table S1
[truncated: 16 more rows]

[truncated: 1 more sheets: S2 Secondary metabolites genes]
